# Supplementary material for: Benchmark and integration of resources for the estimation of human transcription factor activities
Source: HighWire-hosted journal article supplement (doi:10.1101/gr.240663.118), 2019-07-24
Supplement: Supplemental_Tables.zip [file GarciaAlonso_supplemental_table_S1.xlsx]

## Sheet: GarciaAlonso_tableS1.csv
#Table S1. List of TFs from TF class and their properties. Columns indicate the 1) TF name; 2) the mode of regulation from Uniprot (The UniProt Consortium 2017); 3) the DNA-binding mode (monomer, homomer or heteromer) derived from Lambert el at (Lambert et al. 2018) and Uniprot; 4) the DNA-binding specificity also from Lambert el at; 5) the mode of interaction with the chromatin (Pioneers, Settle…
TF	mode_of_regulation	DNA_binding_mode	DNA_binding_specificity	chromatin_regulation_mode	TF_superclass	TF_class	tissue_of_expression
ADNP	-	Monomer_or_homomultimer	High_specificity_DNA-binding_protein	migrant	Helix-turn-helix_domains	Homeo_domain_factors	no_tissue-specific
ADNP2	-	Monomer_or_homomultimer	High_specificity_DNA-binding_protein	settler	Helix-turn-helix_domains	Homeo_domain_factors	no_tissue-specific
AEBP2	-	Monomer_or_homomultimer	High_specificity_DNA-binding_protein	pioneer	Zinc-coordinating_DNA-binding_domains	C2H2_zinc_finger_factors	no_tissue-specific
AHR	activators	Monomer_or_homomultimer	High_specificity_DNA-binding_protein	settler	Basic_domains	Basic_helix-loop-helix_factors_(bHLH)	no_tissue-specific
AHRR	repressors	Monomer_or_homomultimer	High_specificity_DNA-binding_protein	-	Basic_domains	Basic_helix-loop-helix_factors_(bHLH)	-
AIRE	activators	Monomer_or_homomultimer	High_specificity_DNA-binding_protein	migrant		SAND_domain_factors	-
ALX1	dual	Monomer_or_homomultimer	High_specificity_DNA-binding_protein	migrant	Helix-turn-helix_domains	Homeo_domain_factors	tissue-specific
ALX3	-	Monomer_or_homomultimer	High_specificity_DNA-binding_protein	migrant	Helix-turn-helix_domains	Homeo_domain_factors	-
ALX4	-	Monomer_or_homomultimer	High_specificity_DNA-binding_protein	migrant	Helix-turn-helix_domains	Homeo_domain_factors	-
AR	activators	Monomer_or_homomultimer	High_specificity_DNA-binding_protein	migrant	Zinc-coordinating_DNA-binding_domains	Nuclear_receptors_with_C4_zinc_fingers	-
ARGFX	-	Monomer_or_homomultimer	High_specificity_DNA-binding_protein	-	Helix-turn-helix_domains	Homeo_domain_factors	-
ARID1A	dual	-	Low_specificity_DNA-binding_protein	settler	Helix-turn-helix_domains	ARID_domain_factors	no_tissue-specific
ARID1B	dual	-	Low_specificity_DNA-binding_protein	settler	Helix-turn-helix_domains	ARID_domain_factors	no_tissue-specific
ARID2	dual	Monomer_or_homomultimer	High_specificity_DNA-binding_protein	-	Helix-turn-helix_domains	ARID_domain_factors	-
ARID3A	-	-	High_specificity_DNA-binding_protein	migrant	Helix-turn-helix_domains	ARID_domain_factors	-
ARID3B	-	-	High_specificity_DNA-binding_protein	pioneer	Helix-turn-helix_domains	ARID_domain_factors	-
ARID3C	-	Monomer_or_homomultimer	High_specificity_DNA-binding_protein	-	Helix-turn-helix_domains	ARID_domain_factors	tissue-specific
ARID4A	-	-	Low_specificity_DNA-binding_protein	settler	Helix-turn-helix_domains	ARID_domain_factors	no_tissue-specific
ARID4B	-	-	Low_specificity_DNA-binding_protein	settler	Helix-turn-helix_domains	ARID_domain_factors	no_tissue-specific
ARID5A	repressors	Monomer_or_homomultimer	High_specificity_DNA-binding_protein	-	Helix-turn-helix_domains	ARID_domain_factors	no_tissue-specific
ARID5B	activators	Monomer_or_homomultimer	High_specificity_DNA-binding_protein	settler	Helix-turn-helix_domains	ARID_domain_factors	no_tissue-specific
ARNT	activators	-	High_specificity_DNA-binding_protein	migrant	Basic_domains	Basic_helix-loop-helix_factors_(bHLH)	no_tissue-specific
ARNT2	-	-	High_specificity_DNA-binding_protein	settler	Basic_domains	Basic_helix-loop-helix_factors_(bHLH)	-
ARNTL	activators	-	High_specificity_DNA-binding_protein	settler	Basic_domains	Basic_helix-loop-helix_factors_(bHLH)	no_tissue-specific
ARNTL2	dual	Obligate_heteromer	High_specificity_DNA-binding_protein	settler	Basic_domains	Basic_helix-loop-helix_factors_(bHLH)	-
ARX	-	Monomer_or_homomultimer	High_specificity_DNA-binding_protein	migrant	Helix-turn-helix_domains	Homeo_domain_factors	-
ASCL1	activators	-	High_specificity_DNA-binding_protein	settler	Basic_domains	Basic_helix-loop-helix_factors_(bHLH)	tissue-specific
ASCL2	-	Monomer_or_homomultimer	High_specificity_DNA-binding_protein	settler	Basic_domains	Basic_helix-loop-helix_factors_(bHLH)	-
ASCL3	repressors	Obligate_heteromer	High_specificity_DNA-binding_protein	-	Basic_domains	Basic_helix-loop-helix_factors_(bHLH)	-
ASCL4	-	Monomer_or_homomultimer	High_specificity_DNA-binding_protein	-	Basic_domains	Basic_helix-loop-helix_factors_(bHLH)	-
ASCL5	-	Monomer_or_homomultimer	High_specificity_DNA-binding_protein	-	Basic_domains	Basic_helix-loop-helix_factors_(bHLH)	-
ATF1	-	Monomer_or_homomultimer	High_specificity_DNA-binding_protein	pioneer	Basic_domains	Basic_leucine_zipper_factors_(bZIP)	no_tissue-specific
ATF2	activators	-	High_specificity_DNA-binding_protein	pioneer	Basic_domains	Basic_leucine_zipper_factors_(bZIP)	no_tissue-specific
ATF3	repressors	-	High_specificity_DNA-binding_protein	pioneer	Basic_domains	Basic_leucine_zipper_factors_(bZIP)	no_tissue-specific
ATF4	activators	-	High_specificity_DNA-binding_protein	pioneer	Basic_domains	Basic_leucine_zipper_factors_(bZIP)	no_tissue-specific
ATF5	dual	Obligate_heteromer	High_specificity_DNA-binding_protein	pioneer	Basic_domains	Basic_leucine_zipper_factors_(bZIP)	no_tissue-specific
ATF6	activators	-	High_specificity_DNA-binding_protein	settler	Basic_domains	Basic_leucine_zipper_factors_(bZIP)	no_tissue-specific
ATF6B	activators	-	High_specificity_DNA-binding_protein	settler	Basic_domains	Basic_leucine_zipper_factors_(bZIP)	no_tissue-specific
ATF7	-	Monomer_or_homomultimer	High_specificity_DNA-binding_protein	settler	Basic_domains	Basic_leucine_zipper_factors_(bZIP)	no_tissue-specific
ATOH1	activators	Monomer_or_homomultimer	High_specificity_DNA-binding_protein	settler	Basic_domains	Basic_helix-loop-helix_factors_(bHLH)	tissue-specific
ATOH7	-	Monomer_or_homomultimer	High_specificity_DNA-binding_protein	-	Basic_domains	Basic_helix-loop-helix_factors_(bHLH)	-
ATOH8	activators	-	High_specificity_DNA-binding_protein	-	Basic_domains	Basic_helix-loop-helix_factors_(bHLH)	-
ATRX	-	-	Low_specificity_DNA-binding_protein	migrant	Zinc-coordinating_DNA-binding_domains	Other_C4_zinc_finger-type_factors	no_tissue-specific
BACH1	dual	Monomer_or_homomultimer	High_specificity_DNA-binding_protein	settler	Basic_domains	Basic_leucine_zipper_factors_(bZIP)	no_tissue-specific
BACH2	dual	Monomer_or_homomultimer	High_specificity_DNA-binding_protein	settler	Basic_domains	Basic_leucine_zipper_factors_(bZIP)	-
BARHL1	-	Monomer_or_homomultimer	High_specificity_DNA-binding_protein	migrant	Helix-turn-helix_domains	Homeo_domain_factors	-
BARHL2	-	Monomer_or_homomultimer	High_specificity_DNA-binding_protein	migrant	Helix-turn-helix_domains	Homeo_domain_factors	tissue-specific
BARX1	-	Monomer_or_homomultimer	High_specificity_DNA-binding_protein	migrant	Helix-turn-helix_domains	Homeo_domain_factors	tissue-specific
BARX2	-	Monomer_or_homomultimer	High_specificity_DNA-binding_protein	migrant	Helix-turn-helix_domains	Homeo_domain_factors	-
BATF	activators	Monomer_or_homomultimer	High_specificity_DNA-binding_protein	pioneer	Basic_domains	Basic_leucine_zipper_factors_(bZIP)	-
BATF2	-	Obligate_heteromer	High_specificity_DNA-binding_protein	-	Basic_domains	Basic_leucine_zipper_factors_(bZIP)	-
BATF3	-	Monomer_or_homomultimer	High_specificity_DNA-binding_protein	pioneer	Basic_domains	Basic_leucine_zipper_factors_(bZIP)	-
BBX	-	Monomer_or_homomultimer	High_specificity_DNA-binding_protein	migrant	Other_all--helical_DNA-binding_domains	High-mobility_group_(HMG)_domain_factors	no_tissue-specific
BCL11A	-	Monomer_or_homomultimer	High_specificity_DNA-binding_protein	settler	Zinc-coordinating_DNA-binding_domains	C2H2_zinc_finger_factors	-
BCL11B	-	Monomer_or_homomultimer	High_specificity_DNA-binding_protein	settler	Zinc-coordinating_DNA-binding_domains	C2H2_zinc_finger_factors	-
BCL3	activators	-	Not_a_DNA_binding_protein	migrant	Immunoglobulin_fold	Rel_homology_region_(RHR)_factors	no_tissue-specific
BCL6	repressors	Monomer_or_homomultimer	High_specificity_DNA-binding_protein	pioneer	Zinc-coordinating_DNA-binding_domains	C2H2_zinc_finger_factors	no_tissue-specific
BCL6B	-	Monomer_or_homomultimer	High_specificity_DNA-binding_protein	pioneer	Zinc-coordinating_DNA-binding_domains	C2H2_zinc_finger_factors	-
BHLHA15	-	-	High_specificity_DNA-binding_protein	settler	Basic_domains	Basic_helix-loop-helix_factors_(bHLH)	-
BHLHA9	-	Obligate_heteromer	High_specificity_DNA-binding_protein	-	Basic_domains	Basic_helix-loop-helix_factors_(bHLH)	-
BHLHE22	repressors	Monomer_or_homomultimer	High_specificity_DNA-binding_protein	-	Basic_domains	Basic_helix-loop-helix_factors_(bHLH)	tissue-specific
BHLHE23	-	Monomer_or_homomultimer	High_specificity_DNA-binding_protein	-	Basic_domains	Basic_helix-loop-helix_factors_(bHLH)	-
BHLHE40	repressors	-	High_specificity_DNA-binding_protein	migrant	Basic_domains	Basic_helix-loop-helix_factors_(bHLH)	no_tissue-specific
BHLHE41	repressors	-	High_specificity_DNA-binding_protein	settler	Basic_domains	Basic_helix-loop-helix_factors_(bHLH)	no_tissue-specific
BNC1	activators	Monomer_or_homomultimer	High_specificity_DNA-binding_protein	settler	Zinc-coordinating_DNA-binding_domains	C2H2_zinc_finger_factors	tissue-specific
BNC2	-	Monomer_or_homomultimer	High_specificity_DNA-binding_protein	-	Zinc-coordinating_DNA-binding_domains	C2H2_zinc_finger_factors	-
BSX	activators	Monomer_or_homomultimer	High_specificity_DNA-binding_protein	-	Helix-turn-helix_domains	Homeo_domain_factors	-
CASZ1	-	Monomer_or_homomultimer	High_specificity_DNA-binding_protein	settler	Zinc-coordinating_DNA-binding_domains	C2H2_zinc_finger_factors	-
CDC5L	activators	Monomer_or_homomultimer	High_specificity_DNA-binding_protein	migrant	Helix-turn-helix_domains	Tryptophan_cluster_factors	no_tissue-specific
CDX1	-	Monomer_or_homomultimer	High_specificity_DNA-binding_protein	migrant	Helix-turn-helix_domains	Homeo_domain_factors	tissue-specific
CDX2	-	Monomer_or_homomultimer	High_specificity_DNA-binding_protein	migrant	Helix-turn-helix_domains	Homeo_domain_factors	tissue-specific
CDX4	-	Monomer_or_homomultimer	High_specificity_DNA-binding_protein	migrant	Helix-turn-helix_domains	Homeo_domain_factors	-
CEBPA	activators	-	High_specificity_DNA-binding_protein	migrant	Basic_domains	Basic_leucine_zipper_factors_(bZIP)	-
CEBPB	-	-	High_specificity_DNA-binding_protein	migrant	Basic_domains	Basic_leucine_zipper_factors_(bZIP)	no_tissue-specific
CEBPD	activators	-	High_specificity_DNA-binding_protein	migrant	Basic_domains	Basic_leucine_zipper_factors_(bZIP)	no_tissue-specific
CEBPE	activators	-	High_specificity_DNA-binding_protein	migrant	Basic_domains	Basic_leucine_zipper_factors_(bZIP)	tissue-specific
CEBPG	-	Monomer_or_homomultimer	High_specificity_DNA-binding_protein	migrant	Basic_domains	Basic_leucine_zipper_factors_(bZIP)	no_tissue-specific
CIC	-	Monomer_or_homomultimer	High_specificity_DNA-binding_protein	migrant	Other_all--helical_DNA-binding_domains	High-mobility_group_(HMG)_domain_factors	no_tissue-specific
CLOCK	activators	-	High_specificity_DNA-binding_protein	settler	Basic_domains	Basic_helix-loop-helix_factors_(bHLH)	no_tissue-specific
CNOT4	-	-	Not_a_DNA_binding_protein	migrant	Zinc-coordinating_DNA-binding_domains	C3H_zinc_finger_factors	no_tissue-specific
CRAMP1	-	-	Not_a_DNA_binding_protein	-	-	-	-
CREB1	-	Monomer_or_homomultimer	High_specificity_DNA-binding_protein	-	Basic_domains	Basic_leucine_zipper_factors_(bZIP)	no_tissue-specific
CREB3	activators	Monomer_or_homomultimer	High_specificity_DNA-binding_protein	settler	Basic_domains	Basic_leucine_zipper_factors_(bZIP)	no_tissue-specific
CREB3L1	activators	Monomer_or_homomultimer	High_specificity_DNA-binding_protein	settler	Basic_domains	Basic_leucine_zipper_factors_(bZIP)	-
CREB3L2	activators	Monomer_or_homomultimer	High_specificity_DNA-binding_protein	-	Basic_domains	Basic_leucine_zipper_factors_(bZIP)	no_tissue-specific
CREB3L3	activators	-	High_specificity_DNA-binding_protein	settler	Basic_domains	Basic_leucine_zipper_factors_(bZIP)	tissue-specific
CREB3L4	activators	Monomer_or_homomultimer	High_specificity_DNA-binding_protein	settler	Basic_domains	Basic_leucine_zipper_factors_(bZIP)	-
CREB5	activators	-	High_specificity_DNA-binding_protein	settler	Basic_domains	Basic_leucine_zipper_factors_(bZIP)	-
CREBL2	-	Monomer_or_homomultimer	High_specificity_DNA-binding_protein	settler	Basic_domains	Basic_leucine_zipper_factors_(bZIP)	no_tissue-specific
CREBZF	activators	Monomer_or_homomultimer	High_specificity_DNA-binding_protein	settler	Basic_domains	Basic_leucine_zipper_factors_(bZIP)	no_tissue-specific
CREM	dual	Monomer_or_homomultimer	High_specificity_DNA-binding_protein	settler	Basic_domains	Basic_leucine_zipper_factors_(bZIP)	no_tissue-specific
CRX	activators	Monomer_or_homomultimer	High_specificity_DNA-binding_protein	migrant	Helix-turn-helix_domains	Homeo_domain_factors	-
CSRNP1	activators	Monomer_or_homomultimer	High_specificity_DNA-binding_protein	-	Yet_undefined_DNA-binding_domains	AXUD/CSRNP_domain_factors	no_tissue-specific
CSRNP2	activators	Monomer_or_homomultimer	High_specificity_DNA-binding_protein	-	Yet_undefined_DNA-binding_domains	AXUD/CSRNP_domain_factors	no_tissue-specific
CSRNP3	activators	Monomer_or_homomultimer	High_specificity_DNA-binding_protein	-	Yet_undefined_DNA-binding_domains	AXUD/CSRNP_domain_factors	tissue-specific
CTCF	dual	Monomer_or_homomultimer	High_specificity_DNA-binding_protein	pioneer	Zinc-coordinating_DNA-binding_domains	C2H2_zinc_finger_factors	no_tissue-specific
CTCFL	-	Monomer_or_homomultimer	High_specificity_DNA-binding_protein	migrant	Zinc-coordinating_DNA-binding_domains	C2H2_zinc_finger_factors	tissue-specific
CUX1	-	Monomer_or_homomultimer	High_specificity_DNA-binding_protein	migrant	Helix-turn-helix_domains	Homeo_domain_factors	no_tissue-specific
CUX2	-	Monomer_or_homomultimer	High_specificity_DNA-binding_protein	migrant	Helix-turn-helix_domains	Homeo_domain_factors	tissue-specific
CXXC1	-	Monomer_or_homomultimer	High_specificity_DNA-binding_protein	migrant	Zinc-coordinating_DNA-binding_domains	CXXC_zinc_finger_factors	no_tissue-specific
DBP	-	-	High_specificity_DNA-binding_protein	migrant	Basic_domains	Basic_leucine_zipper_factors_(bZIP)	-
DBX1	-	Monomer_or_homomultimer	High_specificity_DNA-binding_protein	-	Helix-turn-helix_domains	Homeo_domain_factors	-
DBX2	-	Monomer_or_homomultimer	High_specificity_DNA-binding_protein	-	Helix-turn-helix_domains	Homeo_domain_factors	-
DDIT3	dual	Obligate_heteromer	High_specificity_DNA-binding_protein	migrant	Basic_domains	Basic_leucine_zipper_factors_(bZIP)	no_tissue-specific
DEAF1	dual	Monomer_or_homomultimer	High_specificity_DNA-binding_protein	migrant		SAND_domain_factors	no_tissue-specific
DLX1	dual	Monomer_or_homomultimer	High_specificity_DNA-binding_protein	migrant	Helix-turn-helix_domains	Homeo_domain_factors	-
DLX2	activators	Monomer_or_homomultimer	High_specificity_DNA-binding_protein	migrant	Helix-turn-helix_domains	Homeo_domain_factors	-
DLX3	-	Monomer_or_homomultimer	High_specificity_DNA-binding_protein	migrant	Helix-turn-helix_domains	Homeo_domain_factors	tissue-specific
DLX4	repressors	Monomer_or_homomultimer	High_specificity_DNA-binding_protein	migrant	Helix-turn-helix_domains	Homeo_domain_factors	-
DLX5	activators	Monomer_or_homomultimer	High_specificity_DNA-binding_protein	migrant	Helix-turn-helix_domains	Homeo_domain_factors	tissue-specific
DLX6	-	Monomer_or_homomultimer	High_specificity_DNA-binding_protein	migrant	Helix-turn-helix_domains	Homeo_domain_factors	tissue-specific
DMAP1	dual	-	Low_specificity_DNA-binding_protein	migrant	Helix-turn-helix_domains	Tryptophan_cluster_factors	no_tissue-specific
DMBX1	repressors	Monomer_or_homomultimer	High_specificity_DNA-binding_protein	migrant	Helix-turn-helix_domains	Homeo_domain_factors	-
DMRT1	dual	Monomer_or_homomultimer	High_specificity_DNA-binding_protein	migrant	Zinc-coordinating_DNA-binding_domains	DM-type_intertwined_zinc_finger_factors	tissue-specific
DMRT2	activators	Monomer_or_homomultimer	High_specificity_DNA-binding_protein	migrant	Zinc-coordinating_DNA-binding_domains	DM-type_intertwined_zinc_finger_factors	tissue-specific
DMRT3	-	Monomer_or_homomultimer	High_specificity_DNA-binding_protein	migrant	Zinc-coordinating_DNA-binding_domains	DM-type_intertwined_zinc_finger_factors	tissue-specific
DMRTA1	-	Monomer_or_homomultimer	High_specificity_DNA-binding_protein	migrant	Zinc-coordinating_DNA-binding_domains	DM-type_intertwined_zinc_finger_factors	tissue-specific
DMRTA2	-	Monomer_or_homomultimer	High_specificity_DNA-binding_protein	-	Zinc-coordinating_DNA-binding_domains	DM-type_intertwined_zinc_finger_factors	tissue-specific
DMRTB1	-	Obligate_heteromer	High_specificity_DNA-binding_protein	migrant	Zinc-coordinating_DNA-binding_domains	DM-type_intertwined_zinc_finger_factors	tissue-specific
DMRTC1	-	-	Not_a_DNA_binding_protein	-	-	-	-
DMRTC2	-	Monomer_or_homomultimer	High_specificity_DNA-binding_protein	migrant	Zinc-coordinating_DNA-binding_domains	DM-type_intertwined_zinc_finger_factors	tissue-specific
DMTF1	activators	Monomer_or_homomultimer	High_specificity_DNA-binding_protein	migrant	Helix-turn-helix_domains	Tryptophan_cluster_factors	no_tissue-specific
DNAJC1	-	-	Not_a_DNA_binding_protein	-	Helix-turn-helix_domains	Tryptophan_cluster_factors	no_tissue-specific
DNAJC2	-	-	Not_a_DNA_binding_protein	migrant	Helix-turn-helix_domains	Tryptophan_cluster_factors	no_tissue-specific
DNMT1	-	Monomer_or_homomultimer	High_specificity_DNA-binding_protein	migrant	Zinc-coordinating_DNA-binding_domains	CXXC_zinc_finger_factors	no_tissue-specific
DNMT3A	-	-	Low_specificity_DNA-binding_protein	migrant	Zinc-coordinating_DNA-binding_domains	Other_C4_zinc_finger-type_factors	no_tissue-specific
DNMT3B	-	-	Low_specificity_DNA-binding_protein	-	Zinc-coordinating_DNA-binding_domains	Other_C4_zinc_finger-type_factors	-
DNMT3L	-	-	Not_a_DNA_binding_protein	migrant	Zinc-coordinating_DNA-binding_domains	Other_C4_zinc_finger-type_factors	-
DPRX	-	Monomer_or_homomultimer	High_specificity_DNA-binding_protein	-	Helix-turn-helix_domains	Homeo_domain_factors	-
DRGX	-	Monomer_or_homomultimer	High_specificity_DNA-binding_protein	-	Helix-turn-helix_domains	Homeo_domain_factors	-
DUX1	-	Monomer_or_homomultimer	High_specificity_DNA-binding_protein	-	Helix-turn-helix_domains	Homeo_domain_factors	-
DUX3	-	Monomer_or_homomultimer	High_specificity_DNA-binding_protein	migrant	Helix-turn-helix_domains	Homeo_domain_factors	-
DUX4	-	Monomer_or_homomultimer	High_specificity_DNA-binding_protein	-	Helix-turn-helix_domains	Homeo_domain_factors	-
DUX4L2	-	-	-	-	Helix-turn-helix_domains	Homeo_domain_factors	-
DUX4L3	-	-	-	-	Helix-turn-helix_domains	Homeo_domain_factors	-
DUX4L4	-	-	-	-	Helix-turn-helix_domains	Homeo_domain_factors	-
DUX4L5	-	-	-	-	Helix-turn-helix_domains	Homeo_domain_factors	-
DUX4L6	-	-	-	-	Helix-turn-helix_domains	Homeo_domain_factors	-
DUX4L7	-	-	-	-	Helix-turn-helix_domains	Homeo_domain_factors	-
DUX4L9	-	-	-	-	Helix-turn-helix_domains	Homeo_domain_factors	-
DUX5	-	-	-	-	Helix-turn-helix_domains	Homeo_domain_factors	-
DUXA	-	Monomer_or_homomultimer	High_specificity_DNA-binding_protein	-	Helix-turn-helix_domains	Homeo_domain_factors	-
E2F1	activators	Monomer_or_homomultimer	High_specificity_DNA-binding_protein	pioneer	Helix-turn-helix_domains	Fork_head_/_winged_helix_factors	-
E2F2	activators	Monomer_or_homomultimer	High_specificity_DNA-binding_protein	pioneer	Helix-turn-helix_domains	Fork_head_/_winged_helix_factors	-
E2F3	activators	Monomer_or_homomultimer	High_specificity_DNA-binding_protein	migrant	Helix-turn-helix_domains	Fork_head_/_winged_helix_factors	-
E2F4	activators	Monomer_or_homomultimer	High_specificity_DNA-binding_protein	migrant	Helix-turn-helix_domains	Fork_head_/_winged_helix_factors	no_tissue-specific
E2F5	activators	Monomer_or_homomultimer	High_specificity_DNA-binding_protein	migrant	Helix-turn-helix_domains	Fork_head_/_winged_helix_factors	-
E2F6	repressors	Monomer_or_homomultimer	High_specificity_DNA-binding_protein	migrant	Helix-turn-helix_domains	Fork_head_/_winged_helix_factors	no_tissue-specific
E2F7	dual	Monomer_or_homomultimer	High_specificity_DNA-binding_protein	-	Helix-turn-helix_domains	Fork_head_/_winged_helix_factors	-
E2F8	dual	Monomer_or_homomultimer	High_specificity_DNA-binding_protein	migrant	Helix-turn-helix_domains	Fork_head_/_winged_helix_factors	-
E4F1	dual	Monomer_or_homomultimer	High_specificity_DNA-binding_protein	settler	Zinc-coordinating_DNA-binding_domains	C2H2_zinc_finger_factors	no_tissue-specific
EBF1	activators	-	High_specificity_DNA-binding_protein	settler	Immunoglobulin_fold	Rel_homology_region_(RHR)_factors	-
EBF2	-	-	High_specificity_DNA-binding_protein	migrant	Immunoglobulin_fold	Rel_homology_region_(RHR)_factors	-
EBF3	activators	-	High_specificity_DNA-binding_protein	migrant	Immunoglobulin_fold	Rel_homology_region_(RHR)_factors	-
EBF4	-	-	High_specificity_DNA-binding_protein	migrant	Immunoglobulin_fold	Rel_homology_region_(RHR)_factors	no_tissue-specific
EGR1	activators	Monomer_or_homomultimer	High_specificity_DNA-binding_protein	pioneer	Zinc-coordinating_DNA-binding_domains	C2H2_zinc_finger_factors	no_tissue-specific
EGR2	-	Monomer_or_homomultimer	High_specificity_DNA-binding_protein	pioneer	Zinc-coordinating_DNA-binding_domains	C2H2_zinc_finger_factors	-
EGR3	-	Monomer_or_homomultimer	High_specificity_DNA-binding_protein	pioneer	Zinc-coordinating_DNA-binding_domains	C2H2_zinc_finger_factors	-
EGR4	activators	Monomer_or_homomultimer	High_specificity_DNA-binding_protein	pioneer	Zinc-coordinating_DNA-binding_domains	C2H2_zinc_finger_factors	tissue-specific
EHF	dual	Monomer_or_homomultimer	High_specificity_DNA-binding_protein	pioneer	Helix-turn-helix_domains	Tryptophan_cluster_factors	-
ELF1	activators	Monomer_or_homomultimer	High_specificity_DNA-binding_protein	pioneer	Helix-turn-helix_domains	Tryptophan_cluster_factors	no_tissue-specific
ELF2	activators	Monomer_or_homomultimer	High_specificity_DNA-binding_protein	pioneer	Helix-turn-helix_domains	Tryptophan_cluster_factors	no_tissue-specific
ELF3	activators	Monomer_or_homomultimer	High_specificity_DNA-binding_protein	migrant	Helix-turn-helix_domains	Tryptophan_cluster_factors	-
ELF4	activators	Monomer_or_homomultimer	High_specificity_DNA-binding_protein	pioneer	Helix-turn-helix_domains	Tryptophan_cluster_factors	-
ELF5	activators	Monomer_or_homomultimer	High_specificity_DNA-binding_protein	pioneer	Helix-turn-helix_domains	Tryptophan_cluster_factors	tissue-specific
ELK1	activators	Monomer_or_homomultimer	High_specificity_DNA-binding_protein	pioneer	Helix-turn-helix_domains	Tryptophan_cluster_factors	no_tissue-specific
ELK3	repressors	Monomer_or_homomultimer	High_specificity_DNA-binding_protein	pioneer	Helix-turn-helix_domains	Tryptophan_cluster_factors	no_tissue-specific
ELK4	dual	Monomer_or_homomultimer	High_specificity_DNA-binding_protein	pioneer	Helix-turn-helix_domains	Tryptophan_cluster_factors	no_tissue-specific
ELMSAN1	-	-	Not_a_DNA_binding_protein	-	Helix-turn-helix_domains	Tryptophan_cluster_factors	no_tissue-specific
EMX1	-	Monomer_or_homomultimer	High_specificity_DNA-binding_protein	migrant	Helix-turn-helix_domains	Homeo_domain_factors	tissue-specific
EMX2	-	Monomer_or_homomultimer	High_specificity_DNA-binding_protein	migrant	Helix-turn-helix_domains	Homeo_domain_factors	-
EN1	-	Monomer_or_homomultimer	High_specificity_DNA-binding_protein	migrant	Helix-turn-helix_domains	Homeo_domain_factors	tissue-specific
EN2	-	Monomer_or_homomultimer	High_specificity_DNA-binding_protein	migrant	Helix-turn-helix_domains	Homeo_domain_factors	-
EOMES	activators	Monomer_or_homomultimer	High_specificity_DNA-binding_protein	settler	Immunoglobulin_fold	T-Box_factors	tissue-specific
EPAS1	activators	Monomer_or_homomultimer	High_specificity_DNA-binding_protein	settler	Basic_domains	Basic_helix-loop-helix_factors_(bHLH)	no_tissue-specific
ERF	repressors	Monomer_or_homomultimer	High_specificity_DNA-binding_protein	pioneer	Helix-turn-helix_domains	Tryptophan_cluster_factors	no_tissue-specific
ERG	-	Monomer_or_homomultimer	High_specificity_DNA-binding_protein	pioneer	Helix-turn-helix_domains	Tryptophan_cluster_factors	-
ESR1	activators	-	High_specificity_DNA-binding_protein	settler	Zinc-coordinating_DNA-binding_domains	Nuclear_receptors_with_C4_zinc_fingers	-
ESR2	activators	-	High_specificity_DNA-binding_protein	migrant	Zinc-coordinating_DNA-binding_domains	Nuclear_receptors_with_C4_zinc_fingers	-
ESRRA	-	Monomer_or_homomultimer	High_specificity_DNA-binding_protein	migrant	Zinc-coordinating_DNA-binding_domains	Nuclear_receptors_with_C4_zinc_fingers	no_tissue-specific
ESRRB	dual	Monomer_or_homomultimer	High_specificity_DNA-binding_protein	migrant	Zinc-coordinating_DNA-binding_domains	Nuclear_receptors_with_C4_zinc_fingers	tissue-specific
ESRRG	-	Monomer_or_homomultimer	High_specificity_DNA-binding_protein	migrant	Zinc-coordinating_DNA-binding_domains	Nuclear_receptors_with_C4_zinc_fingers	tissue-specific
ESX1	-	Monomer_or_homomultimer	High_specificity_DNA-binding_protein	migrant	Helix-turn-helix_domains	Homeo_domain_factors	tissue-specific
ETS1	activators	Monomer_or_homomultimer	High_specificity_DNA-binding_protein	-	Helix-turn-helix_domains	Tryptophan_cluster_factors	no_tissue-specific
ETS2	activators	Monomer_or_homomultimer	High_specificity_DNA-binding_protein	-	Helix-turn-helix_domains	Tryptophan_cluster_factors	no_tissue-specific
ETV1	activators	Monomer_or_homomultimer	High_specificity_DNA-binding_protein	pioneer	Helix-turn-helix_domains	Tryptophan_cluster_factors	-
ETV2	-	Monomer_or_homomultimer	High_specificity_DNA-binding_protein	pioneer	Helix-turn-helix_domains	Tryptophan_cluster_factors	tissue-specific
ETV3	repressors	Monomer_or_homomultimer	High_specificity_DNA-binding_protein	pioneer	Helix-turn-helix_domains	Tryptophan_cluster_factors	no_tissue-specific
ETV3L	-	Monomer_or_homomultimer	High_specificity_DNA-binding_protein	-	Helix-turn-helix_domains	Tryptophan_cluster_factors	-
ETV4	activators	Monomer_or_homomultimer	High_specificity_DNA-binding_protein	pioneer	Helix-turn-helix_domains	Tryptophan_cluster_factors	-
ETV5	-	Monomer_or_homomultimer	High_specificity_DNA-binding_protein	pioneer	Helix-turn-helix_domains	Tryptophan_cluster_factors	-
ETV6	repressors	Monomer_or_homomultimer	High_specificity_DNA-binding_protein	pioneer	Helix-turn-helix_domains	Tryptophan_cluster_factors	no_tissue-specific
ETV7	repressors	Monomer_or_homomultimer	High_specificity_DNA-binding_protein	pioneer	Helix-turn-helix_domains	Tryptophan_cluster_factors	-
EVX1	-	Monomer_or_homomultimer	High_specificity_DNA-binding_protein	migrant	Helix-turn-helix_domains	Homeo_domain_factors	tissue-specific
EVX2	-	Monomer_or_homomultimer	High_specificity_DNA-binding_protein	-	Helix-turn-helix_domains	Homeo_domain_factors	tissue-specific
FERD3L	repressors	-	High_specificity_DNA-binding_protein	-	Basic_domains	Basic_helix-loop-helix_factors_(bHLH)	-
FEV	repressors	Monomer_or_homomultimer	High_specificity_DNA-binding_protein	pioneer	Helix-turn-helix_domains	Tryptophan_cluster_factors	tissue-specific
FEZF1	-	Monomer_or_homomultimer	High_specificity_DNA-binding_protein	-	Zinc-coordinating_DNA-binding_domains	C2H2_zinc_finger_factors	tissue-specific
FEZF2	-	Monomer_or_homomultimer	High_specificity_DNA-binding_protein	-	Zinc-coordinating_DNA-binding_domains	C2H2_zinc_finger_factors	-
FIGLA	-	-	High_specificity_DNA-binding_protein	-	Basic_domains	Basic_helix-loop-helix_factors_(bHLH)	-
FIZ1	repressors	Monomer_or_homomultimer	High_specificity_DNA-binding_protein	settler	Zinc-coordinating_DNA-binding_domains	C2H2_zinc_finger_factors	no_tissue-specific
FLI1	activators	Monomer_or_homomultimer	High_specificity_DNA-binding_protein	pioneer	Helix-turn-helix_domains	Tryptophan_cluster_factors	-
FOS	-	-	High_specificity_DNA-binding_protein	migrant	Basic_domains	Basic_leucine_zipper_factors_(bZIP)	no_tissue-specific
FOSB	-	Monomer_or_homomultimer	High_specificity_DNA-binding_protein	settler	Basic_domains	Basic_leucine_zipper_factors_(bZIP)	-
FOSL1	-	Monomer_or_homomultimer	High_specificity_DNA-binding_protein	pioneer	Basic_domains	Basic_leucine_zipper_factors_(bZIP)	-
FOSL2	-	Monomer_or_homomultimer	High_specificity_DNA-binding_protein	settler	Basic_domains	Basic_leucine_zipper_factors_(bZIP)	no_tissue-specific
FOXA1	-	Monomer_or_homomultimer	High_specificity_DNA-binding_protein	migrant	Helix-turn-helix_domains	Fork_head_/_winged_helix_factors	-
FOXA2	-	Monomer_or_homomultimer	High_specificity_DNA-binding_protein	migrant	Helix-turn-helix_domains	Fork_head_/_winged_helix_factors	-
FOXA3	-	Monomer_or_homomultimer	High_specificity_DNA-binding_protein	migrant	Helix-turn-helix_domains	Fork_head_/_winged_helix_factors	-
FOXB1	-	Monomer_or_homomultimer	High_specificity_DNA-binding_protein	migrant	Helix-turn-helix_domains	Fork_head_/_winged_helix_factors	-
FOXB2	-	Monomer_or_homomultimer	High_specificity_DNA-binding_protein	-	Helix-turn-helix_domains	Fork_head_/_winged_helix_factors	-
FOXC1	dual	Monomer_or_homomultimer	High_specificity_DNA-binding_protein	migrant	Helix-turn-helix_domains	Fork_head_/_winged_helix_factors	-
FOXC2	activators	Monomer_or_homomultimer	High_specificity_DNA-binding_protein	migrant	Helix-turn-helix_domains	Fork_head_/_winged_helix_factors	-
FOXD1	activators	Monomer_or_homomultimer	High_specificity_DNA-binding_protein	migrant	Helix-turn-helix_domains	Fork_head_/_winged_helix_factors	tissue-specific
FOXD2	-	Monomer_or_homomultimer	High_specificity_DNA-binding_protein	migrant	Helix-turn-helix_domains	Fork_head_/_winged_helix_factors	tissue-specific
FOXD3	dual	Monomer_or_homomultimer	High_specificity_DNA-binding_protein	migrant	Helix-turn-helix_domains	Fork_head_/_winged_helix_factors	tissue-specific
FOXD4	-	Monomer_or_homomultimer	High_specificity_DNA-binding_protein	migrant	Helix-turn-helix_domains	Fork_head_/_winged_helix_factors	-
FOXD4L1	-	Monomer_or_homomultimer	High_specificity_DNA-binding_protein	migrant	Helix-turn-helix_domains	Fork_head_/_winged_helix_factors	-
FOXD4L3	-	Monomer_or_homomultimer	High_specificity_DNA-binding_protein	migrant	Helix-turn-helix_domains	Fork_head_/_winged_helix_factors	-
FOXD4L4	-	Monomer_or_homomultimer	High_specificity_DNA-binding_protein	migrant	Helix-turn-helix_domains	Fork_head_/_winged_helix_factors	-
FOXD4L5	-	Monomer_or_homomultimer	High_specificity_DNA-binding_protein	-	Helix-turn-helix_domains	Fork_head_/_winged_helix_factors	-
FOXD4L6	-	Monomer_or_homomultimer	High_specificity_DNA-binding_protein	-	Helix-turn-helix_domains	Fork_head_/_winged_helix_factors	-
FOXE1	-	Monomer_or_homomultimer	High_specificity_DNA-binding_protein	migrant	Helix-turn-helix_domains	Fork_head_/_winged_helix_factors	tissue-specific
FOXE3	-	Monomer_or_homomultimer	High_specificity_DNA-binding_protein	migrant	Helix-turn-helix_domains	Fork_head_/_winged_helix_factors	-
FOXF1	activators	Monomer_or_homomultimer	High_specificity_DNA-binding_protein	migrant	Helix-turn-helix_domains	Fork_head_/_winged_helix_factors	-
FOXF2	activators	Monomer_or_homomultimer	High_specificity_DNA-binding_protein	migrant	Helix-turn-helix_domains	Fork_head_/_winged_helix_factors	-
FOXG1	-	Monomer_or_homomultimer	High_specificity_DNA-binding_protein	migrant	Helix-turn-helix_domains	Fork_head_/_winged_helix_factors	tissue-specific
FOXH1	activators	Monomer_or_homomultimer	High_specificity_DNA-binding_protein	migrant	Helix-turn-helix_domains	Fork_head_/_winged_helix_factors	-
FOXI1	activators	Monomer_or_homomultimer	High_specificity_DNA-binding_protein	migrant	Helix-turn-helix_domains	Fork_head_/_winged_helix_factors	tissue-specific
FOXI2	activators	Monomer_or_homomultimer	High_specificity_DNA-binding_protein	-	Helix-turn-helix_domains	Fork_head_/_winged_helix_factors	-
FOXI3	-	Monomer_or_homomultimer	High_specificity_DNA-binding_protein	-	Helix-turn-helix_domains	Fork_head_/_winged_helix_factors	-
FOXJ1	activators	Monomer_or_homomultimer	High_specificity_DNA-binding_protein	migrant	Helix-turn-helix_domains	Fork_head_/_winged_helix_factors	tissue-specific
FOXJ2	activators	Monomer_or_homomultimer	High_specificity_DNA-binding_protein	migrant	Helix-turn-helix_domains	Fork_head_/_winged_helix_factors	no_tissue-specific
FOXJ3	activators	Monomer_or_homomultimer	High_specificity_DNA-binding_protein	migrant	Helix-turn-helix_domains	Fork_head_/_winged_helix_factors	no_tissue-specific
FOXK1	-	Monomer_or_homomultimer	High_specificity_DNA-binding_protein	-	Helix-turn-helix_domains	Fork_head_/_winged_helix_factors	no_tissue-specific
FOXK2	-	Monomer_or_homomultimer	High_specificity_DNA-binding_protein	migrant	Helix-turn-helix_domains	Fork_head_/_winged_helix_factors	no_tissue-specific
FOXL1	-	Monomer_or_homomultimer	High_specificity_DNA-binding_protein	migrant	Helix-turn-helix_domains	Fork_head_/_winged_helix_factors	-
FOXL2	dual	Monomer_or_homomultimer	High_specificity_DNA-binding_protein	migrant	Helix-turn-helix_domains	Fork_head_/_winged_helix_factors	-
FOXM1	dual	Monomer_or_homomultimer	High_specificity_DNA-binding_protein	migrant	Helix-turn-helix_domains	Fork_head_/_winged_helix_factors	-
FOXN1	-	Monomer_or_homomultimer	High_specificity_DNA-binding_protein	migrant	Helix-turn-helix_domains	Fork_head_/_winged_helix_factors	tissue-specific
FOXN2	-	Monomer_or_homomultimer	High_specificity_DNA-binding_protein	migrant	Helix-turn-helix_domains	Fork_head_/_winged_helix_factors	no_tissue-specific
FOXN3	repressors	Monomer_or_homomultimer	High_specificity_DNA-binding_protein	migrant	Helix-turn-helix_domains	Fork_head_/_winged_helix_factors	no_tissue-specific
FOXN4	-	Monomer_or_homomultimer	High_specificity_DNA-binding_protein	migrant	Helix-turn-helix_domains	Fork_head_/_winged_helix_factors	tissue-specific
FOXO1	activators	Monomer_or_homomultimer	High_specificity_DNA-binding_protein	migrant	Helix-turn-helix_domains	Fork_head_/_winged_helix_factors	no_tissue-specific
FOXO3	activators	Monomer_or_homomultimer	High_specificity_DNA-binding_protein	migrant	Helix-turn-helix_domains	Fork_head_/_winged_helix_factors	no_tissue-specific
FOXO4	activators	Monomer_or_homomultimer	High_specificity_DNA-binding_protein	migrant	Helix-turn-helix_domains	Fork_head_/_winged_helix_factors	no_tissue-specific
FOXO6	activators	Monomer_or_homomultimer	High_specificity_DNA-binding_protein	-	Helix-turn-helix_domains	Fork_head_/_winged_helix_factors	-
FOXP1	repressors	Monomer_or_homomultimer	High_specificity_DNA-binding_protein	migrant	Helix-turn-helix_domains	Fork_head_/_winged_helix_factors	no_tissue-specific
FOXP2	repressors	Monomer_or_homomultimer	High_specificity_DNA-binding_protein	migrant	Helix-turn-helix_domains	Fork_head_/_winged_helix_factors	-
FOXP3	dual	Monomer_or_homomultimer	High_specificity_DNA-binding_protein	migrant	Helix-turn-helix_domains	Fork_head_/_winged_helix_factors	-
FOXP4	repressors	Monomer_or_homomultimer	High_specificity_DNA-binding_protein	migrant	Helix-turn-helix_domains	Fork_head_/_winged_helix_factors	no_tissue-specific
FOXQ1	-	Monomer_or_homomultimer	High_specificity_DNA-binding_protein	migrant	Helix-turn-helix_domains	Fork_head_/_winged_helix_factors	-
FOXR1	-	Monomer_or_homomultimer	High_specificity_DNA-binding_protein	-	Helix-turn-helix_domains	Fork_head_/_winged_helix_factors	tissue-specific
FOXR2	-	Monomer_or_homomultimer	High_specificity_DNA-binding_protein	-	Helix-turn-helix_domains	Fork_head_/_winged_helix_factors	-
FOXS1	repressors	Monomer_or_homomultimer	High_specificity_DNA-binding_protein	migrant	Helix-turn-helix_domains	Fork_head_/_winged_helix_factors	-
GABPA	-	Monomer_or_homomultimer	High_specificity_DNA-binding_protein	pioneer	Helix-turn-helix_domains	Tryptophan_cluster_factors	no_tissue-specific
GATA1	dual	Monomer_or_homomultimer	High_specificity_DNA-binding_protein	migrant	Zinc-coordinating_DNA-binding_domains	Other_C4_zinc_finger-type_factors	tissue-specific
GATA2	activators	Monomer_or_homomultimer	High_specificity_DNA-binding_protein	migrant	Zinc-coordinating_DNA-binding_domains	Other_C4_zinc_finger-type_factors	-
GATA3	activators	Monomer_or_homomultimer	High_specificity_DNA-binding_protein	migrant	Zinc-coordinating_DNA-binding_domains	Other_C4_zinc_finger-type_factors	-
GATA4	activators	Monomer_or_homomultimer	High_specificity_DNA-binding_protein	migrant	Zinc-coordinating_DNA-binding_domains	Other_C4_zinc_finger-type_factors	-
GATA5	-	Monomer_or_homomultimer	High_specificity_DNA-binding_protein	migrant	Zinc-coordinating_DNA-binding_domains	Other_C4_zinc_finger-type_factors	-
GATA6	activators	Monomer_or_homomultimer	High_specificity_DNA-binding_protein	migrant	Zinc-coordinating_DNA-binding_domains	Other_C4_zinc_finger-type_factors	-
GATAD1	-	-	Not_a_DNA_binding_protein	migrant	Zinc-coordinating_DNA-binding_domains	Other_C4_zinc_finger-type_factors	no_tissue-specific
GATAD2A	repressors	Monomer_or_homomultimer	High_specificity_DNA-binding_protein	migrant	Zinc-coordinating_DNA-binding_domains	Other_C4_zinc_finger-type_factors	no_tissue-specific
GATAD2B	repressors	Monomer_or_homomultimer	High_specificity_DNA-binding_protein	migrant	Zinc-coordinating_DNA-binding_domains	Other_C4_zinc_finger-type_factors	no_tissue-specific
GBX1	-	Monomer_or_homomultimer	High_specificity_DNA-binding_protein	-	Helix-turn-helix_domains	Homeo_domain_factors	tissue-specific
GBX2	-	Monomer_or_homomultimer	High_specificity_DNA-binding_protein	migrant	Helix-turn-helix_domains	Homeo_domain_factors	-
GCM1	-	Monomer_or_homomultimer	High_specificity_DNA-binding_protein	settler		GCM_domain_factors	-
GCM2	-	Monomer_or_homomultimer	High_specificity_DNA-binding_protein	settler		GCM_domain_factors	-
GFI1	repressors	Monomer_or_homomultimer	High_specificity_DNA-binding_protein	migrant	Zinc-coordinating_DNA-binding_domains	C2H2_zinc_finger_factors	-
GFI1B	dual	Monomer_or_homomultimer	High_specificity_DNA-binding_protein	migrant	Zinc-coordinating_DNA-binding_domains	C2H2_zinc_finger_factors	tissue-specific
GLI1	activators	Monomer_or_homomultimer	High_specificity_DNA-binding_protein	migrant	Zinc-coordinating_DNA-binding_domains	C2H2_zinc_finger_factors	-
GLI2	dual	Monomer_or_homomultimer	High_specificity_DNA-binding_protein	migrant	Zinc-coordinating_DNA-binding_domains	C2H2_zinc_finger_factors	-
GLI3	dual	Monomer_or_homomultimer	High_specificity_DNA-binding_protein	migrant	Zinc-coordinating_DNA-binding_domains	C2H2_zinc_finger_factors	-
GLI4	-	Monomer_or_homomultimer	High_specificity_DNA-binding_protein	pioneer	Zinc-coordinating_DNA-binding_domains	C2H2_zinc_finger_factors	no_tissue-specific
GLIS1	-	Monomer_or_homomultimer	High_specificity_DNA-binding_protein	pioneer	Zinc-coordinating_DNA-binding_domains	C2H2_zinc_finger_factors	-
GLIS2	dual	Monomer_or_homomultimer	High_specificity_DNA-binding_protein	migrant	Zinc-coordinating_DNA-binding_domains	C2H2_zinc_finger_factors	-
GLIS3	-	Monomer_or_homomultimer	High_specificity_DNA-binding_protein	pioneer	Zinc-coordinating_DNA-binding_domains	C2H2_zinc_finger_factors	-
GMEB1	-	Monomer_or_homomultimer	High_specificity_DNA-binding_protein	migrant		SAND_domain_factors	-
GMEB2	-	Monomer_or_homomultimer	High_specificity_DNA-binding_protein	migrant		SAND_domain_factors	no_tissue-specific
GRHL1	dual	Monomer_or_homomultimer	High_specificity_DNA-binding_protein	migrant	Immunoglobulin_fold	Grainyhead_domain_factors	-
GRHL2	dual	Monomer_or_homomultimer	High_specificity_DNA-binding_protein	-	Immunoglobulin_fold	Grainyhead_domain_factors	-
GRHL3	dual	Monomer_or_homomultimer	High_specificity_DNA-binding_protein	-	Immunoglobulin_fold	Grainyhead_domain_factors	-
GSC	-	Monomer_or_homomultimer	High_specificity_DNA-binding_protein	migrant	Helix-turn-helix_domains	Homeo_domain_factors	tissue-specific
GSC2	-	Monomer_or_homomultimer	High_specificity_DNA-binding_protein	migrant	Helix-turn-helix_domains	Homeo_domain_factors	tissue-specific
GSX1	activators	Monomer_or_homomultimer	High_specificity_DNA-binding_protein	migrant	Helix-turn-helix_domains	Homeo_domain_factors	-
GSX2	-	Monomer_or_homomultimer	High_specificity_DNA-binding_protein	migrant	Helix-turn-helix_domains	Homeo_domain_factors	-
GTF3A	-	Monomer_or_homomultimer	High_specificity_DNA-binding_protein	pioneer	Zinc-coordinating_DNA-binding_domains	C2H2_zinc_finger_factors	no_tissue-specific
GZF1	repressors	Monomer_or_homomultimer	High_specificity_DNA-binding_protein	pioneer	Zinc-coordinating_DNA-binding_domains	C2H2_zinc_finger_factors	no_tissue-specific
HAND1	-	Obligate_heteromer	High_specificity_DNA-binding_protein	settler	Basic_domains	Basic_helix-loop-helix_factors_(bHLH)	tissue-specific
HAND2	-	Monomer_or_homomultimer	High_specificity_DNA-binding_protein	settler	Basic_domains	Basic_helix-loop-helix_factors_(bHLH)	-
HBP1	repressors	Monomer_or_homomultimer	High_specificity_DNA-binding_protein	migrant	Other_all--helical_DNA-binding_domains	High-mobility_group_(HMG)_domain_factors	no_tissue-specific
HDX	-	Monomer_or_homomultimer	High_specificity_DNA-binding_protein	migrant	Helix-turn-helix_domains	Homeo_domain_factors	-
HELT	repressors	Monomer_or_homomultimer	High_specificity_DNA-binding_protein	-	Basic_domains	Basic_helix-loop-helix_factors_(bHLH)	-
HES1	repressors	Monomer_or_homomultimer	High_specificity_DNA-binding_protein	settler	Basic_domains	Basic_helix-loop-helix_factors_(bHLH)	no_tissue-specific
HES2	repressors	Monomer_or_homomultimer	High_specificity_DNA-binding_protein	settler	Basic_domains	Basic_helix-loop-helix_factors_(bHLH)	-
HES3	repressors	Monomer_or_homomultimer	High_specificity_DNA-binding_protein	-	Basic_domains	Basic_helix-loop-helix_factors_(bHLH)	-
HES4	repressors	Monomer_or_homomultimer	High_specificity_DNA-binding_protein	settler	Basic_domains	Basic_helix-loop-helix_factors_(bHLH)	no_tissue-specific
HES5	repressors	Monomer_or_homomultimer	High_specificity_DNA-binding_protein	-	Basic_domains	Basic_helix-loop-helix_factors_(bHLH)	tissue-specific
HES6	-	Monomer_or_homomultimer	High_specificity_DNA-binding_protein	settler	Basic_domains	Basic_helix-loop-helix_factors_(bHLH)	-
HES7	repressors	Monomer_or_homomultimer	High_specificity_DNA-binding_protein	settler	Basic_domains	Basic_helix-loop-helix_factors_(bHLH)	-
HESX1	-	Monomer_or_homomultimer	High_specificity_DNA-binding_protein	migrant	Helix-turn-helix_domains	Homeo_domain_factors	tissue-specific
HEY1	dual	Monomer_or_homomultimer	High_specificity_DNA-binding_protein	settler	Basic_domains	Basic_helix-loop-helix_factors_(bHLH)	-
HEY2	dual	Monomer_or_homomultimer	High_specificity_DNA-binding_protein	settler	Basic_domains	Basic_helix-loop-helix_factors_(bHLH)	-
HEYL	dual	Monomer_or_homomultimer	High_specificity_DNA-binding_protein	settler	Basic_domains	Basic_helix-loop-helix_factors_(bHLH)	no_tissue-specific
HHEX	repressors	Monomer_or_homomultimer	High_specificity_DNA-binding_protein	migrant	Helix-turn-helix_domains	Homeo_domain_factors	-
HIC1	repressors	Monomer_or_homomultimer	High_specificity_DNA-binding_protein	pioneer	Zinc-coordinating_DNA-binding_domains	C2H2_zinc_finger_factors	-
HIC2	repressors	Monomer_or_homomultimer	High_specificity_DNA-binding_protein	pioneer	Zinc-coordinating_DNA-binding_domains	C2H2_zinc_finger_factors	-
HIF1A	activators	Obligate_heteromer	High_specificity_DNA-binding_protein	migrant	Basic_domains	Basic_helix-loop-helix_factors_(bHLH)	no_tissue-specific
HIF3A	-	Obligate_heteromer	High_specificity_DNA-binding_protein	settler	Basic_domains	Basic_helix-loop-helix_factors_(bHLH)	-
HINFP	dual	Monomer_or_homomultimer	High_specificity_DNA-binding_protein	pioneer	Zinc-coordinating_DNA-binding_domains	C2H2_zinc_finger_factors	no_tissue-specific
HIVEP1	-	Monomer_or_homomultimer	High_specificity_DNA-binding_protein	pioneer	Zinc-coordinating_DNA-binding_domains	C2H2_zinc_finger_factors	-
HIVEP2	-	Monomer_or_homomultimer	High_specificity_DNA-binding_protein	pioneer	Zinc-coordinating_DNA-binding_domains	C2H2_zinc_finger_factors	no_tissue-specific
HIVEP3	-	Monomer_or_homomultimer	High_specificity_DNA-binding_protein	pioneer	Zinc-coordinating_DNA-binding_domains	C2H2_zinc_finger_factors	-
HKR1	-	Monomer_or_homomultimer	High_specificity_DNA-binding_protein	pioneer	Zinc-coordinating_DNA-binding_domains	C2H2_zinc_finger_factors	no_tissue-specific
HLF	-	-	High_specificity_DNA-binding_protein	migrant	Basic_domains	Basic_leucine_zipper_factors_(bZIP)	-
HLX	-	Monomer_or_homomultimer	High_specificity_DNA-binding_protein	migrant	Helix-turn-helix_domains	Homeo_domain_factors	-
HMBOX1	repressors	Monomer_or_homomultimer	High_specificity_DNA-binding_protein	migrant	Helix-turn-helix_domains	Homeo_domain_factors	no_tissue-specific
HMG20A	-	Monomer_or_homomultimer	High_specificity_DNA-binding_protein	migrant	Other_all--helical_DNA-binding_domains	High-mobility_group_(HMG)_domain_factors	no_tissue-specific
HMG20B	-	Monomer_or_homomultimer	High_specificity_DNA-binding_protein	migrant	Other_all--helical_DNA-binding_domains	High-mobility_group_(HMG)_domain_factors	no_tissue-specific
HMGA1	-	Monomer_or_homomultimer	High_specificity_DNA-binding_protein	migrant		A.T_hook_factors	no_tissue-specific
HMGA2	-	Monomer_or_homomultimer	High_specificity_DNA-binding_protein	settler		A.T_hook_factors	-
HMGXB3	-	-	Low_specificity_DNA-binding_protein	migrant	Other_all--helical_DNA-binding_domains	High-mobility_group_(HMG)_domain_factors	no_tissue-specific
HMGXB4	-	-	Low_specificity_DNA-binding_protein	migrant	Other_all--helical_DNA-binding_domains	High-mobility_group_(HMG)_domain_factors	no_tissue-specific
HMX1	-	Monomer_or_homomultimer	High_specificity_DNA-binding_protein	migrant	Helix-turn-helix_domains	Homeo_domain_factors	-
HMX2	-	Monomer_or_homomultimer	High_specificity_DNA-binding_protein	-	Helix-turn-helix_domains	Homeo_domain_factors	-
HMX3	-	Monomer_or_homomultimer	High_specificity_DNA-binding_protein	-	Helix-turn-helix_domains	Homeo_domain_factors	-
HNF1A	activators	Monomer_or_homomultimer	High_specificity_DNA-binding_protein	migrant	Helix-turn-helix_domains	Homeo_domain_factors	tissue-specific
HNF1B	-	-	High_specificity_DNA-binding_protein	migrant	Helix-turn-helix_domains	Homeo_domain_factors	-
HNF4A	-	Monomer_or_homomultimer	High_specificity_DNA-binding_protein	migrant	Zinc-coordinating_DNA-binding_domains	Nuclear_receptors_with_C4_zinc_fingers	-
HNF4G	-	Monomer_or_homomultimer	High_specificity_DNA-binding_protein	migrant	Zinc-coordinating_DNA-binding_domains	Nuclear_receptors_with_C4_zinc_fingers	-
HOMEZ	-	Monomer_or_homomultimer	High_specificity_DNA-binding_protein	migrant	Helix-turn-helix_domains	Homeo_domain_factors	no_tissue-specific
HOPX	-	-	Not_a_DNA_binding_protein	migrant	Helix-turn-helix_domains	Homeo_domain_factors	-
HOXA1	-	Monomer_or_homomultimer	High_specificity_DNA-binding_protein	migrant	Helix-turn-helix_domains	Homeo_domain_factors	-
HOXA10	-	Monomer_or_homomultimer	High_specificity_DNA-binding_protein	migrant	Helix-turn-helix_domains	Homeo_domain_factors	-
HOXA11	-	Monomer_or_homomultimer	High_specificity_DNA-binding_protein	migrant	Helix-turn-helix_domains	Homeo_domain_factors	-
HOXA13	-	Monomer_or_homomultimer	High_specificity_DNA-binding_protein	migrant	Helix-turn-helix_domains	Homeo_domain_factors	-
HOXA2	-	Monomer_or_homomultimer	High_specificity_DNA-binding_protein	migrant	Helix-turn-helix_domains	Homeo_domain_factors	-
HOXA3	-	Monomer_or_homomultimer	High_specificity_DNA-binding_protein	migrant	Helix-turn-helix_domains	Homeo_domain_factors	-
HOXA4	-	Monomer_or_homomultimer	High_specificity_DNA-binding_protein	migrant	Helix-turn-helix_domains	Homeo_domain_factors	-
HOXA5	-	Monomer_or_homomultimer	High_specificity_DNA-binding_protein	migrant	Helix-turn-helix_domains	Homeo_domain_factors	-
HOXA6	-	Monomer_or_homomultimer	High_specificity_DNA-binding_protein	migrant	Helix-turn-helix_domains	Homeo_domain_factors	-
HOXA7	-	Monomer_or_homomultimer	High_specificity_DNA-binding_protein	migrant	Helix-turn-helix_domains	Homeo_domain_factors	tissue-specific
HOXA9	-	Monomer_or_homomultimer	High_specificity_DNA-binding_protein	migrant	Helix-turn-helix_domains	Homeo_domain_factors	-
HOXB1	-	Monomer_or_homomultimer	High_specificity_DNA-binding_protein	migrant	Helix-turn-helix_domains	Homeo_domain_factors	-
HOXB13	-	Monomer_or_homomultimer	High_specificity_DNA-binding_protein	migrant	Helix-turn-helix_domains	Homeo_domain_factors	tissue-specific
HOXB2	-	Monomer_or_homomultimer	High_specificity_DNA-binding_protein	migrant	Helix-turn-helix_domains	Homeo_domain_factors	-
HOXB3	-	Monomer_or_homomultimer	High_specificity_DNA-binding_protein	migrant	Helix-turn-helix_domains	Homeo_domain_factors	-
HOXB4	-	Monomer_or_homomultimer	High_specificity_DNA-binding_protein	migrant	Helix-turn-helix_domains	Homeo_domain_factors	-
HOXB5	-	Monomer_or_homomultimer	High_specificity_DNA-binding_protein	migrant	Helix-turn-helix_domains	Homeo_domain_factors	-
HOXB6	-	Monomer_or_homomultimer	High_specificity_DNA-binding_protein	migrant	Helix-turn-helix_domains	Homeo_domain_factors	-
HOXB7	-	Monomer_or_homomultimer	High_specificity_DNA-binding_protein	migrant	Helix-turn-helix_domains	Homeo_domain_factors	-
HOXB8	-	Monomer_or_homomultimer	High_specificity_DNA-binding_protein	migrant	Helix-turn-helix_domains	Homeo_domain_factors	-
HOXB9	-	Monomer_or_homomultimer	High_specificity_DNA-binding_protein	migrant	Helix-turn-helix_domains	Homeo_domain_factors	tissue-specific
HOXC10	-	Monomer_or_homomultimer	High_specificity_DNA-binding_protein	migrant	Helix-turn-helix_domains	Homeo_domain_factors	-
HOXC11	-	Monomer_or_homomultimer	High_specificity_DNA-binding_protein	migrant	Helix-turn-helix_domains	Homeo_domain_factors	tissue-specific
HOXC12	-	Monomer_or_homomultimer	High_specificity_DNA-binding_protein	migrant	Helix-turn-helix_domains	Homeo_domain_factors	tissue-specific
HOXC13	-	Monomer_or_homomultimer	High_specificity_DNA-binding_protein	migrant	Helix-turn-helix_domains	Homeo_domain_factors	tissue-specific
HOXC4	-	Monomer_or_homomultimer	High_specificity_DNA-binding_protein	migrant	Helix-turn-helix_domains	Homeo_domain_factors	-
HOXC5	-	Monomer_or_homomultimer	High_specificity_DNA-binding_protein	migrant	Helix-turn-helix_domains	Homeo_domain_factors	-
HOXC6	-	Monomer_or_homomultimer	High_specificity_DNA-binding_protein	migrant	Helix-turn-helix_domains	Homeo_domain_factors	-
HOXC8	-	Monomer_or_homomultimer	High_specificity_DNA-binding_protein	migrant	Helix-turn-helix_domains	Homeo_domain_factors	-
HOXC9	-	Monomer_or_homomultimer	High_specificity_DNA-binding_protein	migrant	Helix-turn-helix_domains	Homeo_domain_factors	-
HOXD1	-	Monomer_or_homomultimer	High_specificity_DNA-binding_protein	migrant	Helix-turn-helix_domains	Homeo_domain_factors	-
HOXD10	-	Monomer_or_homomultimer	High_specificity_DNA-binding_protein	migrant	Helix-turn-helix_domains	Homeo_domain_factors	-
HOXD11	-	Monomer_or_homomultimer	High_specificity_DNA-binding_protein	migrant	Helix-turn-helix_domains	Homeo_domain_factors	-
HOXD12	-	Monomer_or_homomultimer	High_specificity_DNA-binding_protein	migrant	Helix-turn-helix_domains	Homeo_domain_factors	-
HOXD13	-	Monomer_or_homomultimer	High_specificity_DNA-binding_protein	migrant	Helix-turn-helix_domains	Homeo_domain_factors	-
HOXD3	-	Monomer_or_homomultimer	High_specificity_DNA-binding_protein	migrant	Helix-turn-helix_domains	Homeo_domain_factors	tissue-specific
HOXD4	-	Monomer_or_homomultimer	High_specificity_DNA-binding_protein	migrant	Helix-turn-helix_domains	Homeo_domain_factors	-
HOXD8	-	Monomer_or_homomultimer	High_specificity_DNA-binding_protein	migrant	Helix-turn-helix_domains	Homeo_domain_factors	-
HOXD9	-	Monomer_or_homomultimer	High_specificity_DNA-binding_protein	migrant	Helix-turn-helix_domains	Homeo_domain_factors	-
HSF1	activators	Monomer_or_homomultimer	High_specificity_DNA-binding_protein	settler	Helix-turn-helix_domains	Heat_shock_factors	no_tissue-specific
HSF2	activators	Monomer_or_homomultimer	High_specificity_DNA-binding_protein	settler	Helix-turn-helix_domains	Heat_shock_factors	no_tissue-specific
HSF4	dual	Monomer_or_homomultimer	High_specificity_DNA-binding_protein	settler	Helix-turn-helix_domains	Heat_shock_factors	no_tissue-specific
HSF5	-	Monomer_or_homomultimer	High_specificity_DNA-binding_protein	-	Helix-turn-helix_domains	Heat_shock_factors	tissue-specific
HSFX1	-	Monomer_or_homomultimer	High_specificity_DNA-binding_protein	settler	-	-	-
HSFY1	-	Monomer_or_homomultimer	High_specificity_DNA-binding_protein	settler	-	-	-
ID1	repressors	Obligate_heteromer	Not_a_DNA_binding_protein	settler	Basic_domains	Basic_helix-loop-helix_factors_(bHLH)	no_tissue-specific
ID2	repressors	Obligate_heteromer	Not_a_DNA_binding_protein	settler	Basic_domains	Basic_helix-loop-helix_factors_(bHLH)	no_tissue-specific
ID3	repressors	Obligate_heteromer	Not_a_DNA_binding_protein	settler	Basic_domains	Basic_helix-loop-helix_factors_(bHLH)	no_tissue-specific
ID4	-	Obligate_heteromer	Not_a_DNA_binding_protein	settler	Basic_domains	Basic_helix-loop-helix_factors_(bHLH)	-
IKZF1	-	-	High_specificity_DNA-binding_protein	pioneer	Zinc-coordinating_DNA-binding_domains	C2H2_zinc_finger_factors	-
IKZF2	-	Monomer_or_homomultimer	High_specificity_DNA-binding_protein	pioneer	Zinc-coordinating_DNA-binding_domains	C2H2_zinc_finger_factors	-
IKZF3	-	-	High_specificity_DNA-binding_protein	pioneer	Zinc-coordinating_DNA-binding_domains	C2H2_zinc_finger_factors	-
IKZF4	repressors	Monomer_or_homomultimer	High_specificity_DNA-binding_protein	-	Zinc-coordinating_DNA-binding_domains	C2H2_zinc_finger_factors	-
IKZF5	-	Monomer_or_homomultimer	High_specificity_DNA-binding_protein	-	Zinc-coordinating_DNA-binding_domains	C2H2_zinc_finger_factors	no_tissue-specific
INSM1	repressors	Monomer_or_homomultimer	High_specificity_DNA-binding_protein	settler	Zinc-coordinating_DNA-binding_domains	C2H2_zinc_finger_factors	tissue-specific
INSM2	-	Monomer_or_homomultimer	High_specificity_DNA-binding_protein	migrant	Zinc-coordinating_DNA-binding_domains	C2H2_zinc_finger_factors	-
IRF1	dual	Monomer_or_homomultimer	High_specificity_DNA-binding_protein	migrant	Helix-turn-helix_domains	Tryptophan_cluster_factors	-
IRF2	activators	Monomer_or_homomultimer	High_specificity_DNA-binding_protein	migrant	Helix-turn-helix_domains	Tryptophan_cluster_factors	no_tissue-specific
IRF3	activators	-	High_specificity_DNA-binding_protein	migrant	Helix-turn-helix_domains	Tryptophan_cluster_factors	no_tissue-specific
IRF4	activators	Monomer_or_homomultimer	High_specificity_DNA-binding_protein	migrant	Helix-turn-helix_domains	Tryptophan_cluster_factors	-
IRF5	-	Monomer_or_homomultimer	High_specificity_DNA-binding_protein	migrant	Helix-turn-helix_domains	Tryptophan_cluster_factors	-
IRF6	activators	Monomer_or_homomultimer	High_specificity_DNA-binding_protein	migrant	Helix-turn-helix_domains	Tryptophan_cluster_factors	-
IRF7	activators	-	High_specificity_DNA-binding_protein	migrant	Helix-turn-helix_domains	Tryptophan_cluster_factors	no_tissue-specific
IRF8	dual	Monomer_or_homomultimer	High_specificity_DNA-binding_protein	migrant	Helix-turn-helix_domains	Tryptophan_cluster_factors	-
IRF9	activators	Monomer_or_homomultimer	High_specificity_DNA-binding_protein	migrant	Helix-turn-helix_domains	Tryptophan_cluster_factors	no_tissue-specific
IRX1	-	Monomer_or_homomultimer	High_specificity_DNA-binding_protein	migrant	Helix-turn-helix_domains	Homeo_domain_factors	-
IRX2	-	Monomer_or_homomultimer	High_specificity_DNA-binding_protein	migrant	Helix-turn-helix_domains	Homeo_domain_factors	-
IRX3	-	Monomer_or_homomultimer	High_specificity_DNA-binding_protein	migrant	Helix-turn-helix_domains	Homeo_domain_factors	-
IRX4	-	Monomer_or_homomultimer	High_specificity_DNA-binding_protein	migrant	Helix-turn-helix_domains	Homeo_domain_factors	-
IRX5	-	Monomer_or_homomultimer	High_specificity_DNA-binding_protein	migrant	Helix-turn-helix_domains	Homeo_domain_factors	tissue-specific
IRX6	-	Monomer_or_homomultimer	High_specificity_DNA-binding_protein	migrant	Helix-turn-helix_domains	Homeo_domain_factors	-
ISL1	activators	Monomer_or_homomultimer	High_specificity_DNA-binding_protein	migrant	Helix-turn-helix_domains	Homeo_domain_factors	-
ISL2	-	Monomer_or_homomultimer	High_specificity_DNA-binding_protein	migrant	Helix-turn-helix_domains	Homeo_domain_factors	tissue-specific
ISX	-	Monomer_or_homomultimer	High_specificity_DNA-binding_protein	-	Helix-turn-helix_domains	Homeo_domain_factors	tissue-specific
JARID2	repressors	-	Low_specificity_DNA-binding_protein	settler	Helix-turn-helix_domains	ARID_domain_factors	no_tissue-specific
JDP2	-	-	High_specificity_DNA-binding_protein	pioneer	Basic_domains	Basic_leucine_zipper_factors_(bZIP)	no_tissue-specific
JUN	activators	-	High_specificity_DNA-binding_protein	settler	Basic_domains	Basic_leucine_zipper_factors_(bZIP)	no_tissue-specific
JUNB	-	-	High_specificity_DNA-binding_protein	pioneer	Basic_domains	Basic_leucine_zipper_factors_(bZIP)	no_tissue-specific
JUND	-	Monomer_or_homomultimer	High_specificity_DNA-binding_protein	settler	Basic_domains	Basic_leucine_zipper_factors_(bZIP)	no_tissue-specific
KAT5	activators	-	Not_a_DNA_binding_protein	migrant	Zinc-coordinating_DNA-binding_domains	C2HC_zinc_finger_factors	no_tissue-specific
KAT6A	-	-	Not_a_DNA_binding_protein	migrant	Zinc-coordinating_DNA-binding_domains	C2HC_zinc_finger_factors	no_tissue-specific
KAT6B	dual	-	Not_a_DNA_binding_protein	migrant	Zinc-coordinating_DNA-binding_domains	C2HC_zinc_finger_factors	no_tissue-specific
KAT7	-	Monomer_or_homomultimer	High_specificity_DNA-binding_protein	migrant	Zinc-coordinating_DNA-binding_domains	C2HC_zinc_finger_factors	no_tissue-specific
KAT8	activators	-	Not_a_DNA_binding_protein	-	Zinc-coordinating_DNA-binding_domains	C2HC_zinc_finger_factors	no_tissue-specific
KDM2A	-	Monomer_or_homomultimer	High_specificity_DNA-binding_protein	migrant	Zinc-coordinating_DNA-binding_domains	CXXC_zinc_finger_factors	no_tissue-specific
KDM5A	activators	-	Low_specificity_DNA-binding_protein	settler	Helix-turn-helix_domains	ARID_domain_factors	no_tissue-specific
KDM5B	dual	Monomer_or_homomultimer	High_specificity_DNA-binding_protein	settler	Helix-turn-helix_domains	ARID_domain_factors	no_tissue-specific
KDM5C	-	-	Low_specificity_DNA-binding_protein	settler	Helix-turn-helix_domains	ARID_domain_factors	no_tissue-specific
KDM5D	-	-	Low_specificity_DNA-binding_protein	settler	Helix-turn-helix_domains	ARID_domain_factors	-
KLF1	dual	Monomer_or_homomultimer	High_specificity_DNA-binding_protein	pioneer	Zinc-coordinating_DNA-binding_domains	C2H2_zinc_finger_factors	tissue-specific
KLF10	repressors	Monomer_or_homomultimer	High_specificity_DNA-binding_protein	pioneer	Zinc-coordinating_DNA-binding_domains	C2H2_zinc_finger_factors	no_tissue-specific
KLF11	dual	Monomer_or_homomultimer	High_specificity_DNA-binding_protein	pioneer	Zinc-coordinating_DNA-binding_domains	C2H2_zinc_finger_factors	no_tissue-specific
KLF12	repressors	Monomer_or_homomultimer	High_specificity_DNA-binding_protein	pioneer	Zinc-coordinating_DNA-binding_domains	C2H2_zinc_finger_factors	-
KLF13	repressors	Monomer_or_homomultimer	High_specificity_DNA-binding_protein	pioneer	Zinc-coordinating_DNA-binding_domains	C2H2_zinc_finger_factors	no_tissue-specific
KLF14	-	Monomer_or_homomultimer	High_specificity_DNA-binding_protein	pioneer	Zinc-coordinating_DNA-binding_domains	C2H2_zinc_finger_factors	-
KLF15	-	Monomer_or_homomultimer	High_specificity_DNA-binding_protein	pioneer	Zinc-coordinating_DNA-binding_domains	C2H2_zinc_finger_factors	no_tissue-specific
KLF16	-	Monomer_or_homomultimer	High_specificity_DNA-binding_protein	pioneer	Zinc-coordinating_DNA-binding_domains	C2H2_zinc_finger_factors	no_tissue-specific
KLF17	repressors	Monomer_or_homomultimer	High_specificity_DNA-binding_protein	-	Zinc-coordinating_DNA-binding_domains	C2H2_zinc_finger_factors	tissue-specific
KLF2	activators	Monomer_or_homomultimer	High_specificity_DNA-binding_protein	pioneer	Zinc-coordinating_DNA-binding_domains	C2H2_zinc_finger_factors	no_tissue-specific
KLF3	-	Monomer_or_homomultimer	High_specificity_DNA-binding_protein	pioneer	Zinc-coordinating_DNA-binding_domains	C2H2_zinc_finger_factors	no_tissue-specific
KLF4	dual	Monomer_or_homomultimer	High_specificity_DNA-binding_protein	settler	Zinc-coordinating_DNA-binding_domains	C2H2_zinc_finger_factors	no_tissue-specific
KLF5	activators	Monomer_or_homomultimer	High_specificity_DNA-binding_protein	pioneer	Zinc-coordinating_DNA-binding_domains	C2H2_zinc_finger_factors	-
KLF6	activators	Monomer_or_homomultimer	High_specificity_DNA-binding_protein	pioneer	Zinc-coordinating_DNA-binding_domains	C2H2_zinc_finger_factors	no_tissue-specific
KLF7	activators	Monomer_or_homomultimer	High_specificity_DNA-binding_protein	pioneer	Zinc-coordinating_DNA-binding_domains	C2H2_zinc_finger_factors	no_tissue-specific
KLF8	dual	Monomer_or_homomultimer	High_specificity_DNA-binding_protein	pioneer	Zinc-coordinating_DNA-binding_domains	C2H2_zinc_finger_factors	-
KLF9	dual	Monomer_or_homomultimer	High_specificity_DNA-binding_protein	pioneer	Zinc-coordinating_DNA-binding_domains	C2H2_zinc_finger_factors	no_tissue-specific
KMT2A	-	Monomer_or_homomultimer	High_specificity_DNA-binding_protein	migrant	Zinc-coordinating_DNA-binding_domains	CXXC_zinc_finger_factors	no_tissue-specific
KMT2B	-	Monomer_or_homomultimer	High_specificity_DNA-binding_protein	migrant	Zinc-coordinating_DNA-binding_domains	CXXC_zinc_finger_factors	no_tissue-specific
L3MBTL1	-	Monomer_or_homomultimer	High_specificity_DNA-binding_protein	migrant	Zinc-coordinating_DNA-binding_domains	C2HC_zinc_finger_factors	-
LBX1	-	Monomer_or_homomultimer	High_specificity_DNA-binding_protein	migrant	Helix-turn-helix_domains	Homeo_domain_factors	tissue-specific
LBX2	-	Monomer_or_homomultimer	High_specificity_DNA-binding_protein	-	Helix-turn-helix_domains	Homeo_domain_factors	-
LEF1	activators	Monomer_or_homomultimer	High_specificity_DNA-binding_protein	migrant	Other_all--helical_DNA-binding_domains	High-mobility_group_(HMG)_domain_factors	-
LEUTX	-	Monomer_or_homomultimer	High_specificity_DNA-binding_protein	-	Helix-turn-helix_domains	Homeo_domain_factors	-
LHX1	-	Monomer_or_homomultimer	High_specificity_DNA-binding_protein	migrant	Helix-turn-helix_domains	Homeo_domain_factors	tissue-specific
LHX2	activators	Monomer_or_homomultimer	High_specificity_DNA-binding_protein	migrant	Helix-turn-helix_domains	Homeo_domain_factors	tissue-specific
LHX3	activators	Monomer_or_homomultimer	High_specificity_DNA-binding_protein	migrant	Helix-turn-helix_domains	Homeo_domain_factors	tissue-specific
LHX4	-	Monomer_or_homomultimer	High_specificity_DNA-binding_protein	migrant	Helix-turn-helix_domains	Homeo_domain_factors	tissue-specific
LHX5	-	Monomer_or_homomultimer	High_specificity_DNA-binding_protein	migrant	Helix-turn-helix_domains	Homeo_domain_factors	-
LHX6	-	Monomer_or_homomultimer	High_specificity_DNA-binding_protein	migrant	Helix-turn-helix_domains	Homeo_domain_factors	-
LHX8	-	Monomer_or_homomultimer	High_specificity_DNA-binding_protein	-	Helix-turn-helix_domains	Homeo_domain_factors	-
LHX9	-	Monomer_or_homomultimer	High_specificity_DNA-binding_protein	migrant	Helix-turn-helix_domains	Homeo_domain_factors	tissue-specific
LMX1A	activators	Monomer_or_homomultimer	High_specificity_DNA-binding_protein	migrant	Helix-turn-helix_domains	Homeo_domain_factors	-
LMX1B	-	Monomer_or_homomultimer	High_specificity_DNA-binding_protein	migrant	Helix-turn-helix_domains	Homeo_domain_factors	tissue-specific
LRRFIP1	repressors	-	Not_a_DNA_binding_protein	settler	Yet_undefined_DNA-binding_domains	Leucine-rich_repeat_flightless-interacting_proteins	no_tissue-specific
LRRFIP2	-	-	Not_a_DNA_binding_protein	-	Yet_undefined_DNA-binding_domains	Leucine-rich_repeat_flightless-interacting_proteins	no_tissue-specific
LYAR	-	-	Not_a_DNA_binding_protein	-	Zinc-coordinating_DNA-binding_domains	C2HC_zinc_finger_factors	no_tissue-specific
LYL1	-	Obligate_heteromer	High_specificity_DNA-binding_protein	settler	Basic_domains	Basic_helix-loop-helix_factors_(bHLH)	-
MAF	dual	-	High_specificity_DNA-binding_protein	migrant	Basic_domains	Basic_leucine_zipper_factors_(bZIP)	no_tissue-specific
MAFA	activators	Monomer_or_homomultimer	High_specificity_DNA-binding_protein	migrant	Basic_domains	Basic_leucine_zipper_factors_(bZIP)	tissue-specific
MAFB	dual	-	High_specificity_DNA-binding_protein	pioneer	Basic_domains	Basic_leucine_zipper_factors_(bZIP)	no_tissue-specific
MAFF	dual	Monomer_or_homomultimer	High_specificity_DNA-binding_protein	migrant	Basic_domains	Basic_leucine_zipper_factors_(bZIP)	-
MAFG	dual	Monomer_or_homomultimer	High_specificity_DNA-binding_protein	migrant	Basic_domains	Basic_leucine_zipper_factors_(bZIP)	no_tissue-specific
MAFK	dual	Monomer_or_homomultimer	High_specificity_DNA-binding_protein	migrant	Basic_domains	Basic_leucine_zipper_factors_(bZIP)	no_tissue-specific
MAX	dual	-	High_specificity_DNA-binding_protein	settler	Basic_domains	Basic_helix-loop-helix_factors_(bHLH)	no_tissue-specific
MAZ	-	Monomer_or_homomultimer	High_specificity_DNA-binding_protein	pioneer	Zinc-coordinating_DNA-binding_domains	C2H2_zinc_finger_factors	no_tissue-specific
MBD1	repressors	-	Low_specificity_DNA-binding_protein	migrant	Zinc-coordinating_DNA-binding_domains	CXXC_zinc_finger_factors	no_tissue-specific
MECOM	-	Monomer_or_homomultimer	High_specificity_DNA-binding_protein	migrant	Zinc-coordinating_DNA-binding_domains	C2H2_zinc_finger_factors	-
MEF2A	activators	Monomer_or_homomultimer	High_specificity_DNA-binding_protein	migrant		MADS_box_factors	no_tissue-specific
MEF2B	activators	Monomer_or_homomultimer	High_specificity_DNA-binding_protein	migrant		MADS_box_factors	tissue-specific
MEF2C	activators	Monomer_or_homomultimer	High_specificity_DNA-binding_protein	migrant		MADS_box_factors	-
MEF2D	activators	-	High_specificity_DNA-binding_protein	migrant		MADS_box_factors	no_tissue-specific
MEIS1	activators	Monomer_or_homomultimer	High_specificity_DNA-binding_protein	migrant	Helix-turn-helix_domains	Homeo_domain_factors	-
MEIS2	-	Monomer_or_homomultimer	High_specificity_DNA-binding_protein	migrant	Helix-turn-helix_domains	Homeo_domain_factors	-
MEIS3	-	Monomer_or_homomultimer	High_specificity_DNA-binding_protein	migrant	Helix-turn-helix_domains	Homeo_domain_factors	-
MEIS3P1	-	-	-	migrant	Helix-turn-helix_domains	Homeo_domain_factors	-
MEIS3P2	-	-	-	-	Helix-turn-helix_domains	Homeo_domain_factors	-
MEOX1	activators	Monomer_or_homomultimer	High_specificity_DNA-binding_protein	migrant	Helix-turn-helix_domains	Homeo_domain_factors	-
MEOX2	activators	Monomer_or_homomultimer	High_specificity_DNA-binding_protein	migrant	Helix-turn-helix_domains	Homeo_domain_factors	-
MESP1	-	Monomer_or_homomultimer	High_specificity_DNA-binding_protein	-	Basic_domains	Basic_helix-loop-helix_factors_(bHLH)	-
MESP2	-	Monomer_or_homomultimer	High_specificity_DNA-binding_protein	-	Basic_domains	Basic_helix-loop-helix_factors_(bHLH)	-
MGA	dual	Monomer_or_homomultimer	High_specificity_DNA-binding_protein	-	Immunoglobulin_fold	T-Box_factors	-
MIER1	-	-	Not_a_DNA_binding_protein	-	Helix-turn-helix_domains	Tryptophan_cluster_factors	no_tissue-specific
MIER2	-	-	Not_a_DNA_binding_protein	-	Helix-turn-helix_domains	Tryptophan_cluster_factors	no_tissue-specific
MIER3	-	-	Not_a_DNA_binding_protein	-	Helix-turn-helix_domains	Tryptophan_cluster_factors	no_tissue-specific
MITF	activators	-	High_specificity_DNA-binding_protein	settler	Basic_domains	Basic_helix-loop-helix_factors_(bHLH)	-
MIXL1	activators	Monomer_or_homomultimer	High_specificity_DNA-binding_protein	migrant	Helix-turn-helix_domains	Homeo_domain_factors	-
MKX	-	Monomer_or_homomultimer	High_specificity_DNA-binding_protein	migrant	Helix-turn-helix_domains	Homeo_domain_factors	-
MLX	dual	-	High_specificity_DNA-binding_protein	settler	Basic_domains	Basic_helix-loop-helix_factors_(bHLH)	no_tissue-specific
MLXIP	activators	-	High_specificity_DNA-binding_protein	settler	Basic_domains	Basic_helix-loop-helix_factors_(bHLH)	no_tissue-specific
MLXIPL	repressors	-	High_specificity_DNA-binding_protein	settler	Basic_domains	Basic_helix-loop-helix_factors_(bHLH)	-
MNT	repressors	-	High_specificity_DNA-binding_protein	settler	Basic_domains	Basic_helix-loop-helix_factors_(bHLH)	no_tissue-specific
MNX1	-	Monomer_or_homomultimer	High_specificity_DNA-binding_protein	migrant	Helix-turn-helix_domains	Homeo_domain_factors	tissue-specific
MSC	repressors	-	High_specificity_DNA-binding_protein	settler	Basic_domains	Basic_helix-loop-helix_factors_(bHLH)	-
MSGN1	-	Monomer_or_homomultimer	High_specificity_DNA-binding_protein	-	Basic_domains	Basic_helix-loop-helix_factors_(bHLH)	-
MSX1	repressors	Monomer_or_homomultimer	High_specificity_DNA-binding_protein	migrant	Helix-turn-helix_domains	Homeo_domain_factors	-
MSX2	-	Monomer_or_homomultimer	High_specificity_DNA-binding_protein	migrant	Helix-turn-helix_domains	Homeo_domain_factors	-
MTA1	dual	-	Low_specificity_DNA-binding_protein	migrant	Helix-turn-helix_domains	Tryptophan_cluster_factors	no_tissue-specific
MTA2	dual	-	Low_specificity_DNA-binding_protein	migrant	Helix-turn-helix_domains	Tryptophan_cluster_factors	no_tissue-specific
MTA3	repressors	-	Low_specificity_DNA-binding_protein	migrant	Helix-turn-helix_domains	Tryptophan_cluster_factors	-
MTF1	activators	Monomer_or_homomultimer	High_specificity_DNA-binding_protein	migrant	Zinc-coordinating_DNA-binding_domains	C2H2_zinc_finger_factors	no_tissue-specific
MXD1	repressors	Obligate_heteromer	High_specificity_DNA-binding_protein	settler	Basic_domains	Basic_helix-loop-helix_factors_(bHLH)	no_tissue-specific
MXD3	repressors	Obligate_heteromer	High_specificity_DNA-binding_protein	settler	Basic_domains	Basic_helix-loop-helix_factors_(bHLH)	-
MXD4	-	Obligate_heteromer	High_specificity_DNA-binding_protein	settler	Basic_domains	Basic_helix-loop-helix_factors_(bHLH)	no_tissue-specific
MXI1	repressors	Obligate_heteromer	High_specificity_DNA-binding_protein	settler	Basic_domains	Basic_helix-loop-helix_factors_(bHLH)	no_tissue-specific
MYB	activators	Monomer_or_homomultimer	High_specificity_DNA-binding_protein	settler	Helix-turn-helix_domains	Tryptophan_cluster_factors	tissue-specific
MYBL1	activators	Monomer_or_homomultimer	High_specificity_DNA-binding_protein	settler	Helix-turn-helix_domains	Tryptophan_cluster_factors	-
MYBL2	activators	Monomer_or_homomultimer	High_specificity_DNA-binding_protein	migrant	Helix-turn-helix_domains	Tryptophan_cluster_factors	-
MYC	activators	Obligate_heteromer	High_specificity_DNA-binding_protein	settler	Basic_domains	Basic_helix-loop-helix_factors_(bHLH)	no_tissue-specific
MYCL	-	Obligate_heteromer	High_specificity_DNA-binding_protein	-	Basic_domains	Basic_helix-loop-helix_factors_(bHLH)	-
MYCLP1	-	Obligate_heteromer	-	-	Basic_domains	Basic_helix-loop-helix_factors_(bHLH)	-
MYCN	-	-	High_specificity_DNA-binding_protein	settler	Basic_domains	Basic_helix-loop-helix_factors_(bHLH)	-
MYF5	activators	Monomer_or_homomultimer	High_specificity_DNA-binding_protein	settler	Basic_domains	Basic_helix-loop-helix_factors_(bHLH)	-
MYF6	-	Monomer_or_homomultimer	High_specificity_DNA-binding_protein	migrant	Basic_domains	Basic_helix-loop-helix_factors_(bHLH)	tissue-specific
MYNN	-	Monomer_or_homomultimer	High_specificity_DNA-binding_protein	pioneer	Zinc-coordinating_DNA-binding_domains	C2H2_zinc_finger_factors	no_tissue-specific
MYOD1	activators	Monomer_or_homomultimer	High_specificity_DNA-binding_protein	settler	Basic_domains	Basic_helix-loop-helix_factors_(bHLH)	tissue-specific
MYOG	activators	-	High_specificity_DNA-binding_protein	settler	Basic_domains	Basic_helix-loop-helix_factors_(bHLH)	tissue-specific
MYRF	activators	Monomer_or_homomultimer	High_specificity_DNA-binding_protein	-	Immunoglobulin_fold	NDT80_domain_factors	-
MYT1	-	Monomer_or_homomultimer	High_specificity_DNA-binding_protein	migrant	Zinc-coordinating_DNA-binding_domains	C2HC_zinc_finger_factors	tissue-specific
MYT1L	repressors	Monomer_or_homomultimer	High_specificity_DNA-binding_protein	migrant	Zinc-coordinating_DNA-binding_domains	C2HC_zinc_finger_factors	-
MZF1	-	Monomer_or_homomultimer	High_specificity_DNA-binding_protein	migrant	Zinc-coordinating_DNA-binding_domains	C2H2_zinc_finger_factors	no_tissue-specific
NANOG	dual	Monomer_or_homomultimer	High_specificity_DNA-binding_protein	migrant	Helix-turn-helix_domains	Homeo_domain_factors	-
NANOGNB	-	Monomer_or_homomultimer	High_specificity_DNA-binding_protein	migrant	Helix-turn-helix_domains	Homeo_domain_factors	-
NANOGP1	-	-	-	-	Helix-turn-helix_domains	Homeo_domain_factors	-
NANOGP8	-	Monomer_or_homomultimer	High_specificity_DNA-binding_protein	-	Helix-turn-helix_domains	Homeo_domain_factors	-
NCOA1	-	Obligate_heteromer	High_specificity_DNA-binding_protein	settler	Basic_domains	Basic_helix-loop-helix_factors_(bHLH)	no_tissue-specific
NCOA2	-	Obligate_heteromer	High_specificity_DNA-binding_protein	settler	Basic_domains	Basic_helix-loop-helix_factors_(bHLH)	no_tissue-specific
NCOA3	-	Obligate_heteromer	High_specificity_DNA-binding_protein	settler	Basic_domains	Basic_helix-loop-helix_factors_(bHLH)	no_tissue-specific
NCOR1	repressors	-	Not_a_DNA_binding_protein	migrant	Helix-turn-helix_domains	Tryptophan_cluster_factors	no_tissue-specific
NCOR2	repressors	-	Not_a_DNA_binding_protein	migrant	Helix-turn-helix_domains	Tryptophan_cluster_factors	no_tissue-specific
NEUROD1	activators	-	High_specificity_DNA-binding_protein	settler	Basic_domains	Basic_helix-loop-helix_factors_(bHLH)	-
NEUROD2	-	Monomer_or_homomultimer	High_specificity_DNA-binding_protein	settler	Basic_domains	Basic_helix-loop-helix_factors_(bHLH)	-
NEUROD4	activators	Monomer_or_homomultimer	High_specificity_DNA-binding_protein	settler	Basic_domains	Basic_helix-loop-helix_factors_(bHLH)	tissue-specific
NEUROD6	activators	Monomer_or_homomultimer	High_specificity_DNA-binding_protein	settler	Basic_domains	Basic_helix-loop-helix_factors_(bHLH)	-
NEUROG1	activators	Monomer_or_homomultimer	High_specificity_DNA-binding_protein	settler	Basic_domains	Basic_helix-loop-helix_factors_(bHLH)	-
NEUROG2	activators	Monomer_or_homomultimer	High_specificity_DNA-binding_protein	settler	Basic_domains	Basic_helix-loop-helix_factors_(bHLH)	-
NEUROG3	activators	Monomer_or_homomultimer	High_specificity_DNA-binding_protein	settler	Basic_domains	Basic_helix-loop-helix_factors_(bHLH)	-
NFAT5	activators	Monomer_or_homomultimer	High_specificity_DNA-binding_protein	migrant	Immunoglobulin_fold	Rel_homology_region_(RHR)_factors	no_tissue-specific
NFATC1	activators	Monomer_or_homomultimer	High_specificity_DNA-binding_protein	migrant	Immunoglobulin_fold	Rel_homology_region_(RHR)_factors	-
NFATC2	activators	Monomer_or_homomultimer	High_specificity_DNA-binding_protein	migrant	Immunoglobulin_fold	Rel_homology_region_(RHR)_factors	-
NFATC3	activators	Monomer_or_homomultimer	High_specificity_DNA-binding_protein	migrant	Immunoglobulin_fold	Rel_homology_region_(RHR)_factors	-
NFATC4	-	Monomer_or_homomultimer	High_specificity_DNA-binding_protein	migrant	Immunoglobulin_fold	Rel_homology_region_(RHR)_factors	-
NFE2	-	-	High_specificity_DNA-binding_protein	-	Basic_domains	Basic_leucine_zipper_factors_(bZIP)	-
NFE2L1	activators	Obligate_heteromer	High_specificity_DNA-binding_protein	pioneer	Basic_domains	Basic_leucine_zipper_factors_(bZIP)	no_tissue-specific
NFE2L2	activators	Obligate_heteromer	High_specificity_DNA-binding_protein	migrant	Basic_domains	Basic_leucine_zipper_factors_(bZIP)	no_tissue-specific
NFE2L3	activators	Obligate_heteromer	High_specificity_DNA-binding_protein	settler	Basic_domains	Basic_leucine_zipper_factors_(bZIP)	-
NFIA	activators	Monomer_or_homomultimer	High_specificity_DNA-binding_protein	-		SMAD/NF-1_DNA-binding_domain_factors	no_tissue-specific
NFIB	activators	Monomer_or_homomultimer	High_specificity_DNA-binding_protein	-		SMAD/NF-1_DNA-binding_domain_factors	no_tissue-specific
NFIC	activators	Monomer_or_homomultimer	High_specificity_DNA-binding_protein	-		SMAD/NF-1_DNA-binding_domain_factors	no_tissue-specific
NFIL3	dual	Monomer_or_homomultimer	High_specificity_DNA-binding_protein	migrant	Basic_domains	Basic_leucine_zipper_factors_(bZIP)	no_tissue-specific
NFIX	activators	Monomer_or_homomultimer	High_specificity_DNA-binding_protein	-		SMAD/NF-1_DNA-binding_domain_factors	no_tissue-specific
NFKB1	activators	Monomer_or_homomultimer	High_specificity_DNA-binding_protein	migrant	Immunoglobulin_fold	Rel_homology_region_(RHR)_factors	no_tissue-specific
NFKB2	repressors	Monomer_or_homomultimer	High_specificity_DNA-binding_protein	migrant	Immunoglobulin_fold	Rel_homology_region_(RHR)_factors	no_tissue-specific
NFKBIA	-	-	Not_a_DNA_binding_protein	settler	Immunoglobulin_fold	Rel_homology_region_(RHR)_factors	no_tissue-specific
NFKBIB	-	-	Not_a_DNA_binding_protein	migrant	Immunoglobulin_fold	Rel_homology_region_(RHR)_factors	no_tissue-specific
NFKBID	-	-	Not_a_DNA_binding_protein	-	Immunoglobulin_fold	Rel_homology_region_(RHR)_factors	-
NFKBIE	-	-	-	-	Immunoglobulin_fold	Rel_homology_region_(RHR)_factors	no_tissue-specific
NFKBIL1	-	-	Not_a_DNA_binding_protein	migrant	Immunoglobulin_fold	Rel_homology_region_(RHR)_factors	no_tissue-specific
NFKBIZ	-	-	Not_a_DNA_binding_protein	migrant	Immunoglobulin_fold	Rel_homology_region_(RHR)_factors	no_tissue-specific
NFX1	dual	Monomer_or_homomultimer	High_specificity_DNA-binding_protein	pioneer	Yet_undefined_DNA-binding_domains	NFX1-type_putative_zinc_finger_factors	no_tissue-specific
NFXL1	-	Monomer_or_homomultimer	High_specificity_DNA-binding_protein	settler	Yet_undefined_DNA-binding_domains	NFX1-type_putative_zinc_finger_factors	no_tissue-specific
NFYA	dual	Obligate_heteromer	High_specificity_DNA-binding_protein	pioneer	Other_all--helical_DNA-binding_domains	Heteromeric_CCAAT-binding_factors	no_tissue-specific
NFYB	dual	Obligate_heteromer	High_specificity_DNA-binding_protein	pioneer	Other_all--helical_DNA-binding_domains	Heteromeric_CCAAT-binding_factors	no_tissue-specific
NFYC	dual	Obligate_heteromer	High_specificity_DNA-binding_protein	pioneer	Other_all--helical_DNA-binding_domains	Heteromeric_CCAAT-binding_factors	no_tissue-specific
NHLH1	-	Monomer_or_homomultimer	High_specificity_DNA-binding_protein	pioneer	Basic_domains	Basic_helix-loop-helix_factors_(bHLH)	-
NHLH2	-	Monomer_or_homomultimer	High_specificity_DNA-binding_protein	settler	Basic_domains	Basic_helix-loop-helix_factors_(bHLH)	-
NKX1-1	-	Monomer_or_homomultimer	High_specificity_DNA-binding_protein	-	Helix-turn-helix_domains	Homeo_domain_factors	-
NKX1-2	-	Monomer_or_homomultimer	High_specificity_DNA-binding_protein	-	Helix-turn-helix_domains	Homeo_domain_factors	-
NKX2-1	dual	Monomer_or_homomultimer	High_specificity_DNA-binding_protein	migrant	Helix-turn-helix_domains	Homeo_domain_factors	tissue-specific
NKX2-2	activators	Monomer_or_homomultimer	High_specificity_DNA-binding_protein	migrant	Helix-turn-helix_domains	Homeo_domain_factors	tissue-specific
NKX2-3	-	Monomer_or_homomultimer	High_specificity_DNA-binding_protein	migrant	Helix-turn-helix_domains	Homeo_domain_factors	-
NKX2-4	-	Monomer_or_homomultimer	High_specificity_DNA-binding_protein	-	Helix-turn-helix_domains	Homeo_domain_factors	tissue-specific
NKX2-5	dual	Monomer_or_homomultimer	High_specificity_DNA-binding_protein	migrant	Helix-turn-helix_domains	Homeo_domain_factors	tissue-specific
NKX2-6	activators	Monomer_or_homomultimer	High_specificity_DNA-binding_protein	-	Helix-turn-helix_domains	Homeo_domain_factors	-
NKX2-8	-	Monomer_or_homomultimer	High_specificity_DNA-binding_protein	migrant	Helix-turn-helix_domains	Homeo_domain_factors	tissue-specific
NKX3-1	repressors	Monomer_or_homomultimer	High_specificity_DNA-binding_protein	migrant	Helix-turn-helix_domains	Homeo_domain_factors	-
NKX3-2	-	Monomer_or_homomultimer	High_specificity_DNA-binding_protein	migrant	Helix-turn-helix_domains	Homeo_domain_factors	tissue-specific
NKX6-1	-	Monomer_or_homomultimer	High_specificity_DNA-binding_protein	migrant	Helix-turn-helix_domains	Homeo_domain_factors	-
NKX6-2	repressors	Monomer_or_homomultimer	High_specificity_DNA-binding_protein	migrant	Helix-turn-helix_domains	Homeo_domain_factors	tissue-specific
NKX6-3	-	Monomer_or_homomultimer	High_specificity_DNA-binding_protein	migrant	Helix-turn-helix_domains	Homeo_domain_factors	-
NOBOX	-	Monomer_or_homomultimer	High_specificity_DNA-binding_protein	-	Helix-turn-helix_domains	Homeo_domain_factors	-
NONO	activators	-	Not_a_DNA_binding_protein	settler	Yet_undefined_DNA-binding_domains	NonO_domain_factors	no_tissue-specific
NOTO	-	Monomer_or_homomultimer	High_specificity_DNA-binding_protein	-	Helix-turn-helix_domains	Homeo_domain_factors	-
NPAS1	-	Obligate_heteromer	High_specificity_DNA-binding_protein	settler	Basic_domains	Basic_helix-loop-helix_factors_(bHLH)	tissue-specific
NPAS2	activators	-	High_specificity_DNA-binding_protein	settler	Basic_domains	Basic_helix-loop-helix_factors_(bHLH)	-
NPAS3	-	Obligate_heteromer	High_specificity_DNA-binding_protein	settler	Basic_domains	Basic_helix-loop-helix_factors_(bHLH)	tissue-specific
NPAS4	activators	Obligate_heteromer	High_specificity_DNA-binding_protein	-	Basic_domains	Basic_helix-loop-helix_factors_(bHLH)	-
NR0B1	-	Obligate_heteromer	High_specificity_DNA-binding_protein	migrant	Zinc-coordinating_DNA-binding_domains	Nuclear_receptors_with_C4_zinc_fingers	-
NR0B2	-	-	Not_a_DNA_binding_protein	migrant	Zinc-coordinating_DNA-binding_domains	Nuclear_receptors_with_C4_zinc_fingers	-
NR1D1	-	Monomer_or_homomultimer	High_specificity_DNA-binding_protein	migrant	Zinc-coordinating_DNA-binding_domains	Nuclear_receptors_with_C4_zinc_fingers	no_tissue-specific
NR1D2	-	Monomer_or_homomultimer	High_specificity_DNA-binding_protein	migrant	Zinc-coordinating_DNA-binding_domains	Nuclear_receptors_with_C4_zinc_fingers	no_tissue-specific
NR1H2	activators	Obligate_heteromer	High_specificity_DNA-binding_protein	migrant	Zinc-coordinating_DNA-binding_domains	Nuclear_receptors_with_C4_zinc_fingers	no_tissue-specific
NR1H3	activators	Obligate_heteromer	High_specificity_DNA-binding_protein	migrant	Zinc-coordinating_DNA-binding_domains	Nuclear_receptors_with_C4_zinc_fingers	no_tissue-specific
NR1H4	activators	-	High_specificity_DNA-binding_protein	migrant	Zinc-coordinating_DNA-binding_domains	Nuclear_receptors_with_C4_zinc_fingers	-
NR1I2	activators	-	High_specificity_DNA-binding_protein	migrant	Zinc-coordinating_DNA-binding_domains	Nuclear_receptors_with_C4_zinc_fingers	tissue-specific
NR1I3	activators	Monomer_or_homomultimer	High_specificity_DNA-binding_protein	migrant	Zinc-coordinating_DNA-binding_domains	Nuclear_receptors_with_C4_zinc_fingers	tissue-specific
NR2C1	repressors	-	High_specificity_DNA-binding_protein	migrant	Zinc-coordinating_DNA-binding_domains	Nuclear_receptors_with_C4_zinc_fingers	no_tissue-specific
NR2C2	activators	-	High_specificity_DNA-binding_protein	migrant	Zinc-coordinating_DNA-binding_domains	Nuclear_receptors_with_C4_zinc_fingers	no_tissue-specific
NR2E1	-	Monomer_or_homomultimer	High_specificity_DNA-binding_protein	migrant	Zinc-coordinating_DNA-binding_domains	Nuclear_receptors_with_C4_zinc_fingers	-
NR2E3	dual	Monomer_or_homomultimer	High_specificity_DNA-binding_protein	migrant	Zinc-coordinating_DNA-binding_domains	Nuclear_receptors_with_C4_zinc_fingers	-
NR2F1	activators	-	High_specificity_DNA-binding_protein	migrant	Zinc-coordinating_DNA-binding_domains	Nuclear_receptors_with_C4_zinc_fingers	-
NR2F2	-	-	High_specificity_DNA-binding_protein	pioneer	Zinc-coordinating_DNA-binding_domains	Nuclear_receptors_with_C4_zinc_fingers	no_tissue-specific
NR2F6	repressors	-	High_specificity_DNA-binding_protein	migrant	Zinc-coordinating_DNA-binding_domains	Nuclear_receptors_with_C4_zinc_fingers	no_tissue-specific
NR3C1	dual	-	High_specificity_DNA-binding_protein	migrant	Zinc-coordinating_DNA-binding_domains	Nuclear_receptors_with_C4_zinc_fingers	no_tissue-specific
NR3C2	activators	-	High_specificity_DNA-binding_protein	migrant	Zinc-coordinating_DNA-binding_domains	Nuclear_receptors_with_C4_zinc_fingers	no_tissue-specific
NR4A1	-	Monomer_or_homomultimer	High_specificity_DNA-binding_protein	migrant	Zinc-coordinating_DNA-binding_domains	Nuclear_receptors_with_C4_zinc_fingers	no_tissue-specific
NR4A2	-	Monomer_or_homomultimer	High_specificity_DNA-binding_protein	migrant	Zinc-coordinating_DNA-binding_domains	Nuclear_receptors_with_C4_zinc_fingers	-
NR4A3	activators	Monomer_or_homomultimer	High_specificity_DNA-binding_protein	migrant	Zinc-coordinating_DNA-binding_domains	Nuclear_receptors_with_C4_zinc_fingers	-
NR5A1	activators	Monomer_or_homomultimer	High_specificity_DNA-binding_protein	migrant	Zinc-coordinating_DNA-binding_domains	Nuclear_receptors_with_C4_zinc_fingers	-
NR5A2	-	Monomer_or_homomultimer	High_specificity_DNA-binding_protein	migrant	Zinc-coordinating_DNA-binding_domains	Nuclear_receptors_with_C4_zinc_fingers	-
NR6A1	-	Monomer_or_homomultimer	High_specificity_DNA-binding_protein	-	Zinc-coordinating_DNA-binding_domains	Nuclear_receptors_with_C4_zinc_fingers	-
NRF1	activators	Monomer_or_homomultimer	High_specificity_DNA-binding_protein	settler	Yet_undefined_DNA-binding_domains	Uncharacterized	no_tissue-specific
NRL	activators	Monomer_or_homomultimer	High_specificity_DNA-binding_protein	migrant	Basic_domains	Basic_leucine_zipper_factors_(bZIP)	tissue-specific
NSD2	-	-	Low_specificity_DNA-binding_protein	-	-	-	-
OLIG1	-	Monomer_or_homomultimer	High_specificity_DNA-binding_protein	-	Basic_domains	Basic_helix-loop-helix_factors_(bHLH)	tissue-specific
OLIG2	-	Monomer_or_homomultimer	High_specificity_DNA-binding_protein	-	Basic_domains	Basic_helix-loop-helix_factors_(bHLH)	tissue-specific
OLIG3	-	Monomer_or_homomultimer	High_specificity_DNA-binding_protein	-	Basic_domains	Basic_helix-loop-helix_factors_(bHLH)	-
ONECUT1	activators	Monomer_or_homomultimer	High_specificity_DNA-binding_protein	migrant	Helix-turn-helix_domains	Homeo_domain_factors	-
ONECUT2	activators	Monomer_or_homomultimer	High_specificity_DNA-binding_protein	migrant	Helix-turn-helix_domains	Homeo_domain_factors	tissue-specific
ONECUT3	activators	Monomer_or_homomultimer	High_specificity_DNA-binding_protein	-	Helix-turn-helix_domains	Homeo_domain_factors	-
OSR1	-	Monomer_or_homomultimer	High_specificity_DNA-binding_protein	-	Zinc-coordinating_DNA-binding_domains	C2H2_zinc_finger_factors	-
OSR2	-	Monomer_or_homomultimer	High_specificity_DNA-binding_protein	-	Zinc-coordinating_DNA-binding_domains	C2H2_zinc_finger_factors	-
OTP	-	Monomer_or_homomultimer	High_specificity_DNA-binding_protein	-	Helix-turn-helix_domains	Homeo_domain_factors	-
OTX1	-	Monomer_or_homomultimer	High_specificity_DNA-binding_protein	migrant	Helix-turn-helix_domains	Homeo_domain_factors	tissue-specific
OTX2	-	Monomer_or_homomultimer	High_specificity_DNA-binding_protein	migrant	Helix-turn-helix_domains	Homeo_domain_factors	-
OVOL1	-	Monomer_or_homomultimer	High_specificity_DNA-binding_protein	migrant	Zinc-coordinating_DNA-binding_domains	C2H2_zinc_finger_factors	-
OVOL2	repressors	Monomer_or_homomultimer	High_specificity_DNA-binding_protein	migrant	Zinc-coordinating_DNA-binding_domains	C2H2_zinc_finger_factors	-
OVOL3	-	Monomer_or_homomultimer	High_specificity_DNA-binding_protein	-	Zinc-coordinating_DNA-binding_domains	C2H2_zinc_finger_factors	tissue-specific
PATZ1	repressors	Monomer_or_homomultimer	High_specificity_DNA-binding_protein	pioneer	Zinc-coordinating_DNA-binding_domains	C2H2_zinc_finger_factors	no_tissue-specific
PAX1	-	Monomer_or_homomultimer	High_specificity_DNA-binding_protein	settler	Helix-turn-helix_domains	Paired_box_factors	-
PAX2	-	Monomer_or_homomultimer	High_specificity_DNA-binding_protein	migrant	Helix-turn-helix_domains	Paired_box_factors	tissue-specific
PAX3	activators	-	High_specificity_DNA-binding_protein	migrant	Helix-turn-helix_domains	Paired_box_factors	tissue-specific
PAX4	-	Monomer_or_homomultimer	High_specificity_DNA-binding_protein	migrant	Helix-turn-helix_domains	Paired_box_factors	-
PAX5	-	Monomer_or_homomultimer	High_specificity_DNA-binding_protein	settler	Helix-turn-helix_domains	Paired_box_factors	tissue-specific
PAX6	-	Monomer_or_homomultimer	High_specificity_DNA-binding_protein	migrant	Helix-turn-helix_domains	Paired_box_factors	tissue-specific
PAX7	-	-	High_specificity_DNA-binding_protein	migrant	Helix-turn-helix_domains	Paired_box_factors	-
PAX8	-	Monomer_or_homomultimer	High_specificity_DNA-binding_protein	migrant	Helix-turn-helix_domains	Paired_box_factors	-
PAX9	-	Monomer_or_homomultimer	High_specificity_DNA-binding_protein	migrant	Helix-turn-helix_domains	Paired_box_factors	tissue-specific
PBRM1	dual	-	Low_specificity_DNA-binding_protein	migrant	Other_all--helical_DNA-binding_domains	High-mobility_group_(HMG)_domain_factors	no_tissue-specific
PBX1	dual	-	High_specificity_DNA-binding_protein	migrant	Helix-turn-helix_domains	Homeo_domain_factors	-
PBX2	activators	Monomer_or_homomultimer	High_specificity_DNA-binding_protein	migrant	Helix-turn-helix_domains	Homeo_domain_factors	no_tissue-specific
PBX3	activators	Monomer_or_homomultimer	High_specificity_DNA-binding_protein	migrant	Helix-turn-helix_domains	Homeo_domain_factors	no_tissue-specific
PBX4	-	Monomer_or_homomultimer	High_specificity_DNA-binding_protein	migrant	Helix-turn-helix_domains	Homeo_domain_factors	-
PDX1	-	Monomer_or_homomultimer	High_specificity_DNA-binding_protein	migrant	Helix-turn-helix_domains	Homeo_domain_factors	tissue-specific
PEG3	-	Monomer_or_homomultimer	High_specificity_DNA-binding_protein	settler	Zinc-coordinating_DNA-binding_domains	C2H2_zinc_finger_factors	-
PGR	dual	Monomer_or_homomultimer	High_specificity_DNA-binding_protein	migrant	Zinc-coordinating_DNA-binding_domains	Nuclear_receptors_with_C4_zinc_fingers	-
PHF5A	-	-	Not_a_DNA_binding_protein	settler	Yet_undefined_DNA-binding_domains	Uncharacterized	no_tissue-specific
PHOX2A	activators	Monomer_or_homomultimer	High_specificity_DNA-binding_protein	migrant	Helix-turn-helix_domains	Homeo_domain_factors	-
PHOX2B	-	Monomer_or_homomultimer	High_specificity_DNA-binding_protein	migrant	Helix-turn-helix_domains	Homeo_domain_factors	-
PHTF1	-	-	Not_a_DNA_binding_protein	migrant	Helix-turn-helix_domains	Homeo_domain_factors	-
PHTF2	-	-	Not_a_DNA_binding_protein	-	Helix-turn-helix_domains	Homeo_domain_factors	-
PITX1	-	Monomer_or_homomultimer	High_specificity_DNA-binding_protein	migrant	Helix-turn-helix_domains	Homeo_domain_factors	-
PITX2	-	Monomer_or_homomultimer	High_specificity_DNA-binding_protein	migrant	Helix-turn-helix_domains	Homeo_domain_factors	-
PITX3	-	Monomer_or_homomultimer	High_specificity_DNA-binding_protein	migrant	Helix-turn-helix_domains	Homeo_domain_factors	tissue-specific
PKNOX1	-	Monomer_or_homomultimer	High_specificity_DNA-binding_protein	migrant	Helix-turn-helix_domains	Homeo_domain_factors	no_tissue-specific
PKNOX2	-	Monomer_or_homomultimer	High_specificity_DNA-binding_protein	migrant	Helix-turn-helix_domains	Homeo_domain_factors	-
PLAG1	-	Monomer_or_homomultimer	High_specificity_DNA-binding_protein	settler	Zinc-coordinating_DNA-binding_domains	C2H2_zinc_finger_factors	-
PLAGL1	-	Monomer_or_homomultimer	High_specificity_DNA-binding_protein	pioneer	Zinc-coordinating_DNA-binding_domains	C2H2_zinc_finger_factors	-
PLAGL2	-	Monomer_or_homomultimer	High_specificity_DNA-binding_protein	pioneer	Zinc-coordinating_DNA-binding_domains	C2H2_zinc_finger_factors	no_tissue-specific
POGZ	-	-	Low_specificity_DNA-binding_protein	-	Zinc-coordinating_DNA-binding_domains	C2H2_zinc_finger_factors	no_tissue-specific
POU1F1	-	Monomer_or_homomultimer	High_specificity_DNA-binding_protein	migrant	Helix-turn-helix_domains	Homeo_domain_factors	tissue-specific
POU2F1	-	Monomer_or_homomultimer	High_specificity_DNA-binding_protein	migrant	Helix-turn-helix_domains	Homeo_domain_factors	-
POU2F2	-	Monomer_or_homomultimer	High_specificity_DNA-binding_protein	migrant	Helix-turn-helix_domains	Homeo_domain_factors	-
POU2F3	-	Monomer_or_homomultimer	High_specificity_DNA-binding_protein	migrant	Helix-turn-helix_domains	Homeo_domain_factors	tissue-specific
POU3F1	-	Monomer_or_homomultimer	High_specificity_DNA-binding_protein	migrant	Helix-turn-helix_domains	Homeo_domain_factors	tissue-specific
POU3F2	-	Monomer_or_homomultimer	High_specificity_DNA-binding_protein	migrant	Helix-turn-helix_domains	Homeo_domain_factors	tissue-specific
POU3F3	-	Monomer_or_homomultimer	High_specificity_DNA-binding_protein	migrant	Helix-turn-helix_domains	Homeo_domain_factors	tissue-specific
POU3F4	-	Monomer_or_homomultimer	High_specificity_DNA-binding_protein	migrant	Helix-turn-helix_domains	Homeo_domain_factors	-
POU4F1	-	Monomer_or_homomultimer	High_specificity_DNA-binding_protein	migrant	Helix-turn-helix_domains	Homeo_domain_factors	-
POU4F2	dual	Monomer_or_homomultimer	High_specificity_DNA-binding_protein	migrant	Helix-turn-helix_domains	Homeo_domain_factors	-
POU4F3	activators	Monomer_or_homomultimer	High_specificity_DNA-binding_protein	migrant	Helix-turn-helix_domains	Homeo_domain_factors	-
POU5F1	-	Monomer_or_homomultimer	High_specificity_DNA-binding_protein	migrant	Helix-turn-helix_domains	Homeo_domain_factors	-
POU5F1B	activators	Monomer_or_homomultimer	High_specificity_DNA-binding_protein	migrant	Helix-turn-helix_domains	Homeo_domain_factors	-
POU5F2	-	Monomer_or_homomultimer	High_specificity_DNA-binding_protein	migrant	Helix-turn-helix_domains	Homeo_domain_factors	tissue-specific
POU6F1	-	Monomer_or_homomultimer	High_specificity_DNA-binding_protein	migrant	Helix-turn-helix_domains	Homeo_domain_factors	no_tissue-specific
POU6F2	-	Monomer_or_homomultimer	High_specificity_DNA-binding_protein	migrant	Helix-turn-helix_domains	Homeo_domain_factors	-
PPARA	activators	-	High_specificity_DNA-binding_protein	migrant	Zinc-coordinating_DNA-binding_domains	Nuclear_receptors_with_C4_zinc_fingers	no_tissue-specific
PPARD	activators	-	High_specificity_DNA-binding_protein	migrant	Zinc-coordinating_DNA-binding_domains	Nuclear_receptors_with_C4_zinc_fingers	no_tissue-specific
PPARG	activators	-	High_specificity_DNA-binding_protein	migrant	Zinc-coordinating_DNA-binding_domains	Nuclear_receptors_with_C4_zinc_fingers	-
PPP1R13L	-	-	Not_a_DNA_binding_protein	-	Immunoglobulin_fold	Rel_homology_region_(RHR)_factors	-
PRDM1	-	Monomer_or_homomultimer	High_specificity_DNA-binding_protein	pioneer	Zinc-coordinating_DNA-binding_domains	C2H2_zinc_finger_factors	-
PRDM10	-	Monomer_or_homomultimer	High_specificity_DNA-binding_protein	settler	Zinc-coordinating_DNA-binding_domains	C2H2_zinc_finger_factors	-
PRDM13	-	Monomer_or_homomultimer	High_specificity_DNA-binding_protein	pioneer	Zinc-coordinating_DNA-binding_domains	C2H2_zinc_finger_factors	-
PRDM14	dual	Monomer_or_homomultimer	High_specificity_DNA-binding_protein	pioneer	Zinc-coordinating_DNA-binding_domains	C2H2_zinc_finger_factors	-
PRDM15	-	Monomer_or_homomultimer	High_specificity_DNA-binding_protein	-	Zinc-coordinating_DNA-binding_domains	C2H2_zinc_finger_factors	-
PRDM16	-	Monomer_or_homomultimer	High_specificity_DNA-binding_protein	settler	Zinc-coordinating_DNA-binding_domains	C2H2_zinc_finger_factors	-
PRDM2	activators	Monomer_or_homomultimer	High_specificity_DNA-binding_protein	settler	Zinc-coordinating_DNA-binding_domains	C2H2_zinc_finger_factors	no_tissue-specific
PRDM4	-	Monomer_or_homomultimer	High_specificity_DNA-binding_protein	pioneer	Zinc-coordinating_DNA-binding_domains	C2H2_zinc_finger_factors	no_tissue-specific
PRDM5	repressors	Monomer_or_homomultimer	High_specificity_DNA-binding_protein	pioneer	Zinc-coordinating_DNA-binding_domains	C2H2_zinc_finger_factors	-
PRDM6	-	Monomer_or_homomultimer	High_specificity_DNA-binding_protein	pioneer	Zinc-coordinating_DNA-binding_domains	C2H2_zinc_finger_factors	-
PRDM8	-	Monomer_or_homomultimer	High_specificity_DNA-binding_protein	settler	Zinc-coordinating_DNA-binding_domains	C2H2_zinc_finger_factors	-
PRDM9	activators	Monomer_or_homomultimer	High_specificity_DNA-binding_protein	settler	Zinc-coordinating_DNA-binding_domains	C2H2_zinc_finger_factors	tissue-specific
PROP1	-	Monomer_or_homomultimer	High_specificity_DNA-binding_protein	migrant	Helix-turn-helix_domains	Homeo_domain_factors	-
PROX1	dual	Monomer_or_homomultimer	High_specificity_DNA-binding_protein	migrant	Helix-turn-helix_domains	Homeo_domain_factors	-
PROX2	-	Monomer_or_homomultimer	High_specificity_DNA-binding_protein	-	Helix-turn-helix_domains	Homeo_domain_factors	-
PRRX1	-	Monomer_or_homomultimer	High_specificity_DNA-binding_protein	migrant	Helix-turn-helix_domains	Homeo_domain_factors	-
PRRX2	-	Monomer_or_homomultimer	High_specificity_DNA-binding_protein	migrant	Helix-turn-helix_domains	Homeo_domain_factors	-
PSPC1	-	-	Low_specificity_DNA-binding_protein	-	Yet_undefined_DNA-binding_domains	NonO_domain_factors	no_tissue-specific
PTF1A	-	Monomer_or_homomultimer	High_specificity_DNA-binding_protein	settler	Basic_domains	Basic_helix-loop-helix_factors_(bHLH)	tissue-specific
PURA	activators	-	High_specificity_DNA-binding_protein	settler	Yet_undefined_DNA-binding_domains	Uncharacterized	no_tissue-specific
PURB	-	-	High_specificity_DNA-binding_protein	-	Yet_undefined_DNA-binding_domains	Uncharacterized	no_tissue-specific
PURG	-	Monomer_or_homomultimer	High_specificity_DNA-binding_protein	-	Yet_undefined_DNA-binding_domains	Uncharacterized	-
RARA	dual	-	High_specificity_DNA-binding_protein	migrant	Zinc-coordinating_DNA-binding_domains	Nuclear_receptors_with_C4_zinc_fingers	no_tissue-specific
RARB	-	-	High_specificity_DNA-binding_protein	migrant	Zinc-coordinating_DNA-binding_domains	Nuclear_receptors_with_C4_zinc_fingers	-
RARG	-	-	High_specificity_DNA-binding_protein	migrant	Zinc-coordinating_DNA-binding_domains	Nuclear_receptors_with_C4_zinc_fingers	-
RAX	-	Monomer_or_homomultimer	High_specificity_DNA-binding_protein	migrant	Helix-turn-helix_domains	Homeo_domain_factors	-
RAX2	-	Monomer_or_homomultimer	High_specificity_DNA-binding_protein	migrant	Helix-turn-helix_domains	Homeo_domain_factors	-
RBAK	-	Monomer_or_homomultimer	High_specificity_DNA-binding_protein	migrant	Zinc-coordinating_DNA-binding_domains	C2H2_zinc_finger_factors	no_tissue-specific
RBPJ	dual	Monomer_or_homomultimer	High_specificity_DNA-binding_protein	migrant	Immunoglobulin_fold	Rel_homology_region_(RHR)_factors	no_tissue-specific
RBPJL	activators	Monomer_or_homomultimer	High_specificity_DNA-binding_protein	migrant	Immunoglobulin_fold	Rel_homology_region_(RHR)_factors	tissue-specific
RC3H2	-	-	Not_a_DNA_binding_protein	-	Zinc-coordinating_DNA-binding_domains	C3H_zinc_finger_factors	no_tissue-specific
RCOR1	repressors	-	Not_a_DNA_binding_protein	-	Helix-turn-helix_domains	Tryptophan_cluster_factors	no_tissue-specific
RCOR2	repressors	-	Not_a_DNA_binding_protein	migrant	Helix-turn-helix_domains	Tryptophan_cluster_factors	-
RCOR3	repressors	-	Not_a_DNA_binding_protein	-	Helix-turn-helix_domains	Tryptophan_cluster_factors	no_tissue-specific
REL	activators	Monomer_or_homomultimer	High_specificity_DNA-binding_protein	migrant	Immunoglobulin_fold	Rel_homology_region_(RHR)_factors	tissue-specific
RELA	activators	Monomer_or_homomultimer	High_specificity_DNA-binding_protein	migrant	Immunoglobulin_fold	Rel_homology_region_(RHR)_factors	no_tissue-specific
RELB	-	Obligate_heteromer	High_specificity_DNA-binding_protein	migrant	Immunoglobulin_fold	Rel_homology_region_(RHR)_factors	no_tissue-specific
RERE	repressors	-	Low_specificity_DNA-binding_protein	migrant	Helix-turn-helix_domains	Tryptophan_cluster_factors	no_tissue-specific
REST	repressors	Monomer_or_homomultimer	High_specificity_DNA-binding_protein	settler	Zinc-coordinating_DNA-binding_domains	C2H2_zinc_finger_factors	-
RFX1	-	Monomer_or_homomultimer	High_specificity_DNA-binding_protein	settler	Helix-turn-helix_domains	Fork_head_/_winged_helix_factors	no_tissue-specific
RFX2	activators	Monomer_or_homomultimer	High_specificity_DNA-binding_protein	migrant	Helix-turn-helix_domains	Fork_head_/_winged_helix_factors	-
RFX3	repressors	Monomer_or_homomultimer	High_specificity_DNA-binding_protein	migrant	Helix-turn-helix_domains	Fork_head_/_winged_helix_factors	-
RFX4	activators	-	High_specificity_DNA-binding_protein	settler	Helix-turn-helix_domains	Fork_head_/_winged_helix_factors	-
RFX5	activators	Monomer_or_homomultimer	High_specificity_DNA-binding_protein	migrant	Helix-turn-helix_domains	Fork_head_/_winged_helix_factors	no_tissue-specific
RFX6	activators	Monomer_or_homomultimer	High_specificity_DNA-binding_protein	migrant	Helix-turn-helix_domains	Fork_head_/_winged_helix_factors	-
RFX7	-	Monomer_or_homomultimer	High_specificity_DNA-binding_protein	settler	Helix-turn-helix_domains	Fork_head_/_winged_helix_factors	-
RFX8	-	Monomer_or_homomultimer	High_specificity_DNA-binding_protein	-	Helix-turn-helix_domains	Fork_head_/_winged_helix_factors	tissue-specific
RFXANK	activators	-	Not_a_DNA_binding_protein	migrant	Yet_undefined_DNA-binding_domains	Uncharacterized	no_tissue-specific
RFXAP	-	-	Not_a_DNA_binding_protein	settler	Yet_undefined_DNA-binding_domains	Uncharacterized	no_tissue-specific
RHOXF1	-	Monomer_or_homomultimer	High_specificity_DNA-binding_protein	migrant	Helix-turn-helix_domains	Homeo_domain_factors	tissue-specific
RHOXF2	-	Monomer_or_homomultimer	High_specificity_DNA-binding_protein	migrant	Helix-turn-helix_domains	Homeo_domain_factors	tissue-specific
RHOXF2B	-	Monomer_or_homomultimer	High_specificity_DNA-binding_protein	-	Helix-turn-helix_domains	Homeo_domain_factors	-
RLF	-	Monomer_or_homomultimer	High_specificity_DNA-binding_protein	settler	Zinc-coordinating_DNA-binding_domains	C2H2_zinc_finger_factors	no_tissue-specific
RORA	-	Monomer_or_homomultimer	High_specificity_DNA-binding_protein	migrant	Zinc-coordinating_DNA-binding_domains	Nuclear_receptors_with_C4_zinc_fingers	no_tissue-specific
RORB	-	Monomer_or_homomultimer	High_specificity_DNA-binding_protein	migrant	Zinc-coordinating_DNA-binding_domains	Nuclear_receptors_with_C4_zinc_fingers	tissue-specific
RORC	-	Monomer_or_homomultimer	High_specificity_DNA-binding_protein	migrant	Zinc-coordinating_DNA-binding_domains	Nuclear_receptors_with_C4_zinc_fingers	-
RREB1	-	Monomer_or_homomultimer	High_specificity_DNA-binding_protein	migrant	Zinc-coordinating_DNA-binding_domains	C2H2_zinc_finger_factors	no_tissue-specific
RUNX1	activators	-	High_specificity_DNA-binding_protein	migrant	Immunoglobulin_fold	Runt_domain_factors	-
RUNX2	activators	Monomer_or_homomultimer	High_specificity_DNA-binding_protein	migrant	Immunoglobulin_fold	Runt_domain_factors	-
RUNX3	-	Monomer_or_homomultimer	High_specificity_DNA-binding_protein	migrant	Immunoglobulin_fold	Runt_domain_factors	-
RXRA	dual	-	High_specificity_DNA-binding_protein	migrant	Zinc-coordinating_DNA-binding_domains	Nuclear_receptors_with_C4_zinc_fingers	no_tissue-specific
RXRB	-	-	High_specificity_DNA-binding_protein	migrant	Zinc-coordinating_DNA-binding_domains	Nuclear_receptors_with_C4_zinc_fingers	no_tissue-specific
RXRG	-	-	High_specificity_DNA-binding_protein	migrant	Zinc-coordinating_DNA-binding_domains	Nuclear_receptors_with_C4_zinc_fingers	-
SALL1	repressors	Monomer_or_homomultimer	High_specificity_DNA-binding_protein	pioneer	Zinc-coordinating_DNA-binding_domains	C2H2_zinc_finger_factors	-
SALL2	-	Monomer_or_homomultimer	High_specificity_DNA-binding_protein	settler	Zinc-coordinating_DNA-binding_domains	C2H2_zinc_finger_factors	-
SALL3	-	Monomer_or_homomultimer	High_specificity_DNA-binding_protein	settler	Zinc-coordinating_DNA-binding_domains	C2H2_zinc_finger_factors	tissue-specific
SALL4	-	Monomer_or_homomultimer	High_specificity_DNA-binding_protein	settler	Zinc-coordinating_DNA-binding_domains	C2H2_zinc_finger_factors	tissue-specific
SATB1	repressors	-	Low_specificity_DNA-binding_protein	migrant	Helix-turn-helix_domains	Homeo_domain_factors	no_tissue-specific
SATB2	-	-	Low_specificity_DNA-binding_protein	migrant	Helix-turn-helix_domains	Homeo_domain_factors	-
SCRT1	repressors	Monomer_or_homomultimer	High_specificity_DNA-binding_protein	pioneer	Zinc-coordinating_DNA-binding_domains	C2H2_zinc_finger_factors	-
SCRT2	-	Monomer_or_homomultimer	High_specificity_DNA-binding_protein	migrant	Zinc-coordinating_DNA-binding_domains	C2H2_zinc_finger_factors	-
SCX	-	Monomer_or_homomultimer	High_specificity_DNA-binding_protein	-	Basic_domains	Basic_helix-loop-helix_factors_(bHLH)	-
SEBOX	-	Monomer_or_homomultimer	High_specificity_DNA-binding_protein	-	Helix-turn-helix_domains	Homeo_domain_factors	-
SFPQ	dual	Obligate_heteromer	Not_a_DNA_binding_protein	settler	Yet_undefined_DNA-binding_domains	NonO_domain_factors	no_tissue-specific
SHOX	-	Monomer_or_homomultimer	High_specificity_DNA-binding_protein	migrant	Helix-turn-helix_domains	Homeo_domain_factors	-
SHOX2	-	Monomer_or_homomultimer	High_specificity_DNA-binding_protein	migrant	Helix-turn-helix_domains	Homeo_domain_factors	-
SIM1	-	Obligate_heteromer	High_specificity_DNA-binding_protein	settler	Basic_domains	Basic_helix-loop-helix_factors_(bHLH)	tissue-specific
SIM2	-	Obligate_heteromer	High_specificity_DNA-binding_protein	settler	Basic_domains	Basic_helix-loop-helix_factors_(bHLH)	tissue-specific
SIX1	dual	Monomer_or_homomultimer	High_specificity_DNA-binding_protein	migrant	Helix-turn-helix_domains	Homeo_domain_factors	-
SIX2	activators	Monomer_or_homomultimer	High_specificity_DNA-binding_protein	migrant	Helix-turn-helix_domains	Homeo_domain_factors	-
SIX3	dual	Monomer_or_homomultimer	High_specificity_DNA-binding_protein	migrant	Helix-turn-helix_domains	Homeo_domain_factors	tissue-specific
SIX4	dual	Monomer_or_homomultimer	High_specificity_DNA-binding_protein	migrant	Helix-turn-helix_domains	Homeo_domain_factors	-
SIX5	-	Monomer_or_homomultimer	High_specificity_DNA-binding_protein	migrant	Helix-turn-helix_domains	Homeo_domain_factors	-
SIX6	-	Monomer_or_homomultimer	High_specificity_DNA-binding_protein	migrant	Helix-turn-helix_domains	Homeo_domain_factors	tissue-specific
SMAD1	-	Obligate_heteromer	High_specificity_DNA-binding_protein	pioneer		SMAD/NF-1_DNA-binding_domain_factors	-
SMAD2	activators	Obligate_heteromer	Not_a_DNA_binding_protein	pioneer		SMAD/NF-1_DNA-binding_domain_factors	-
SMAD3	activators	Monomer_or_homomultimer	High_specificity_DNA-binding_protein	pioneer		SMAD/NF-1_DNA-binding_domain_factors	no_tissue-specific
SMAD4	activators	Monomer_or_homomultimer	High_specificity_DNA-binding_protein	pioneer		SMAD/NF-1_DNA-binding_domain_factors	no_tissue-specific
SMAD5	-	Monomer_or_homomultimer	High_specificity_DNA-binding_protein	settler		SMAD/NF-1_DNA-binding_domain_factors	no_tissue-specific
SMAD6	-	-	Not_a_DNA_binding_protein	settler		SMAD/NF-1_DNA-binding_domain_factors	-
SMAD7	-	-	Not_a_DNA_binding_protein	settler		SMAD/NF-1_DNA-binding_domain_factors	no_tissue-specific
SMAD9	-	Obligate_heteromer	High_specificity_DNA-binding_protein	settler		SMAD/NF-1_DNA-binding_domain_factors	-
SMARCA1	-	-	Low_specificity_DNA-binding_protein	migrant	Helix-turn-helix_domains	Tryptophan_cluster_factors	no_tissue-specific
SMARCA5	repressors	-	Low_specificity_DNA-binding_protein	migrant	Helix-turn-helix_domains	Tryptophan_cluster_factors	no_tissue-specific
SMARCC1	dual	-	Not_a_DNA_binding_protein	migrant	Helix-turn-helix_domains	Tryptophan_cluster_factors	no_tissue-specific
SMARCC2	dual	-	Not_a_DNA_binding_protein	migrant	Helix-turn-helix_domains	Tryptophan_cluster_factors	no_tissue-specific
SMARCE1	dual	-	Low_specificity_DNA-binding_protein	migrant	Other_all--helical_DNA-binding_domains	High-mobility_group_(HMG)_domain_factors	no_tissue-specific
SNAI1	repressors	Monomer_or_homomultimer	High_specificity_DNA-binding_protein	pioneer	Zinc-coordinating_DNA-binding_domains	C2H2_zinc_finger_factors	-
SNAI2	repressors	Monomer_or_homomultimer	High_specificity_DNA-binding_protein	migrant	Zinc-coordinating_DNA-binding_domains	C2H2_zinc_finger_factors	-
SNAI3	repressors	Monomer_or_homomultimer	High_specificity_DNA-binding_protein	migrant	Zinc-coordinating_DNA-binding_domains	C2H2_zinc_finger_factors	-
SNAPC4	-	Monomer_or_homomultimer	High_specificity_DNA-binding_protein	migrant	Helix-turn-helix_domains	Tryptophan_cluster_factors	no_tissue-specific
SOHLH1	-	Obligate_heteromer	High_specificity_DNA-binding_protein	-	Basic_domains	Basic_helix-loop-helix_factors_(bHLH)	tissue-specific
SOHLH2	-	Monomer_or_homomultimer	High_specificity_DNA-binding_protein	-	Basic_domains	Basic_helix-loop-helix_factors_(bHLH)	tissue-specific
SOX1	activators	Monomer_or_homomultimer	High_specificity_DNA-binding_protein	migrant	Other_all--helical_DNA-binding_domains	High-mobility_group_(HMG)_domain_factors	-
SOX10	activators	Monomer_or_homomultimer	High_specificity_DNA-binding_protein	migrant	Other_all--helical_DNA-binding_domains	High-mobility_group_(HMG)_domain_factors	-
SOX11	-	Monomer_or_homomultimer	High_specificity_DNA-binding_protein	migrant	Other_all--helical_DNA-binding_domains	High-mobility_group_(HMG)_domain_factors	-
SOX12	-	Monomer_or_homomultimer	High_specificity_DNA-binding_protein	migrant	Other_all--helical_DNA-binding_domains	High-mobility_group_(HMG)_domain_factors	no_tissue-specific
SOX13	-	Monomer_or_homomultimer	High_specificity_DNA-binding_protein	migrant	Other_all--helical_DNA-binding_domains	High-mobility_group_(HMG)_domain_factors	no_tissue-specific
SOX14	repressors	Monomer_or_homomultimer	High_specificity_DNA-binding_protein	migrant	Other_all--helical_DNA-binding_domains	High-mobility_group_(HMG)_domain_factors	-
SOX15	-	Monomer_or_homomultimer	High_specificity_DNA-binding_protein	migrant	Other_all--helical_DNA-binding_domains	High-mobility_group_(HMG)_domain_factors	-
SOX17	activators	Monomer_or_homomultimer	High_specificity_DNA-binding_protein	migrant	Other_all--helical_DNA-binding_domains	High-mobility_group_(HMG)_domain_factors	-
SOX18	activators	Monomer_or_homomultimer	High_specificity_DNA-binding_protein	-	Other_all--helical_DNA-binding_domains	High-mobility_group_(HMG)_domain_factors	no_tissue-specific
SOX2	activators	Monomer_or_homomultimer	High_specificity_DNA-binding_protein	migrant	Other_all--helical_DNA-binding_domains	High-mobility_group_(HMG)_domain_factors	-
SOX21	activators	Monomer_or_homomultimer	High_specificity_DNA-binding_protein	migrant	Other_all--helical_DNA-binding_domains	High-mobility_group_(HMG)_domain_factors	tissue-specific
SOX3	-	Monomer_or_homomultimer	High_specificity_DNA-binding_protein	migrant	Other_all--helical_DNA-binding_domains	High-mobility_group_(HMG)_domain_factors	tissue-specific
SOX30	activators	Monomer_or_homomultimer	High_specificity_DNA-binding_protein	migrant	Other_all--helical_DNA-binding_domains	High-mobility_group_(HMG)_domain_factors	tissue-specific
SOX4	activators	Monomer_or_homomultimer	High_specificity_DNA-binding_protein	migrant	Other_all--helical_DNA-binding_domains	High-mobility_group_(HMG)_domain_factors	-
SOX5	activators	Monomer_or_homomultimer	High_specificity_DNA-binding_protein	migrant	Other_all--helical_DNA-binding_domains	High-mobility_group_(HMG)_domain_factors	-
SOX6	activators	Monomer_or_homomultimer	High_specificity_DNA-binding_protein	migrant	Other_all--helical_DNA-binding_domains	High-mobility_group_(HMG)_domain_factors	tissue-specific
SOX7	activators	Monomer_or_homomultimer	High_specificity_DNA-binding_protein	migrant	Other_all--helical_DNA-binding_domains	High-mobility_group_(HMG)_domain_factors	-
SOX8	-	Monomer_or_homomultimer	High_specificity_DNA-binding_protein	migrant	Other_all--helical_DNA-binding_domains	High-mobility_group_(HMG)_domain_factors	-
SOX9	activators	Monomer_or_homomultimer	High_specificity_DNA-binding_protein	migrant	Other_all--helical_DNA-binding_domains	High-mobility_group_(HMG)_domain_factors	-
SP1	dual	Monomer_or_homomultimer	High_specificity_DNA-binding_protein	pioneer	Zinc-coordinating_DNA-binding_domains	C2H2_zinc_finger_factors	no_tissue-specific
SP100	-	Monomer_or_homomultimer	High_specificity_DNA-binding_protein	pioneer		SAND_domain_factors	no_tissue-specific
SP110	-	Monomer_or_homomultimer	High_specificity_DNA-binding_protein	migrant		SAND_domain_factors	-
SP140	-	Monomer_or_homomultimer	High_specificity_DNA-binding_protein	migrant		SAND_domain_factors	tissue-specific
SP140L	-	Monomer_or_homomultimer	High_specificity_DNA-binding_protein	-		SAND_domain_factors	-
SP2	-	Monomer_or_homomultimer	High_specificity_DNA-binding_protein	pioneer	Zinc-coordinating_DNA-binding_domains	C2H2_zinc_finger_factors	no_tissue-specific
SP3	-	Monomer_or_homomultimer	High_specificity_DNA-binding_protein	pioneer	Zinc-coordinating_DNA-binding_domains	C2H2_zinc_finger_factors	no_tissue-specific
SP4	activators	Monomer_or_homomultimer	High_specificity_DNA-binding_protein	pioneer	Zinc-coordinating_DNA-binding_domains	C2H2_zinc_finger_factors	-
SP5	activators	Monomer_or_homomultimer	High_specificity_DNA-binding_protein	-	Zinc-coordinating_DNA-binding_domains	C2H2_zinc_finger_factors	tissue-specific
SP6	-	Monomer_or_homomultimer	High_specificity_DNA-binding_protein	-	Zinc-coordinating_DNA-binding_domains	C2H2_zinc_finger_factors	tissue-specific
SP7	activators	Monomer_or_homomultimer	High_specificity_DNA-binding_protein	pioneer	Zinc-coordinating_DNA-binding_domains	C2H2_zinc_finger_factors	-
SP8	-	Monomer_or_homomultimer	High_specificity_DNA-binding_protein	pioneer	Zinc-coordinating_DNA-binding_domains	C2H2_zinc_finger_factors	-
SP9	-	Monomer_or_homomultimer	High_specificity_DNA-binding_protein	-	Zinc-coordinating_DNA-binding_domains	C2H2_zinc_finger_factors	-
SPDEF	activators	Monomer_or_homomultimer	High_specificity_DNA-binding_protein	settler	Helix-turn-helix_domains	Tryptophan_cluster_factors	-
SPI1	activators	Monomer_or_homomultimer	High_specificity_DNA-binding_protein	pioneer	Helix-turn-helix_domains	Tryptophan_cluster_factors	no_tissue-specific
SPIB	activators	Monomer_or_homomultimer	High_specificity_DNA-binding_protein	pioneer	Helix-turn-helix_domains	Tryptophan_cluster_factors	tissue-specific
SPIC	-	Monomer_or_homomultimer	High_specificity_DNA-binding_protein	pioneer	Helix-turn-helix_domains	Tryptophan_cluster_factors	tissue-specific
SREBF1	activators	Monomer_or_homomultimer	High_specificity_DNA-binding_protein	settler	Basic_domains	Basic_helix-loop-helix_factors_(bHLH)	no_tissue-specific
SREBF2	activators	Monomer_or_homomultimer	High_specificity_DNA-binding_protein	settler	Basic_domains	Basic_helix-loop-helix_factors_(bHLH)	no_tissue-specific
SRF	-	Monomer_or_homomultimer	High_specificity_DNA-binding_protein	migrant		MADS_box_factors	no_tissue-specific
SRY	dual	Monomer_or_homomultimer	High_specificity_DNA-binding_protein	migrant	Other_all--helical_DNA-binding_domains	High-mobility_group_(HMG)_domain_factors	tissue-specific
SSRP1	-	-	Low_specificity_DNA-binding_protein	migrant	Other_all--helical_DNA-binding_domains	High-mobility_group_(HMG)_domain_factors	no_tissue-specific
ST18	repressors	Monomer_or_homomultimer	High_specificity_DNA-binding_protein	migrant	Zinc-coordinating_DNA-binding_domains	C2HC_zinc_finger_factors	tissue-specific
STAT1	activators	-	High_specificity_DNA-binding_protein	migrant	Immunoglobulin_fold	STAT_domain_factors	no_tissue-specific
STAT2	activators	-	High_specificity_DNA-binding_protein	migrant	Immunoglobulin_fold	STAT_domain_factors	no_tissue-specific
STAT3	activators	-	High_specificity_DNA-binding_protein	migrant	Immunoglobulin_fold	STAT_domain_factors	no_tissue-specific
STAT4	activators	-	High_specificity_DNA-binding_protein	migrant	Immunoglobulin_fold	STAT_domain_factors	-
STAT5A	activators	-	High_specificity_DNA-binding_protein	migrant	Immunoglobulin_fold	STAT_domain_factors	no_tissue-specific
STAT5B	activators	-	High_specificity_DNA-binding_protein	migrant	Immunoglobulin_fold	STAT_domain_factors	no_tissue-specific
STAT6	activators	-	High_specificity_DNA-binding_protein	migrant	Immunoglobulin_fold	STAT_domain_factors	no_tissue-specific
T	activators	Monomer_or_homomultimer	High_specificity_DNA-binding_protein	settler	Immunoglobulin_fold	T-Box_factors	-
TADA2A	activators	-	Not_a_DNA_binding_protein	migrant	Helix-turn-helix_domains	Tryptophan_cluster_factors	no_tissue-specific
TADA2B	-	-	Not_a_DNA_binding_protein	-	Helix-turn-helix_domains	Tryptophan_cluster_factors	no_tissue-specific
TAF1	-	-	Low_specificity_DNA-binding_protein	migrant	Other_all--helical_DNA-binding_domains	High-mobility_group_(HMG)_domain_factors	no_tissue-specific
TAL1	-	Obligate_heteromer	High_specificity_DNA-binding_protein	settler	Basic_domains	Basic_helix-loop-helix_factors_(bHLH)	-
TAL2	-	Obligate_heteromer	High_specificity_DNA-binding_protein	settler	Basic_domains	Basic_helix-loop-helix_factors_(bHLH)	-
TBP	-	Monomer_or_homomultimer	High_specificity_DNA-binding_protein	migrant		TATA-binding_proteins	no_tissue-specific
TBPL1	-	Obligate_heteromer	High_specificity_DNA-binding_protein	migrant		TATA-binding_proteins	no_tissue-specific
TBPL2	-	Monomer_or_homomultimer	High_specificity_DNA-binding_protein	-		TATA-binding_proteins	-
TBR1	-	Monomer_or_homomultimer	High_specificity_DNA-binding_protein	settler	Immunoglobulin_fold	T-Box_factors	-
TBX1	-	Monomer_or_homomultimer	High_specificity_DNA-binding_protein	settler	Immunoglobulin_fold	T-Box_factors	-
TBX10	-	Monomer_or_homomultimer	High_specificity_DNA-binding_protein	settler	Immunoglobulin_fold	T-Box_factors	-
TBX15	-	-	High_specificity_DNA-binding_protein	settler	Immunoglobulin_fold	T-Box_factors	-
TBX18	repressors	-	High_specificity_DNA-binding_protein	settler	Immunoglobulin_fold	T-Box_factors	-
TBX19	-	Monomer_or_homomultimer	High_specificity_DNA-binding_protein	settler	Immunoglobulin_fold	T-Box_factors	-
TBX2	-	Monomer_or_homomultimer	High_specificity_DNA-binding_protein	migrant	Immunoglobulin_fold	T-Box_factors	no_tissue-specific
TBX20	dual	Monomer_or_homomultimer	High_specificity_DNA-binding_protein	migrant	Immunoglobulin_fold	T-Box_factors	tissue-specific
TBX21	activators	Monomer_or_homomultimer	High_specificity_DNA-binding_protein	migrant	Immunoglobulin_fold	T-Box_factors	-
TBX22	-	Monomer_or_homomultimer	High_specificity_DNA-binding_protein	settler	Immunoglobulin_fold	T-Box_factors	tissue-specific
TBX3	repressors	Monomer_or_homomultimer	High_specificity_DNA-binding_protein	settler	Immunoglobulin_fold	T-Box_factors	-
TBX4	-	Monomer_or_homomultimer	High_specificity_DNA-binding_protein	settler	Immunoglobulin_fold	T-Box_factors	tissue-specific
TBX5	-	Monomer_or_homomultimer	High_specificity_DNA-binding_protein	settler	Immunoglobulin_fold	T-Box_factors	-
TBX6	-	Monomer_or_homomultimer	High_specificity_DNA-binding_protein	settler	Immunoglobulin_fold	T-Box_factors	-
TCF12	activators	Monomer_or_homomultimer	High_specificity_DNA-binding_protein	settler	Basic_domains	Basic_helix-loop-helix_factors_(bHLH)	no_tissue-specific
TCF15	-	Monomer_or_homomultimer	High_specificity_DNA-binding_protein	settler	Basic_domains	Basic_helix-loop-helix_factors_(bHLH)	-
TCF21	-	-	High_specificity_DNA-binding_protein	settler	Basic_domains	Basic_helix-loop-helix_factors_(bHLH)	-
TCF23	repressors	Monomer_or_homomultimer	High_specificity_DNA-binding_protein	-	Basic_domains	Basic_helix-loop-helix_factors_(bHLH)	-
TCF25	repressors	-	Not_a_DNA_binding_protein	-	Yet_undefined_DNA-binding_domains	Uncharacterized	no_tissue-specific
TCF3	-	-	High_specificity_DNA-binding_protein	migrant	Basic_domains	Basic_helix-loop-helix_factors_(bHLH)	no_tissue-specific
TCF4	activators	Monomer_or_homomultimer	High_specificity_DNA-binding_protein	settler	Basic_domains	Basic_helix-loop-helix_factors_(bHLH)	-
TCF7	activators	Monomer_or_homomultimer	High_specificity_DNA-binding_protein	migrant	Other_all--helical_DNA-binding_domains	High-mobility_group_(HMG)_domain_factors	-
TCF7L1	dual	Monomer_or_homomultimer	High_specificity_DNA-binding_protein	migrant	Other_all--helical_DNA-binding_domains	High-mobility_group_(HMG)_domain_factors	no_tissue-specific
TCF7L2	dual	Monomer_or_homomultimer	High_specificity_DNA-binding_protein	migrant	Other_all--helical_DNA-binding_domains	High-mobility_group_(HMG)_domain_factors	no_tissue-specific
TCFL5	-	Monomer_or_homomultimer	High_specificity_DNA-binding_protein	settler	Basic_domains	Basic_helix-loop-helix_factors_(bHLH)	no_tissue-specific
TEAD1	activators	Monomer_or_homomultimer	High_specificity_DNA-binding_protein	migrant	Helix-turn-helix_domains	TEA_domain_factors	no_tissue-specific
TEAD2	-	Monomer_or_homomultimer	High_specificity_DNA-binding_protein	migrant	Helix-turn-helix_domains	TEA_domain_factors	no_tissue-specific
TEAD3	-	Monomer_or_homomultimer	High_specificity_DNA-binding_protein	migrant	Helix-turn-helix_domains	TEA_domain_factors	no_tissue-specific
TEAD4	activators	Monomer_or_homomultimer	High_specificity_DNA-binding_protein	migrant	Helix-turn-helix_domains	TEA_domain_factors	-
TEF	activators	-	High_specificity_DNA-binding_protein	migrant	Basic_domains	Basic_leucine_zipper_factors_(bZIP)	no_tissue-specific
TET1	-	Monomer_or_homomultimer	High_specificity_DNA-binding_protein	-	Zinc-coordinating_DNA-binding_domains	CXXC_zinc_finger_factors	-
TFAM	activators	-	Low_specificity_DNA-binding_protein	-	Other_all--helical_DNA-binding_domains	High-mobility_group_(HMG)_domain_factors	no_tissue-specific
TFAP2A	activators	Monomer_or_homomultimer	High_specificity_DNA-binding_protein	pioneer	Basic_domains	Basic_helix-span-helix_factors_(bHSH)	-
TFAP2B	activators	Monomer_or_homomultimer	High_specificity_DNA-binding_protein	pioneer	Basic_domains	Basic_helix-span-helix_factors_(bHSH)	-
TFAP2C	activators	Monomer_or_homomultimer	High_specificity_DNA-binding_protein	-	Basic_domains	Basic_helix-span-helix_factors_(bHSH)	-
TFAP2D	activators	Monomer_or_homomultimer	High_specificity_DNA-binding_protein	pioneer	Basic_domains	Basic_helix-span-helix_factors_(bHSH)	-
TFAP2E	activators	Monomer_or_homomultimer	High_specificity_DNA-binding_protein	pioneer	Basic_domains	Basic_helix-span-helix_factors_(bHSH)	-
TFAP4	activators	Monomer_or_homomultimer	High_specificity_DNA-binding_protein	-	Basic_domains	Basic_helix-loop-helix_factors_(bHLH)	-
TFCP2	-	Monomer_or_homomultimer	High_specificity_DNA-binding_protein	migrant	Immunoglobulin_fold	Grainyhead_domain_factors	no_tissue-specific
TFCP2L1	repressors	Monomer_or_homomultimer	High_specificity_DNA-binding_protein	migrant	Immunoglobulin_fold	Grainyhead_domain_factors	-
TFDP1	-	Obligate_heteromer	High_specificity_DNA-binding_protein	migrant	Helix-turn-helix_domains	Fork_head_/_winged_helix_factors	no_tissue-specific
TFDP2	-	Obligate_heteromer	High_specificity_DNA-binding_protein	migrant	Helix-turn-helix_domains	Fork_head_/_winged_helix_factors	no_tissue-specific
TFE3	activators	-	High_specificity_DNA-binding_protein	settler	Basic_domains	Basic_helix-loop-helix_factors_(bHLH)	no_tissue-specific
TFEB	activators	-	High_specificity_DNA-binding_protein	settler	Basic_domains	Basic_helix-loop-helix_factors_(bHLH)	no_tissue-specific
TFEC	dual	Monomer_or_homomultimer	High_specificity_DNA-binding_protein	settler	Basic_domains	Basic_helix-loop-helix_factors_(bHLH)	-
TGIF1	-	Monomer_or_homomultimer	High_specificity_DNA-binding_protein	migrant	Helix-turn-helix_domains	Homeo_domain_factors	no_tissue-specific
TGIF2	repressors	Monomer_or_homomultimer	High_specificity_DNA-binding_protein	migrant	Helix-turn-helix_domains	Homeo_domain_factors	no_tissue-specific
TGIF2LX	-	Monomer_or_homomultimer	High_specificity_DNA-binding_protein	migrant	Helix-turn-helix_domains	Homeo_domain_factors	tissue-specific
TGIF2LY	-	Monomer_or_homomultimer	High_specificity_DNA-binding_protein	migrant	Helix-turn-helix_domains	Homeo_domain_factors	-
THAP1	-	Monomer_or_homomultimer	High_specificity_DNA-binding_protein	-	Zinc-coordinating_DNA-binding_domains	C2CH_THAP-type_zinc_finger_factors	no_tissue-specific
THAP10	-	Monomer_or_homomultimer	High_specificity_DNA-binding_protein	-	Zinc-coordinating_DNA-binding_domains	C2CH_THAP-type_zinc_finger_factors	-
THAP11	repressors	Monomer_or_homomultimer	High_specificity_DNA-binding_protein	-	Zinc-coordinating_DNA-binding_domains	C2CH_THAP-type_zinc_finger_factors	no_tissue-specific
THAP12	-	Monomer_or_homomultimer	High_specificity_DNA-binding_protein	-	-	-	-
THAP2	-	Monomer_or_homomultimer	High_specificity_DNA-binding_protein	-	Zinc-coordinating_DNA-binding_domains	C2CH_THAP-type_zinc_finger_factors	tissue-specific
THAP3	-	Monomer_or_homomultimer	High_specificity_DNA-binding_protein	-	Zinc-coordinating_DNA-binding_domains	C2CH_THAP-type_zinc_finger_factors	no_tissue-specific
THAP4	-	Monomer_or_homomultimer	High_specificity_DNA-binding_protein	-	Zinc-coordinating_DNA-binding_domains	C2CH_THAP-type_zinc_finger_factors	no_tissue-specific
THAP5	-	Monomer_or_homomultimer	High_specificity_DNA-binding_protein	-	Zinc-coordinating_DNA-binding_domains	C2CH_THAP-type_zinc_finger_factors	no_tissue-specific
THAP6	-	Monomer_or_homomultimer	High_specificity_DNA-binding_protein	-	Zinc-coordinating_DNA-binding_domains	C2CH_THAP-type_zinc_finger_factors	no_tissue-specific
THAP7	-	Monomer_or_homomultimer	High_specificity_DNA-binding_protein	migrant	Zinc-coordinating_DNA-binding_domains	C2CH_THAP-type_zinc_finger_factors	no_tissue-specific
THAP8	-	Monomer_or_homomultimer	High_specificity_DNA-binding_protein	-	Zinc-coordinating_DNA-binding_domains	C2CH_THAP-type_zinc_finger_factors	no_tissue-specific
THAP9	-	Monomer_or_homomultimer	High_specificity_DNA-binding_protein	-	Zinc-coordinating_DNA-binding_domains	C2CH_THAP-type_zinc_finger_factors	-
THRA	dual	-	High_specificity_DNA-binding_protein	migrant	Zinc-coordinating_DNA-binding_domains	Nuclear_receptors_with_C4_zinc_fingers	no_tissue-specific
THRB	dual	-	High_specificity_DNA-binding_protein	migrant	Zinc-coordinating_DNA-binding_domains	Nuclear_receptors_with_C4_zinc_fingers	-
TLX1	-	Monomer_or_homomultimer	High_specificity_DNA-binding_protein	migrant	Helix-turn-helix_domains	Homeo_domain_factors	tissue-specific
TLX2	-	Monomer_or_homomultimer	High_specificity_DNA-binding_protein	migrant	Helix-turn-helix_domains	Homeo_domain_factors	-
TLX3	-	Monomer_or_homomultimer	High_specificity_DNA-binding_protein	migrant	Helix-turn-helix_domains	Homeo_domain_factors	-
TONSL	-	-	Low_specificity_DNA-binding_protein	migrant	Immunoglobulin_fold	Rel_homology_region_(RHR)_factors	-
TOX	-	-	Low_specificity_DNA-binding_protein	migrant	Other_all--helical_DNA-binding_domains	High-mobility_group_(HMG)_domain_factors	-
TOX2	-	-	Low_specificity_DNA-binding_protein	migrant	Other_all--helical_DNA-binding_domains	High-mobility_group_(HMG)_domain_factors	-
TOX3	-	-	Low_specificity_DNA-binding_protein	migrant	Other_all--helical_DNA-binding_domains	High-mobility_group_(HMG)_domain_factors	-
TOX4	-	-	Low_specificity_DNA-binding_protein	migrant	Other_all--helical_DNA-binding_domains	High-mobility_group_(HMG)_domain_factors	no_tissue-specific
TP53	activators	Monomer_or_homomultimer	High_specificity_DNA-binding_protein	migrant	Immunoglobulin_fold	p53_domain_factors	no_tissue-specific
TP63	dual	Monomer_or_homomultimer	High_specificity_DNA-binding_protein	migrant	Immunoglobulin_fold	p53_domain_factors	-
TP73	-	Monomer_or_homomultimer	High_specificity_DNA-binding_protein	migrant	Immunoglobulin_fold	p53_domain_factors	tissue-specific
TPRX1	-	Monomer_or_homomultimer	High_specificity_DNA-binding_protein	-	Helix-turn-helix_domains	Homeo_domain_factors	-
TPRXL	-	-	-	-	Helix-turn-helix_domains	Homeo_domain_factors	-
TRERF1	activators	Monomer_or_homomultimer	High_specificity_DNA-binding_protein	settler	Helix-turn-helix_domains	Tryptophan_cluster_factors	-
TRPS1	repressors	Monomer_or_homomultimer	High_specificity_DNA-binding_protein	migrant	Zinc-coordinating_DNA-binding_domains	C2H2_zinc_finger_factors	-
TSC22D1	repressors	-	High_specificity_DNA-binding_protein	migrant	Basic_domains	Basic_leucine_zipper_factors_(bZIP)	no_tissue-specific
TSC22D2	-	-	Not_a_DNA_binding_protein	migrant	Basic_domains	Basic_leucine_zipper_factors_(bZIP)	no_tissue-specific
TSC22D3	-	-	Not_a_DNA_binding_protein	migrant	Basic_domains	Basic_leucine_zipper_factors_(bZIP)	no_tissue-specific
TSC22D4	repressors	Obligate_heteromer	Not_a_DNA_binding_protein	migrant	Basic_domains	Basic_leucine_zipper_factors_(bZIP)	no_tissue-specific
TSHZ1	-	Monomer_or_homomultimer	High_specificity_DNA-binding_protein	migrant	Helix-turn-helix_domains	Homeo_domain_factors	no_tissue-specific
TSHZ2	-	Monomer_or_homomultimer	High_specificity_DNA-binding_protein	migrant	Helix-turn-helix_domains	Homeo_domain_factors	-
TSHZ3	-	Monomer_or_homomultimer	High_specificity_DNA-binding_protein	migrant	Helix-turn-helix_domains	Homeo_domain_factors	-
TWIST1	dual	-	High_specificity_DNA-binding_protein	settler	Basic_domains	Basic_helix-loop-helix_factors_(bHLH)	-
TWIST2	-	-	High_specificity_DNA-binding_protein	settler	Basic_domains	Basic_helix-loop-helix_factors_(bHLH)	-
UBP1	dual	Monomer_or_homomultimer	High_specificity_DNA-binding_protein	migrant	Immunoglobulin_fold	Grainyhead_domain_factors	no_tissue-specific
UBTF	activators	-	Low_specificity_DNA-binding_protein	migrant	Other_all--helical_DNA-binding_domains	High-mobility_group_(HMG)_domain_factors	no_tissue-specific
UBTFL1	-	-	Low_specificity_DNA-binding_protein	-	Other_all--helical_DNA-binding_domains	High-mobility_group_(HMG)_domain_factors	-
UBTFL6	-	-	Not_a_DNA_binding_protein	-	Other_all--helical_DNA-binding_domains	High-mobility_group_(HMG)_domain_factors	-
UNCX	-	Monomer_or_homomultimer	High_specificity_DNA-binding_protein	-	Helix-turn-helix_domains	Homeo_domain_factors	-
USF1	-	-	High_specificity_DNA-binding_protein	settler	Basic_domains	Basic_helix-loop-helix_factors_(bHLH)	no_tissue-specific
USF2	-	-	High_specificity_DNA-binding_protein	settler	Basic_domains	Basic_helix-loop-helix_factors_(bHLH)	no_tissue-specific
UTF1	-	-	Not_a_DNA_binding_protein	migrant	Basic_domains	Basic_leucine_zipper_factors_(bZIP)	tissue-specific
VAX1	-	Monomer_or_homomultimer	High_specificity_DNA-binding_protein	migrant	Helix-turn-helix_domains	Homeo_domain_factors	-
VAX2	-	Monomer_or_homomultimer	High_specificity_DNA-binding_protein	migrant	Helix-turn-helix_domains	Homeo_domain_factors	-
VDR	activators	-	High_specificity_DNA-binding_protein	migrant	Zinc-coordinating_DNA-binding_domains	Nuclear_receptors_with_C4_zinc_fingers	-
VENTX	-	Monomer_or_homomultimer	High_specificity_DNA-binding_protein	migrant	Helix-turn-helix_domains	Homeo_domain_factors	-
VEZF1	-	Monomer_or_homomultimer	High_specificity_DNA-binding_protein	pioneer	Zinc-coordinating_DNA-binding_domains	C2H2_zinc_finger_factors	no_tissue-specific
VSX1	-	Monomer_or_homomultimer	High_specificity_DNA-binding_protein	migrant	Helix-turn-helix_domains	Homeo_domain_factors	tissue-specific
VSX2	-	Monomer_or_homomultimer	High_specificity_DNA-binding_protein	migrant	Helix-turn-helix_domains	Homeo_domain_factors	-
WIZ	-	Monomer_or_homomultimer	High_specificity_DNA-binding_protein	-	Zinc-coordinating_DNA-binding_domains	C2H2_zinc_finger_factors	no_tissue-specific
WT1	-	Monomer_or_homomultimer	High_specificity_DNA-binding_protein	pioneer	Zinc-coordinating_DNA-binding_domains	C2H2_zinc_finger_factors	-
XBP1	dual	Monomer_or_homomultimer	High_specificity_DNA-binding_protein	migrant	Basic_domains	Basic_leucine_zipper_factors_(bZIP)	-
YBX1	-	Monomer_or_homomultimer	High_specificity_DNA-binding_protein	settler		Cold-shock_domain_factors	no_tissue-specific
YBX2	-	Monomer_or_homomultimer	High_specificity_DNA-binding_protein	settler		Cold-shock_domain_factors	-
YBX3	repressors	Monomer_or_homomultimer	High_specificity_DNA-binding_protein	settler		Cold-shock_domain_factors	no_tissue-specific
YY1	dual	Monomer_or_homomultimer	High_specificity_DNA-binding_protein	migrant	Zinc-coordinating_DNA-binding_domains	C2H2_zinc_finger_factors	no_tissue-specific
YY2	dual	Monomer_or_homomultimer	High_specificity_DNA-binding_protein	-	Zinc-coordinating_DNA-binding_domains	C2H2_zinc_finger_factors	tissue-specific
ZBED1	activators	Monomer_or_homomultimer	High_specificity_DNA-binding_protein	-	Zinc-coordinating_DNA-binding_domains	C2H2_zinc_finger_factors	no_tissue-specific
ZBED2	-	Monomer_or_homomultimer	High_specificity_DNA-binding_protein	-	Zinc-coordinating_DNA-binding_domains	C2H2_zinc_finger_factors	tissue-specific
ZBED3	-	Monomer_or_homomultimer	High_specificity_DNA-binding_protein	-	Zinc-coordinating_DNA-binding_domains	C2H2_zinc_finger_factors	-
ZBED4	-	Monomer_or_homomultimer	High_specificity_DNA-binding_protein	-	Zinc-coordinating_DNA-binding_domains	C2H2_zinc_finger_factors	no_tissue-specific
ZBED5	-	Monomer_or_homomultimer	High_specificity_DNA-binding_protein	-	Zinc-coordinating_DNA-binding_domains	C2H2_zinc_finger_factors	no_tissue-specific
ZBED6	repressors	Monomer_or_homomultimer	High_specificity_DNA-binding_protein	-	Zinc-coordinating_DNA-binding_domains	C2H2_zinc_finger_factors	-
ZBTB1	repressors	Monomer_or_homomultimer	High_specificity_DNA-binding_protein	pioneer	Zinc-coordinating_DNA-binding_domains	C2H2_zinc_finger_factors	no_tissue-specific
ZBTB11	-	Monomer_or_homomultimer	High_specificity_DNA-binding_protein	migrant	Zinc-coordinating_DNA-binding_domains	C2H2_zinc_finger_factors	no_tissue-specific
ZBTB12	-	Monomer_or_homomultimer	High_specificity_DNA-binding_protein	migrant	Zinc-coordinating_DNA-binding_domains	C2H2_zinc_finger_factors	-
ZBTB14	dual	Monomer_or_homomultimer	High_specificity_DNA-binding_protein	pioneer	Zinc-coordinating_DNA-binding_domains	C2H2_zinc_finger_factors	no_tissue-specific
ZBTB16	-	Monomer_or_homomultimer	High_specificity_DNA-binding_protein	pioneer	Zinc-coordinating_DNA-binding_domains	C2H2_zinc_finger_factors	-
ZBTB17	dual	Monomer_or_homomultimer	High_specificity_DNA-binding_protein	pioneer	Zinc-coordinating_DNA-binding_domains	C2H2_zinc_finger_factors	no_tissue-specific
ZBTB18	repressors	Monomer_or_homomultimer	High_specificity_DNA-binding_protein	migrant	Zinc-coordinating_DNA-binding_domains	C2H2_zinc_finger_factors	no_tissue-specific
ZBTB2	-	Monomer_or_homomultimer	High_specificity_DNA-binding_protein	pioneer	Zinc-coordinating_DNA-binding_domains	C2H2_zinc_finger_factors	no_tissue-specific
ZBTB20	-	Monomer_or_homomultimer	High_specificity_DNA-binding_protein	pioneer	Zinc-coordinating_DNA-binding_domains	C2H2_zinc_finger_factors	tissue-specific
ZBTB21	-	Monomer_or_homomultimer	High_specificity_DNA-binding_protein	pioneer	Zinc-coordinating_DNA-binding_domains	C2H2_zinc_finger_factors	-
ZBTB22	-	Monomer_or_homomultimer	High_specificity_DNA-binding_protein	pioneer	Zinc-coordinating_DNA-binding_domains	C2H2_zinc_finger_factors	no_tissue-specific
ZBTB24	-	Monomer_or_homomultimer	High_specificity_DNA-binding_protein	pioneer	Zinc-coordinating_DNA-binding_domains	C2H2_zinc_finger_factors	-
ZBTB25	-	Monomer_or_homomultimer	High_specificity_DNA-binding_protein	pioneer	Zinc-coordinating_DNA-binding_domains	C2H2_zinc_finger_factors	-
ZBTB26	-	Monomer_or_homomultimer	High_specificity_DNA-binding_protein	migrant	Zinc-coordinating_DNA-binding_domains	C2H2_zinc_finger_factors	no_tissue-specific
ZBTB32	dual	Monomer_or_homomultimer	High_specificity_DNA-binding_protein	pioneer	Zinc-coordinating_DNA-binding_domains	C2H2_zinc_finger_factors	tissue-specific
ZBTB33	dual	Monomer_or_homomultimer	High_specificity_DNA-binding_protein	pioneer	Zinc-coordinating_DNA-binding_domains	C2H2_zinc_finger_factors	no_tissue-specific
ZBTB34	-	Monomer_or_homomultimer	High_specificity_DNA-binding_protein	pioneer	Zinc-coordinating_DNA-binding_domains	C2H2_zinc_finger_factors	-
ZBTB37	-	Monomer_or_homomultimer	High_specificity_DNA-binding_protein	pioneer	Zinc-coordinating_DNA-binding_domains	C2H2_zinc_finger_factors	-
ZBTB38	dual	Monomer_or_homomultimer	High_specificity_DNA-binding_protein	pioneer	Zinc-coordinating_DNA-binding_domains	C2H2_zinc_finger_factors	no_tissue-specific
ZBTB39	-	Monomer_or_homomultimer	High_specificity_DNA-binding_protein	pioneer	Zinc-coordinating_DNA-binding_domains	C2H2_zinc_finger_factors	-
ZBTB4	repressors	Monomer_or_homomultimer	High_specificity_DNA-binding_protein	-	Zinc-coordinating_DNA-binding_domains	C2H2_zinc_finger_factors	no_tissue-specific
ZBTB40	-	Monomer_or_homomultimer	High_specificity_DNA-binding_protein	pioneer	Zinc-coordinating_DNA-binding_domains	C2H2_zinc_finger_factors	no_tissue-specific
ZBTB41	-	Monomer_or_homomultimer	High_specificity_DNA-binding_protein	-	Zinc-coordinating_DNA-binding_domains	C2H2_zinc_finger_factors	-
ZBTB42	-	Monomer_or_homomultimer	High_specificity_DNA-binding_protein	-	Zinc-coordinating_DNA-binding_domains	C2H2_zinc_finger_factors	-
ZBTB43	-	Monomer_or_homomultimer	High_specificity_DNA-binding_protein	pioneer	Zinc-coordinating_DNA-binding_domains	C2H2_zinc_finger_factors	no_tissue-specific
ZBTB44	-	Monomer_or_homomultimer	High_specificity_DNA-binding_protein	-	Zinc-coordinating_DNA-binding_domains	C2H2_zinc_finger_factors	no_tissue-specific
ZBTB45	-	Monomer_or_homomultimer	High_specificity_DNA-binding_protein	pioneer	Zinc-coordinating_DNA-binding_domains	C2H2_zinc_finger_factors	no_tissue-specific
ZBTB46	-	Monomer_or_homomultimer	High_specificity_DNA-binding_protein	pioneer	Zinc-coordinating_DNA-binding_domains	C2H2_zinc_finger_factors	-
ZBTB47	-	Monomer_or_homomultimer	High_specificity_DNA-binding_protein	-	Zinc-coordinating_DNA-binding_domains	C2H2_zinc_finger_factors	no_tissue-specific
ZBTB48	-	Monomer_or_homomultimer	High_specificity_DNA-binding_protein	migrant	Zinc-coordinating_DNA-binding_domains	C2H2_zinc_finger_factors	no_tissue-specific
ZBTB49	-	Monomer_or_homomultimer	High_specificity_DNA-binding_protein	-	Zinc-coordinating_DNA-binding_domains	C2H2_zinc_finger_factors	-
ZBTB5	-	Monomer_or_homomultimer	High_specificity_DNA-binding_protein	pioneer	Zinc-coordinating_DNA-binding_domains	C2H2_zinc_finger_factors	no_tissue-specific
ZBTB6	-	Monomer_or_homomultimer	High_specificity_DNA-binding_protein	pioneer	Zinc-coordinating_DNA-binding_domains	C2H2_zinc_finger_factors	-
ZBTB7A	repressors	Monomer_or_homomultimer	High_specificity_DNA-binding_protein	pioneer	Zinc-coordinating_DNA-binding_domains	C2H2_zinc_finger_factors	no_tissue-specific
ZBTB7B	repressors	Monomer_or_homomultimer	High_specificity_DNA-binding_protein	pioneer	Zinc-coordinating_DNA-binding_domains	C2H2_zinc_finger_factors	no_tissue-specific
ZBTB7C	-	Monomer_or_homomultimer	High_specificity_DNA-binding_protein	-	Zinc-coordinating_DNA-binding_domains	C2H2_zinc_finger_factors	-
ZBTB8B	-	Monomer_or_homomultimer	High_specificity_DNA-binding_protein	-	Zinc-coordinating_DNA-binding_domains	C2H2_zinc_finger_factors	-
ZC3H4	-	-	Not_a_DNA_binding_protein	migrant	Zinc-coordinating_DNA-binding_domains	C3H_zinc_finger_factors	no_tissue-specific
ZC3H6	-	-	Not_a_DNA_binding_protein	-	Zinc-coordinating_DNA-binding_domains	C3H_zinc_finger_factors	-
ZC3H8	repressors	Monomer_or_homomultimer	High_specificity_DNA-binding_protein	-	Zinc-coordinating_DNA-binding_domains	C3H_zinc_finger_factors	no_tissue-specific
ZEB1	repressors	Monomer_or_homomultimer	High_specificity_DNA-binding_protein	migrant	Helix-turn-helix_domains	Homeo_domain_factors	no_tissue-specific
ZEB2	repressors	Monomer_or_homomultimer	High_specificity_DNA-binding_protein	migrant	Helix-turn-helix_domains	Homeo_domain_factors	-
ZFAT	-	Monomer_or_homomultimer	High_specificity_DNA-binding_protein	-	Zinc-coordinating_DNA-binding_domains	C2H2_zinc_finger_factors	-
ZFHX2	-	Monomer_or_homomultimer	High_specificity_DNA-binding_protein	migrant	Helix-turn-helix_domains	Homeo_domain_factors	tissue-specific
ZFHX3	dual	Monomer_or_homomultimer	High_specificity_DNA-binding_protein	migrant	Helix-turn-helix_domains	Homeo_domain_factors	-
ZFHX4	-	Monomer_or_homomultimer	High_specificity_DNA-binding_protein	-	Helix-turn-helix_domains	Homeo_domain_factors	-
ZFP1	-	Monomer_or_homomultimer	High_specificity_DNA-binding_protein	migrant	Zinc-coordinating_DNA-binding_domains	C2H2_zinc_finger_factors	-
ZFP14	-	Monomer_or_homomultimer	High_specificity_DNA-binding_protein	pioneer	Zinc-coordinating_DNA-binding_domains	C2H2_zinc_finger_factors	-
ZFP2	-	Monomer_or_homomultimer	High_specificity_DNA-binding_protein	migrant	Zinc-coordinating_DNA-binding_domains	C2H2_zinc_finger_factors	-
ZFP28	-	Monomer_or_homomultimer	High_specificity_DNA-binding_protein	pioneer	Zinc-coordinating_DNA-binding_domains	C2H2_zinc_finger_factors	-
ZFP3	-	Monomer_or_homomultimer	High_specificity_DNA-binding_protein	-	Zinc-coordinating_DNA-binding_domains	C2H2_zinc_finger_factors	-
ZFP30	-	Monomer_or_homomultimer	High_specificity_DNA-binding_protein	pioneer	Zinc-coordinating_DNA-binding_domains	C2H2_zinc_finger_factors	-
ZFP37	-	Monomer_or_homomultimer	High_specificity_DNA-binding_protein	pioneer	Zinc-coordinating_DNA-binding_domains	C2H2_zinc_finger_factors	tissue-specific
ZFP41	-	Monomer_or_homomultimer	High_specificity_DNA-binding_protein	pioneer	Zinc-coordinating_DNA-binding_domains	C2H2_zinc_finger_factors	-
ZFP42	-	Monomer_or_homomultimer	High_specificity_DNA-binding_protein	pioneer	Zinc-coordinating_DNA-binding_domains	C2H2_zinc_finger_factors	tissue-specific
ZFP57	-	Monomer_or_homomultimer	High_specificity_DNA-binding_protein	pioneer	Zinc-coordinating_DNA-binding_domains	C2H2_zinc_finger_factors	-
ZFP62	-	Monomer_or_homomultimer	High_specificity_DNA-binding_protein	pioneer	Zinc-coordinating_DNA-binding_domains	C2H2_zinc_finger_factors	no_tissue-specific
ZFP64	-	Monomer_or_homomultimer	High_specificity_DNA-binding_protein	pioneer	Zinc-coordinating_DNA-binding_domains	C2H2_zinc_finger_factors	-
ZFP69	-	Monomer_or_homomultimer	High_specificity_DNA-binding_protein	-	Zinc-coordinating_DNA-binding_domains	C2H2_zinc_finger_factors	-
ZFP69B	-	Monomer_or_homomultimer	High_specificity_DNA-binding_protein	-	Zinc-coordinating_DNA-binding_domains	C2H2_zinc_finger_factors	-
ZFP82	-	Monomer_or_homomultimer	High_specificity_DNA-binding_protein	pioneer	Zinc-coordinating_DNA-binding_domains	C2H2_zinc_finger_factors	tissue-specific
ZFP90	-	Monomer_or_homomultimer	High_specificity_DNA-binding_protein	migrant	Zinc-coordinating_DNA-binding_domains	C2H2_zinc_finger_factors	-
ZFP91	-	Monomer_or_homomultimer	High_specificity_DNA-binding_protein	pioneer	Zinc-coordinating_DNA-binding_domains	C2H2_zinc_finger_factors	no_tissue-specific
ZFP92	-	Monomer_or_homomultimer	High_specificity_DNA-binding_protein	-	Zinc-coordinating_DNA-binding_domains	C2H2_zinc_finger_factors	-
ZFPM1	dual	Monomer_or_homomultimer	High_specificity_DNA-binding_protein	settler	Zinc-coordinating_DNA-binding_domains	C2HC_zinc_finger_factors	-
ZFPM2	dual	Monomer_or_homomultimer	High_specificity_DNA-binding_protein	migrant	Zinc-coordinating_DNA-binding_domains	C2HC_zinc_finger_factors	-
ZFX	-	Monomer_or_homomultimer	High_specificity_DNA-binding_protein	pioneer	Zinc-coordinating_DNA-binding_domains	C2H2_zinc_finger_factors	no_tissue-specific
ZFY	activators	Monomer_or_homomultimer	High_specificity_DNA-binding_protein	migrant	Zinc-coordinating_DNA-binding_domains	C2H2_zinc_finger_factors	tissue-specific
ZGLP1	repressors	Monomer_or_homomultimer	High_specificity_DNA-binding_protein	-	Zinc-coordinating_DNA-binding_domains	Other_C4_zinc_finger-type_factors	-
ZGPAT	repressors	Monomer_or_homomultimer	High_specificity_DNA-binding_protein	-	Zinc-coordinating_DNA-binding_domains	C3H_zinc_finger_factors	no_tissue-specific
ZHX1	repressors	-	High_specificity_DNA-binding_protein	migrant	Helix-turn-helix_domains	Homeo_domain_factors	no_tissue-specific
ZHX2	repressors	-	High_specificity_DNA-binding_protein	migrant	Helix-turn-helix_domains	Homeo_domain_factors	no_tissue-specific
ZHX3	repressors	Monomer_or_homomultimer	High_specificity_DNA-binding_protein	migrant	Helix-turn-helix_domains	Homeo_domain_factors	no_tissue-specific
ZIC1	activators	Monomer_or_homomultimer	High_specificity_DNA-binding_protein	pioneer	Zinc-coordinating_DNA-binding_domains	C2H2_zinc_finger_factors	tissue-specific
ZIC2	dual	Monomer_or_homomultimer	High_specificity_DNA-binding_protein	pioneer	Zinc-coordinating_DNA-binding_domains	C2H2_zinc_finger_factors	tissue-specific
ZIC3	activators	Monomer_or_homomultimer	High_specificity_DNA-binding_protein	migrant	Zinc-coordinating_DNA-binding_domains	C2H2_zinc_finger_factors	-
ZIC4	-	Monomer_or_homomultimer	High_specificity_DNA-binding_protein	-	Zinc-coordinating_DNA-binding_domains	C2H2_zinc_finger_factors	-
ZIC5	-	Monomer_or_homomultimer	High_specificity_DNA-binding_protein	-	Zinc-coordinating_DNA-binding_domains	C2H2_zinc_finger_factors	tissue-specific
ZIK1	-	Monomer_or_homomultimer	High_specificity_DNA-binding_protein	-	Zinc-coordinating_DNA-binding_domains	C2H2_zinc_finger_factors	-
ZIM2	-	Monomer_or_homomultimer	High_specificity_DNA-binding_protein	migrant	Zinc-coordinating_DNA-binding_domains	C2H2_zinc_finger_factors	tissue-specific
ZIM3	-	Monomer_or_homomultimer	High_specificity_DNA-binding_protein	pioneer	Zinc-coordinating_DNA-binding_domains	C2H2_zinc_finger_factors	-
ZKSCAN1	-	Monomer_or_homomultimer	High_specificity_DNA-binding_protein	pioneer	Zinc-coordinating_DNA-binding_domains	C2H2_zinc_finger_factors	no_tissue-specific
ZKSCAN2	-	Monomer_or_homomultimer	High_specificity_DNA-binding_protein	-	Zinc-coordinating_DNA-binding_domains	C2H2_zinc_finger_factors	-
ZKSCAN3	dual	Monomer_or_homomultimer	High_specificity_DNA-binding_protein	migrant	Zinc-coordinating_DNA-binding_domains	C2H2_zinc_finger_factors	-
ZKSCAN4	activators	Monomer_or_homomultimer	High_specificity_DNA-binding_protein	pioneer	Zinc-coordinating_DNA-binding_domains	C2H2_zinc_finger_factors	-
ZKSCAN5	-	Monomer_or_homomultimer	High_specificity_DNA-binding_protein	migrant	Zinc-coordinating_DNA-binding_domains	C2H2_zinc_finger_factors	no_tissue-specific
ZKSCAN7	-	Monomer_or_homomultimer	High_specificity_DNA-binding_protein	pioneer	Zinc-coordinating_DNA-binding_domains	C2H2_zinc_finger_factors	-
ZKSCAN8	-	Monomer_or_homomultimer	High_specificity_DNA-binding_protein	pioneer	Zinc-coordinating_DNA-binding_domains	C2H2_zinc_finger_factors	no_tissue-specific
ZNF10	-	Monomer_or_homomultimer	High_specificity_DNA-binding_protein	migrant	Zinc-coordinating_DNA-binding_domains	C2H2_zinc_finger_factors	no_tissue-specific
ZNF100	-	Monomer_or_homomultimer	High_specificity_DNA-binding_protein	pioneer	Zinc-coordinating_DNA-binding_domains	C2H2_zinc_finger_factors	-
ZNF101	-	Monomer_or_homomultimer	High_specificity_DNA-binding_protein	settler	Zinc-coordinating_DNA-binding_domains	C2H2_zinc_finger_factors	-
ZNF107	-	Monomer_or_homomultimer	High_specificity_DNA-binding_protein	migrant	Zinc-coordinating_DNA-binding_domains	C2H2_zinc_finger_factors	-
ZNF112	-	Monomer_or_homomultimer	High_specificity_DNA-binding_protein	settler	Zinc-coordinating_DNA-binding_domains	C2H2_zinc_finger_factors	-
ZNF114	-	Monomer_or_homomultimer	High_specificity_DNA-binding_protein	pioneer	Zinc-coordinating_DNA-binding_domains	C2H2_zinc_finger_factors	tissue-specific
ZNF117	-	Monomer_or_homomultimer	High_specificity_DNA-binding_protein	pioneer	Zinc-coordinating_DNA-binding_domains	C2H2_zinc_finger_factors	-
ZNF121	-	Monomer_or_homomultimer	High_specificity_DNA-binding_protein	migrant	Zinc-coordinating_DNA-binding_domains	C2H2_zinc_finger_factors	no_tissue-specific
ZNF124	-	Monomer_or_homomultimer	High_specificity_DNA-binding_protein	pioneer	Zinc-coordinating_DNA-binding_domains	C2H2_zinc_finger_factors	-
ZNF131	-	Monomer_or_homomultimer	High_specificity_DNA-binding_protein	pioneer	Zinc-coordinating_DNA-binding_domains	C2H2_zinc_finger_factors	no_tissue-specific
ZNF132	-	Monomer_or_homomultimer	High_specificity_DNA-binding_protein	settler	Zinc-coordinating_DNA-binding_domains	C2H2_zinc_finger_factors	-
ZNF133	-	Monomer_or_homomultimer	High_specificity_DNA-binding_protein	migrant	Zinc-coordinating_DNA-binding_domains	C2H2_zinc_finger_factors	no_tissue-specific
ZNF134	-	Monomer_or_homomultimer	High_specificity_DNA-binding_protein	settler	Zinc-coordinating_DNA-binding_domains	C2H2_zinc_finger_factors	no_tissue-specific
ZNF135	-	Monomer_or_homomultimer	High_specificity_DNA-binding_protein	pioneer	Zinc-coordinating_DNA-binding_domains	C2H2_zinc_finger_factors	-
ZNF136	-	Monomer_or_homomultimer	High_specificity_DNA-binding_protein	pioneer	Zinc-coordinating_DNA-binding_domains	C2H2_zinc_finger_factors	-
ZNF137P	-	-	Not_a_DNA_binding_protein	migrant	Zinc-coordinating_DNA-binding_domains	C2H2_zinc_finger_factors	-
ZNF138	-	Monomer_or_homomultimer	High_specificity_DNA-binding_protein	pioneer	Zinc-coordinating_DNA-binding_domains	C2H2_zinc_finger_factors	-
ZNF14	-	Monomer_or_homomultimer	High_specificity_DNA-binding_protein	pioneer	Zinc-coordinating_DNA-binding_domains	C2H2_zinc_finger_factors	-
ZNF140	-	Monomer_or_homomultimer	High_specificity_DNA-binding_protein	migrant	Zinc-coordinating_DNA-binding_domains	C2H2_zinc_finger_factors	-
ZNF141	-	Monomer_or_homomultimer	High_specificity_DNA-binding_protein	pioneer	Zinc-coordinating_DNA-binding_domains	C2H2_zinc_finger_factors	-
ZNF142	-	Monomer_or_homomultimer	High_specificity_DNA-binding_protein	pioneer	Zinc-coordinating_DNA-binding_domains	C2H2_zinc_finger_factors	no_tissue-specific
ZNF143	activators	Monomer_or_homomultimer	High_specificity_DNA-binding_protein	migrant	Zinc-coordinating_DNA-binding_domains	C2H2_zinc_finger_factors	no_tissue-specific
ZNF146	-	Monomer_or_homomultimer	High_specificity_DNA-binding_protein	pioneer	Zinc-coordinating_DNA-binding_domains	C2H2_zinc_finger_factors	no_tissue-specific
ZNF148	repressors	Monomer_or_homomultimer	High_specificity_DNA-binding_protein	pioneer	Zinc-coordinating_DNA-binding_domains	C2H2_zinc_finger_factors	no_tissue-specific
ZNF154	-	Monomer_or_homomultimer	High_specificity_DNA-binding_protein	pioneer	Zinc-coordinating_DNA-binding_domains	C2H2_zinc_finger_factors	-
ZNF155	-	Monomer_or_homomultimer	High_specificity_DNA-binding_protein	migrant	Zinc-coordinating_DNA-binding_domains	C2H2_zinc_finger_factors	tissue-specific
ZNF157	-	Monomer_or_homomultimer	High_specificity_DNA-binding_protein	pioneer	Zinc-coordinating_DNA-binding_domains	C2H2_zinc_finger_factors	-
ZNF16	activators	Monomer_or_homomultimer	High_specificity_DNA-binding_protein	migrant	Zinc-coordinating_DNA-binding_domains	C2H2_zinc_finger_factors	-
ZNF160	-	Monomer_or_homomultimer	High_specificity_DNA-binding_protein	pioneer	Zinc-coordinating_DNA-binding_domains	C2H2_zinc_finger_factors	no_tissue-specific
ZNF165	-	Monomer_or_homomultimer	High_specificity_DNA-binding_protein	pioneer	Zinc-coordinating_DNA-binding_domains	C2H2_zinc_finger_factors	-
ZNF169	-	Monomer_or_homomultimer	High_specificity_DNA-binding_protein	pioneer	Zinc-coordinating_DNA-binding_domains	C2H2_zinc_finger_factors	-
ZNF17	-	Monomer_or_homomultimer	High_specificity_DNA-binding_protein	migrant	Zinc-coordinating_DNA-binding_domains	C2H2_zinc_finger_factors	-
ZNF174	repressors	Monomer_or_homomultimer	High_specificity_DNA-binding_protein	pioneer	Zinc-coordinating_DNA-binding_domains	C2H2_zinc_finger_factors	no_tissue-specific
ZNF175	-	Monomer_or_homomultimer	High_specificity_DNA-binding_protein	pioneer	Zinc-coordinating_DNA-binding_domains	C2H2_zinc_finger_factors	-
ZNF177	-	Monomer_or_homomultimer	High_specificity_DNA-binding_protein	pioneer	Zinc-coordinating_DNA-binding_domains	C2H2_zinc_finger_factors	-
ZNF18	-	Monomer_or_homomultimer	High_specificity_DNA-binding_protein	pioneer	Zinc-coordinating_DNA-binding_domains	C2H2_zinc_finger_factors	no_tissue-specific
ZNF180	-	Monomer_or_homomultimer	High_specificity_DNA-binding_protein	pioneer	Zinc-coordinating_DNA-binding_domains	C2H2_zinc_finger_factors	-
ZNF181	-	Monomer_or_homomultimer	High_specificity_DNA-binding_protein	-	Zinc-coordinating_DNA-binding_domains	C2H2_zinc_finger_factors	no_tissue-specific
ZNF182	-	Monomer_or_homomultimer	High_specificity_DNA-binding_protein	pioneer	Zinc-coordinating_DNA-binding_domains	C2H2_zinc_finger_factors	no_tissue-specific
ZNF184	-	Monomer_or_homomultimer	High_specificity_DNA-binding_protein	migrant	Zinc-coordinating_DNA-binding_domains	C2H2_zinc_finger_factors	-
ZNF189	-	Monomer_or_homomultimer	High_specificity_DNA-binding_protein	pioneer	Zinc-coordinating_DNA-binding_domains	C2H2_zinc_finger_factors	no_tissue-specific
ZNF19	-	Monomer_or_homomultimer	High_specificity_DNA-binding_protein	migrant	Zinc-coordinating_DNA-binding_domains	C2H2_zinc_finger_factors	tissue-specific
ZNF195	-	Monomer_or_homomultimer	High_specificity_DNA-binding_protein	pioneer	Zinc-coordinating_DNA-binding_domains	C2H2_zinc_finger_factors	no_tissue-specific
ZNF197	-	Monomer_or_homomultimer	High_specificity_DNA-binding_protein	migrant	Zinc-coordinating_DNA-binding_domains	C2H2_zinc_finger_factors	no_tissue-specific
ZNF2	-	Monomer_or_homomultimer	High_specificity_DNA-binding_protein	migrant	Zinc-coordinating_DNA-binding_domains	C2H2_zinc_finger_factors	-
ZNF20	-	Monomer_or_homomultimer	High_specificity_DNA-binding_protein	pioneer	Zinc-coordinating_DNA-binding_domains	C2H2_zinc_finger_factors	-
ZNF200	-	Monomer_or_homomultimer	High_specificity_DNA-binding_protein	pioneer	Zinc-coordinating_DNA-binding_domains	C2H2_zinc_finger_factors	-
ZNF202	repressors	Monomer_or_homomultimer	High_specificity_DNA-binding_protein	migrant	Zinc-coordinating_DNA-binding_domains	C2H2_zinc_finger_factors	no_tissue-specific
ZNF205	-	Monomer_or_homomultimer	High_specificity_DNA-binding_protein	pioneer	Zinc-coordinating_DNA-binding_domains	C2H2_zinc_finger_factors	no_tissue-specific
ZNF208	-	Monomer_or_homomultimer	High_specificity_DNA-binding_protein	pioneer	Zinc-coordinating_DNA-binding_domains	C2H2_zinc_finger_factors	tissue-specific
ZNF211	-	Monomer_or_homomultimer	High_specificity_DNA-binding_protein	settler	Zinc-coordinating_DNA-binding_domains	C2H2_zinc_finger_factors	no_tissue-specific
ZNF212	-	Monomer_or_homomultimer	High_specificity_DNA-binding_protein	migrant	Zinc-coordinating_DNA-binding_domains	C2H2_zinc_finger_factors	no_tissue-specific
ZNF213	-	Monomer_or_homomultimer	High_specificity_DNA-binding_protein	migrant	Zinc-coordinating_DNA-binding_domains	C2H2_zinc_finger_factors	no_tissue-specific
ZNF214	-	Monomer_or_homomultimer	High_specificity_DNA-binding_protein	migrant	Zinc-coordinating_DNA-binding_domains	C2H2_zinc_finger_factors	-
ZNF215	-	Monomer_or_homomultimer	High_specificity_DNA-binding_protein	migrant	Zinc-coordinating_DNA-binding_domains	C2H2_zinc_finger_factors	tissue-specific
ZNF217	-	Monomer_or_homomultimer	High_specificity_DNA-binding_protein	pioneer	Zinc-coordinating_DNA-binding_domains	C2H2_zinc_finger_factors	no_tissue-specific
ZNF219	dual	Monomer_or_homomultimer	High_specificity_DNA-binding_protein	pioneer	Zinc-coordinating_DNA-binding_domains	C2H2_zinc_finger_factors	no_tissue-specific
ZNF22	-	Monomer_or_homomultimer	High_specificity_DNA-binding_protein	migrant	Zinc-coordinating_DNA-binding_domains	C2H2_zinc_finger_factors	no_tissue-specific
ZNF221	-	Monomer_or_homomultimer	High_specificity_DNA-binding_protein	pioneer	Zinc-coordinating_DNA-binding_domains	C2H2_zinc_finger_factors	-
ZNF222	-	Monomer_or_homomultimer	High_specificity_DNA-binding_protein	pioneer	Zinc-coordinating_DNA-binding_domains	C2H2_zinc_finger_factors	-
ZNF223	-	Monomer_or_homomultimer	High_specificity_DNA-binding_protein	pioneer	Zinc-coordinating_DNA-binding_domains	C2H2_zinc_finger_factors	-
ZNF224	repressors	Monomer_or_homomultimer	High_specificity_DNA-binding_protein	migrant	Zinc-coordinating_DNA-binding_domains	C2H2_zinc_finger_factors	-
ZNF225	-	Monomer_or_homomultimer	High_specificity_DNA-binding_protein	pioneer	Zinc-coordinating_DNA-binding_domains	C2H2_zinc_finger_factors	-
ZNF226	-	Monomer_or_homomultimer	High_specificity_DNA-binding_protein	migrant	Zinc-coordinating_DNA-binding_domains	C2H2_zinc_finger_factors	no_tissue-specific
ZNF227	-	Monomer_or_homomultimer	High_specificity_DNA-binding_protein	pioneer	Zinc-coordinating_DNA-binding_domains	C2H2_zinc_finger_factors	-
ZNF229	-	Monomer_or_homomultimer	High_specificity_DNA-binding_protein	pioneer	Zinc-coordinating_DNA-binding_domains	C2H2_zinc_finger_factors	-
ZNF23	-	Monomer_or_homomultimer	High_specificity_DNA-binding_protein	migrant	Zinc-coordinating_DNA-binding_domains	C2H2_zinc_finger_factors	-
ZNF230	-	Monomer_or_homomultimer	High_specificity_DNA-binding_protein	pioneer	Zinc-coordinating_DNA-binding_domains	C2H2_zinc_finger_factors	-
ZNF232	-	Monomer_or_homomultimer	High_specificity_DNA-binding_protein	pioneer	Zinc-coordinating_DNA-binding_domains	C2H2_zinc_finger_factors	no_tissue-specific
ZNF233	-	Monomer_or_homomultimer	High_specificity_DNA-binding_protein	-	Zinc-coordinating_DNA-binding_domains	C2H2_zinc_finger_factors	tissue-specific
ZNF234	-	Monomer_or_homomultimer	High_specificity_DNA-binding_protein	pioneer	Zinc-coordinating_DNA-binding_domains	C2H2_zinc_finger_factors	-
ZNF235	-	Monomer_or_homomultimer	High_specificity_DNA-binding_protein	pioneer	Zinc-coordinating_DNA-binding_domains	C2H2_zinc_finger_factors	-
ZNF236	-	Monomer_or_homomultimer	High_specificity_DNA-binding_protein	pioneer	Zinc-coordinating_DNA-binding_domains	C2H2_zinc_finger_factors	-
ZNF239	-	Monomer_or_homomultimer	High_specificity_DNA-binding_protein	pioneer	Zinc-coordinating_DNA-binding_domains	C2H2_zinc_finger_factors	-
ZNF24	repressors	Monomer_or_homomultimer	High_specificity_DNA-binding_protein	pioneer	Zinc-coordinating_DNA-binding_domains	C2H2_zinc_finger_factors	no_tissue-specific
ZNF248	-	Monomer_or_homomultimer	High_specificity_DNA-binding_protein	settler	Zinc-coordinating_DNA-binding_domains	C2H2_zinc_finger_factors	no_tissue-specific
ZNF25	-	Monomer_or_homomultimer	High_specificity_DNA-binding_protein	migrant	Zinc-coordinating_DNA-binding_domains	C2H2_zinc_finger_factors	no_tissue-specific
ZNF250	-	Monomer_or_homomultimer	High_specificity_DNA-binding_protein	pioneer	Zinc-coordinating_DNA-binding_domains	C2H2_zinc_finger_factors	-
ZNF251	-	Monomer_or_homomultimer	High_specificity_DNA-binding_protein	settler	Zinc-coordinating_DNA-binding_domains	C2H2_zinc_finger_factors	no_tissue-specific
ZNF253	-	Monomer_or_homomultimer	High_specificity_DNA-binding_protein	migrant	Zinc-coordinating_DNA-binding_domains	C2H2_zinc_finger_factors	-
ZNF254	-	Monomer_or_homomultimer	High_specificity_DNA-binding_protein	migrant	Zinc-coordinating_DNA-binding_domains	C2H2_zinc_finger_factors	-
ZNF256	repressors	Monomer_or_homomultimer	High_specificity_DNA-binding_protein	settler	Zinc-coordinating_DNA-binding_domains	C2H2_zinc_finger_factors	-
ZNF257	-	Monomer_or_homomultimer	High_specificity_DNA-binding_protein	pioneer	Zinc-coordinating_DNA-binding_domains	C2H2_zinc_finger_factors	tissue-specific
ZNF26	-	Monomer_or_homomultimer	High_specificity_DNA-binding_protein	pioneer	Zinc-coordinating_DNA-binding_domains	C2H2_zinc_finger_factors	-
ZNF260	activators	Monomer_or_homomultimer	High_specificity_DNA-binding_protein	-	Zinc-coordinating_DNA-binding_domains	C2H2_zinc_finger_factors	-
ZNF263	repressors	Monomer_or_homomultimer	High_specificity_DNA-binding_protein	migrant	Zinc-coordinating_DNA-binding_domains	C2H2_zinc_finger_factors	no_tissue-specific
ZNF264	-	Monomer_or_homomultimer	High_specificity_DNA-binding_protein	pioneer	Zinc-coordinating_DNA-binding_domains	C2H2_zinc_finger_factors	-
ZNF266	-	Monomer_or_homomultimer	High_specificity_DNA-binding_protein	pioneer	Zinc-coordinating_DNA-binding_domains	C2H2_zinc_finger_factors	no_tissue-specific
ZNF267	-	Monomer_or_homomultimer	High_specificity_DNA-binding_protein	pioneer	Zinc-coordinating_DNA-binding_domains	C2H2_zinc_finger_factors	-
ZNF268	repressors	Monomer_or_homomultimer	High_specificity_DNA-binding_protein	migrant	Zinc-coordinating_DNA-binding_domains	C2H2_zinc_finger_factors	-
ZNF273	-	Monomer_or_homomultimer	High_specificity_DNA-binding_protein	pioneer	Zinc-coordinating_DNA-binding_domains	C2H2_zinc_finger_factors	-
ZNF274	repressors	Monomer_or_homomultimer	High_specificity_DNA-binding_protein	migrant	Zinc-coordinating_DNA-binding_domains	C2H2_zinc_finger_factors	no_tissue-specific
ZNF275	-	Monomer_or_homomultimer	High_specificity_DNA-binding_protein	migrant	Zinc-coordinating_DNA-binding_domains	C2H2_zinc_finger_factors	no_tissue-specific
ZNF276	-	Monomer_or_homomultimer	High_specificity_DNA-binding_protein	pioneer	Zinc-coordinating_DNA-binding_domains	C2H2_zinc_finger_factors	no_tissue-specific
ZNF277	-	Monomer_or_homomultimer	High_specificity_DNA-binding_protein	migrant	Zinc-coordinating_DNA-binding_domains	C2H2_zinc_finger_factors	no_tissue-specific
ZNF28	-	Monomer_or_homomultimer	High_specificity_DNA-binding_protein	-	Zinc-coordinating_DNA-binding_domains	C2H2_zinc_finger_factors	-
ZNF280A	-	Monomer_or_homomultimer	High_specificity_DNA-binding_protein	migrant	Zinc-coordinating_DNA-binding_domains	C2H2_zinc_finger_factors	-
ZNF280B	-	Monomer_or_homomultimer	High_specificity_DNA-binding_protein	pioneer	Zinc-coordinating_DNA-binding_domains	C2H2_zinc_finger_factors	tissue-specific
ZNF280C	-	Monomer_or_homomultimer	High_specificity_DNA-binding_protein	-	Zinc-coordinating_DNA-binding_domains	C2H2_zinc_finger_factors	-
ZNF280D	-	Monomer_or_homomultimer	High_specificity_DNA-binding_protein	-	Zinc-coordinating_DNA-binding_domains	C2H2_zinc_finger_factors	no_tissue-specific
ZNF281	repressors	Monomer_or_homomultimer	High_specificity_DNA-binding_protein	pioneer	Zinc-coordinating_DNA-binding_domains	C2H2_zinc_finger_factors	no_tissue-specific
ZNF282	-	Monomer_or_homomultimer	High_specificity_DNA-binding_protein	pioneer	Zinc-coordinating_DNA-binding_domains	C2H2_zinc_finger_factors	no_tissue-specific
ZNF283	-	Monomer_or_homomultimer	High_specificity_DNA-binding_protein	pioneer	Zinc-coordinating_DNA-binding_domains	C2H2_zinc_finger_factors	tissue-specific
ZNF284	-	Monomer_or_homomultimer	High_specificity_DNA-binding_protein	-	Zinc-coordinating_DNA-binding_domains	C2H2_zinc_finger_factors	tissue-specific
ZNF285	-	Monomer_or_homomultimer	High_specificity_DNA-binding_protein	migrant	Zinc-coordinating_DNA-binding_domains	C2H2_zinc_finger_factors	-
ZNF286A	-	Monomer_or_homomultimer	High_specificity_DNA-binding_protein	pioneer	Zinc-coordinating_DNA-binding_domains	C2H2_zinc_finger_factors	tissue-specific
ZNF286B	-	Monomer_or_homomultimer	High_specificity_DNA-binding_protein	-	Zinc-coordinating_DNA-binding_domains	C2H2_zinc_finger_factors	-
ZNF287	-	Monomer_or_homomultimer	High_specificity_DNA-binding_protein	migrant	Zinc-coordinating_DNA-binding_domains	C2H2_zinc_finger_factors	-
ZNF292	-	Monomer_or_homomultimer	High_specificity_DNA-binding_protein	settler	Zinc-coordinating_DNA-binding_domains	C2H2_zinc_finger_factors	no_tissue-specific
ZNF296	-	Monomer_or_homomultimer	High_specificity_DNA-binding_protein	settler	Zinc-coordinating_DNA-binding_domains	C2H2_zinc_finger_factors	-
ZNF3	-	Monomer_or_homomultimer	High_specificity_DNA-binding_protein	migrant	Zinc-coordinating_DNA-binding_domains	C2H2_zinc_finger_factors	no_tissue-specific
ZNF30	-	Monomer_or_homomultimer	High_specificity_DNA-binding_protein	pioneer	Zinc-coordinating_DNA-binding_domains	C2H2_zinc_finger_factors	-
ZNF300	repressors	Monomer_or_homomultimer	High_specificity_DNA-binding_protein	pioneer	Zinc-coordinating_DNA-binding_domains	C2H2_zinc_finger_factors	-
ZNF302	-	Monomer_or_homomultimer	High_specificity_DNA-binding_protein	pioneer	Zinc-coordinating_DNA-binding_domains	C2H2_zinc_finger_factors	no_tissue-specific
ZNF304	repressors	Monomer_or_homomultimer	High_specificity_DNA-binding_protein	settler	Zinc-coordinating_DNA-binding_domains	C2H2_zinc_finger_factors	-
ZNF311	-	Monomer_or_homomultimer	High_specificity_DNA-binding_protein	pioneer	Zinc-coordinating_DNA-binding_domains	C2H2_zinc_finger_factors	-
ZNF316	-	Monomer_or_homomultimer	High_specificity_DNA-binding_protein	-	Zinc-coordinating_DNA-binding_domains	C2H2_zinc_finger_factors	no_tissue-specific
ZNF317	-	Monomer_or_homomultimer	High_specificity_DNA-binding_protein	migrant	Zinc-coordinating_DNA-binding_domains	C2H2_zinc_finger_factors	no_tissue-specific
ZNF319	-	Monomer_or_homomultimer	High_specificity_DNA-binding_protein	settler	Zinc-coordinating_DNA-binding_domains	C2H2_zinc_finger_factors	no_tissue-specific
ZNF32	-	Monomer_or_homomultimer	High_specificity_DNA-binding_protein	pioneer	Zinc-coordinating_DNA-binding_domains	C2H2_zinc_finger_factors	no_tissue-specific
ZNF320	-	Monomer_or_homomultimer	High_specificity_DNA-binding_protein	-	Zinc-coordinating_DNA-binding_domains	C2H2_zinc_finger_factors	-
ZNF322	-	Monomer_or_homomultimer	High_specificity_DNA-binding_protein	-	Zinc-coordinating_DNA-binding_domains	C2H2_zinc_finger_factors	no_tissue-specific
ZNF324	-	Monomer_or_homomultimer	High_specificity_DNA-binding_protein	pioneer	Zinc-coordinating_DNA-binding_domains	C2H2_zinc_finger_factors	-
ZNF324B	-	Monomer_or_homomultimer	High_specificity_DNA-binding_protein	-	Zinc-coordinating_DNA-binding_domains	C2H2_zinc_finger_factors	-
ZNF329	-	Monomer_or_homomultimer	High_specificity_DNA-binding_protein	-	Zinc-coordinating_DNA-binding_domains	C2H2_zinc_finger_factors	-
ZNF331	-	Monomer_or_homomultimer	High_specificity_DNA-binding_protein	pioneer	Zinc-coordinating_DNA-binding_domains	C2H2_zinc_finger_factors	no_tissue-specific
ZNF333	-	Monomer_or_homomultimer	High_specificity_DNA-binding_protein	migrant	Zinc-coordinating_DNA-binding_domains	C2H2_zinc_finger_factors	-
ZNF334	-	Monomer_or_homomultimer	High_specificity_DNA-binding_protein	settler	Zinc-coordinating_DNA-binding_domains	C2H2_zinc_finger_factors	-
ZNF335	activators	Monomer_or_homomultimer	High_specificity_DNA-binding_protein	settler	Zinc-coordinating_DNA-binding_domains	C2H2_zinc_finger_factors	no_tissue-specific
ZNF337	-	Monomer_or_homomultimer	High_specificity_DNA-binding_protein	pioneer	Zinc-coordinating_DNA-binding_domains	C2H2_zinc_finger_factors	-
ZNF33A	-	Monomer_or_homomultimer	High_specificity_DNA-binding_protein	migrant	Zinc-coordinating_DNA-binding_domains	C2H2_zinc_finger_factors	no_tissue-specific
ZNF33B	-	Monomer_or_homomultimer	High_specificity_DNA-binding_protein	pioneer	Zinc-coordinating_DNA-binding_domains	C2H2_zinc_finger_factors	-
ZNF34	-	Monomer_or_homomultimer	High_specificity_DNA-binding_protein	migrant	Zinc-coordinating_DNA-binding_domains	C2H2_zinc_finger_factors	no_tissue-specific
ZNF341	-	Monomer_or_homomultimer	High_specificity_DNA-binding_protein	settler	Zinc-coordinating_DNA-binding_domains	C2H2_zinc_finger_factors	-
ZNF343	-	Monomer_or_homomultimer	High_specificity_DNA-binding_protein	migrant	Zinc-coordinating_DNA-binding_domains	C2H2_zinc_finger_factors	no_tissue-specific
ZNF345	-	Monomer_or_homomultimer	High_specificity_DNA-binding_protein	pioneer	Zinc-coordinating_DNA-binding_domains	C2H2_zinc_finger_factors	-
ZNF347	-	Monomer_or_homomultimer	High_specificity_DNA-binding_protein	pioneer	Zinc-coordinating_DNA-binding_domains	C2H2_zinc_finger_factors	-
ZNF35	-	Monomer_or_homomultimer	High_specificity_DNA-binding_protein	migrant	Zinc-coordinating_DNA-binding_domains	C2H2_zinc_finger_factors	-
ZNF350	-	Monomer_or_homomultimer	High_specificity_DNA-binding_protein	pioneer	Zinc-coordinating_DNA-binding_domains	C2H2_zinc_finger_factors	-
ZNF354A	-	Monomer_or_homomultimer	High_specificity_DNA-binding_protein	pioneer	Zinc-coordinating_DNA-binding_domains	C2H2_zinc_finger_factors	no_tissue-specific
ZNF354B	-	Monomer_or_homomultimer	High_specificity_DNA-binding_protein	migrant	Zinc-coordinating_DNA-binding_domains	C2H2_zinc_finger_factors	no_tissue-specific
ZNF354C	repressors	Monomer_or_homomultimer	High_specificity_DNA-binding_protein	pioneer	Zinc-coordinating_DNA-binding_domains	C2H2_zinc_finger_factors	-
ZNF355P	-	-	Not_a_DNA_binding_protein	-	Zinc-coordinating_DNA-binding_domains	C2H2_zinc_finger_factors	-
ZNF358	-	Monomer_or_homomultimer	High_specificity_DNA-binding_protein	migrant	Zinc-coordinating_DNA-binding_domains	C2H2_zinc_finger_factors	no_tissue-specific
ZNF362	-	Monomer_or_homomultimer	High_specificity_DNA-binding_protein	-	Zinc-coordinating_DNA-binding_domains	C2H2_zinc_finger_factors	no_tissue-specific
ZNF366	-	Monomer_or_homomultimer	High_specificity_DNA-binding_protein	pioneer	Zinc-coordinating_DNA-binding_domains	C2H2_zinc_finger_factors	-
ZNF37A	-	Monomer_or_homomultimer	High_specificity_DNA-binding_protein	settler	Zinc-coordinating_DNA-binding_domains	C2H2_zinc_finger_factors	no_tissue-specific
ZNF382	repressors	Monomer_or_homomultimer	High_specificity_DNA-binding_protein	settler	Zinc-coordinating_DNA-binding_domains	C2H2_zinc_finger_factors	tissue-specific
ZNF383	repressors	Monomer_or_homomultimer	High_specificity_DNA-binding_protein	pioneer	Zinc-coordinating_DNA-binding_domains	C2H2_zinc_finger_factors	-
ZNF384	-	Monomer_or_homomultimer	High_specificity_DNA-binding_protein	migrant	Zinc-coordinating_DNA-binding_domains	C2H2_zinc_finger_factors	no_tissue-specific
ZNF391	-	Monomer_or_homomultimer	High_specificity_DNA-binding_protein	-	Zinc-coordinating_DNA-binding_domains	C2H2_zinc_finger_factors	-
ZNF394	-	Monomer_or_homomultimer	High_specificity_DNA-binding_protein	pioneer	Zinc-coordinating_DNA-binding_domains	C2H2_zinc_finger_factors	no_tissue-specific
ZNF396	repressors	Monomer_or_homomultimer	High_specificity_DNA-binding_protein	pioneer	Zinc-coordinating_DNA-binding_domains	C2H2_zinc_finger_factors	tissue-specific
ZNF397	repressors	Monomer_or_homomultimer	High_specificity_DNA-binding_protein	migrant	Zinc-coordinating_DNA-binding_domains	C2H2_zinc_finger_factors	no_tissue-specific
ZNF398	activators	Monomer_or_homomultimer	High_specificity_DNA-binding_protein	pioneer	Zinc-coordinating_DNA-binding_domains	C2H2_zinc_finger_factors	no_tissue-specific
ZNF404	-	Monomer_or_homomultimer	High_specificity_DNA-binding_protein	pioneer	Zinc-coordinating_DNA-binding_domains	C2H2_zinc_finger_factors	-
ZNF407	-	Monomer_or_homomultimer	High_specificity_DNA-binding_protein	pioneer	Zinc-coordinating_DNA-binding_domains	C2H2_zinc_finger_factors	-
ZNF408	-	Monomer_or_homomultimer	High_specificity_DNA-binding_protein	pioneer	Zinc-coordinating_DNA-binding_domains	C2H2_zinc_finger_factors	no_tissue-specific
ZNF41	-	Monomer_or_homomultimer	High_specificity_DNA-binding_protein	migrant	Zinc-coordinating_DNA-binding_domains	C2H2_zinc_finger_factors	no_tissue-specific
ZNF410	activators	Monomer_or_homomultimer	High_specificity_DNA-binding_protein	pioneer	Zinc-coordinating_DNA-binding_domains	C2H2_zinc_finger_factors	tissue-specific
ZNF414	-	Monomer_or_homomultimer	High_specificity_DNA-binding_protein	-	Zinc-coordinating_DNA-binding_domains	C2H2_zinc_finger_factors	no_tissue-specific
ZNF415	-	Monomer_or_homomultimer	High_specificity_DNA-binding_protein	-	Zinc-coordinating_DNA-binding_domains	C2H2_zinc_finger_factors	-
ZNF416	-	Monomer_or_homomultimer	High_specificity_DNA-binding_protein	pioneer	Zinc-coordinating_DNA-binding_domains	C2H2_zinc_finger_factors	-
ZNF417	-	Monomer_or_homomultimer	High_specificity_DNA-binding_protein	settler	Zinc-coordinating_DNA-binding_domains	C2H2_zinc_finger_factors	-
ZNF418	-	Monomer_or_homomultimer	High_specificity_DNA-binding_protein	settler	Zinc-coordinating_DNA-binding_domains	C2H2_zinc_finger_factors	-
ZNF419	-	Monomer_or_homomultimer	High_specificity_DNA-binding_protein	migrant	Zinc-coordinating_DNA-binding_domains	C2H2_zinc_finger_factors	-
ZNF420	-	Monomer_or_homomultimer	High_specificity_DNA-binding_protein	pioneer	Zinc-coordinating_DNA-binding_domains	C2H2_zinc_finger_factors	-
ZNF423	dual	Monomer_or_homomultimer	High_specificity_DNA-binding_protein	settler	Zinc-coordinating_DNA-binding_domains	C2H2_zinc_finger_factors	-
ZNF425	-	Monomer_or_homomultimer	High_specificity_DNA-binding_protein	-	Zinc-coordinating_DNA-binding_domains	C2H2_zinc_finger_factors	-
ZNF426	-	Monomer_or_homomultimer	High_specificity_DNA-binding_protein	pioneer	Zinc-coordinating_DNA-binding_domains	C2H2_zinc_finger_factors	-
ZNF429	-	Monomer_or_homomultimer	High_specificity_DNA-binding_protein	pioneer	Zinc-coordinating_DNA-binding_domains	C2H2_zinc_finger_factors	-
ZNF43	-	Monomer_or_homomultimer	High_specificity_DNA-binding_protein	migrant	Zinc-coordinating_DNA-binding_domains	C2H2_zinc_finger_factors	-
ZNF430	-	Monomer_or_homomultimer	High_specificity_DNA-binding_protein	pioneer	Zinc-coordinating_DNA-binding_domains	C2H2_zinc_finger_factors	-
ZNF431	repressors	Monomer_or_homomultimer	High_specificity_DNA-binding_protein	pioneer	Zinc-coordinating_DNA-binding_domains	C2H2_zinc_finger_factors	-
ZNF432	-	Monomer_or_homomultimer	High_specificity_DNA-binding_protein	pioneer	Zinc-coordinating_DNA-binding_domains	C2H2_zinc_finger_factors	-
ZNF433	-	Monomer_or_homomultimer	High_specificity_DNA-binding_protein	migrant	Zinc-coordinating_DNA-binding_domains	C2H2_zinc_finger_factors	-
ZNF436	repressors	Monomer_or_homomultimer	High_specificity_DNA-binding_protein	migrant	Zinc-coordinating_DNA-binding_domains	C2H2_zinc_finger_factors	no_tissue-specific
ZNF438	repressors	Monomer_or_homomultimer	High_specificity_DNA-binding_protein	-	Zinc-coordinating_DNA-binding_domains	C2H2_zinc_finger_factors	no_tissue-specific
ZNF439	-	Monomer_or_homomultimer	High_specificity_DNA-binding_protein	pioneer	Zinc-coordinating_DNA-binding_domains	C2H2_zinc_finger_factors	-
ZNF44	-	Monomer_or_homomultimer	High_specificity_DNA-binding_protein	migrant	Zinc-coordinating_DNA-binding_domains	C2H2_zinc_finger_factors	no_tissue-specific
ZNF440	-	Monomer_or_homomultimer	High_specificity_DNA-binding_protein	pioneer	Zinc-coordinating_DNA-binding_domains	C2H2_zinc_finger_factors	-
ZNF441	-	Monomer_or_homomultimer	High_specificity_DNA-binding_protein	pioneer	Zinc-coordinating_DNA-binding_domains	C2H2_zinc_finger_factors	-
ZNF442	-	Monomer_or_homomultimer	High_specificity_DNA-binding_protein	migrant	Zinc-coordinating_DNA-binding_domains	C2H2_zinc_finger_factors	-
ZNF443	-	Monomer_or_homomultimer	High_specificity_DNA-binding_protein	pioneer	Zinc-coordinating_DNA-binding_domains	C2H2_zinc_finger_factors	-
ZNF444	-	Monomer_or_homomultimer	High_specificity_DNA-binding_protein	pioneer	Zinc-coordinating_DNA-binding_domains	C2H2_zinc_finger_factors	no_tissue-specific
ZNF445	-	Monomer_or_homomultimer	High_specificity_DNA-binding_protein	migrant	Zinc-coordinating_DNA-binding_domains	C2H2_zinc_finger_factors	no_tissue-specific
ZNF446	-	Monomer_or_homomultimer	High_specificity_DNA-binding_protein	migrant	Zinc-coordinating_DNA-binding_domains	C2H2_zinc_finger_factors	-
ZNF449	-	Monomer_or_homomultimer	High_specificity_DNA-binding_protein	pioneer	Zinc-coordinating_DNA-binding_domains	C2H2_zinc_finger_factors	-
ZNF45	-	Monomer_or_homomultimer	High_specificity_DNA-binding_protein	migrant	Zinc-coordinating_DNA-binding_domains	C2H2_zinc_finger_factors	-
ZNF451	activators	Monomer_or_homomultimer	High_specificity_DNA-binding_protein	pioneer	Zinc-coordinating_DNA-binding_domains	C2H2_zinc_finger_factors	-
ZNF454	-	Monomer_or_homomultimer	High_specificity_DNA-binding_protein	migrant	Zinc-coordinating_DNA-binding_domains	C2H2_zinc_finger_factors	tissue-specific
ZNF460	-	Monomer_or_homomultimer	High_specificity_DNA-binding_protein	pioneer	Zinc-coordinating_DNA-binding_domains	C2H2_zinc_finger_factors	tissue-specific
ZNF461	-	Monomer_or_homomultimer	High_specificity_DNA-binding_protein	migrant	Zinc-coordinating_DNA-binding_domains	C2H2_zinc_finger_factors	-
ZNF462	-	Monomer_or_homomultimer	High_specificity_DNA-binding_protein	settler	Zinc-coordinating_DNA-binding_domains	C2H2_zinc_finger_factors	-
ZNF467	-	Monomer_or_homomultimer	High_specificity_DNA-binding_protein	settler	Zinc-coordinating_DNA-binding_domains	C2H2_zinc_finger_factors	no_tissue-specific
ZNF468	-	Monomer_or_homomultimer	High_specificity_DNA-binding_protein	-	Zinc-coordinating_DNA-binding_domains	C2H2_zinc_finger_factors	-
ZNF469	-	Monomer_or_homomultimer	High_specificity_DNA-binding_protein	settler	Zinc-coordinating_DNA-binding_domains	C2H2_zinc_finger_factors	-
ZNF470	-	Monomer_or_homomultimer	High_specificity_DNA-binding_protein	-	Zinc-coordinating_DNA-binding_domains	C2H2_zinc_finger_factors	-
ZNF471	-	Monomer_or_homomultimer	High_specificity_DNA-binding_protein	pioneer	Zinc-coordinating_DNA-binding_domains	C2H2_zinc_finger_factors	-
ZNF479	-	Monomer_or_homomultimer	High_specificity_DNA-binding_protein	pioneer	Zinc-coordinating_DNA-binding_domains	C2H2_zinc_finger_factors	tissue-specific
ZNF48	-	Monomer_or_homomultimer	High_specificity_DNA-binding_protein	settler	Zinc-coordinating_DNA-binding_domains	C2H2_zinc_finger_factors	no_tissue-specific
ZNF480	-	Monomer_or_homomultimer	High_specificity_DNA-binding_protein	pioneer	Zinc-coordinating_DNA-binding_domains	C2H2_zinc_finger_factors	no_tissue-specific
ZNF483	-	Monomer_or_homomultimer	High_specificity_DNA-binding_protein	pioneer	Zinc-coordinating_DNA-binding_domains	C2H2_zinc_finger_factors	-
ZNF484	-	Monomer_or_homomultimer	High_specificity_DNA-binding_protein	-	Zinc-coordinating_DNA-binding_domains	C2H2_zinc_finger_factors	-
ZNF485	-	Monomer_or_homomultimer	High_specificity_DNA-binding_protein	-	Zinc-coordinating_DNA-binding_domains	C2H2_zinc_finger_factors	-
ZNF487	-	Monomer_or_homomultimer	High_specificity_DNA-binding_protein	-	Zinc-coordinating_DNA-binding_domains	C2H2_zinc_finger_factors	-
ZNF490	-	Monomer_or_homomultimer	High_specificity_DNA-binding_protein	pioneer	Zinc-coordinating_DNA-binding_domains	C2H2_zinc_finger_factors	-
ZNF491	-	Monomer_or_homomultimer	High_specificity_DNA-binding_protein	settler	Zinc-coordinating_DNA-binding_domains	C2H2_zinc_finger_factors	-
ZNF492	-	Monomer_or_homomultimer	High_specificity_DNA-binding_protein	-	Zinc-coordinating_DNA-binding_domains	C2H2_zinc_finger_factors	-
ZNF493	-	Monomer_or_homomultimer	High_specificity_DNA-binding_protein	migrant	Zinc-coordinating_DNA-binding_domains	C2H2_zinc_finger_factors	-
ZNF496	-	Monomer_or_homomultimer	High_specificity_DNA-binding_protein	pioneer	Zinc-coordinating_DNA-binding_domains	C2H2_zinc_finger_factors	no_tissue-specific
ZNF497	-	Monomer_or_homomultimer	High_specificity_DNA-binding_protein	-	Zinc-coordinating_DNA-binding_domains	C2H2_zinc_finger_factors	tissue-specific
ZNF500	-	Monomer_or_homomultimer	High_specificity_DNA-binding_protein	pioneer	Zinc-coordinating_DNA-binding_domains	C2H2_zinc_finger_factors	-
ZNF501	-	Monomer_or_homomultimer	High_specificity_DNA-binding_protein	migrant	Zinc-coordinating_DNA-binding_domains	C2H2_zinc_finger_factors	-
ZNF502	-	Monomer_or_homomultimer	High_specificity_DNA-binding_protein	migrant	Zinc-coordinating_DNA-binding_domains	C2H2_zinc_finger_factors	-
ZNF506	-	Monomer_or_homomultimer	High_specificity_DNA-binding_protein	-	Zinc-coordinating_DNA-binding_domains	C2H2_zinc_finger_factors	-
ZNF507	-	Monomer_or_homomultimer	High_specificity_DNA-binding_protein	pioneer	Zinc-coordinating_DNA-binding_domains	C2H2_zinc_finger_factors	no_tissue-specific
ZNF510	-	Monomer_or_homomultimer	High_specificity_DNA-binding_protein	settler	Zinc-coordinating_DNA-binding_domains	C2H2_zinc_finger_factors	-
ZNF511	-	Monomer_or_homomultimer	High_specificity_DNA-binding_protein	-	Zinc-coordinating_DNA-binding_domains	C2H2_zinc_finger_factors	no_tissue-specific
ZNF512	-	Monomer_or_homomultimer	High_specificity_DNA-binding_protein	settler	Zinc-coordinating_DNA-binding_domains	C2H2_zinc_finger_factors	no_tissue-specific
ZNF512B	-	Monomer_or_homomultimer	High_specificity_DNA-binding_protein	settler	Zinc-coordinating_DNA-binding_domains	C2H2_zinc_finger_factors	no_tissue-specific
ZNF513	-	Monomer_or_homomultimer	High_specificity_DNA-binding_protein	pioneer	Zinc-coordinating_DNA-binding_domains	C2H2_zinc_finger_factors	no_tissue-specific
ZNF514	-	Monomer_or_homomultimer	High_specificity_DNA-binding_protein	pioneer	Zinc-coordinating_DNA-binding_domains	C2H2_zinc_finger_factors	no_tissue-specific
ZNF516	activators	Monomer_or_homomultimer	High_specificity_DNA-binding_protein	-	Zinc-coordinating_DNA-binding_domains	C2H2_zinc_finger_factors	no_tissue-specific
ZNF517	-	Monomer_or_homomultimer	High_specificity_DNA-binding_protein	-	Zinc-coordinating_DNA-binding_domains	C2H2_zinc_finger_factors	-
ZNF518A	-	Monomer_or_homomultimer	High_specificity_DNA-binding_protein	-	Zinc-coordinating_DNA-binding_domains	C2H2_zinc_finger_factors	no_tissue-specific
ZNF518B	-	Monomer_or_homomultimer	High_specificity_DNA-binding_protein	-	Zinc-coordinating_DNA-binding_domains	C2H2_zinc_finger_factors	-
ZNF519	-	Monomer_or_homomultimer	High_specificity_DNA-binding_protein	pioneer	Zinc-coordinating_DNA-binding_domains	C2H2_zinc_finger_factors	-
ZNF521	dual	Monomer_or_homomultimer	High_specificity_DNA-binding_protein	-	Zinc-coordinating_DNA-binding_domains	C2H2_zinc_finger_factors	-
ZNF524	-	Monomer_or_homomultimer	High_specificity_DNA-binding_protein	pioneer	Zinc-coordinating_DNA-binding_domains	C2H2_zinc_finger_factors	no_tissue-specific
ZNF525	-	Monomer_or_homomultimer	High_specificity_DNA-binding_protein	-	Zinc-coordinating_DNA-binding_domains	C2H2_zinc_finger_factors	-
ZNF526	-	Monomer_or_homomultimer	High_specificity_DNA-binding_protein	-	Zinc-coordinating_DNA-binding_domains	C2H2_zinc_finger_factors	-
ZNF527	-	Monomer_or_homomultimer	High_specificity_DNA-binding_protein	-	Zinc-coordinating_DNA-binding_domains	C2H2_zinc_finger_factors	-
ZNF528	-	Monomer_or_homomultimer	High_specificity_DNA-binding_protein	-	Zinc-coordinating_DNA-binding_domains	C2H2_zinc_finger_factors	-
ZNF529	-	Monomer_or_homomultimer	High_specificity_DNA-binding_protein	-	Zinc-coordinating_DNA-binding_domains	C2H2_zinc_finger_factors	-
ZNF530	-	Monomer_or_homomultimer	High_specificity_DNA-binding_protein	-	Zinc-coordinating_DNA-binding_domains	C2H2_zinc_finger_factors	tissue-specific
ZNF532	-	Monomer_or_homomultimer	High_specificity_DNA-binding_protein	-	Zinc-coordinating_DNA-binding_domains	C2H2_zinc_finger_factors	-
ZNF534	-	Monomer_or_homomultimer	High_specificity_DNA-binding_protein	-	Zinc-coordinating_DNA-binding_domains	C2H2_zinc_finger_factors	-
ZNF536	-	Monomer_or_homomultimer	High_specificity_DNA-binding_protein	-	Zinc-coordinating_DNA-binding_domains	C2H2_zinc_finger_factors	-
ZNF540	repressors	Monomer_or_homomultimer	High_specificity_DNA-binding_protein	pioneer	Zinc-coordinating_DNA-binding_domains	C2H2_zinc_finger_factors	-
ZNF541	-	Monomer_or_homomultimer	High_specificity_DNA-binding_protein	-	Helix-turn-helix_domains	Tryptophan_cluster_factors	tissue-specific
ZNF542P	-	-	Not_a_DNA_binding_protein	-	Zinc-coordinating_DNA-binding_domains	C2H2_zinc_finger_factors	-
ZNF543	-	Monomer_or_homomultimer	High_specificity_DNA-binding_protein	-	Zinc-coordinating_DNA-binding_domains	C2H2_zinc_finger_factors	-
ZNF544	-	Monomer_or_homomultimer	High_specificity_DNA-binding_protein	pioneer	Zinc-coordinating_DNA-binding_domains	C2H2_zinc_finger_factors	-
ZNF546	-	Monomer_or_homomultimer	High_specificity_DNA-binding_protein	pioneer	Zinc-coordinating_DNA-binding_domains	C2H2_zinc_finger_factors	-
ZNF547	-	Monomer_or_homomultimer	High_specificity_DNA-binding_protein	migrant	Zinc-coordinating_DNA-binding_domains	C2H2_zinc_finger_factors	-
ZNF548	-	Monomer_or_homomultimer	High_specificity_DNA-binding_protein	-	Zinc-coordinating_DNA-binding_domains	C2H2_zinc_finger_factors	no_tissue-specific
ZNF549	-	Monomer_or_homomultimer	High_specificity_DNA-binding_protein	pioneer	Zinc-coordinating_DNA-binding_domains	C2H2_zinc_finger_factors	-
ZNF550	-	Monomer_or_homomultimer	High_specificity_DNA-binding_protein	pioneer	Zinc-coordinating_DNA-binding_domains	C2H2_zinc_finger_factors	-
ZNF551	-	Monomer_or_homomultimer	High_specificity_DNA-binding_protein	pioneer	Zinc-coordinating_DNA-binding_domains	C2H2_zinc_finger_factors	-
ZNF552	-	Monomer_or_homomultimer	High_specificity_DNA-binding_protein	-	Zinc-coordinating_DNA-binding_domains	C2H2_zinc_finger_factors	-
ZNF554	-	Monomer_or_homomultimer	High_specificity_DNA-binding_protein	migrant	Zinc-coordinating_DNA-binding_domains	C2H2_zinc_finger_factors	-
ZNF555	-	Monomer_or_homomultimer	High_specificity_DNA-binding_protein	pioneer	Zinc-coordinating_DNA-binding_domains	C2H2_zinc_finger_factors	tissue-specific
ZNF556	-	Monomer_or_homomultimer	High_specificity_DNA-binding_protein	pioneer	Zinc-coordinating_DNA-binding_domains	C2H2_zinc_finger_factors	-
ZNF557	-	Monomer_or_homomultimer	High_specificity_DNA-binding_protein	migrant	Zinc-coordinating_DNA-binding_domains	C2H2_zinc_finger_factors	-
ZNF558	-	Monomer_or_homomultimer	High_specificity_DNA-binding_protein	pioneer	Zinc-coordinating_DNA-binding_domains	C2H2_zinc_finger_factors	no_tissue-specific
ZNF559	-	Monomer_or_homomultimer	High_specificity_DNA-binding_protein	migrant	Zinc-coordinating_DNA-binding_domains	C2H2_zinc_finger_factors	-
ZNF56	-	-	-	-	Zinc-coordinating_DNA-binding_domains	C2H2_zinc_finger_factors	-
ZNF560	-	Monomer_or_homomultimer	High_specificity_DNA-binding_protein	pioneer	Zinc-coordinating_DNA-binding_domains	C2H2_zinc_finger_factors	tissue-specific
ZNF561	-	Monomer_or_homomultimer	High_specificity_DNA-binding_protein	-	Zinc-coordinating_DNA-binding_domains	C2H2_zinc_finger_factors	no_tissue-specific
ZNF562	-	Monomer_or_homomultimer	High_specificity_DNA-binding_protein	-	Zinc-coordinating_DNA-binding_domains	C2H2_zinc_finger_factors	-
ZNF563	-	Monomer_or_homomultimer	High_specificity_DNA-binding_protein	pioneer	Zinc-coordinating_DNA-binding_domains	C2H2_zinc_finger_factors	-
ZNF564	-	Monomer_or_homomultimer	High_specificity_DNA-binding_protein	pioneer	Zinc-coordinating_DNA-binding_domains	C2H2_zinc_finger_factors	-
ZNF565	-	Monomer_or_homomultimer	High_specificity_DNA-binding_protein	pioneer	Zinc-coordinating_DNA-binding_domains	C2H2_zinc_finger_factors	-
ZNF566	-	Monomer_or_homomultimer	High_specificity_DNA-binding_protein	pioneer	Zinc-coordinating_DNA-binding_domains	C2H2_zinc_finger_factors	-
ZNF567	-	Monomer_or_homomultimer	High_specificity_DNA-binding_protein	migrant	Zinc-coordinating_DNA-binding_domains	C2H2_zinc_finger_factors	-
ZNF568	repressors	Monomer_or_homomultimer	High_specificity_DNA-binding_protein	migrant	Zinc-coordinating_DNA-binding_domains	C2H2_zinc_finger_factors	-
ZNF569	-	Monomer_or_homomultimer	High_specificity_DNA-binding_protein	-	Zinc-coordinating_DNA-binding_domains	C2H2_zinc_finger_factors	-
ZNF57	-	Monomer_or_homomultimer	High_specificity_DNA-binding_protein	-	Zinc-coordinating_DNA-binding_domains	C2H2_zinc_finger_factors	-
ZNF570	-	Monomer_or_homomultimer	High_specificity_DNA-binding_protein	pioneer	Zinc-coordinating_DNA-binding_domains	C2H2_zinc_finger_factors	-
ZNF571	-	Monomer_or_homomultimer	High_specificity_DNA-binding_protein	pioneer	Zinc-coordinating_DNA-binding_domains	C2H2_zinc_finger_factors	-
ZNF572	-	Monomer_or_homomultimer	High_specificity_DNA-binding_protein	-	Zinc-coordinating_DNA-binding_domains	C2H2_zinc_finger_factors	tissue-specific
ZNF573	-	Monomer_or_homomultimer	High_specificity_DNA-binding_protein	migrant	Zinc-coordinating_DNA-binding_domains	C2H2_zinc_finger_factors	tissue-specific
ZNF574	-	Monomer_or_homomultimer	High_specificity_DNA-binding_protein	-	Zinc-coordinating_DNA-binding_domains	C2H2_zinc_finger_factors	no_tissue-specific
ZNF575	-	Monomer_or_homomultimer	High_specificity_DNA-binding_protein	-	Zinc-coordinating_DNA-binding_domains	C2H2_zinc_finger_factors	-
ZNF576	-	Monomer_or_homomultimer	High_specificity_DNA-binding_protein	-	Zinc-coordinating_DNA-binding_domains	C2H2_zinc_finger_factors	no_tissue-specific
ZNF577	-	Monomer_or_homomultimer	High_specificity_DNA-binding_protein	migrant	Zinc-coordinating_DNA-binding_domains	C2H2_zinc_finger_factors	-
ZNF578	-	Monomer_or_homomultimer	High_specificity_DNA-binding_protein	pioneer	Zinc-coordinating_DNA-binding_domains	C2H2_zinc_finger_factors	-
ZNF579	-	Monomer_or_homomultimer	High_specificity_DNA-binding_protein	-	Zinc-coordinating_DNA-binding_domains	C2H2_zinc_finger_factors	no_tissue-specific
ZNF580	-	Monomer_or_homomultimer	High_specificity_DNA-binding_protein	migrant	Zinc-coordinating_DNA-binding_domains	C2H2_zinc_finger_factors	no_tissue-specific
ZNF581	-	Monomer_or_homomultimer	High_specificity_DNA-binding_protein	migrant	Zinc-coordinating_DNA-binding_domains	C2H2_zinc_finger_factors	no_tissue-specific
ZNF582	-	Monomer_or_homomultimer	High_specificity_DNA-binding_protein	pioneer	Zinc-coordinating_DNA-binding_domains	C2H2_zinc_finger_factors	-
ZNF583	-	Monomer_or_homomultimer	High_specificity_DNA-binding_protein	pioneer	Zinc-coordinating_DNA-binding_domains	C2H2_zinc_finger_factors	tissue-specific
ZNF584	-	Monomer_or_homomultimer	High_specificity_DNA-binding_protein	migrant	Zinc-coordinating_DNA-binding_domains	C2H2_zinc_finger_factors	no_tissue-specific
ZNF585A	-	Monomer_or_homomultimer	High_specificity_DNA-binding_protein	migrant	Zinc-coordinating_DNA-binding_domains	C2H2_zinc_finger_factors	-
ZNF585B	-	Monomer_or_homomultimer	High_specificity_DNA-binding_protein	migrant	Zinc-coordinating_DNA-binding_domains	C2H2_zinc_finger_factors	-
ZNF586	-	Monomer_or_homomultimer	High_specificity_DNA-binding_protein	pioneer	Zinc-coordinating_DNA-binding_domains	C2H2_zinc_finger_factors	-
ZNF587	-	Monomer_or_homomultimer	High_specificity_DNA-binding_protein	settler	Zinc-coordinating_DNA-binding_domains	C2H2_zinc_finger_factors	no_tissue-specific
ZNF589	-	Monomer_or_homomultimer	High_specificity_DNA-binding_protein	pioneer	Zinc-coordinating_DNA-binding_domains	C2H2_zinc_finger_factors	no_tissue-specific
ZNF592	-	Monomer_or_homomultimer	High_specificity_DNA-binding_protein	settler	Zinc-coordinating_DNA-binding_domains	C2H2_zinc_finger_factors	no_tissue-specific
ZNF594	-	Monomer_or_homomultimer	High_specificity_DNA-binding_protein	-	Zinc-coordinating_DNA-binding_domains	C2H2_zinc_finger_factors	-
ZNF595	-	Monomer_or_homomultimer	High_specificity_DNA-binding_protein	pioneer	Zinc-coordinating_DNA-binding_domains	C2H2_zinc_finger_factors	-
ZNF596	-	Monomer_or_homomultimer	High_specificity_DNA-binding_protein	pioneer	Zinc-coordinating_DNA-binding_domains	C2H2_zinc_finger_factors	-
ZNF597	-	Monomer_or_homomultimer	High_specificity_DNA-binding_protein	settler	Zinc-coordinating_DNA-binding_domains	C2H2_zinc_finger_factors	-
ZNF599	-	Monomer_or_homomultimer	High_specificity_DNA-binding_protein	pioneer	Zinc-coordinating_DNA-binding_domains	C2H2_zinc_finger_factors	-
ZNF600	-	Monomer_or_homomultimer	High_specificity_DNA-binding_protein	-	Zinc-coordinating_DNA-binding_domains	C2H2_zinc_finger_factors	-
ZNF605	-	Monomer_or_homomultimer	High_specificity_DNA-binding_protein	-	Zinc-coordinating_DNA-binding_domains	C2H2_zinc_finger_factors	-
ZNF606	repressors	Monomer_or_homomultimer	High_specificity_DNA-binding_protein	settler	Zinc-coordinating_DNA-binding_domains	C2H2_zinc_finger_factors	-
ZNF607	-	Monomer_or_homomultimer	High_specificity_DNA-binding_protein	-	Zinc-coordinating_DNA-binding_domains	C2H2_zinc_finger_factors	-
ZNF610	-	Monomer_or_homomultimer	High_specificity_DNA-binding_protein	migrant	Zinc-coordinating_DNA-binding_domains	C2H2_zinc_finger_factors	-
ZNF611	-	Monomer_or_homomultimer	High_specificity_DNA-binding_protein	pioneer	Zinc-coordinating_DNA-binding_domains	C2H2_zinc_finger_factors	-
ZNF613	-	Monomer_or_homomultimer	High_specificity_DNA-binding_protein	pioneer	Zinc-coordinating_DNA-binding_domains	C2H2_zinc_finger_factors	-
ZNF614	-	Monomer_or_homomultimer	High_specificity_DNA-binding_protein	-	Zinc-coordinating_DNA-binding_domains	C2H2_zinc_finger_factors	-
ZNF615	-	Monomer_or_homomultimer	High_specificity_DNA-binding_protein	pioneer	Zinc-coordinating_DNA-binding_domains	C2H2_zinc_finger_factors	-
ZNF616	-	Monomer_or_homomultimer	High_specificity_DNA-binding_protein	-	Zinc-coordinating_DNA-binding_domains	C2H2_zinc_finger_factors	-
ZNF618	-	Monomer_or_homomultimer	High_specificity_DNA-binding_protein	-	Zinc-coordinating_DNA-binding_domains	C2H2_zinc_finger_factors	-
ZNF619	-	Monomer_or_homomultimer	High_specificity_DNA-binding_protein	-	Zinc-coordinating_DNA-binding_domains	C2H2_zinc_finger_factors	-
ZNF620	-	Monomer_or_homomultimer	High_specificity_DNA-binding_protein	-	Zinc-coordinating_DNA-binding_domains	C2H2_zinc_finger_factors	tissue-specific
ZNF621	-	Monomer_or_homomultimer	High_specificity_DNA-binding_protein	-	Zinc-coordinating_DNA-binding_domains	C2H2_zinc_finger_factors	no_tissue-specific
ZNF623	-	Monomer_or_homomultimer	High_specificity_DNA-binding_protein	migrant	Zinc-coordinating_DNA-binding_domains	C2H2_zinc_finger_factors	no_tissue-specific
ZNF624	-	Monomer_or_homomultimer	High_specificity_DNA-binding_protein	pioneer	Zinc-coordinating_DNA-binding_domains	C2H2_zinc_finger_factors	tissue-specific
ZNF625	-	Monomer_or_homomultimer	High_specificity_DNA-binding_protein	-	Zinc-coordinating_DNA-binding_domains	C2H2_zinc_finger_factors	-
ZNF626	-	Monomer_or_homomultimer	High_specificity_DNA-binding_protein	pioneer	Zinc-coordinating_DNA-binding_domains	C2H2_zinc_finger_factors	-
ZNF627	-	Monomer_or_homomultimer	High_specificity_DNA-binding_protein	pioneer	Zinc-coordinating_DNA-binding_domains	C2H2_zinc_finger_factors	-
ZNF628	activators	Monomer_or_homomultimer	High_specificity_DNA-binding_protein	-	Zinc-coordinating_DNA-binding_domains	C2H2_zinc_finger_factors	no_tissue-specific
ZNF629	-	Monomer_or_homomultimer	High_specificity_DNA-binding_protein	-	Zinc-coordinating_DNA-binding_domains	C2H2_zinc_finger_factors	no_tissue-specific
ZNF639	repressors	Monomer_or_homomultimer	High_specificity_DNA-binding_protein	pioneer	Zinc-coordinating_DNA-binding_domains	C2H2_zinc_finger_factors	no_tissue-specific
ZNF641	activators	Monomer_or_homomultimer	High_specificity_DNA-binding_protein	pioneer	Zinc-coordinating_DNA-binding_domains	C2H2_zinc_finger_factors	no_tissue-specific
ZNF644	-	Monomer_or_homomultimer	High_specificity_DNA-binding_protein	settler	Zinc-coordinating_DNA-binding_domains	C2H2_zinc_finger_factors	no_tissue-specific
ZNF646	-	Monomer_or_homomultimer	High_specificity_DNA-binding_protein	settler	Zinc-coordinating_DNA-binding_domains	C2H2_zinc_finger_factors	no_tissue-specific
ZNF648	-	Monomer_or_homomultimer	High_specificity_DNA-binding_protein	-	Zinc-coordinating_DNA-binding_domains	C2H2_zinc_finger_factors	-
ZNF649	repressors	Monomer_or_homomultimer	High_specificity_DNA-binding_protein	pioneer	Zinc-coordinating_DNA-binding_domains	C2H2_zinc_finger_factors	-
ZNF652	-	Monomer_or_homomultimer	High_specificity_DNA-binding_protein	-	Zinc-coordinating_DNA-binding_domains	C2H2_zinc_finger_factors	no_tissue-specific
ZNF653	repressors	Monomer_or_homomultimer	High_specificity_DNA-binding_protein	pioneer	Zinc-coordinating_DNA-binding_domains	C2H2_zinc_finger_factors	-
ZNF654	-	Monomer_or_homomultimer	High_specificity_DNA-binding_protein	-	Zinc-coordinating_DNA-binding_domains	C2H2_zinc_finger_factors	no_tissue-specific
ZNF655	-	Monomer_or_homomultimer	High_specificity_DNA-binding_protein	migrant	Zinc-coordinating_DNA-binding_domains	C2H2_zinc_finger_factors	no_tissue-specific
ZNF658	repressors	Monomer_or_homomultimer	High_specificity_DNA-binding_protein	-	Zinc-coordinating_DNA-binding_domains	C2H2_zinc_finger_factors	-
ZNF658B	-	-	-	-	Zinc-coordinating_DNA-binding_domains	C2H2_zinc_finger_factors	-
ZNF66	-	Monomer_or_homomultimer	High_specificity_DNA-binding_protein	-	Zinc-coordinating_DNA-binding_domains	C2H2_zinc_finger_factors	-
ZNF660	-	Monomer_or_homomultimer	High_specificity_DNA-binding_protein	-	Zinc-coordinating_DNA-binding_domains	C2H2_zinc_finger_factors	-
ZNF662	-	Monomer_or_homomultimer	High_specificity_DNA-binding_protein	-	Zinc-coordinating_DNA-binding_domains	C2H2_zinc_finger_factors	-
ZNF664	-	Monomer_or_homomultimer	High_specificity_DNA-binding_protein	-	Zinc-coordinating_DNA-binding_domains	C2H2_zinc_finger_factors	no_tissue-specific
ZNF665	-	Monomer_or_homomultimer	High_specificity_DNA-binding_protein	-	Zinc-coordinating_DNA-binding_domains	C2H2_zinc_finger_factors	tissue-specific
ZNF667	-	Monomer_or_homomultimer	High_specificity_DNA-binding_protein	-	Zinc-coordinating_DNA-binding_domains	C2H2_zinc_finger_factors	-
ZNF668	-	Monomer_or_homomultimer	High_specificity_DNA-binding_protein	-	Zinc-coordinating_DNA-binding_domains	C2H2_zinc_finger_factors	tissue-specific
ZNF669	-	Monomer_or_homomultimer	High_specificity_DNA-binding_protein	migrant	Zinc-coordinating_DNA-binding_domains	C2H2_zinc_finger_factors	-
ZNF670	-	Monomer_or_homomultimer	High_specificity_DNA-binding_protein	migrant	Zinc-coordinating_DNA-binding_domains	C2H2_zinc_finger_factors	-
ZNF671	-	Monomer_or_homomultimer	High_specificity_DNA-binding_protein	settler	Zinc-coordinating_DNA-binding_domains	C2H2_zinc_finger_factors	-
ZNF672	-	Monomer_or_homomultimer	High_specificity_DNA-binding_protein	-	Zinc-coordinating_DNA-binding_domains	C2H2_zinc_finger_factors	no_tissue-specific
ZNF674	-	Monomer_or_homomultimer	High_specificity_DNA-binding_protein	-	Zinc-coordinating_DNA-binding_domains	C2H2_zinc_finger_factors	-
ZNF675	-	Monomer_or_homomultimer	High_specificity_DNA-binding_protein	pioneer	Zinc-coordinating_DNA-binding_domains	C2H2_zinc_finger_factors	-
ZNF676	-	Monomer_or_homomultimer	High_specificity_DNA-binding_protein	-	Zinc-coordinating_DNA-binding_domains	C2H2_zinc_finger_factors	-
ZNF677	-	Monomer_or_homomultimer	High_specificity_DNA-binding_protein	pioneer	Zinc-coordinating_DNA-binding_domains	C2H2_zinc_finger_factors	-
ZNF678	-	Monomer_or_homomultimer	High_specificity_DNA-binding_protein	-	Zinc-coordinating_DNA-binding_domains	C2H2_zinc_finger_factors	-
ZNF679	-	Monomer_or_homomultimer	High_specificity_DNA-binding_protein	pioneer	Zinc-coordinating_DNA-binding_domains	C2H2_zinc_finger_factors	-
ZNF680	-	Monomer_or_homomultimer	High_specificity_DNA-binding_protein	-	Zinc-coordinating_DNA-binding_domains	C2H2_zinc_finger_factors	-
ZNF681	-	Monomer_or_homomultimer	High_specificity_DNA-binding_protein	-	Zinc-coordinating_DNA-binding_domains	C2H2_zinc_finger_factors	tissue-specific
ZNF682	-	Monomer_or_homomultimer	High_specificity_DNA-binding_protein	-	Zinc-coordinating_DNA-binding_domains	C2H2_zinc_finger_factors	-
ZNF683	repressors	Monomer_or_homomultimer	High_specificity_DNA-binding_protein	-	Zinc-coordinating_DNA-binding_domains	C2H2_zinc_finger_factors	tissue-specific
ZNF684	-	Monomer_or_homomultimer	High_specificity_DNA-binding_protein	-	Zinc-coordinating_DNA-binding_domains	C2H2_zinc_finger_factors	-
ZNF687	-	Monomer_or_homomultimer	High_specificity_DNA-binding_protein	-	Zinc-coordinating_DNA-binding_domains	C2H2_zinc_finger_factors	no_tissue-specific
ZNF689	-	Monomer_or_homomultimer	High_specificity_DNA-binding_protein	migrant	Zinc-coordinating_DNA-binding_domains	C2H2_zinc_finger_factors	no_tissue-specific
ZNF69	-	Monomer_or_homomultimer	High_specificity_DNA-binding_protein	-	Zinc-coordinating_DNA-binding_domains	C2H2_zinc_finger_factors	-
ZNF691	-	Monomer_or_homomultimer	High_specificity_DNA-binding_protein	-	Zinc-coordinating_DNA-binding_domains	C2H2_zinc_finger_factors	no_tissue-specific
ZNF692	-	Monomer_or_homomultimer	High_specificity_DNA-binding_protein	-	Zinc-coordinating_DNA-binding_domains	C2H2_zinc_finger_factors	no_tissue-specific
ZNF695	-	Monomer_or_homomultimer	High_specificity_DNA-binding_protein	pioneer	Zinc-coordinating_DNA-binding_domains	C2H2_zinc_finger_factors	-
ZNF696	-	Monomer_or_homomultimer	High_specificity_DNA-binding_protein	-	Zinc-coordinating_DNA-binding_domains	C2H2_zinc_finger_factors	-
ZNF697	-	Monomer_or_homomultimer	High_specificity_DNA-binding_protein	-	Zinc-coordinating_DNA-binding_domains	C2H2_zinc_finger_factors	-
ZNF699	-	Monomer_or_homomultimer	High_specificity_DNA-binding_protein	-	Zinc-coordinating_DNA-binding_domains	C2H2_zinc_finger_factors	-
ZNF7	-	Monomer_or_homomultimer	High_specificity_DNA-binding_protein	migrant	Zinc-coordinating_DNA-binding_domains	C2H2_zinc_finger_factors	no_tissue-specific
ZNF70	-	Monomer_or_homomultimer	High_specificity_DNA-binding_protein	migrant	Zinc-coordinating_DNA-binding_domains	C2H2_zinc_finger_factors	-
ZNF700	-	Monomer_or_homomultimer	High_specificity_DNA-binding_protein	pioneer	Zinc-coordinating_DNA-binding_domains	C2H2_zinc_finger_factors	no_tissue-specific
ZNF701	-	Monomer_or_homomultimer	High_specificity_DNA-binding_protein	-	Zinc-coordinating_DNA-binding_domains	C2H2_zinc_finger_factors	-
ZNF702P	-	-	-	-	Zinc-coordinating_DNA-binding_domains	C2H2_zinc_finger_factors	-
ZNF705A	-	Monomer_or_homomultimer	High_specificity_DNA-binding_protein	-	Zinc-coordinating_DNA-binding_domains	C2H2_zinc_finger_factors	-
ZNF705D	-	Monomer_or_homomultimer	High_specificity_DNA-binding_protein	-	Zinc-coordinating_DNA-binding_domains	C2H2_zinc_finger_factors	-
ZNF705E	-	Monomer_or_homomultimer	High_specificity_DNA-binding_protein	-	Zinc-coordinating_DNA-binding_domains	C2H2_zinc_finger_factors	-
ZNF705F	-	-	-	-	Zinc-coordinating_DNA-binding_domains	C2H2_zinc_finger_factors	-
ZNF705G	-	Monomer_or_homomultimer	High_specificity_DNA-binding_protein	-	Zinc-coordinating_DNA-binding_domains	C2H2_zinc_finger_factors	-
ZNF707	-	Monomer_or_homomultimer	High_specificity_DNA-binding_protein	migrant	Zinc-coordinating_DNA-binding_domains	C2H2_zinc_finger_factors	-
ZNF708	-	Monomer_or_homomultimer	High_specificity_DNA-binding_protein	pioneer	Zinc-coordinating_DNA-binding_domains	C2H2_zinc_finger_factors	-
ZNF709	-	Monomer_or_homomultimer	High_specificity_DNA-binding_protein	pioneer	Zinc-coordinating_DNA-binding_domains	C2H2_zinc_finger_factors	-
ZNF71	-	Monomer_or_homomultimer	High_specificity_DNA-binding_protein	pioneer	Zinc-coordinating_DNA-binding_domains	C2H2_zinc_finger_factors	-
ZNF710	-	Monomer_or_homomultimer	High_specificity_DNA-binding_protein	-	Zinc-coordinating_DNA-binding_domains	C2H2_zinc_finger_factors	no_tissue-specific
ZNF711	activators	Monomer_or_homomultimer	High_specificity_DNA-binding_protein	pioneer	Zinc-coordinating_DNA-binding_domains	C2H2_zinc_finger_factors	-
ZNF713	-	Monomer_or_homomultimer	High_specificity_DNA-binding_protein	pioneer	Zinc-coordinating_DNA-binding_domains	C2H2_zinc_finger_factors	tissue-specific
ZNF714	-	Monomer_or_homomultimer	High_specificity_DNA-binding_protein	pioneer	Zinc-coordinating_DNA-binding_domains	C2H2_zinc_finger_factors	-
ZNF716	-	Monomer_or_homomultimer	High_specificity_DNA-binding_protein	-	Zinc-coordinating_DNA-binding_domains	C2H2_zinc_finger_factors	-
ZNF717	-	Monomer_or_homomultimer	High_specificity_DNA-binding_protein	-	Zinc-coordinating_DNA-binding_domains	C2H2_zinc_finger_factors	-
ZNF718	-	Monomer_or_homomultimer	High_specificity_DNA-binding_protein	-	Zinc-coordinating_DNA-binding_domains	C2H2_zinc_finger_factors	-
ZNF721	-	Monomer_or_homomultimer	High_specificity_DNA-binding_protein	-	Zinc-coordinating_DNA-binding_domains	C2H2_zinc_finger_factors	no_tissue-specific
ZNF724	-	Monomer_or_homomultimer	High_specificity_DNA-binding_protein	-	-	-	-
ZNF726	-	Monomer_or_homomultimer	High_specificity_DNA-binding_protein	-	Zinc-coordinating_DNA-binding_domains	C2H2_zinc_finger_factors	-
ZNF727	-	Monomer_or_homomultimer	High_specificity_DNA-binding_protein	-	Zinc-coordinating_DNA-binding_domains	C2H2_zinc_finger_factors	tissue-specific
ZNF729	-	Monomer_or_homomultimer	High_specificity_DNA-binding_protein	-	Zinc-coordinating_DNA-binding_domains	C2H2_zinc_finger_factors	-
ZNF73	-	-	Not_a_DNA_binding_protein	-	Zinc-coordinating_DNA-binding_domains	C2H2_zinc_finger_factors	-
ZNF730	-	Monomer_or_homomultimer	High_specificity_DNA-binding_protein	-	Zinc-coordinating_DNA-binding_domains	C2H2_zinc_finger_factors	tissue-specific
ZNF732	-	Monomer_or_homomultimer	High_specificity_DNA-binding_protein	-	Zinc-coordinating_DNA-binding_domains	C2H2_zinc_finger_factors	tissue-specific
ZNF735	-	Monomer_or_homomultimer	High_specificity_DNA-binding_protein	-	Zinc-coordinating_DNA-binding_domains	C2H2_zinc_finger_factors	-
ZNF736	-	Monomer_or_homomultimer	High_specificity_DNA-binding_protein	-	Zinc-coordinating_DNA-binding_domains	C2H2_zinc_finger_factors	-
ZNF737	-	Monomer_or_homomultimer	High_specificity_DNA-binding_protein	-	Zinc-coordinating_DNA-binding_domains	C2H2_zinc_finger_factors	-
ZNF74	-	Monomer_or_homomultimer	High_specificity_DNA-binding_protein	pioneer	Zinc-coordinating_DNA-binding_domains	C2H2_zinc_finger_factors	-
ZNF740	-	Monomer_or_homomultimer	High_specificity_DNA-binding_protein	-	Zinc-coordinating_DNA-binding_domains	C2H2_zinc_finger_factors	no_tissue-specific
ZNF746	repressors	Monomer_or_homomultimer	High_specificity_DNA-binding_protein	-	Zinc-coordinating_DNA-binding_domains	C2H2_zinc_finger_factors	no_tissue-specific
ZNF749	-	Monomer_or_homomultimer	High_specificity_DNA-binding_protein	-	Zinc-coordinating_DNA-binding_domains	C2H2_zinc_finger_factors	tissue-specific
ZNF75A	-	Monomer_or_homomultimer	High_specificity_DNA-binding_protein	pioneer	Zinc-coordinating_DNA-binding_domains	C2H2_zinc_finger_factors	no_tissue-specific
ZNF75CP	-	-	-	-	Zinc-coordinating_DNA-binding_domains	C2H2_zinc_finger_factors	-
ZNF75D	-	Monomer_or_homomultimer	High_specificity_DNA-binding_protein	pioneer	Zinc-coordinating_DNA-binding_domains	C2H2_zinc_finger_factors	no_tissue-specific
ZNF76	-	Monomer_or_homomultimer	High_specificity_DNA-binding_protein	pioneer	Zinc-coordinating_DNA-binding_domains	C2H2_zinc_finger_factors	no_tissue-specific
ZNF761	-	Monomer_or_homomultimer	High_specificity_DNA-binding_protein	-	Zinc-coordinating_DNA-binding_domains	C2H2_zinc_finger_factors	no_tissue-specific
ZNF763	-	Monomer_or_homomultimer	High_specificity_DNA-binding_protein	-	Zinc-coordinating_DNA-binding_domains	C2H2_zinc_finger_factors	-
ZNF764	-	Monomer_or_homomultimer	High_specificity_DNA-binding_protein	pioneer	Zinc-coordinating_DNA-binding_domains	C2H2_zinc_finger_factors	no_tissue-specific
ZNF765	-	Monomer_or_homomultimer	High_specificity_DNA-binding_protein	pioneer	Zinc-coordinating_DNA-binding_domains	C2H2_zinc_finger_factors	-
ZNF766	-	Monomer_or_homomultimer	High_specificity_DNA-binding_protein	pioneer	Zinc-coordinating_DNA-binding_domains	C2H2_zinc_finger_factors	-
ZNF768	-	Monomer_or_homomultimer	High_specificity_DNA-binding_protein	migrant	Zinc-coordinating_DNA-binding_domains	C2H2_zinc_finger_factors	no_tissue-specific
ZNF77	-	Monomer_or_homomultimer	High_specificity_DNA-binding_protein	pioneer	Zinc-coordinating_DNA-binding_domains	C2H2_zinc_finger_factors	-
ZNF770	-	Monomer_or_homomultimer	High_specificity_DNA-binding_protein	-	Zinc-coordinating_DNA-binding_domains	C2H2_zinc_finger_factors	no_tissue-specific
ZNF771	-	Monomer_or_homomultimer	High_specificity_DNA-binding_protein	-	Zinc-coordinating_DNA-binding_domains	C2H2_zinc_finger_factors	-
ZNF772	-	Monomer_or_homomultimer	High_specificity_DNA-binding_protein	-	Zinc-coordinating_DNA-binding_domains	C2H2_zinc_finger_factors	-
ZNF773	-	Monomer_or_homomultimer	High_specificity_DNA-binding_protein	-	Zinc-coordinating_DNA-binding_domains	C2H2_zinc_finger_factors	-
ZNF774	-	Monomer_or_homomultimer	High_specificity_DNA-binding_protein	-	Zinc-coordinating_DNA-binding_domains	C2H2_zinc_finger_factors	tissue-specific
ZNF775	-	Monomer_or_homomultimer	High_specificity_DNA-binding_protein	-	Zinc-coordinating_DNA-binding_domains	C2H2_zinc_finger_factors	-
ZNF776	-	Monomer_or_homomultimer	High_specificity_DNA-binding_protein	-	Zinc-coordinating_DNA-binding_domains	C2H2_zinc_finger_factors	no_tissue-specific
ZNF777	-	Monomer_or_homomultimer	High_specificity_DNA-binding_protein	-	Zinc-coordinating_DNA-binding_domains	C2H2_zinc_finger_factors	no_tissue-specific
ZNF778	-	Monomer_or_homomultimer	High_specificity_DNA-binding_protein	settler	Zinc-coordinating_DNA-binding_domains	C2H2_zinc_finger_factors	-
ZNF780A	-	Monomer_or_homomultimer	High_specificity_DNA-binding_protein	-	Zinc-coordinating_DNA-binding_domains	C2H2_zinc_finger_factors	-
ZNF780B	-	Monomer_or_homomultimer	High_specificity_DNA-binding_protein	-	Zinc-coordinating_DNA-binding_domains	C2H2_zinc_finger_factors	-
ZNF781	-	Monomer_or_homomultimer	High_specificity_DNA-binding_protein	-	Zinc-coordinating_DNA-binding_domains	C2H2_zinc_finger_factors	-
ZNF782	-	Monomer_or_homomultimer	High_specificity_DNA-binding_protein	-	Zinc-coordinating_DNA-binding_domains	C2H2_zinc_finger_factors	-
ZNF784	-	Monomer_or_homomultimer	High_specificity_DNA-binding_protein	-	Zinc-coordinating_DNA-binding_domains	C2H2_zinc_finger_factors	no_tissue-specific
ZNF785	-	Monomer_or_homomultimer	High_specificity_DNA-binding_protein	migrant	Zinc-coordinating_DNA-binding_domains	C2H2_zinc_finger_factors	-
ZNF786	-	Monomer_or_homomultimer	High_specificity_DNA-binding_protein	settler	Zinc-coordinating_DNA-binding_domains	C2H2_zinc_finger_factors	-
ZNF787	-	Monomer_or_homomultimer	High_specificity_DNA-binding_protein	-	Zinc-coordinating_DNA-binding_domains	C2H2_zinc_finger_factors	no_tissue-specific
ZNF788	-	Monomer_or_homomultimer	High_specificity_DNA-binding_protein	-	Zinc-coordinating_DNA-binding_domains	C2H2_zinc_finger_factors	tissue-specific
ZNF789	-	Monomer_or_homomultimer	High_specificity_DNA-binding_protein	-	Zinc-coordinating_DNA-binding_domains	C2H2_zinc_finger_factors	-
ZNF79	-	Monomer_or_homomultimer	High_specificity_DNA-binding_protein	pioneer	Zinc-coordinating_DNA-binding_domains	C2H2_zinc_finger_factors	-
ZNF790	-	Monomer_or_homomultimer	High_specificity_DNA-binding_protein	-	Zinc-coordinating_DNA-binding_domains	C2H2_zinc_finger_factors	-
ZNF791	-	Monomer_or_homomultimer	High_specificity_DNA-binding_protein	-	Zinc-coordinating_DNA-binding_domains	C2H2_zinc_finger_factors	no_tissue-specific
ZNF792	-	Monomer_or_homomultimer	High_specificity_DNA-binding_protein	-	Zinc-coordinating_DNA-binding_domains	C2H2_zinc_finger_factors	-
ZNF793	-	Monomer_or_homomultimer	High_specificity_DNA-binding_protein	-	Zinc-coordinating_DNA-binding_domains	C2H2_zinc_finger_factors	-
ZNF799	-	Monomer_or_homomultimer	High_specificity_DNA-binding_protein	-	Zinc-coordinating_DNA-binding_domains	C2H2_zinc_finger_factors	tissue-specific
ZNF8	-	Monomer_or_homomultimer	High_specificity_DNA-binding_protein	settler	Zinc-coordinating_DNA-binding_domains	C2H2_zinc_finger_factors	-
ZNF80	-	Monomer_or_homomultimer	High_specificity_DNA-binding_protein	pioneer	Zinc-coordinating_DNA-binding_domains	C2H2_zinc_finger_factors	-
ZNF800	-	Monomer_or_homomultimer	High_specificity_DNA-binding_protein	-	Zinc-coordinating_DNA-binding_domains	C2H2_zinc_finger_factors	no_tissue-specific
ZNF805	-	Monomer_or_homomultimer	High_specificity_DNA-binding_protein	-	Zinc-coordinating_DNA-binding_domains	C2H2_zinc_finger_factors	tissue-specific
ZNF806	-	-	-	-	Zinc-coordinating_DNA-binding_domains	C2H2_zinc_finger_factors	-
ZNF808	-	Monomer_or_homomultimer	High_specificity_DNA-binding_protein	-	Zinc-coordinating_DNA-binding_domains	C2H2_zinc_finger_factors	-
ZNF81	-	Monomer_or_homomultimer	High_specificity_DNA-binding_protein	pioneer	Zinc-coordinating_DNA-binding_domains	C2H2_zinc_finger_factors	tissue-specific
ZNF813	-	Monomer_or_homomultimer	High_specificity_DNA-binding_protein	-	Zinc-coordinating_DNA-binding_domains	C2H2_zinc_finger_factors	tissue-specific
ZNF814	-	Monomer_or_homomultimer	High_specificity_DNA-binding_protein	-	Zinc-coordinating_DNA-binding_domains	C2H2_zinc_finger_factors	-
ZNF816	-	Monomer_or_homomultimer	High_specificity_DNA-binding_protein	-	Zinc-coordinating_DNA-binding_domains	C2H2_zinc_finger_factors	-
ZNF823	-	Monomer_or_homomultimer	High_specificity_DNA-binding_protein	pioneer	Zinc-coordinating_DNA-binding_domains	C2H2_zinc_finger_factors	-
ZNF827	-	Monomer_or_homomultimer	High_specificity_DNA-binding_protein	-	Zinc-coordinating_DNA-binding_domains	C2H2_zinc_finger_factors	-
ZNF829	-	Monomer_or_homomultimer	High_specificity_DNA-binding_protein	-	Zinc-coordinating_DNA-binding_domains	C2H2_zinc_finger_factors	tissue-specific
ZNF83	-	Monomer_or_homomultimer	High_specificity_DNA-binding_protein	migrant	Zinc-coordinating_DNA-binding_domains	C2H2_zinc_finger_factors	no_tissue-specific
ZNF835	-	Monomer_or_homomultimer	High_specificity_DNA-binding_protein	-	Zinc-coordinating_DNA-binding_domains	C2H2_zinc_finger_factors	-
ZNF836	-	Monomer_or_homomultimer	High_specificity_DNA-binding_protein	-	Zinc-coordinating_DNA-binding_domains	C2H2_zinc_finger_factors	-
ZNF837	-	Monomer_or_homomultimer	High_specificity_DNA-binding_protein	-	Zinc-coordinating_DNA-binding_domains	C2H2_zinc_finger_factors	-
ZNF84	-	Monomer_or_homomultimer	High_specificity_DNA-binding_protein	migrant	Zinc-coordinating_DNA-binding_domains	C2H2_zinc_finger_factors	no_tissue-specific
ZNF840P	-	-	-	-	Zinc-coordinating_DNA-binding_domains	C2H2_zinc_finger_factors	-
ZNF841	-	Monomer_or_homomultimer	High_specificity_DNA-binding_protein	-	Zinc-coordinating_DNA-binding_domains	C2H2_zinc_finger_factors	no_tissue-specific
ZNF844	-	Monomer_or_homomultimer	High_specificity_DNA-binding_protein	-	Zinc-coordinating_DNA-binding_domains	C2H2_zinc_finger_factors	-
ZNF845	-	Monomer_or_homomultimer	High_specificity_DNA-binding_protein	-	Zinc-coordinating_DNA-binding_domains	C2H2_zinc_finger_factors	-
ZNF846	-	Monomer_or_homomultimer	High_specificity_DNA-binding_protein	-	Zinc-coordinating_DNA-binding_domains	C2H2_zinc_finger_factors	-
ZNF85	repressors	Monomer_or_homomultimer	High_specificity_DNA-binding_protein	pioneer	Zinc-coordinating_DNA-binding_domains	C2H2_zinc_finger_factors	-
ZNF853	-	Monomer_or_homomultimer	High_specificity_DNA-binding_protein	-	Zinc-coordinating_DNA-binding_domains	C2H2_zinc_finger_factors	no_tissue-specific
ZNF860	-	Monomer_or_homomultimer	High_specificity_DNA-binding_protein	-	Zinc-coordinating_DNA-binding_domains	C2H2_zinc_finger_factors	-
ZNF876P	-	-	-	-	Zinc-coordinating_DNA-binding_domains	C2H2_zinc_finger_factors	-
ZNF878	-	Monomer_or_homomultimer	High_specificity_DNA-binding_protein	-	Zinc-coordinating_DNA-binding_domains	C2H2_zinc_finger_factors	-
ZNF879	-	Monomer_or_homomultimer	High_specificity_DNA-binding_protein	-	Zinc-coordinating_DNA-binding_domains	C2H2_zinc_finger_factors	-
ZNF880	-	Monomer_or_homomultimer	High_specificity_DNA-binding_protein	-	Zinc-coordinating_DNA-binding_domains	C2H2_zinc_finger_factors	-
ZNF883	-	Monomer_or_homomultimer	High_specificity_DNA-binding_protein	-	Zinc-coordinating_DNA-binding_domains	C2H2_zinc_finger_factors	-
ZNF891	-	Monomer_or_homomultimer	High_specificity_DNA-binding_protein	-	Zinc-coordinating_DNA-binding_domains	C2H2_zinc_finger_factors	tissue-specific
ZNF90	-	Monomer_or_homomultimer	High_specificity_DNA-binding_protein	pioneer	Zinc-coordinating_DNA-binding_domains	C2H2_zinc_finger_factors	tissue-specific
ZNF91	repressors	Monomer_or_homomultimer	High_specificity_DNA-binding_protein	migrant	Zinc-coordinating_DNA-binding_domains	C2H2_zinc_finger_factors	-
ZNF92	-	Monomer_or_homomultimer	High_specificity_DNA-binding_protein	pioneer	Zinc-coordinating_DNA-binding_domains	C2H2_zinc_finger_factors	-
ZNF93	repressors	Monomer_or_homomultimer	High_specificity_DNA-binding_protein	pioneer	Zinc-coordinating_DNA-binding_domains	C2H2_zinc_finger_factors	tissue-specific
ZNF98	-	Monomer_or_homomultimer	High_specificity_DNA-binding_protein	-	Zinc-coordinating_DNA-binding_domains	C2H2_zinc_finger_factors	-
ZNF99	-	Monomer_or_homomultimer	High_specificity_DNA-binding_protein	-	Zinc-coordinating_DNA-binding_domains	C2H2_zinc_finger_factors	-
ZNFX1	-	-	Not_a_DNA_binding_protein	settler	Yet_undefined_DNA-binding_domains	NFX1-type_putative_zinc_finger_factors	no_tissue-specific
ZSCAN1	-	Monomer_or_homomultimer	High_specificity_DNA-binding_protein	pioneer	Zinc-coordinating_DNA-binding_domains	C2H2_zinc_finger_factors	-
ZSCAN10	repressors	Monomer_or_homomultimer	High_specificity_DNA-binding_protein	migrant	Zinc-coordinating_DNA-binding_domains	C2H2_zinc_finger_factors	-
ZSCAN12	-	Monomer_or_homomultimer	High_specificity_DNA-binding_protein	pioneer	Zinc-coordinating_DNA-binding_domains	C2H2_zinc_finger_factors	-
ZSCAN16	-	Monomer_or_homomultimer	High_specificity_DNA-binding_protein	pioneer	Zinc-coordinating_DNA-binding_domains	C2H2_zinc_finger_factors	no_tissue-specific
ZSCAN2	-	Monomer_or_homomultimer	High_specificity_DNA-binding_protein	migrant	Zinc-coordinating_DNA-binding_domains	C2H2_zinc_finger_factors	-
ZSCAN20	-	Monomer_or_homomultimer	High_specificity_DNA-binding_protein	-	Zinc-coordinating_DNA-binding_domains	C2H2_zinc_finger_factors	tissue-specific
ZSCAN21	-	Monomer_or_homomultimer	High_specificity_DNA-binding_protein	migrant	Zinc-coordinating_DNA-binding_domains	C2H2_zinc_finger_factors	no_tissue-specific
ZSCAN22	-	Monomer_or_homomultimer	High_specificity_DNA-binding_protein	migrant	Zinc-coordinating_DNA-binding_domains	C2H2_zinc_finger_factors	-
ZSCAN23	-	Monomer_or_homomultimer	High_specificity_DNA-binding_protein	migrant	Zinc-coordinating_DNA-binding_domains	C2H2_zinc_finger_factors	-
ZSCAN25	-	Monomer_or_homomultimer	High_specificity_DNA-binding_protein	-	Zinc-coordinating_DNA-binding_domains	C2H2_zinc_finger_factors	-
ZSCAN26	-	Monomer_or_homomultimer	High_specificity_DNA-binding_protein	pioneer	Zinc-coordinating_DNA-binding_domains	C2H2_zinc_finger_factors	no_tissue-specific
ZSCAN29	-	Monomer_or_homomultimer	High_specificity_DNA-binding_protein	-	Zinc-coordinating_DNA-binding_domains	C2H2_zinc_finger_factors	no_tissue-specific
ZSCAN30	-	Monomer_or_homomultimer	High_specificity_DNA-binding_protein	-	Zinc-coordinating_DNA-binding_domains	C2H2_zinc_finger_factors	no_tissue-specific
ZSCAN31	-	Monomer_or_homomultimer	High_specificity_DNA-binding_protein	migrant	Zinc-coordinating_DNA-binding_domains	C2H2_zinc_finger_factors	-
ZSCAN32	-	Monomer_or_homomultimer	High_specificity_DNA-binding_protein	migrant	Zinc-coordinating_DNA-binding_domains	C2H2_zinc_finger_factors	-
ZSCAN4	-	Monomer_or_homomultimer	High_specificity_DNA-binding_protein	pioneer	Zinc-coordinating_DNA-binding_domains	C2H2_zinc_finger_factors	-
ZSCAN5A	-	Monomer_or_homomultimer	High_specificity_DNA-binding_protein	pioneer	Zinc-coordinating_DNA-binding_domains	C2H2_zinc_finger_factors	tissue-specific
ZSCAN5B	-	Monomer_or_homomultimer	High_specificity_DNA-binding_protein	-	Zinc-coordinating_DNA-binding_domains	C2H2_zinc_finger_factors	tissue-specific
ZSCAN5C	-	Monomer_or_homomultimer	High_specificity_DNA-binding_protein	-	Zinc-coordinating_DNA-binding_domains	C2H2_zinc_finger_factors	-
ZSCAN5DP	-	-	Not_a_DNA_binding_protein	-	-	-	-
ZSCAN9	-	Monomer_or_homomultimer	High_specificity_DNA-binding_protein	pioneer	Zinc-coordinating_DNA-binding_domains	C2H2_zinc_finger_factors	no_tissue-specific
ZXDA	-	Monomer_or_homomultimer	High_specificity_DNA-binding_protein	-	Zinc-coordinating_DNA-binding_domains	C2H2_zinc_finger_factors	tissue-specific
ZXDB	-	Monomer_or_homomultimer	High_specificity_DNA-binding_protein	-	Zinc-coordinating_DNA-binding_domains	C2H2_zinc_finger_factors	-
ZXDC	-	Monomer_or_homomultimer	High_specificity_DNA-binding_protein	-	Zinc-coordinating_DNA-binding_domains	C2H2_zinc_finger_factors	no_tissue-specific
