# Supplementary material for: Benchmark and integration of resources for the estimation of human transcription factor activities
Source: HighWire-hosted journal article supplement (doi:10.1101/gr.240663.118), 2019-07-24
Supplement: Supplemental_Tables.zip [file GarciaAlonso_supplemental_table_S2.xlsx]

## Sheet: Sheet 1
#Table S2. Number of TFs, targets and interactions retrieved for each regulon dataset in the study. NOTE: "con" and “opRegion” in the TFBS mean that the conservation and open region (or chromatin accessibility information) filters are applied, respectively, for the TFBS predictions.
regulon_dataset	regulon_source	regulon_evidence	TFs	targets	TF_target_interactions
ReMap_top_100	ReMap	chipSeq	303	5069	17570
ReMap_top_1000	ReMap	chipSeq	304	17211	98063
ReMap_top_200	ReMap	chipSeq	304	7779	29769
ReMap_top_500	ReMap	chipSeq	304	13146	60538
fantom4	fantom4	curated_databases	18	80	131
HTRIdb	HTRIdb	curated_databases	73	1358	1943
IntAct	IntAct	curated_databases	50	361	560
kegg	kegg	curated_databases	95	525	1875
NFIRegulomeDB	NFIRegulomeDB	curated_databases	2	9	10
oreganno_signed	oreganno	curated_databases	16	386	418
oreganno	oreganno	curated_databases	16	386	418
PAZAR	PAZAR	curated_databases	31	11508	45405
reviews	reviews	curated_databases	4	238	244
tfact_signed	tfact	curated_databases	51	805	1290
tfact	tfact	curated_databases	51	805	1290
TFe_signed	TFe	curated_databases	30	361	424
TFe	TFe	curated_databases	30	361	424
tred_via_RegNetwork	tred	curated_databases	79	2871	6098
trrd_via_tfact_signed	trrd	curated_databases	9	149	175
trrd_via_tfact	trrd	curated_databases	9	149	175
trrust_signed	trrust	curated_databases	292	2283	6651
trrust	trrust	curated_databases	292	2283	6651
inferredGTEx_Ntissues10	inferredGTEx	inferredGTEx	928	9111	34313
inferredGTEx_Ntissues2	inferredGTEx	inferredGTEx	1300	16250	984597
inferredGTEx_Ntissues3	inferredGTEx	inferredGTEx	1299	16292	481150
inferredGTEx_Ntissues5	inferredGTEx	inferredGTEx	1266	15034	183115
hocomocov11_top100_con	hocomocov11	TFBS_scanning	398	4454	7406
hocomocov11_top100_opRegion_con	hocomocov11	TFBS_scanning	382	2078	3288
hocomocov11_top100_opRegion	hocomocov11	TFBS_scanning	398	6766	14595
hocomocov11_top100	hocomocov11	TFBS_scanning	398	12941	32007
hocomocov11_top1000_con	hocomocov11	TFBS_scanning	398	13302	71681
hocomocov11_top1000_opRegion_con	hocomocov11	TFBS_scanning	398	7360	31309
hocomocov11_top1000_opRegion	hocomocov11	TFBS_scanning	398	11747	129744
hocomocov11_top1000	hocomocov11	TFBS_scanning	398	18001	265500
hocomocov11_top200_con	hocomocov11	TFBS_scanning	398	6934	14738
hocomocov11_top200_opRegion_con	hocomocov11	TFBS_scanning	398	3365	6465
hocomocov11_top200_opRegion	hocomocov11	TFBS_scanning	398	9205	28680
hocomocov11_top200	hocomocov11	TFBS_scanning	398	16442	63674
hocomocov11_top500_con	hocomocov11	TFBS_scanning	398	10711	36688
hocomocov11_top500_opRegion_con	hocomocov11	TFBS_scanning	398	5552	15836
hocomocov11_top500_opRegion	hocomocov11	TFBS_scanning	398	11266	69281
hocomocov11_top500	hocomocov11	TFBS_scanning	398	18545	153978
jaspar2018_top100_con	jaspar2018	TFBS_scanning	501	4239	8941
jaspar2018_top100_opRegion_con	jaspar2018	TFBS_scanning	467	1964	3750
jaspar2018_top100_opRegion	jaspar2018	TFBS_scanning	501	6410	16610
jaspar2018_top100	jaspar2018	TFBS_scanning	501	12345	38350
jaspar2018_top1000_con	jaspar2018	TFBS_scanning	501	12762	83671
jaspar2018_top1000_opRegion_con	jaspar2018	TFBS_scanning	501	6914	34984
jaspar2018_top1000_opRegion	jaspar2018	TFBS_scanning	501	11697	147043
jaspar2018_top1000	jaspar2018	TFBS_scanning	501	17975	312081
jaspar2018_top200_con	jaspar2018	TFBS_scanning	501	6541	17735
jaspar2018_top200_opRegion_con	jaspar2018	TFBS_scanning	499	3150	7444
jaspar2018_top200_opRegion	jaspar2018	TFBS_scanning	501	8774	32307
jaspar2018_top200	jaspar2018	TFBS_scanning	501	15851	76120
jaspar2018_top500_con	jaspar2018	TFBS_scanning	501	10210	43919
jaspar2018_top500_opRegion_con	jaspar2018	TFBS_scanning	501	5264	18015
jaspar2018_top500_opRegion	jaspar2018	TFBS_scanning	501	11059	78162
jaspar2018_top500	jaspar2018	TFBS_scanning	501	18377	183415
