# Supplementary material for: Benchmark and integration of resources for the estimation of human transcription factor activities
Source: HighWire-hosted journal article supplement (doi:10.1101/gr.240663.118), 2019-07-24
Supplement: Supplemental_Tables.zip [file GarciaAlonso_supplemental_table_S3_regulonsNormal.xlsx]

## Sheet: Sheet 1 - Table S3. Scored TF-t
Table S3. Scored TF-target interactions for normal tissues. Columns indicate: 1) TF, 2) Target, 3) Effect, 4) Confidence score; 5) logical if from curated database, 6) logical if from ChIPseq, 7) logical if from TF binding motif predictions 8) logical if inferred from GTEx expression data, 9) curated database name, 10) ChIPseq resource name, 10) TF binding motif name, 11) inference strategy name,…
TF	target	effect	score	is_evidence_curateddatabase	is_evidence_chipSeq	is_evidence_TFbindingMotif	is_evidence_coexpression	which_curateddatabase	which_chipSeq	which_TFbindingMotif	which_coexpression	pubmedID_from_curated_resources	kegg_pathway
ADNP	AASDH	0	E	FALSE	FALSE	FALSE	TRUE	none	none	none	ARACNe-GTEx	-	-
ADNP	AASDHPPT	0	E	FALSE	FALSE	FALSE	TRUE	none	none	none	ARACNe-GTEx	-	-
ADNP	ABCB10	0	E	FALSE	FALSE	FALSE	TRUE	none	none	none	ARACNe-GTEx	-	-
ADNP	ABCC1	0	D	FALSE	TRUE	FALSE	FALSE	none	ReMap	none	none	-	-
ADNP	ABCC6	0	D	FALSE	TRUE	FALSE	FALSE	none	ReMap	none	none	-	-
ADNP	ABHD5	0	D	FALSE	TRUE	FALSE	FALSE	none	ReMap	none	none	-	-
ADNP	ABT1	0	D	FALSE	TRUE	FALSE	FALSE	none	ReMap	none	none	-	-
ADNP	AC002066.1	0	D	FALSE	TRUE	FALSE	FALSE	none	ReMap	none	none	-	-
ADNP	AC002127.4	0	D	FALSE	TRUE	FALSE	FALSE	none	ReMap	none	none	-	-
ADNP	AC005514.2	0	D	FALSE	TRUE	FALSE	FALSE	none	ReMap	none	none	-	-
ADNP	AC006076.1	0	D	FALSE	TRUE	FALSE	FALSE	none	ReMap	none	none	-	-
ADNP	AC006552.1	0	D	FALSE	TRUE	FALSE	FALSE	none	ReMap	none	none	-	-
ADNP	AC007319.1	0	D	FALSE	TRUE	FALSE	FALSE	none	ReMap	none	none	-	-
ADNP	AC007792.1	0	D	FALSE	TRUE	FALSE	FALSE	none	ReMap	none	none	-	-
ADNP	AC010649.1	0	D	FALSE	TRUE	FALSE	FALSE	none	ReMap	none	none	-	-
ADNP	AC011288.2	0	D	FALSE	TRUE	FALSE	FALSE	none	ReMap	none	none	-	-
ADNP	AC024084.1	0	D	FALSE	TRUE	FALSE	FALSE	none	ReMap	none	none	-	-
ADNP	AC073284.4	0	D	FALSE	TRUE	FALSE	FALSE	none	ReMap	none	none	-	-
ADNP	AC092171.4	0	D	FALSE	TRUE	FALSE	FALSE	none	ReMap	none	none	-	-
ADNP	ACBD6	0	D	FALSE	TRUE	FALSE	FALSE	none	ReMap	none	none	-	-
ADNP	ACP7	0	D	FALSE	TRUE	FALSE	FALSE	none	ReMap	none	none	-	-
ADNP	ACTL6A	0	E	FALSE	FALSE	FALSE	TRUE	none	none	none	ARACNe-GTEx	-	-
ADNP	ACTR6	0	E	FALSE	FALSE	FALSE	TRUE	none	none	none	ARACNe-GTEx	-	-
ADNP	ACVR2A	0	E	FALSE	FALSE	FALSE	TRUE	none	none	none	ARACNe-GTEx	-	-
ADNP	ADAMTS10	0	D	FALSE	TRUE	FALSE	FALSE	none	ReMap	none	none	-	-
ADNP	ADAMTS14	0	D	FALSE	TRUE	FALSE	FALSE	none	ReMap	none	none	-	-
ADNP	ADCY7	0	D	FALSE	TRUE	FALSE	FALSE	none	ReMap	none	none	-	-
ADNP	ADGRG1	0	D	FALSE	TRUE	FALSE	FALSE	none	ReMap	none	none	-	-
ADNP	ADGRV1	0	D	FALSE	TRUE	FALSE	FALSE	none	ReMap	none	none	-	-
ADNP	AFTPH	0	E	FALSE	FALSE	FALSE	TRUE	none	none	none	ARACNe-GTEx	-	-
ADNP	AGGF1	0	E	FALSE	FALSE	FALSE	TRUE	none	none	none	ARACNe-GTEx	-	-
ADNP	AGO1	0	E	FALSE	FALSE	FALSE	TRUE	none	none	none	ARACNe-GTEx	-	-
ADNP	AHCY	0	D	FALSE	TRUE	FALSE	FALSE	none	ReMap	none	none	-	-
ADNP	AIF1L	0	D	FALSE	TRUE	FALSE	FALSE	none	ReMap	none	none	-	-
ADNP	AIM1L	0	D	FALSE	TRUE	FALSE	FALSE	none	ReMap	none	none	-	-
ADNP	AKAP10	0	E	FALSE	FALSE	FALSE	TRUE	none	none	none	ARACNe-GTEx	-	-
ADNP	AKAP11	0	E	FALSE	FALSE	FALSE	TRUE	none	none	none	ARACNe-GTEx	-	-
ADNP	AKNA	0	D	FALSE	TRUE	FALSE	FALSE	none	ReMap	none	none	-	-
ADNP	AKT2	0	D	FALSE	TRUE	FALSE	FALSE	none	ReMap	none	none	-	-
ADNP	ALDH1A1	0	D	FALSE	TRUE	FALSE	FALSE	none	ReMap	none	none	-	-
ADNP	ALDH1A2	0	D	FALSE	TRUE	FALSE	FALSE	none	ReMap	none	none	-	-
ADNP	ALG10	0	E	FALSE	FALSE	FALSE	TRUE	none	none	none	ARACNe-GTEx	-	-
ADNP	ALKBH1	0	E	FALSE	FALSE	FALSE	TRUE	none	none	none	ARACNe-GTEx	-	-
ADNP	ALKBH8	0	E	FALSE	FALSE	FALSE	TRUE	none	none	none	ARACNe-GTEx	-	-
ADNP	ALX4	0	D	FALSE	TRUE	FALSE	FALSE	none	ReMap	none	none	-	-
ADNP	AMER1	0	E	FALSE	FALSE	FALSE	TRUE	none	none	none	ARACNe-GTEx	-	-
ADNP	AMMECR1L	0	E	FALSE	FALSE	FALSE	TRUE	none	none	none	ARACNe-GTEx	-	-
ADNP	ANAPC1	0	E	FALSE	FALSE	FALSE	TRUE	none	none	none	ARACNe-GTEx	-	-
ADNP	ANGPT1	0	D	FALSE	TRUE	FALSE	FALSE	none	ReMap	none	none	-	-
ADNP	ANGPTL2	0	D	FALSE	TRUE	FALSE	FALSE	none	ReMap	none	none	-	-
ADNP	ANKIB1	0	E	FALSE	FALSE	FALSE	TRUE	none	none	none	ARACNe-GTEx	-	-
ADNP	ANKRD17	0	E	FALSE	FALSE	FALSE	TRUE	none	none	none	ARACNe-GTEx	-	-
ADNP	ANKRD24	0	D	FALSE	TRUE	FALSE	FALSE	none	ReMap	none	none	-	-
ADNP	ANKRD27	0	E	FALSE	FALSE	FALSE	TRUE	none	none	none	ARACNe-GTEx	-	-
ADNP	ANKRD50	0	E	FALSE	FALSE	FALSE	TRUE	none	none	none	ARACNe-GTEx	-	-
ADNP	ANO6	0	D	FALSE	TRUE	FALSE	FALSE	none	ReMap	none	none	-	-
ADNP	ANTXR2	0	D	FALSE	TRUE	FALSE	FALSE	none	ReMap	none	none	-	-
ADNP	AP000442.4	0	D	FALSE	TRUE	FALSE	FALSE	none	ReMap	none	none	-	-
ADNP	AP1M1	0	D	FALSE	TRUE	FALSE	FALSE	none	ReMap	none	none	-	-
ADNP	AP3M1	0	E	FALSE	FALSE	FALSE	TRUE	none	none	none	ARACNe-GTEx	-	-
ADNP	AP5M1	0	E	FALSE	FALSE	FALSE	TRUE	none	none	none	ARACNe-GTEx	-	-
ADNP	APC	0	E	FALSE	FALSE	FALSE	TRUE	none	none	none	ARACNe-GTEx	-	-
ADNP	APOOL	0	E	FALSE	FALSE	FALSE	TRUE	none	none	none	ARACNe-GTEx	-	-
ADNP	APPBP2	0	E	FALSE	FALSE	FALSE	TRUE	none	none	none	ARACNe-GTEx	-	-
ADNP	AQR	0	E	FALSE	FALSE	FALSE	TRUE	none	none	none	ARACNe-GTEx	-	-
ADNP	ARFGEF1	0	E	FALSE	FALSE	FALSE	TRUE	none	none	none	ARACNe-GTEx	-	-
ADNP	ARFIP1	0	E	FALSE	FALSE	FALSE	TRUE	none	none	none	ARACNe-GTEx	-	-
ADNP	ARHGEF1	0	D	FALSE	TRUE	FALSE	FALSE	none	ReMap	none	none	-	-
ADNP	ARHGEF10L	0	D	FALSE	TRUE	FALSE	FALSE	none	ReMap	none	none	-	-
ADNP	ARHGEF11	0	E	FALSE	FALSE	FALSE	TRUE	none	none	none	ARACNe-GTEx	-	-
ADNP	ARHGEF37	0	D	FALSE	TRUE	FALSE	FALSE	none	ReMap	none	none	-	-
ADNP	ARID1A	0	E	FALSE	FALSE	FALSE	TRUE	none	none	none	ARACNe-GTEx	-	-
ADNP	ARID1B	0	E	FALSE	FALSE	FALSE	TRUE	none	none	none	ARACNe-GTEx	-	-
ADNP	ARID2	0	E	FALSE	FALSE	FALSE	TRUE	none	none	none	ARACNe-GTEx	-	-
ADNP	ARID3A	0	D	FALSE	TRUE	FALSE	FALSE	none	ReMap	none	none	-	-
ADNP	ARID5B	0	D	FALSE	TRUE	FALSE	FALSE	none	ReMap	none	none	-	-
ADNP	ARL5A	0	D	FALSE	TRUE	FALSE	FALSE	none	ReMap	none	none	-	-
ADNP	ARPC3P5	0	D	FALSE	TRUE	FALSE	FALSE	none	ReMap	none	none	-	-
ADNP	ARSK	0	E	FALSE	FALSE	FALSE	TRUE	none	none	none	ARACNe-GTEx	-	-
ADNP	ASAP1	0	D	FALSE	TRUE	FALSE	FALSE	none	ReMap	none	none	-	-
ADNP	ASB7	0	E	FALSE	FALSE	FALSE	TRUE	none	none	none	ARACNe-GTEx	-	-
ADNP	ASCC2	0	D	FALSE	TRUE	FALSE	FALSE	none	ReMap	none	none	-	-
ADNP	ASF1A	0	E	FALSE	FALSE	FALSE	TRUE	none	none	none	ARACNe-GTEx	-	-
ADNP	ASH1L	0	E	FALSE	FALSE	FALSE	TRUE	none	none	none	ARACNe-GTEx	-	-
ADNP	ASXL2	0	E	FALSE	FALSE	FALSE	TRUE	none	none	none	ARACNe-GTEx	-	-
ADNP	ATF1	0	E	FALSE	FALSE	FALSE	TRUE	none	none	none	ARACNe-GTEx	-	-
ADNP	ATF7IP	0	C	FALSE	TRUE	FALSE	TRUE	none	ReMap	none	ARACNe-GTEx	-	-
ADNP	ATG14	0	D	FALSE	TRUE	FALSE	FALSE	none	ReMap	none	none	-	-
ADNP	ATP2B1	0	D	FALSE	TRUE	FALSE	FALSE	none	ReMap	none	none	-	-
ADNP	ATP8B3	0	D	FALSE	TRUE	FALSE	FALSE	none	ReMap	none	none	-	-
ADNP	ATRX	0	E	FALSE	FALSE	FALSE	TRUE	none	none	none	ARACNe-GTEx	-	-
ADNP	ATXN7L3B	0	E	FALSE	FALSE	FALSE	TRUE	none	none	none	ARACNe-GTEx	-	-
ADNP	AXL	0	D	FALSE	TRUE	FALSE	FALSE	none	ReMap	none	none	-	-
ADNP	BAG5	0	E	FALSE	FALSE	FALSE	TRUE	none	none	none	ARACNe-GTEx	-	-
ADNP	BBC3	0	D	FALSE	TRUE	FALSE	FALSE	none	ReMap	none	none	-	-
ADNP	BBS10	0	E	FALSE	FALSE	FALSE	TRUE	none	none	none	ARACNe-GTEx	-	-
ADNP	BHLHE40	0	D	FALSE	TRUE	FALSE	FALSE	none	ReMap	none	none	-	-
ADNP	BIRC6	0	E	FALSE	FALSE	FALSE	TRUE	none	none	none	ARACNe-GTEx	-	-
ADNP	BOD1L1	0	E	FALSE	FALSE	FALSE	TRUE	none	none	none	ARACNe-GTEx	-	-
ADNP	BPTF	0	E	FALSE	FALSE	FALSE	TRUE	none	none	none	ARACNe-GTEx	-	-
ADNP	BRD2	0	E	FALSE	FALSE	FALSE	TRUE	none	none	none	ARACNe-GTEx	-	-
ADNP	BRWD1	0	E	FALSE	FALSE	FALSE	TRUE	none	none	none	ARACNe-GTEx	-	-
ADNP	BTBD7	0	E	FALSE	FALSE	FALSE	TRUE	none	none	none	ARACNe-GTEx	-	-
ADNP	BTRC	0	E	FALSE	FALSE	FALSE	TRUE	none	none	none	ARACNe-GTEx	-	-
ADNP	BUB3	0	E	FALSE	FALSE	FALSE	TRUE	none	none	none	ARACNe-GTEx	-	-
ADNP	C12orf65	0	E	FALSE	FALSE	FALSE	TRUE	none	none	none	ARACNe-GTEx	-	-
ADNP	C12orf66	0	E	FALSE	FALSE	FALSE	TRUE	none	none	none	ARACNe-GTEx	-	-
ADNP	C12ORF76	0	D	FALSE	TRUE	FALSE	FALSE	none	ReMap	none	none	-	-
ADNP	C16ORF45	0	D	FALSE	TRUE	FALSE	FALSE	none	ReMap	none	none	-	-
ADNP	C16orf70	0	E	FALSE	FALSE	FALSE	TRUE	none	none	none	ARACNe-GTEx	-	-
ADNP	C17orf80	0	E	FALSE	FALSE	FALSE	TRUE	none	none	none	ARACNe-GTEx	-	-
ADNP	C19ORF66	0	D	FALSE	TRUE	FALSE	FALSE	none	ReMap	none	none	-	-
ADNP	C1ORF100	0	D	FALSE	TRUE	FALSE	FALSE	none	ReMap	none	none	-	-
ADNP	C1ORF127	0	D	FALSE	TRUE	FALSE	FALSE	none	ReMap	none	none	-	-
ADNP	C1ORF167	0	D	FALSE	TRUE	FALSE	FALSE	none	ReMap	none	none	-	-
ADNP	C2orf42	0	E	FALSE	FALSE	FALSE	TRUE	none	none	none	ARACNe-GTEx	-	-
ADNP	C2orf49	0	E	FALSE	FALSE	FALSE	TRUE	none	none	none	ARACNe-GTEx	-	-
ADNP	C5orf24	0	E	FALSE	FALSE	FALSE	TRUE	none	none	none	ARACNe-GTEx	-	-
ADNP	C6ORF223	0	D	FALSE	TRUE	FALSE	FALSE	none	ReMap	none	none	-	-
ADNP	C6orf62	0	E	FALSE	FALSE	FALSE	TRUE	none	none	none	ARACNe-GTEx	-	-
ADNP	CACNA1A	0	D	FALSE	TRUE	FALSE	FALSE	none	ReMap	none	none	-	-
ADNP	CACNA1I	0	D	FALSE	TRUE	FALSE	FALSE	none	ReMap	none	none	-	-
ADNP	CAND1	0	E	FALSE	FALSE	FALSE	TRUE	none	none	none	ARACNe-GTEx	-	-
ADNP	CASP2	0	E	FALSE	FALSE	FALSE	TRUE	none	none	none	ARACNe-GTEx	-	-
ADNP	CASP8AP2	0	E	FALSE	FALSE	FALSE	TRUE	none	none	none	ARACNe-GTEx	-	-
ADNP	CBX1	0	E	FALSE	FALSE	FALSE	TRUE	none	none	none	ARACNe-GTEx	-	-
ADNP	CBX5	0	E	FALSE	FALSE	FALSE	TRUE	none	none	none	ARACNe-GTEx	-	-
ADNP	CCDC187	0	D	FALSE	TRUE	FALSE	FALSE	none	ReMap	none	none	-	-
ADNP	CCDC26	0	D	FALSE	TRUE	FALSE	FALSE	none	ReMap	none	none	-	-
ADNP	CCDC6	0	E	FALSE	FALSE	FALSE	TRUE	none	none	none	ARACNe-GTEx	-	-
ADNP	CCNY	0	D	FALSE	TRUE	FALSE	FALSE	none	ReMap	none	none	-	-
ADNP	CD83P1	0	D	FALSE	TRUE	FALSE	FALSE	none	ReMap	none	none	-	-
ADNP	CDC23	0	E	FALSE	FALSE	FALSE	TRUE	none	none	none	ARACNe-GTEx	-	-
ADNP	CDC40	0	E	FALSE	FALSE	FALSE	TRUE	none	none	none	ARACNe-GTEx	-	-
ADNP	CDCP1	0	D	FALSE	TRUE	FALSE	FALSE	none	ReMap	none	none	-	-
ADNP	CDH1	0	D	FALSE	TRUE	FALSE	FALSE	none	ReMap	none	none	-	-
ADNP	CDH23	0	D	FALSE	TRUE	FALSE	FALSE	none	ReMap	none	none	-	-
ADNP	CDHR3	0	D	FALSE	TRUE	FALSE	FALSE	none	ReMap	none	none	-	-
ADNP	CDK13	0	E	FALSE	FALSE	FALSE	TRUE	none	none	none	ARACNe-GTEx	-	-
ADNP	CDK5RAP2	0	D	FALSE	TRUE	FALSE	FALSE	none	ReMap	none	none	-	-
ADNP	CDKN2AIP	0	E	FALSE	FALSE	FALSE	TRUE	none	none	none	ARACNe-GTEx	-	-
ADNP	CEBPB	0	D	FALSE	TRUE	FALSE	FALSE	none	ReMap	none	none	-	-
ADNP	CEP78	0	E	FALSE	FALSE	FALSE	TRUE	none	none	none	ARACNe-GTEx	-	-
ADNP	CEP97	0	E	FALSE	FALSE	FALSE	TRUE	none	none	none	ARACNe-GTEx	-	-
ADNP	CEPT1	0	E	FALSE	FALSE	FALSE	TRUE	none	none	none	ARACNe-GTEx	-	-
ADNP	CERS6	0	D	FALSE	TRUE	FALSE	FALSE	none	ReMap	none	none	-	-
ADNP	CFAP157	0	D	FALSE	TRUE	FALSE	FALSE	none	ReMap	none	none	-	-
ADNP	CGGBP1	0	E	FALSE	FALSE	FALSE	TRUE	none	none	none	ARACNe-GTEx	-	-
ADNP	CHAMP1	0	E	FALSE	FALSE	FALSE	TRUE	none	none	none	ARACNe-GTEx	-	-
ADNP	CHD6	0	E	FALSE	FALSE	FALSE	TRUE	none	none	none	ARACNe-GTEx	-	-
ADNP	CHD8	0	E	FALSE	FALSE	FALSE	TRUE	none	none	none	ARACNe-GTEx	-	-
ADNP	CHD9	0	E	FALSE	FALSE	FALSE	TRUE	none	none	none	ARACNe-GTEx	-	-
ADNP	CHST11	0	D	FALSE	TRUE	FALSE	FALSE	none	ReMap	none	none	-	-
ADNP	CHST3	0	D	FALSE	TRUE	FALSE	FALSE	none	ReMap	none	none	-	-
ADNP	CIITA	0	D	FALSE	TRUE	FALSE	FALSE	none	ReMap	none	none	-	-
ADNP	CKM	0	D	FALSE	TRUE	FALSE	FALSE	none	ReMap	none	none	-	-
ADNP	CLIP1	0	D	FALSE	TRUE	FALSE	FALSE	none	ReMap	none	none	-	-
ADNP	CLIP2	0	D	FALSE	TRUE	FALSE	FALSE	none	ReMap	none	none	-	-
ADNP	CMIP	0	D	FALSE	TRUE	FALSE	FALSE	none	ReMap	none	none	-	-
ADNP	CMKLR1	0	D	FALSE	TRUE	FALSE	FALSE	none	ReMap	none	none	-	-
ADNP	CMTM4	0	E	FALSE	FALSE	FALSE	TRUE	none	none	none	ARACNe-GTEx	-	-
ADNP	CMTR2	0	E	FALSE	FALSE	FALSE	TRUE	none	none	none	ARACNe-GTEx	-	-
ADNP	CNGB1	0	D	FALSE	TRUE	FALSE	FALSE	none	ReMap	none	none	-	-
ADNP	CNKSR3	0	D	FALSE	TRUE	FALSE	FALSE	none	ReMap	none	none	-	-
ADNP	CNN1	0	D	FALSE	TRUE	FALSE	FALSE	none	ReMap	none	none	-	-
ADNP	CNOT1	0	E	FALSE	FALSE	FALSE	TRUE	none	none	none	ARACNe-GTEx	-	-
ADNP	CNOT10	0	E	FALSE	FALSE	FALSE	TRUE	none	none	none	ARACNe-GTEx	-	-
ADNP	CNOT4	0	E	FALSE	FALSE	FALSE	TRUE	none	none	none	ARACNe-GTEx	-	-
ADNP	CNOT6	0	E	FALSE	FALSE	FALSE	TRUE	none	none	none	ARACNe-GTEx	-	-
ADNP	CNOT7	0	E	FALSE	FALSE	FALSE	TRUE	none	none	none	ARACNe-GTEx	-	-
ADNP	COG2	0	E	FALSE	FALSE	FALSE	TRUE	none	none	none	ARACNe-GTEx	-	-
ADNP	COG8	0	E	FALSE	FALSE	FALSE	TRUE	none	none	none	ARACNe-GTEx	-	-
ADNP	COIL	0	E	FALSE	FALSE	FALSE	TRUE	none	none	none	ARACNe-GTEx	-	-
ADNP	COL26A1	0	D	FALSE	TRUE	FALSE	FALSE	none	ReMap	none	none	-	-
ADNP	COL27A1	0	D	FALSE	TRUE	FALSE	FALSE	none	ReMap	none	none	-	-
ADNP	COLGALT2	0	D	FALSE	TRUE	FALSE	FALSE	none	ReMap	none	none	-	-
ADNP	COMMD2	0	E	FALSE	FALSE	FALSE	TRUE	none	none	none	ARACNe-GTEx	-	-
ADNP	COPS5	0	E	FALSE	FALSE	FALSE	TRUE	none	none	none	ARACNe-GTEx	-	-
ADNP	CORO2A	0	D	FALSE	TRUE	FALSE	FALSE	none	ReMap	none	none	-	-
ADNP	COX6A1P2	0	D	FALSE	TRUE	FALSE	FALSE	none	ReMap	none	none	-	-
ADNP	CPEB4	0	D	FALSE	TRUE	FALSE	FALSE	none	ReMap	none	none	-	-
ADNP	CPNE2	0	D	FALSE	TRUE	FALSE	FALSE	none	ReMap	none	none	-	-
ADNP	CPPED1	0	D	FALSE	TRUE	FALSE	FALSE	none	ReMap	none	none	-	-
ADNP	CRADD	0	D	FALSE	TRUE	FALSE	FALSE	none	ReMap	none	none	-	-
ADNP	CRB2	0	D	FALSE	TRUE	FALSE	FALSE	none	ReMap	none	none	-	-
ADNP	CREB1	0	E	FALSE	FALSE	FALSE	TRUE	none	none	none	ARACNe-GTEx	-	-
ADNP	CREBBP	0	E	FALSE	FALSE	FALSE	TRUE	none	none	none	ARACNe-GTEx	-	-
ADNP	CRISPLD2	0	D	FALSE	TRUE	FALSE	FALSE	none	ReMap	none	none	-	-
ADNP	CRKL	0	E	FALSE	FALSE	FALSE	TRUE	none	none	none	ARACNe-GTEx	-	-
ADNP	CSF3R	0	D	FALSE	TRUE	FALSE	FALSE	none	ReMap	none	none	-	-
ADNP	CSNK1G1	0	E	FALSE	FALSE	FALSE	TRUE	none	none	none	ARACNe-GTEx	-	-
ADNP	CSTF1	0	E	FALSE	FALSE	FALSE	TRUE	none	none	none	ARACNe-GTEx	-	-
ADNP	CTA	0	D	FALSE	TRUE	FALSE	FALSE	none	ReMap	none	none	-	-
ADNP	CTB	0	D	FALSE	TRUE	FALSE	FALSE	none	ReMap	none	none	-	-
ADNP	CTCF	0	E	FALSE	FALSE	FALSE	TRUE	none	none	none	ARACNe-GTEx	-	-
ADNP	CTD	0	D	FALSE	TRUE	FALSE	FALSE	none	ReMap	none	none	-	-
ADNP	CTNNB1	0	E	FALSE	FALSE	FALSE	TRUE	none	none	none	ARACNe-GTEx	-	-
ADNP	CTR9	0	E	FALSE	FALSE	FALSE	TRUE	none	none	none	ARACNe-GTEx	-	-
ADNP	CTRC	0	D	FALSE	TRUE	FALSE	FALSE	none	ReMap	none	none	-	-
ADNP	CUL5	0	E	FALSE	FALSE	FALSE	TRUE	none	none	none	ARACNe-GTEx	-	-
ADNP	CUX1	0	D	FALSE	TRUE	FALSE	FALSE	none	ReMap	none	none	-	-
ADNP	CUX2	0	D	FALSE	TRUE	FALSE	FALSE	none	ReMap	none	none	-	-
ADNP	CWC22	0	E	FALSE	FALSE	FALSE	TRUE	none	none	none	ARACNe-GTEx	-	-
ADNP	DAPK2	0	D	FALSE	TRUE	FALSE	FALSE	none	ReMap	none	none	-	-
ADNP	DBR1	0	E	FALSE	FALSE	FALSE	TRUE	none	none	none	ARACNe-GTEx	-	-
ADNP	DCAF10	0	E	FALSE	FALSE	FALSE	TRUE	none	none	none	ARACNe-GTEx	-	-
ADNP	DCAF17	0	E	FALSE	FALSE	FALSE	TRUE	none	none	none	ARACNe-GTEx	-	-
ADNP	DCAF7	0	E	FALSE	FALSE	FALSE	TRUE	none	none	none	ARACNe-GTEx	-	-
ADNP	DCLRE1A	0	E	FALSE	FALSE	FALSE	TRUE	none	none	none	ARACNe-GTEx	-	-
ADNP	DCP1A	0	E	FALSE	FALSE	FALSE	TRUE	none	none	none	ARACNe-GTEx	-	-
ADNP	DCTN4	0	E	FALSE	FALSE	FALSE	TRUE	none	none	none	ARACNe-GTEx	-	-
ADNP	DCUN1D1	0	E	FALSE	FALSE	FALSE	TRUE	none	none	none	ARACNe-GTEx	-	-
ADNP	DDX20	0	E	FALSE	FALSE	FALSE	TRUE	none	none	none	ARACNe-GTEx	-	-
ADNP	DDX6	0	E	FALSE	FALSE	FALSE	TRUE	none	none	none	ARACNe-GTEx	-	-
ADNP	DENND1A	0	D	FALSE	TRUE	FALSE	FALSE	none	ReMap	none	none	-	-
ADNP	DENR	0	E	FALSE	FALSE	FALSE	TRUE	none	none	none	ARACNe-GTEx	-	-
ADNP	DEPDC5	0	D	FALSE	TRUE	FALSE	FALSE	none	ReMap	none	none	-	-
ADNP	DHX57	0	E	FALSE	FALSE	FALSE	TRUE	none	none	none	ARACNe-GTEx	-	-
ADNP	DIDO1	0	E	FALSE	FALSE	FALSE	TRUE	none	none	none	ARACNe-GTEx	-	-
ADNP	DIEXF	0	E	FALSE	FALSE	FALSE	TRUE	none	none	none	ARACNe-GTEx	-	-
ADNP	DIS3	0	E	FALSE	FALSE	FALSE	TRUE	none	none	none	ARACNe-GTEx	-	-
ADNP	DISP3	0	D	FALSE	TRUE	FALSE	FALSE	none	ReMap	none	none	-	-
ADNP	DLG1	0	E	FALSE	FALSE	FALSE	TRUE	none	none	none	ARACNe-GTEx	-	-
ADNP	DLGAP4	0	D	FALSE	TRUE	FALSE	FALSE	none	ReMap	none	none	-	-
ADNP	DNAJB12	0	D	FALSE	TRUE	FALSE	FALSE	none	ReMap	none	none	-	-
ADNP	DNAJC16	0	E	FALSE	FALSE	FALSE	TRUE	none	none	none	ARACNe-GTEx	-	-
ADNP	DNAJC6	0	D	FALSE	TRUE	FALSE	FALSE	none	ReMap	none	none	-	-
ADNP	DNAJC9	0	E	FALSE	FALSE	FALSE	TRUE	none	none	none	ARACNe-GTEx	-	-
ADNP	DNM1	0	D	FALSE	TRUE	FALSE	FALSE	none	ReMap	none	none	-	-
ADNP	DNM2	0	D	FALSE	TRUE	FALSE	FALSE	none	ReMap	none	none	-	-
ADNP	DOCK6	0	D	FALSE	TRUE	FALSE	FALSE	none	ReMap	none	none	-	-
ADNP	DPP3	0	D	FALSE	TRUE	FALSE	FALSE	none	ReMap	none	none	-	-
ADNP	DSTYK	0	E	FALSE	FALSE	FALSE	TRUE	none	none	none	ARACNe-GTEx	-	-
ADNP	DYRK1A	0	C	FALSE	TRUE	FALSE	TRUE	none	ReMap	none	ARACNe-GTEx	-	-
ADNP	E2F2	0	D	FALSE	TRUE	FALSE	FALSE	none	ReMap	none	none	-	-
ADNP	EBI3	0	D	FALSE	TRUE	FALSE	FALSE	none	ReMap	none	none	-	-
ADNP	ECE1	0	D	FALSE	TRUE	FALSE	FALSE	none	ReMap	none	none	-	-
ADNP	EDRF1	0	E	FALSE	FALSE	FALSE	TRUE	none	none	none	ARACNe-GTEx	-	-
ADNP	EED	0	E	FALSE	FALSE	FALSE	TRUE	none	none	none	ARACNe-GTEx	-	-
ADNP	EEF2K	0	D	FALSE	TRUE	FALSE	FALSE	none	ReMap	none	none	-	-
ADNP	EHF	0	D	FALSE	TRUE	FALSE	FALSE	none	ReMap	none	none	-	-
ADNP	EIF2AK2	0	E	FALSE	FALSE	FALSE	TRUE	none	none	none	ARACNe-GTEx	-	-
ADNP	EIF2B1	0	E	FALSE	FALSE	FALSE	TRUE	none	none	none	ARACNe-GTEx	-	-
ADNP	EIF4E	0	D	FALSE	TRUE	FALSE	FALSE	none	ReMap	none	none	-	-
ADNP	EIF4G3	0	D	FALSE	TRUE	FALSE	FALSE	none	ReMap	none	none	-	-
ADNP	ELFN1	0	D	FALSE	TRUE	FALSE	FALSE	none	ReMap	none	none	-	-
ADNP	ELL2	0	D	FALSE	TRUE	FALSE	FALSE	none	ReMap	none	none	-	-
ADNP	ELMOD2	0	E	FALSE	FALSE	FALSE	TRUE	none	none	none	ARACNe-GTEx	-	-
ADNP	ENG	0	D	FALSE	TRUE	FALSE	FALSE	none	ReMap	none	none	-	-
ADNP	EP300	0	E	FALSE	FALSE	FALSE	TRUE	none	none	none	ARACNe-GTEx	-	-
ADNP	EPB41	0	D	FALSE	TRUE	FALSE	FALSE	none	ReMap	none	none	-	-
ADNP	EPB41L1	0	D	FALSE	TRUE	FALSE	FALSE	none	ReMap	none	none	-	-
ADNP	EPC1	0	E	FALSE	FALSE	FALSE	TRUE	none	none	none	ARACNe-GTEx	-	-
ADNP	EPC2	0	E	FALSE	FALSE	FALSE	TRUE	none	none	none	ARACNe-GTEx	-	-
ADNP	EPG5	0	E	FALSE	FALSE	FALSE	TRUE	none	none	none	ARACNe-GTEx	-	-
ADNP	EPHA2	0	D	FALSE	TRUE	FALSE	FALSE	none	ReMap	none	none	-	-
ADNP	EPHB4	0	D	FALSE	TRUE	FALSE	FALSE	none	ReMap	none	none	-	-
ADNP	ERBIN	0	E	FALSE	FALSE	FALSE	TRUE	none	none	none	ARACNe-GTEx	-	-
ADNP	ERCC1	0	D	FALSE	TRUE	FALSE	FALSE	none	ReMap	none	none	-	-
ADNP	ERCC2	0	D	FALSE	TRUE	FALSE	FALSE	none	ReMap	none	none	-	-
ADNP	ERCC4	0	E	FALSE	FALSE	FALSE	TRUE	none	none	none	ARACNe-GTEx	-	-
ADNP	ERN2	0	D	FALSE	TRUE	FALSE	FALSE	none	ReMap	none	none	-	-
ADNP	ESCO1	0	E	FALSE	FALSE	FALSE	TRUE	none	none	none	ARACNe-GTEx	-	-
ADNP	ESF1	0	E	FALSE	FALSE	FALSE	TRUE	none	none	none	ARACNe-GTEx	-	-
ADNP	EXD2	0	E	FALSE	FALSE	FALSE	TRUE	none	none	none	ARACNe-GTEx	-	-
ADNP	EXOC2	0	E	FALSE	FALSE	FALSE	TRUE	none	none	none	ARACNe-GTEx	-	-
ADNP	EXOC4	0	E	FALSE	FALSE	FALSE	TRUE	none	none	none	ARACNe-GTEx	-	-
ADNP	EXOC8	0	E	FALSE	FALSE	FALSE	TRUE	none	none	none	ARACNe-GTEx	-	-
ADNP	EYA3	0	E	FALSE	FALSE	FALSE	TRUE	none	none	none	ARACNe-GTEx	-	-
ADNP	FAF1	0	D	FALSE	TRUE	FALSE	FALSE	none	ReMap	none	none	-	-
ADNP	FAF2	0	E	FALSE	FALSE	FALSE	TRUE	none	none	none	ARACNe-GTEx	-	-
ADNP	FAM120B	0	E	FALSE	FALSE	FALSE	TRUE	none	none	none	ARACNe-GTEx	-	-
ADNP	FAM120C	0	E	FALSE	FALSE	FALSE	TRUE	none	none	none	ARACNe-GTEx	-	-
ADNP	FAM129B	0	D	FALSE	TRUE	FALSE	FALSE	none	ReMap	none	none	-	-
ADNP	FAM129C	0	D	FALSE	TRUE	FALSE	FALSE	none	ReMap	none	none	-	-
ADNP	FAM13B	0	E	FALSE	FALSE	FALSE	TRUE	none	none	none	ARACNe-GTEx	-	-
ADNP	FAM175B	0	E	FALSE	FALSE	FALSE	TRUE	none	none	none	ARACNe-GTEx	-	-
ADNP	FAM179B	0	E	FALSE	FALSE	FALSE	TRUE	none	none	none	ARACNe-GTEx	-	-
ADNP	FAM208A	0	E	FALSE	FALSE	FALSE	TRUE	none	none	none	ARACNe-GTEx	-	-
ADNP	FAM21C	0	E	FALSE	FALSE	FALSE	TRUE	none	none	none	ARACNe-GTEx	-	-
ADNP	FAM222A	0	D	FALSE	TRUE	FALSE	FALSE	none	ReMap	none	none	-	-
ADNP	FAM46B	0	D	FALSE	TRUE	FALSE	FALSE	none	ReMap	none	none	-	-
ADNP	FAM49B	0	D	FALSE	TRUE	FALSE	FALSE	none	ReMap	none	none	-	-
ADNP	FAN1	0	E	FALSE	FALSE	FALSE	TRUE	none	none	none	ARACNe-GTEx	-	-
ADNP	FBN3	0	D	FALSE	TRUE	FALSE	FALSE	none	ReMap	none	none	-	-
ADNP	FBXL4	0	E	FALSE	FALSE	FALSE	TRUE	none	none	none	ARACNe-GTEx	-	-
ADNP	FBXO28	0	E	FALSE	FALSE	FALSE	TRUE	none	none	none	ARACNe-GTEx	-	-
ADNP	FBXW11	0	D	FALSE	TRUE	FALSE	FALSE	none	ReMap	none	none	-	-
ADNP	FCHO1	0	D	FALSE	TRUE	FALSE	FALSE	none	ReMap	none	none	-	-
ADNP	FEM1B	0	E	FALSE	FALSE	FALSE	TRUE	none	none	none	ARACNe-GTEx	-	-
ADNP	FHAD1	0	D	FALSE	TRUE	FALSE	FALSE	none	ReMap	none	none	-	-
ADNP	FIBCD1	0	D	FALSE	TRUE	FALSE	FALSE	none	ReMap	none	none	-	-
ADNP	FIGNL1	0	E	FALSE	FALSE	FALSE	TRUE	none	none	none	ARACNe-GTEx	-	-
ADNP	FKBP15	0	E	FALSE	FALSE	FALSE	TRUE	none	none	none	ARACNe-GTEx	-	-
ADNP	FLNB	0	D	FALSE	TRUE	FALSE	FALSE	none	ReMap	none	none	-	-
ADNP	FNIP2	0	D	FALSE	TRUE	FALSE	FALSE	none	ReMap	none	none	-	-
ADNP	FOXRED2	0	E	FALSE	FALSE	FALSE	TRUE	none	none	none	ARACNe-GTEx	-	-
ADNP	FRS2	0	E	FALSE	FALSE	FALSE	TRUE	none	none	none	ARACNe-GTEx	-	-
ADNP	FXN	0	D	FALSE	TRUE	FALSE	FALSE	none	ReMap	none	none	-	-
ADNP	GABBR2	0	D	FALSE	TRUE	FALSE	FALSE	none	ReMap	none	none	-	-
ADNP	GABPA	0	E	FALSE	FALSE	FALSE	TRUE	none	none	none	ARACNe-GTEx	-	-
ADNP	GADD45B	0	D	FALSE	TRUE	FALSE	FALSE	none	ReMap	none	none	-	-
ADNP	GDF15	0	D	FALSE	TRUE	FALSE	FALSE	none	ReMap	none	none	-	-
ADNP	GDPD5	0	D	FALSE	TRUE	FALSE	FALSE	none	ReMap	none	none	-	-
ADNP	GEMIN5	0	E	FALSE	FALSE	FALSE	TRUE	none	none	none	ARACNe-GTEx	-	-
ADNP	GFI1B	0	D	FALSE	TRUE	FALSE	FALSE	none	ReMap	none	none	-	-
ADNP	GIGYF2	0	E	FALSE	FALSE	FALSE	TRUE	none	none	none	ARACNe-GTEx	-	-
ADNP	GLE1	0	E	FALSE	FALSE	FALSE	TRUE	none	none	none	ARACNe-GTEx	-	-
ADNP	GLTSCR1L	0	E	FALSE	FALSE	FALSE	TRUE	none	none	none	ARACNe-GTEx	-	-
ADNP	GMEB1	0	E	FALSE	FALSE	FALSE	TRUE	none	none	none	ARACNe-GTEx	-	-
ADNP	GMPR	0	D	FALSE	TRUE	FALSE	FALSE	none	ReMap	none	none	-	-
ADNP	GNA15	0	D	FALSE	TRUE	FALSE	FALSE	none	ReMap	none	none	-	-
ADNP	GOLGA1	0	E	FALSE	FALSE	FALSE	TRUE	none	none	none	ARACNe-GTEx	-	-
ADNP	GOLGB1	0	E	FALSE	FALSE	FALSE	TRUE	none	none	none	ARACNe-GTEx	-	-
ADNP	GOPC	0	E	FALSE	FALSE	FALSE	TRUE	none	none	none	ARACNe-GTEx	-	-
ADNP	GOSR1	0	E	FALSE	FALSE	FALSE	TRUE	none	none	none	ARACNe-GTEx	-	-
ADNP	GPBP1	0	E	FALSE	FALSE	FALSE	TRUE	none	none	none	ARACNe-GTEx	-	-
ADNP	GPBP1L1	0	E	FALSE	FALSE	FALSE	TRUE	none	none	none	ARACNe-GTEx	-	-
ADNP	GPR160	0	D	FALSE	TRUE	FALSE	FALSE	none	ReMap	none	none	-	-
ADNP	GPR180	0	E	FALSE	FALSE	FALSE	TRUE	none	none	none	ARACNe-GTEx	-	-
ADNP	GPR89P	0	D	FALSE	TRUE	FALSE	FALSE	none	ReMap	none	none	-	-
ADNP	GRIFIN	0	D	FALSE	TRUE	FALSE	FALSE	none	ReMap	none	none	-	-
ADNP	GRIP2	0	D	FALSE	TRUE	FALSE	FALSE	none	ReMap	none	none	-	-
ADNP	GRM4	0	D	FALSE	TRUE	FALSE	FALSE	none	ReMap	none	none	-	-
ADNP	GSE1	0	D	FALSE	TRUE	FALSE	FALSE	none	ReMap	none	none	-	-
ADNP	GSN	0	D	FALSE	TRUE	FALSE	FALSE	none	ReMap	none	none	-	-
ADNP	GTDC1	0	D	FALSE	TRUE	FALSE	FALSE	none	ReMap	none	none	-	-
ADNP	GTF2H3	0	E	FALSE	FALSE	FALSE	TRUE	none	none	none	ARACNe-GTEx	-	-
ADNP	GTF2IRD1	0	D	FALSE	TRUE	FALSE	FALSE	none	ReMap	none	none	-	-
ADNP	GTF3C3	0	E	FALSE	FALSE	FALSE	TRUE	none	none	none	ARACNe-GTEx	-	-
ADNP	GTF3C4	0	E	FALSE	FALSE	FALSE	TRUE	none	none	none	ARACNe-GTEx	-	-
ADNP	GXYLT1	0	E	FALSE	FALSE	FALSE	TRUE	none	none	none	ARACNe-GTEx	-	-
ADNP	HACD2	0	E	FALSE	FALSE	FALSE	TRUE	none	none	none	ARACNe-GTEx	-	-
ADNP	HAUS3	0	E	FALSE	FALSE	FALSE	TRUE	none	none	none	ARACNe-GTEx	-	-
ADNP	HAUS6	0	E	FALSE	FALSE	FALSE	TRUE	none	none	none	ARACNe-GTEx	-	-
ADNP	HBS1L	0	D	FALSE	TRUE	FALSE	FALSE	none	ReMap	none	none	-	-
ADNP	HEATR6	0	E	FALSE	FALSE	FALSE	TRUE	none	none	none	ARACNe-GTEx	-	-
ADNP	HECTD1	0	E	FALSE	FALSE	FALSE	TRUE	none	none	none	ARACNe-GTEx	-	-
ADNP	HELQ	0	E	FALSE	FALSE	FALSE	TRUE	none	none	none	ARACNe-GTEx	-	-
ADNP	HERPUD2	0	E	FALSE	FALSE	FALSE	TRUE	none	none	none	ARACNe-GTEx	-	-
ADNP	HFE2	0	D	FALSE	TRUE	FALSE	FALSE	none	ReMap	none	none	-	-
ADNP	HIP1	0	D	FALSE	TRUE	FALSE	FALSE	none	ReMap	none	none	-	-
ADNP	HIST1H3PS1	0	D	FALSE	TRUE	FALSE	FALSE	none	ReMap	none	none	-	-
ADNP	HLTF	0	E	FALSE	FALSE	FALSE	TRUE	none	none	none	ARACNe-GTEx	-	-
ADNP	HMG20A	0	E	FALSE	FALSE	FALSE	TRUE	none	none	none	ARACNe-GTEx	-	-
ADNP	HMGA1P3	0	D	FALSE	TRUE	FALSE	FALSE	none	ReMap	none	none	-	-
ADNP	HMGB1P1	0	D	FALSE	TRUE	FALSE	FALSE	none	ReMap	none	none	-	-
ADNP	HMGB3P32	0	D	FALSE	TRUE	FALSE	FALSE	none	ReMap	none	none	-	-
ADNP	HMGN2P13	0	D	FALSE	TRUE	FALSE	FALSE	none	ReMap	none	none	-	-
ADNP	HMGN2P25	0	D	FALSE	TRUE	FALSE	FALSE	none	ReMap	none	none	-	-
ADNP	HMGN2P47	0	D	FALSE	TRUE	FALSE	FALSE	none	ReMap	none	none	-	-
ADNP	HMGN4	0	D	FALSE	TRUE	FALSE	FALSE	none	ReMap	none	none	-	-
ADNP	HNF1A	0	D	FALSE	TRUE	FALSE	FALSE	none	ReMap	none	none	-	-
ADNP	HNRNPA1P1	0	D	FALSE	TRUE	FALSE	FALSE	none	ReMap	none	none	-	-
ADNP	HSD17B12	0	D	FALSE	TRUE	FALSE	FALSE	none	ReMap	none	none	-	-
ADNP	HTR1D	0	D	FALSE	TRUE	FALSE	FALSE	none	ReMap	none	none	-	-
ADNP	ICE2	0	E	FALSE	FALSE	FALSE	TRUE	none	none	none	ARACNe-GTEx	-	-
ADNP	ID1	0	D	FALSE	TRUE	FALSE	FALSE	none	ReMap	none	none	-	-
ADNP	IFFO2	0	D	FALSE	TRUE	FALSE	FALSE	none	ReMap	none	none	-	-
ADNP	IGF2BP2	0	D	FALSE	TRUE	FALSE	FALSE	none	ReMap	none	none	-	-
ADNP	IKBKAP	0	E	FALSE	FALSE	FALSE	TRUE	none	none	none	ARACNe-GTEx	-	-
ADNP	IL12RB1	0	D	FALSE	TRUE	FALSE	FALSE	none	ReMap	none	none	-	-
ADNP	IL21R	0	D	FALSE	TRUE	FALSE	FALSE	none	ReMap	none	none	-	-
ADNP	INIP	0	E	FALSE	FALSE	FALSE	TRUE	none	none	none	ARACNe-GTEx	-	-
ADNP	INPP5B	0	D	FALSE	TRUE	FALSE	FALSE	none	ReMap	none	none	-	-
ADNP	INPP5D	0	D	FALSE	TRUE	FALSE	FALSE	none	ReMap	none	none	-	-
ADNP	INSR	0	D	FALSE	TRUE	FALSE	FALSE	none	ReMap	none	none	-	-
ADNP	INTS2	0	E	FALSE	FALSE	FALSE	TRUE	none	none	none	ARACNe-GTEx	-	-
ADNP	INTS8	0	E	FALSE	FALSE	FALSE	TRUE	none	none	none	ARACNe-GTEx	-	-
ADNP	IPO8	0	E	FALSE	FALSE	FALSE	TRUE	none	none	none	ARACNe-GTEx	-	-
ADNP	IPO9	0	E	FALSE	FALSE	FALSE	TRUE	none	none	none	ARACNe-GTEx	-	-
ADNP	IQSEC1	0	D	FALSE	TRUE	FALSE	FALSE	none	ReMap	none	none	-	-
ADNP	IREB2	0	E	FALSE	FALSE	FALSE	TRUE	none	none	none	ARACNe-GTEx	-	-
ADNP	IRF2BP1	0	D	FALSE	TRUE	FALSE	FALSE	none	ReMap	none	none	-	-
ADNP	ISPD	0	D	FALSE	TRUE	FALSE	FALSE	none	ReMap	none	none	-	-
ADNP	ITPR1	0	D	FALSE	TRUE	FALSE	FALSE	none	ReMap	none	none	-	-
ADNP	JAK3	0	D	FALSE	TRUE	FALSE	FALSE	none	ReMap	none	none	-	-
ADNP	JKAMP	0	E	FALSE	FALSE	FALSE	TRUE	none	none	none	ARACNe-GTEx	-	-
ADNP	KANSL1	0	E	FALSE	FALSE	FALSE	TRUE	none	none	none	ARACNe-GTEx	-	-
ADNP	KANSL2	0	E	FALSE	FALSE	FALSE	TRUE	none	none	none	ARACNe-GTEx	-	-
ADNP	KAT6B	0	E	FALSE	FALSE	FALSE	TRUE	none	none	none	ARACNe-GTEx	-	-
ADNP	KAT7	0	E	FALSE	FALSE	FALSE	TRUE	none	none	none	ARACNe-GTEx	-	-
ADNP	KAZN	0	D	FALSE	TRUE	FALSE	FALSE	none	ReMap	none	none	-	-
ADNP	KBTBD7	0	E	FALSE	FALSE	FALSE	TRUE	none	none	none	ARACNe-GTEx	-	-
ADNP	KCNK1	0	D	FALSE	TRUE	FALSE	FALSE	none	ReMap	none	none	-	-
ADNP	KCNK3	0	D	FALSE	TRUE	FALSE	FALSE	none	ReMap	none	none	-	-
ADNP	KCNN3	0	D	FALSE	TRUE	FALSE	FALSE	none	ReMap	none	none	-	-
ADNP	KDM1A	0	E	FALSE	FALSE	FALSE	TRUE	none	none	none	ARACNe-GTEx	-	-
ADNP	KDM2A	0	E	FALSE	FALSE	FALSE	TRUE	none	none	none	ARACNe-GTEx	-	-
ADNP	KDM3B	0	E	FALSE	FALSE	FALSE	TRUE	none	none	none	ARACNe-GTEx	-	-
ADNP	KDM4A	0	E	FALSE	FALSE	FALSE	TRUE	none	none	none	ARACNe-GTEx	-	-
ADNP	KDM5A	0	E	FALSE	FALSE	FALSE	TRUE	none	none	none	ARACNe-GTEx	-	-
ADNP	KIAA0196	0	E	FALSE	FALSE	FALSE	TRUE	none	none	none	ARACNe-GTEx	-	-
ADNP	KIAA0232	0	D	FALSE	TRUE	FALSE	FALSE	none	ReMap	none	none	-	-
ADNP	KIAA0586	0	E	FALSE	FALSE	FALSE	TRUE	none	none	none	ARACNe-GTEx	-	-
ADNP	KIAA1429	0	E	FALSE	FALSE	FALSE	TRUE	none	none	none	ARACNe-GTEx	-	-
ADNP	KIAA1551	0	E	FALSE	FALSE	FALSE	TRUE	none	none	none	ARACNe-GTEx	-	-
ADNP	KIAA1671	0	E	FALSE	FALSE	FALSE	TRUE	none	none	none	ARACNe-GTEx	-	-
ADNP	KIAA2026	0	E	FALSE	FALSE	FALSE	TRUE	none	none	none	ARACNe-GTEx	-	-
ADNP	KIF13A	0	D	FALSE	TRUE	FALSE	FALSE	none	ReMap	none	none	-	-
ADNP	KLHL12	0	E	FALSE	FALSE	FALSE	TRUE	none	none	none	ARACNe-GTEx	-	-
ADNP	KLHL9	0	E	FALSE	FALSE	FALSE	TRUE	none	none	none	ARACNe-GTEx	-	-
ADNP	KMT2C	0	E	FALSE	FALSE	FALSE	TRUE	none	none	none	ARACNe-GTEx	-	-
ADNP	KMT5B	0	E	FALSE	FALSE	FALSE	TRUE	none	none	none	ARACNe-GTEx	-	-
ADNP	KRIT1	0	E	FALSE	FALSE	FALSE	TRUE	none	none	none	ARACNe-GTEx	-	-
ADNP	KRR1	0	E	FALSE	FALSE	FALSE	TRUE	none	none	none	ARACNe-GTEx	-	-
ADNP	KSR1	0	D	FALSE	TRUE	FALSE	FALSE	none	ReMap	none	none	-	-
ADNP	LAMC3	0	D	FALSE	TRUE	FALSE	FALSE	none	ReMap	none	none	-	-
ADNP	LAPTM5	0	D	FALSE	TRUE	FALSE	FALSE	none	ReMap	none	none	-	-
ADNP	LASP1	0	D	FALSE	TRUE	FALSE	FALSE	none	ReMap	none	none	-	-
ADNP	LATS1	0	E	FALSE	FALSE	FALSE	TRUE	none	none	none	ARACNe-GTEx	-	-
ADNP	LDLRAP1	0	D	FALSE	TRUE	FALSE	FALSE	none	ReMap	none	none	-	-
ADNP	LGR4	0	D	FALSE	TRUE	FALSE	FALSE	none	ReMap	none	none	-	-
ADNP	LHPP	0	D	FALSE	TRUE	FALSE	FALSE	none	ReMap	none	none	-	-
ADNP	LINC00324	0	D	FALSE	TRUE	FALSE	FALSE	none	ReMap	none	none	-	-
ADNP	LINC00534	0	D	FALSE	TRUE	FALSE	FALSE	none	ReMap	none	none	-	-
ADNP	LINC00870	0	D	FALSE	TRUE	FALSE	FALSE	none	ReMap	none	none	-	-
ADNP	LINC00877	0	D	FALSE	TRUE	FALSE	FALSE	none	ReMap	none	none	-	-
ADNP	LINC00963	0	D	FALSE	TRUE	FALSE	FALSE	none	ReMap	none	none	-	-
ADNP	LINC01012	0	D	FALSE	TRUE	FALSE	FALSE	none	ReMap	none	none	-	-
ADNP	LINC01234	0	D	FALSE	TRUE	FALSE	FALSE	none	ReMap	none	none	-	-
ADNP	LINC01267	0	D	FALSE	TRUE	FALSE	FALSE	none	ReMap	none	none	-	-
ADNP	LINC01270	0	D	FALSE	TRUE	FALSE	FALSE	none	ReMap	none	none	-	-
ADNP	LINC01315	0	D	FALSE	TRUE	FALSE	FALSE	none	ReMap	none	none	-	-
ADNP	LINC01412	0	D	FALSE	TRUE	FALSE	FALSE	none	ReMap	none	none	-	-
ADNP	LINC01485	0	D	FALSE	TRUE	FALSE	FALSE	none	ReMap	none	none	-	-
ADNP	LINC01503	0	D	FALSE	TRUE	FALSE	FALSE	none	ReMap	none	none	-	-
ADNP	LINC01556	0	D	FALSE	TRUE	FALSE	FALSE	none	ReMap	none	none	-	-
ADNP	LINC01623	0	D	FALSE	TRUE	FALSE	FALSE	none	ReMap	none	none	-	-
ADNP	LINC01685	0	D	FALSE	TRUE	FALSE	FALSE	none	ReMap	none	none	-	-
ADNP	LINC01756	0	D	FALSE	TRUE	FALSE	FALSE	none	ReMap	none	none	-	-
ADNP	LINC01942	0	D	FALSE	TRUE	FALSE	FALSE	none	ReMap	none	none	-	-
ADNP	LINC01962	0	D	FALSE	TRUE	FALSE	FALSE	none	ReMap	none	none	-	-
ADNP	LINC01992	0	D	FALSE	TRUE	FALSE	FALSE	none	ReMap	none	none	-	-
ADNP	LINGO1	0	D	FALSE	TRUE	FALSE	FALSE	none	ReMap	none	none	-	-
ADNP	LIPC	0	D	FALSE	TRUE	FALSE	FALSE	none	ReMap	none	none	-	-
ADNP	LITAF	0	D	FALSE	TRUE	FALSE	FALSE	none	ReMap	none	none	-	-
ADNP	LLNLR	0	D	FALSE	TRUE	FALSE	FALSE	none	ReMap	none	none	-	-
ADNP	LMO2	0	D	FALSE	TRUE	FALSE	FALSE	none	ReMap	none	none	-	-
ADNP	LNPEP	0	E	FALSE	FALSE	FALSE	TRUE	none	none	none	ARACNe-GTEx	-	-
ADNP	LRIF1	0	E	FALSE	FALSE	FALSE	TRUE	none	none	none	ARACNe-GTEx	-	-
ADNP	LRRC58	0	E	FALSE	FALSE	FALSE	TRUE	none	none	none	ARACNe-GTEx	-	-
ADNP	LUC7L2	0	D	FALSE	TRUE	FALSE	FALSE	none	ReMap	none	none	-	-
ADNP	MAGI1	0	D	FALSE	TRUE	FALSE	FALSE	none	ReMap	none	none	-	-
ADNP	MAP2K4	0	E	FALSE	FALSE	FALSE	TRUE	none	none	none	ARACNe-GTEx	-	-
ADNP	MAP3K1	0	E	FALSE	FALSE	FALSE	TRUE	none	none	none	ARACNe-GTEx	-	-
ADNP	MAP3K4	0	E	FALSE	FALSE	FALSE	TRUE	none	none	none	ARACNe-GTEx	-	-
ADNP	MAP3K7	0	D	FALSE	TRUE	FALSE	FALSE	none	ReMap	none	none	-	-
ADNP	MAPRE2	0	D	FALSE	TRUE	FALSE	FALSE	none	ReMap	none	none	-	-
ADNP	MARK4	0	D	FALSE	TRUE	FALSE	FALSE	none	ReMap	none	none	-	-
ADNP	MAST3	0	D	FALSE	TRUE	FALSE	FALSE	none	ReMap	none	none	-	-
ADNP	MAT2B	0	E	FALSE	FALSE	FALSE	TRUE	none	none	none	ARACNe-GTEx	-	-
ADNP	MATK	0	D	FALSE	TRUE	FALSE	FALSE	none	ReMap	none	none	-	-
ADNP	MB	0	D	FALSE	TRUE	FALSE	FALSE	none	ReMap	none	none	-	-
ADNP	MBLAC2	0	E	FALSE	FALSE	FALSE	TRUE	none	none	none	ARACNe-GTEx	-	-
ADNP	MBNL1	0	D	FALSE	TRUE	FALSE	FALSE	none	ReMap	none	none	-	-
ADNP	MDM4	0	D	FALSE	TRUE	FALSE	FALSE	none	ReMap	none	none	-	-
ADNP	MDN1	0	E	FALSE	FALSE	FALSE	TRUE	none	none	none	ARACNe-GTEx	-	-
ADNP	MDS2	0	D	FALSE	TRUE	FALSE	FALSE	none	ReMap	none	none	-	-
ADNP	MED1	0	E	FALSE	FALSE	FALSE	TRUE	none	none	none	ARACNe-GTEx	-	-
ADNP	MED17	0	E	FALSE	FALSE	FALSE	TRUE	none	none	none	ARACNe-GTEx	-	-
ADNP	MED18	0	D	FALSE	TRUE	FALSE	FALSE	none	ReMap	none	none	-	-
ADNP	MED23	0	E	FALSE	FALSE	FALSE	TRUE	none	none	none	ARACNe-GTEx	-	-
ADNP	METAZOA_SRP.104	0	D	FALSE	TRUE	FALSE	FALSE	none	ReMap	none	none	-	-
ADNP	METTL14	0	E	FALSE	FALSE	FALSE	TRUE	none	none	none	ARACNe-GTEx	-	-
ADNP	METTL16	0	E	FALSE	FALSE	FALSE	TRUE	none	none	none	ARACNe-GTEx	-	-
ADNP	METTL4	0	E	FALSE	FALSE	FALSE	TRUE	none	none	none	ARACNe-GTEx	-	-
ADNP	METTL6	0	E	FALSE	FALSE	FALSE	TRUE	none	none	none	ARACNe-GTEx	-	-
ADNP	MFAP1	0	E	FALSE	FALSE	FALSE	TRUE	none	none	none	ARACNe-GTEx	-	-
ADNP	MGA	0	E	FALSE	FALSE	FALSE	TRUE	none	none	none	ARACNe-GTEx	-	-
ADNP	MIA3	0	E	FALSE	FALSE	FALSE	TRUE	none	none	none	ARACNe-GTEx	-	-
ADNP	MICAL2	0	D	FALSE	TRUE	FALSE	FALSE	none	ReMap	none	none	-	-
ADNP	MIER1	0	D	FALSE	TRUE	FALSE	FALSE	none	ReMap	none	none	-	-
ADNP	MIOS	0	E	FALSE	FALSE	FALSE	TRUE	none	none	none	ARACNe-GTEx	-	-
ADNP	MIR1205	0	D	FALSE	TRUE	FALSE	FALSE	none	ReMap	none	none	-	-
ADNP	MIR1303	0	D	FALSE	TRUE	FALSE	FALSE	none	ReMap	none	none	-	-
ADNP	MIR145	0	D	FALSE	TRUE	FALSE	FALSE	none	ReMap	none	none	-	-
ADNP	MIR3143	0	D	FALSE	TRUE	FALSE	FALSE	none	ReMap	none	none	-	-
ADNP	MIR3194	0	D	FALSE	TRUE	FALSE	FALSE	none	ReMap	none	none	-	-
ADNP	MIR3681HG	0	D	FALSE	TRUE	FALSE	FALSE	none	ReMap	none	none	-	-
ADNP	MIR3922	0	D	FALSE	TRUE	FALSE	FALSE	none	ReMap	none	none	-	-
ADNP	MIR4418	0	D	FALSE	TRUE	FALSE	FALSE	none	ReMap	none	none	-	-
ADNP	MIR4425	0	D	FALSE	TRUE	FALSE	FALSE	none	ReMap	none	none	-	-
ADNP	MIR4472	0	D	FALSE	TRUE	FALSE	FALSE	none	ReMap	none	none	-	-
ADNP	MIR5093	0	D	FALSE	TRUE	FALSE	FALSE	none	ReMap	none	none	-	-
ADNP	MIR5189	0	D	FALSE	TRUE	FALSE	FALSE	none	ReMap	none	none	-	-
ADNP	MIR7854	0	D	FALSE	TRUE	FALSE	FALSE	none	ReMap	none	none	-	-
ADNP	MIS12	0	E	FALSE	FALSE	FALSE	TRUE	none	none	none	ARACNe-GTEx	-	-
ADNP	MKRN2	0	E	FALSE	FALSE	FALSE	TRUE	none	none	none	ARACNe-GTEx	-	-
ADNP	MLH3	0	E	FALSE	FALSE	FALSE	TRUE	none	none	none	ARACNe-GTEx	-	-
ADNP	MLLT10	0	E	FALSE	FALSE	FALSE	TRUE	none	none	none	ARACNe-GTEx	-	-
ADNP	MLXIPL	0	D	FALSE	TRUE	FALSE	FALSE	none	ReMap	none	none	-	-
ADNP	MN1	0	D	FALSE	TRUE	FALSE	FALSE	none	ReMap	none	none	-	-
ADNP	MOB1A	0	E	FALSE	FALSE	FALSE	TRUE	none	none	none	ARACNe-GTEx	-	-
ADNP	MORC2	0	E	FALSE	FALSE	FALSE	TRUE	none	none	none	ARACNe-GTEx	-	-
ADNP	MORC3	0	E	FALSE	FALSE	FALSE	TRUE	none	none	none	ARACNe-GTEx	-	-
ADNP	MPP5	0	E	FALSE	FALSE	FALSE	TRUE	none	none	none	ARACNe-GTEx	-	-
ADNP	MRC2	0	D	FALSE	TRUE	FALSE	FALSE	none	ReMap	none	none	-	-
ADNP	MRFAP1L1	0	E	FALSE	FALSE	FALSE	TRUE	none	none	none	ARACNe-GTEx	-	-
ADNP	MRPS22	0	D	FALSE	TRUE	FALSE	FALSE	none	ReMap	none	none	-	-
ADNP	MRPS27	0	E	FALSE	FALSE	FALSE	TRUE	none	none	none	ARACNe-GTEx	-	-
ADNP	MSH6	0	E	FALSE	FALSE	FALSE	TRUE	none	none	none	ARACNe-GTEx	-	-
ADNP	MSL2	0	E	FALSE	FALSE	FALSE	TRUE	none	none	none	ARACNe-GTEx	-	-
ADNP	MTERF1	0	E	FALSE	FALSE	FALSE	TRUE	none	none	none	ARACNe-GTEx	-	-
ADNP	MTSS1	0	D	FALSE	TRUE	FALSE	FALSE	none	ReMap	none	none	-	-
ADNP	MTX3	0	E	FALSE	FALSE	FALSE	TRUE	none	none	none	ARACNe-GTEx	-	-
ADNP	MYB	0	D	FALSE	TRUE	FALSE	FALSE	none	ReMap	none	none	-	-
ADNP	MYL10	0	D	FALSE	TRUE	FALSE	FALSE	none	ReMap	none	none	-	-
ADNP	MYNN	0	E	FALSE	FALSE	FALSE	TRUE	none	none	none	ARACNe-GTEx	-	-
ADNP	MYO9A	0	E	FALSE	FALSE	FALSE	TRUE	none	none	none	ARACNe-GTEx	-	-
ADNP	NAA30	0	E	FALSE	FALSE	FALSE	TRUE	none	none	none	ARACNe-GTEx	-	-
ADNP	NAA35	0	E	FALSE	FALSE	FALSE	TRUE	none	none	none	ARACNe-GTEx	-	-
ADNP	NBPF10	0	E	FALSE	FALSE	FALSE	TRUE	none	none	none	ARACNe-GTEx	-	-
ADNP	NCAM2	0	D	FALSE	TRUE	FALSE	FALSE	none	ReMap	none	none	-	-
ADNP	NCBP1	0	E	FALSE	FALSE	FALSE	TRUE	none	none	none	ARACNe-GTEx	-	-
ADNP	NCLN	0	D	FALSE	TRUE	FALSE	FALSE	none	ReMap	none	none	-	-
ADNP	NCOA5	0	E	FALSE	FALSE	FALSE	TRUE	none	none	none	ARACNe-GTEx	-	-
ADNP	NCOA6	0	E	FALSE	FALSE	FALSE	TRUE	none	none	none	ARACNe-GTEx	-	-
ADNP	NCOR1	0	E	FALSE	FALSE	FALSE	TRUE	none	none	none	ARACNe-GTEx	-	-
ADNP	NCOR2	0	D	FALSE	TRUE	FALSE	FALSE	none	ReMap	none	none	-	-
ADNP	NDST1	0	D	FALSE	TRUE	FALSE	FALSE	none	ReMap	none	none	-	-
ADNP	NEBL	0	D	FALSE	TRUE	FALSE	FALSE	none	ReMap	none	none	-	-
ADNP	NEK6	0	D	FALSE	TRUE	FALSE	FALSE	none	ReMap	none	none	-	-
ADNP	NEMF	0	E	FALSE	FALSE	FALSE	TRUE	none	none	none	ARACNe-GTEx	-	-
ADNP	NFAT5	0	D	FALSE	TRUE	FALSE	FALSE	none	ReMap	none	none	-	-
ADNP	NFATC2	0	D	FALSE	TRUE	FALSE	FALSE	none	ReMap	none	none	-	-
ADNP	NFIA	0	D	FALSE	TRUE	FALSE	FALSE	none	ReMap	none	none	-	-
ADNP	NFIC	0	D	FALSE	TRUE	FALSE	FALSE	none	ReMap	none	none	-	-
ADNP	NFRKB	0	E	FALSE	FALSE	FALSE	TRUE	none	none	none	ARACNe-GTEx	-	-
ADNP	NFYA	0	E	FALSE	FALSE	FALSE	TRUE	none	none	none	ARACNe-GTEx	-	-
ADNP	NHLRC2	0	E	FALSE	FALSE	FALSE	TRUE	none	none	none	ARACNe-GTEx	-	-
ADNP	NIN	0	E	FALSE	FALSE	FALSE	TRUE	none	none	none	ARACNe-GTEx	-	-
ADNP	NIPBL	0	E	FALSE	FALSE	FALSE	TRUE	none	none	none	ARACNe-GTEx	-	-
ADNP	NKRF	0	E	FALSE	FALSE	FALSE	TRUE	none	none	none	ARACNe-GTEx	-	-
ADNP	NME6	0	E	FALSE	FALSE	FALSE	TRUE	none	none	none	ARACNe-GTEx	-	-
ADNP	NOL11	0	E	FALSE	FALSE	FALSE	TRUE	none	none	none	ARACNe-GTEx	-	-
ADNP	NOL8	0	E	FALSE	FALSE	FALSE	TRUE	none	none	none	ARACNe-GTEx	-	-
ADNP	NOP56P1	0	D	FALSE	TRUE	FALSE	FALSE	none	ReMap	none	none	-	-
ADNP	NOSTRIN	0	D	FALSE	TRUE	FALSE	FALSE	none	ReMap	none	none	-	-
ADNP	NPRL3	0	D	FALSE	TRUE	FALSE	FALSE	none	ReMap	none	none	-	-
ADNP	NRF1	0	E	FALSE	FALSE	FALSE	TRUE	none	none	none	ARACNe-GTEx	-	-
ADNP	NSD1	0	E	FALSE	FALSE	FALSE	TRUE	none	none	none	ARACNe-GTEx	-	-
ADNP	NSMAF	0	E	FALSE	FALSE	FALSE	TRUE	none	none	none	ARACNe-GTEx	-	-
ADNP	NSUN3	0	E	FALSE	FALSE	FALSE	TRUE	none	none	none	ARACNe-GTEx	-	-
ADNP	NUDT21	0	E	FALSE	FALSE	FALSE	TRUE	none	none	none	ARACNe-GTEx	-	-
ADNP	NUP133	0	E	FALSE	FALSE	FALSE	TRUE	none	none	none	ARACNe-GTEx	-	-
ADNP	NUP153	0	E	FALSE	FALSE	FALSE	TRUE	none	none	none	ARACNe-GTEx	-	-
ADNP	NUP160	0	E	FALSE	FALSE	FALSE	TRUE	none	none	none	ARACNe-GTEx	-	-
ADNP	NUP210	0	D	FALSE	TRUE	FALSE	FALSE	none	ReMap	none	none	-	-
ADNP	NUP62	0	E	FALSE	FALSE	FALSE	TRUE	none	none	none	ARACNe-GTEx	-	-
ADNP	OAS3	0	D	FALSE	TRUE	FALSE	FALSE	none	ReMap	none	none	-	-
ADNP	ORC4	0	E	FALSE	FALSE	FALSE	TRUE	none	none	none	ARACNe-GTEx	-	-
ADNP	OSBP	0	E	FALSE	FALSE	FALSE	TRUE	none	none	none	ARACNe-GTEx	-	-
ADNP	PACSIN1	0	D	FALSE	TRUE	FALSE	FALSE	none	ReMap	none	none	-	-
ADNP	PADI4	0	D	FALSE	TRUE	FALSE	FALSE	none	ReMap	none	none	-	-
ADNP	PALB2	0	E	FALSE	FALSE	FALSE	TRUE	none	none	none	ARACNe-GTEx	-	-
ADNP	PANK2	0	E	FALSE	FALSE	FALSE	TRUE	none	none	none	ARACNe-GTEx	-	-
ADNP	PAPOLA	0	E	FALSE	FALSE	FALSE	TRUE	none	none	none	ARACNe-GTEx	-	-
ADNP	PAPOLG	0	E	FALSE	FALSE	FALSE	TRUE	none	none	none	ARACNe-GTEx	-	-
ADNP	PARG	0	E	FALSE	FALSE	FALSE	TRUE	none	none	none	ARACNe-GTEx	-	-
ADNP	PAXIP1	0	E	FALSE	FALSE	FALSE	TRUE	none	none	none	ARACNe-GTEx	-	-
ADNP	PBRM1	0	E	FALSE	FALSE	FALSE	TRUE	none	none	none	ARACNe-GTEx	-	-
ADNP	PCBP1	0	D	FALSE	TRUE	FALSE	FALSE	none	ReMap	none	none	-	-
ADNP	PCNX4	0	E	FALSE	FALSE	FALSE	TRUE	none	none	none	ARACNe-GTEx	-	-
ADNP	PDE4A	0	D	FALSE	TRUE	FALSE	FALSE	none	ReMap	none	none	-	-
ADNP	PDGFB	0	D	FALSE	TRUE	FALSE	FALSE	none	ReMap	none	none	-	-
ADNP	PDPK1	0	E	FALSE	FALSE	FALSE	TRUE	none	none	none	ARACNe-GTEx	-	-
ADNP	PDS5B	0	E	FALSE	FALSE	FALSE	TRUE	none	none	none	ARACNe-GTEx	-	-
ADNP	PECAM1	0	D	FALSE	TRUE	FALSE	FALSE	none	ReMap	none	none	-	-
ADNP	PGGT1B	0	E	FALSE	FALSE	FALSE	TRUE	none	none	none	ARACNe-GTEx	-	-
ADNP	PHF14	0	E	FALSE	FALSE	FALSE	TRUE	none	none	none	ARACNe-GTEx	-	-
ADNP	PHF20	0	D	FALSE	TRUE	FALSE	FALSE	none	ReMap	none	none	-	-
ADNP	PHKB	0	E	FALSE	FALSE	FALSE	TRUE	none	none	none	ARACNe-GTEx	-	-
ADNP	PIAS1	0	E	FALSE	FALSE	FALSE	TRUE	none	none	none	ARACNe-GTEx	-	-
ADNP	PIGM	0	E	FALSE	FALSE	FALSE	TRUE	none	none	none	ARACNe-GTEx	-	-
ADNP	PIK3C3	0	E	FALSE	FALSE	FALSE	TRUE	none	none	none	ARACNe-GTEx	-	-
ADNP	PIK3R4	0	E	FALSE	FALSE	FALSE	TRUE	none	none	none	ARACNe-GTEx	-	-
ADNP	PIP4K2B	0	E	FALSE	FALSE	FALSE	TRUE	none	none	none	ARACNe-GTEx	-	-
ADNP	PKHD1L1	0	D	FALSE	TRUE	FALSE	FALSE	none	ReMap	none	none	-	-
ADNP	PKN1	0	D	FALSE	TRUE	FALSE	FALSE	none	ReMap	none	none	-	-
ADNP	PKN2	0	E	FALSE	FALSE	FALSE	TRUE	none	none	none	ARACNe-GTEx	-	-
ADNP	PLCG2	0	D	FALSE	TRUE	FALSE	FALSE	none	ReMap	none	none	-	-
ADNP	PLD1	0	D	FALSE	TRUE	FALSE	FALSE	none	ReMap	none	none	-	-
ADNP	PLIN3	0	D	FALSE	TRUE	FALSE	FALSE	none	ReMap	none	none	-	-
ADNP	PLPP7	0	D	FALSE	TRUE	FALSE	FALSE	none	ReMap	none	none	-	-
ADNP	PLRG1	0	E	FALSE	FALSE	FALSE	TRUE	none	none	none	ARACNe-GTEx	-	-
ADNP	PLXNA2	0	D	FALSE	TRUE	FALSE	FALSE	none	ReMap	none	none	-	-
ADNP	PLXND1	0	D	FALSE	TRUE	FALSE	FALSE	none	ReMap	none	none	-	-
ADNP	PMS2	0	E	FALSE	FALSE	FALSE	TRUE	none	none	none	ARACNe-GTEx	-	-
ADNP	POGK	0	E	FALSE	FALSE	FALSE	TRUE	none	none	none	ARACNe-GTEx	-	-
ADNP	POLA1	0	E	FALSE	FALSE	FALSE	TRUE	none	none	none	ARACNe-GTEx	-	-
ADNP	POLH	0	E	FALSE	FALSE	FALSE	TRUE	none	none	none	ARACNe-GTEx	-	-
ADNP	POLR1B	0	E	FALSE	FALSE	FALSE	TRUE	none	none	none	ARACNe-GTEx	-	-
ADNP	POM121L2	0	D	FALSE	TRUE	FALSE	FALSE	none	ReMap	none	none	-	-
ADNP	PPHLN1	0	E	FALSE	FALSE	FALSE	TRUE	none	none	none	ARACNe-GTEx	-	-
ADNP	PPIL3	0	D	FALSE	TRUE	FALSE	FALSE	none	ReMap	none	none	-	-
ADNP	PPP1CC	0	E	FALSE	FALSE	FALSE	TRUE	none	none	none	ARACNe-GTEx	-	-
ADNP	PPP1R16B	0	D	FALSE	TRUE	FALSE	FALSE	none	ReMap	none	none	-	-
ADNP	PPP1R21	0	E	FALSE	FALSE	FALSE	TRUE	none	none	none	ARACNe-GTEx	-	-
ADNP	PPP4R3B	0	E	FALSE	FALSE	FALSE	TRUE	none	none	none	ARACNe-GTEx	-	-
ADNP	PRCP	0	D	FALSE	TRUE	FALSE	FALSE	none	ReMap	none	none	-	-
ADNP	PRDM2	0	E	FALSE	FALSE	FALSE	TRUE	none	none	none	ARACNe-GTEx	-	-
ADNP	PREX1	0	D	FALSE	TRUE	FALSE	FALSE	none	ReMap	none	none	-	-
ADNP	PRF1	0	D	FALSE	TRUE	FALSE	FALSE	none	ReMap	none	none	-	-
ADNP	PRKAR2B	0	D	FALSE	TRUE	FALSE	FALSE	none	ReMap	none	none	-	-
ADNP	PRKCB	0	D	FALSE	TRUE	FALSE	FALSE	none	ReMap	none	none	-	-
ADNP	PRPF4B	0	E	FALSE	FALSE	FALSE	TRUE	none	none	none	ARACNe-GTEx	-	-
ADNP	PRR14L	0	E	FALSE	FALSE	FALSE	TRUE	none	none	none	ARACNe-GTEx	-	-
ADNP	PRR5	0	D	FALSE	TRUE	FALSE	FALSE	none	ReMap	none	none	-	-
ADNP	PRRC1	0	E	FALSE	FALSE	FALSE	TRUE	none	none	none	ARACNe-GTEx	-	-
ADNP	PRSS16	0	D	FALSE	TRUE	FALSE	FALSE	none	ReMap	none	none	-	-
ADNP	PRX	0	D	FALSE	TRUE	FALSE	FALSE	none	ReMap	none	none	-	-
ADNP	PSMD5	0	E	FALSE	FALSE	FALSE	TRUE	none	none	none	ARACNe-GTEx	-	-
ADNP	PTCD2	0	E	FALSE	FALSE	FALSE	TRUE	none	none	none	ARACNe-GTEx	-	-
ADNP	PTP4A2	0	D	FALSE	TRUE	FALSE	FALSE	none	ReMap	none	none	-	-
ADNP	PTP4A3	0	D	FALSE	TRUE	FALSE	FALSE	none	ReMap	none	none	-	-
ADNP	PTPN4	0	E	FALSE	FALSE	FALSE	TRUE	none	none	none	ARACNe-GTEx	-	-
ADNP	PTPRJ	0	D	FALSE	TRUE	FALSE	FALSE	none	ReMap	none	none	-	-
ADNP	PTPRS	0	D	FALSE	TRUE	FALSE	FALSE	none	ReMap	none	none	-	-
ADNP	PUM2	0	E	FALSE	FALSE	FALSE	TRUE	none	none	none	ARACNe-GTEx	-	-
ADNP	PUS7L	0	E	FALSE	FALSE	FALSE	TRUE	none	none	none	ARACNe-GTEx	-	-
ADNP	PVT1	0	D	FALSE	TRUE	FALSE	FALSE	none	ReMap	none	none	-	-
ADNP	PWWP2A	0	E	FALSE	FALSE	FALSE	TRUE	none	none	none	ARACNe-GTEx	-	-
ADNP	PYGO2	0	E	FALSE	FALSE	FALSE	TRUE	none	none	none	ARACNe-GTEx	-	-
ADNP	QSER1	0	E	FALSE	FALSE	FALSE	TRUE	none	none	none	ARACNe-GTEx	-	-
ADNP	QTRT2	0	E	FALSE	FALSE	FALSE	TRUE	none	none	none	ARACNe-GTEx	-	-
ADNP	R3HCC1L	0	E	FALSE	FALSE	FALSE	TRUE	none	none	none	ARACNe-GTEx	-	-
ADNP	R3HDM2	0	D	FALSE	TRUE	FALSE	FALSE	none	ReMap	none	none	-	-
ADNP	R3HDM4	0	D	FALSE	TRUE	FALSE	FALSE	none	ReMap	none	none	-	-
ADNP	RAB14	0	E	FALSE	FALSE	FALSE	TRUE	none	none	none	ARACNe-GTEx	-	-
ADNP	RABGAP1L	0	E	FALSE	FALSE	FALSE	TRUE	none	none	none	ARACNe-GTEx	-	-
ADNP	RAD17	0	E	FALSE	FALSE	FALSE	TRUE	none	none	none	ARACNe-GTEx	-	-
ADNP	RAD50	0	E	FALSE	FALSE	FALSE	TRUE	none	none	none	ARACNe-GTEx	-	-
ADNP	RALGAPB	0	E	FALSE	FALSE	FALSE	TRUE	none	none	none	ARACNe-GTEx	-	-
ADNP	RALGPS1	0	D	FALSE	TRUE	FALSE	FALSE	none	ReMap	none	none	-	-
ADNP	RANBP2	0	E	FALSE	FALSE	FALSE	TRUE	none	none	none	ARACNe-GTEx	-	-
ADNP	RANBP6	0	E	FALSE	FALSE	FALSE	TRUE	none	none	none	ARACNe-GTEx	-	-
ADNP	RANBP9	0	D	FALSE	TRUE	FALSE	FALSE	none	ReMap	none	none	-	-
ADNP	RAP1GAP	0	D	FALSE	TRUE	FALSE	FALSE	none	ReMap	none	none	-	-
ADNP	RAPGEF5	0	D	FALSE	TRUE	FALSE	FALSE	none	ReMap	none	none	-	-
ADNP	RASA1	0	E	FALSE	FALSE	FALSE	TRUE	none	none	none	ARACNe-GTEx	-	-
ADNP	RASAL1	0	D	FALSE	TRUE	FALSE	FALSE	none	ReMap	none	none	-	-
ADNP	RBBP4	0	E	FALSE	FALSE	FALSE	TRUE	none	none	none	ARACNe-GTEx	-	-
ADNP	RBBP5	0	E	FALSE	FALSE	FALSE	TRUE	none	none	none	ARACNe-GTEx	-	-
ADNP	RBM19	0	D	FALSE	TRUE	FALSE	FALSE	none	ReMap	none	none	-	-
ADNP	RBM22	0	E	FALSE	FALSE	FALSE	TRUE	none	none	none	ARACNe-GTEx	-	-
ADNP	RBM26	0	E	FALSE	FALSE	FALSE	TRUE	none	none	none	ARACNe-GTEx	-	-
ADNP	RBM41	0	E	FALSE	FALSE	FALSE	TRUE	none	none	none	ARACNe-GTEx	-	-
ADNP	RBM48	0	E	FALSE	FALSE	FALSE	TRUE	none	none	none	ARACNe-GTEx	-	-
ADNP	RBSN	0	E	FALSE	FALSE	FALSE	TRUE	none	none	none	ARACNe-GTEx	-	-
ADNP	RCHY1	0	E	FALSE	FALSE	FALSE	TRUE	none	none	none	ARACNe-GTEx	-	-
ADNP	RELB	0	D	FALSE	TRUE	FALSE	FALSE	none	ReMap	none	none	-	-
ADNP	REST	0	E	FALSE	FALSE	FALSE	TRUE	none	none	none	ARACNe-GTEx	-	-
ADNP	RFC1	0	E	FALSE	FALSE	FALSE	TRUE	none	none	none	ARACNe-GTEx	-	-
ADNP	RFX1	0	D	FALSE	TRUE	FALSE	FALSE	none	ReMap	none	none	-	-
ADNP	RFX7	0	E	FALSE	FALSE	FALSE	TRUE	none	none	none	ARACNe-GTEx	-	-
ADNP	RHOBTB1	0	D	FALSE	TRUE	FALSE	FALSE	none	ReMap	none	none	-	-
ADNP	RHOH	0	D	FALSE	TRUE	FALSE	FALSE	none	ReMap	none	none	-	-
ADNP	RICTOR	0	D	FALSE	TRUE	FALSE	FALSE	none	ReMap	none	none	-	-
ADNP	RN7SL121P	0	D	FALSE	TRUE	FALSE	FALSE	none	ReMap	none	none	-	-
ADNP	RN7SL636P	0	D	FALSE	TRUE	FALSE	FALSE	none	ReMap	none	none	-	-
ADNP	RNF10P1	0	D	FALSE	TRUE	FALSE	FALSE	none	ReMap	none	none	-	-
ADNP	RNF170	0	E	FALSE	FALSE	FALSE	TRUE	none	none	none	ARACNe-GTEx	-	-
ADNP	RNF2	0	E	FALSE	FALSE	FALSE	TRUE	none	none	none	ARACNe-GTEx	-	-
ADNP	RNF20	0	E	FALSE	FALSE	FALSE	TRUE	none	none	none	ARACNe-GTEx	-	-
ADNP	RNF216	0	D	FALSE	TRUE	FALSE	FALSE	none	ReMap	none	none	-	-
ADNP	RNF219	0	E	FALSE	FALSE	FALSE	TRUE	none	none	none	ARACNe-GTEx	-	-
ADNP	RNU1	0	D	FALSE	TRUE	FALSE	FALSE	none	ReMap	none	none	-	-
ADNP	RNU6	0	D	FALSE	TRUE	FALSE	FALSE	none	ReMap	none	none	-	-
ADNP	RNU7	0	D	FALSE	TRUE	FALSE	FALSE	none	ReMap	none	none	-	-
ADNP	RP1	0	D	FALSE	TRUE	FALSE	FALSE	none	ReMap	none	none	-	-
ADNP	RP11	0	D	FALSE	TRUE	FALSE	FALSE	none	ReMap	none	none	-	-
ADNP	RP3	0	D	FALSE	TRUE	FALSE	FALSE	none	ReMap	none	none	-	-
ADNP	RP4	0	D	FALSE	TRUE	FALSE	FALSE	none	ReMap	none	none	-	-
ADNP	RP5	0	D	FALSE	TRUE	FALSE	FALSE	none	ReMap	none	none	-	-
ADNP	RPAP2	0	E	FALSE	FALSE	FALSE	TRUE	none	none	none	ARACNe-GTEx	-	-
ADNP	RPH3A	0	D	FALSE	TRUE	FALSE	FALSE	none	ReMap	none	none	-	-
ADNP	RPL10P2	0	D	FALSE	TRUE	FALSE	FALSE	none	ReMap	none	none	-	-
ADNP	RPL12P33	0	D	FALSE	TRUE	FALSE	FALSE	none	ReMap	none	none	-	-
ADNP	RPL7L1	0	E	FALSE	FALSE	FALSE	TRUE	none	none	none	ARACNe-GTEx	-	-
ADNP	RPRD1B	0	E	FALSE	FALSE	FALSE	TRUE	none	none	none	ARACNe-GTEx	-	-
ADNP	RPRD2	0	E	FALSE	FALSE	FALSE	TRUE	none	none	none	ARACNe-GTEx	-	-
ADNP	RPS10P7	0	D	FALSE	TRUE	FALSE	FALSE	none	ReMap	none	none	-	-
ADNP	RPS4XP19	0	D	FALSE	TRUE	FALSE	FALSE	none	ReMap	none	none	-	-
ADNP	RPS6KC1	0	E	FALSE	FALSE	FALSE	TRUE	none	none	none	ARACNe-GTEx	-	-
ADNP	RPSAP2	0	D	FALSE	TRUE	FALSE	FALSE	none	ReMap	none	none	-	-
ADNP	RRAGC	0	D	FALSE	TRUE	FALSE	FALSE	none	ReMap	none	none	-	-
ADNP	RRP1B	0	E	FALSE	FALSE	FALSE	TRUE	none	none	none	ARACNe-GTEx	-	-
ADNP	RSBN1	0	E	FALSE	FALSE	FALSE	TRUE	none	none	none	ARACNe-GTEx	-	-
ADNP	RSBN1L	0	E	FALSE	FALSE	FALSE	TRUE	none	none	none	ARACNe-GTEx	-	-
ADNP	RSF1	0	E	FALSE	FALSE	FALSE	TRUE	none	none	none	ARACNe-GTEx	-	-
ADNP	RSPRY1	0	E	FALSE	FALSE	FALSE	TRUE	none	none	none	ARACNe-GTEx	-	-
ADNP	RSRC2	0	E	FALSE	FALSE	FALSE	TRUE	none	none	none	ARACNe-GTEx	-	-
ADNP	RTN4	0	D	FALSE	TRUE	FALSE	FALSE	none	ReMap	none	none	-	-
ADNP	RUNX1	0	D	FALSE	TRUE	FALSE	FALSE	none	ReMap	none	none	-	-
ADNP	RYK	0	E	FALSE	FALSE	FALSE	TRUE	none	none	none	ARACNe-GTEx	-	-
ADNP	SACM1L	0	E	FALSE	FALSE	FALSE	TRUE	none	none	none	ARACNe-GTEx	-	-
ADNP	SAMSN1	0	D	FALSE	TRUE	FALSE	FALSE	none	ReMap	none	none	-	-
ADNP	SART3	0	E	FALSE	FALSE	FALSE	TRUE	none	none	none	ARACNe-GTEx	-	-
ADNP	SASS6	0	E	FALSE	FALSE	FALSE	TRUE	none	none	none	ARACNe-GTEx	-	-
ADNP	SBNO1	0	E	FALSE	FALSE	FALSE	TRUE	none	none	none	ARACNe-GTEx	-	-
ADNP	SCAF11	0	E	FALSE	FALSE	FALSE	TRUE	none	none	none	ARACNe-GTEx	-	-
ADNP	SCAF8	0	E	FALSE	FALSE	FALSE	TRUE	none	none	none	ARACNe-GTEx	-	-
ADNP	SCARB1	0	D	FALSE	TRUE	FALSE	FALSE	none	ReMap	none	none	-	-
ADNP	SCN1B	0	D	FALSE	TRUE	FALSE	FALSE	none	ReMap	none	none	-	-
ADNP	SCYL3	0	E	FALSE	FALSE	FALSE	TRUE	none	none	none	ARACNe-GTEx	-	-
ADNP	SDC3	0	D	FALSE	TRUE	FALSE	FALSE	none	ReMap	none	none	-	-
ADNP	SDS	0	D	FALSE	TRUE	FALSE	FALSE	none	ReMap	none	none	-	-
ADNP	SDSL	0	D	FALSE	TRUE	FALSE	FALSE	none	ReMap	none	none	-	-
ADNP	SEC14L1	0	D	FALSE	TRUE	FALSE	FALSE	none	ReMap	none	none	-	-
ADNP	SEC22A	0	E	FALSE	FALSE	FALSE	TRUE	none	none	none	ARACNe-GTEx	-	-
ADNP	SELPLG	0	D	FALSE	TRUE	FALSE	FALSE	none	ReMap	none	none	-	-
ADNP	SEMA6B	0	D	FALSE	TRUE	FALSE	FALSE	none	ReMap	none	none	-	-
ADNP	SEPT9	0	D	FALSE	TRUE	FALSE	FALSE	none	ReMap	none	none	-	-
ADNP	SERINC5	0	D	FALSE	TRUE	FALSE	FALSE	none	ReMap	none	none	-	-
ADNP	SERPINH1	0	D	FALSE	TRUE	FALSE	FALSE	none	ReMap	none	none	-	-
ADNP	SETD2	0	E	FALSE	FALSE	FALSE	TRUE	none	none	none	ARACNe-GTEx	-	-
ADNP	SETDB1	0	E	FALSE	FALSE	FALSE	TRUE	none	none	none	ARACNe-GTEx	-	-
ADNP	SETX	0	E	FALSE	FALSE	FALSE	TRUE	none	none	none	ARACNe-GTEx	-	-
ADNP	SGSM1	0	D	FALSE	TRUE	FALSE	FALSE	none	ReMap	none	none	-	-
ADNP	SH2B1	0	D	FALSE	TRUE	FALSE	FALSE	none	ReMap	none	none	-	-
ADNP	SIKE1	0	E	FALSE	FALSE	FALSE	TRUE	none	none	none	ARACNe-GTEx	-	-
ADNP	SIPA1L3	0	D	FALSE	TRUE	FALSE	FALSE	none	ReMap	none	none	-	-
ADNP	SKIV2L2	0	E	FALSE	FALSE	FALSE	TRUE	none	none	none	ARACNe-GTEx	-	-
ADNP	SLC13A3	0	D	FALSE	TRUE	FALSE	FALSE	none	ReMap	none	none	-	-
ADNP	SLC1A7	0	D	FALSE	TRUE	FALSE	FALSE	none	ReMap	none	none	-	-
ADNP	SLC22A23	0	D	FALSE	TRUE	FALSE	FALSE	none	ReMap	none	none	-	-
ADNP	SLC25A25	0	D	FALSE	TRUE	FALSE	FALSE	none	ReMap	none	none	-	-
ADNP	SLC29A3	0	D	FALSE	TRUE	FALSE	FALSE	none	ReMap	none	none	-	-
ADNP	SLC30A6	0	E	FALSE	FALSE	FALSE	TRUE	none	none	none	ARACNe-GTEx	-	-
ADNP	SLC33A1	0	E	FALSE	FALSE	FALSE	TRUE	none	none	none	ARACNe-GTEx	-	-
ADNP	SLC35D1	0	E	FALSE	FALSE	FALSE	TRUE	none	none	none	ARACNe-GTEx	-	-
ADNP	SLC39A9	0	E	FALSE	FALSE	FALSE	TRUE	none	none	none	ARACNe-GTEx	-	-
ADNP	SLC44A2	0	D	FALSE	TRUE	FALSE	FALSE	none	ReMap	none	none	-	-
ADNP	SLC4A1	0	D	FALSE	TRUE	FALSE	FALSE	none	ReMap	none	none	-	-
ADNP	SLC6A6	0	D	FALSE	TRUE	FALSE	FALSE	none	ReMap	none	none	-	-
ADNP	SLC7A11	0	D	FALSE	TRUE	FALSE	FALSE	none	ReMap	none	none	-	-
ADNP	SLC8B1	0	D	FALSE	TRUE	FALSE	FALSE	none	ReMap	none	none	-	-
ADNP	SLC9A6	0	E	FALSE	FALSE	FALSE	TRUE	none	none	none	ARACNe-GTEx	-	-
ADNP	SLCO2B1	0	D	FALSE	TRUE	FALSE	FALSE	none	ReMap	none	none	-	-
ADNP	SLF2	0	E	FALSE	FALSE	FALSE	TRUE	none	none	none	ARACNe-GTEx	-	-
ADNP	SLTM	0	E	FALSE	FALSE	FALSE	TRUE	none	none	none	ARACNe-GTEx	-	-
ADNP	SMAD2	0	E	FALSE	FALSE	FALSE	TRUE	none	none	none	ARACNe-GTEx	-	-
ADNP	SMAD4	0	E	FALSE	FALSE	FALSE	TRUE	none	none	none	ARACNe-GTEx	-	-
ADNP	SMARCA2	0	E	FALSE	FALSE	FALSE	TRUE	none	none	none	ARACNe-GTEx	-	-
ADNP	SMARCAD1	0	E	FALSE	FALSE	FALSE	TRUE	none	none	none	ARACNe-GTEx	-	-
ADNP	SMARCC1	0	D	FALSE	TRUE	FALSE	FALSE	none	ReMap	none	none	-	-
ADNP	SMARCE1	0	E	FALSE	FALSE	FALSE	TRUE	none	none	none	ARACNe-GTEx	-	-
ADNP	SMC3	0	E	FALSE	FALSE	FALSE	TRUE	none	none	none	ARACNe-GTEx	-	-
ADNP	SMIM25	0	D	FALSE	TRUE	FALSE	FALSE	none	ReMap	none	none	-	-
ADNP	SMU1	0	E	FALSE	FALSE	FALSE	TRUE	none	none	none	ARACNe-GTEx	-	-
ADNP	SMURF1	0	D	FALSE	TRUE	FALSE	FALSE	none	ReMap	none	none	-	-
ADNP	SMYD3	0	D	FALSE	TRUE	FALSE	FALSE	none	ReMap	none	none	-	-
ADNP	SNIP1	0	E	FALSE	FALSE	FALSE	TRUE	none	none	none	ARACNe-GTEx	-	-
ADNP	SNRNP48	0	E	FALSE	FALSE	FALSE	TRUE	none	none	none	ARACNe-GTEx	-	-
ADNP	SNUPN	0	D	FALSE	TRUE	FALSE	FALSE	none	ReMap	none	none	-	-
ADNP	SNX1	0	E	FALSE	FALSE	FALSE	TRUE	none	none	none	ARACNe-GTEx	-	-
ADNP	SNX9	0	D	FALSE	TRUE	FALSE	FALSE	none	ReMap	none	none	-	-
ADNP	SOCS6	0	E	FALSE	FALSE	FALSE	TRUE	none	none	none	ARACNe-GTEx	-	-
ADNP	SOGA1	0	D	FALSE	TRUE	FALSE	FALSE	none	ReMap	none	none	-	-
ADNP	SON	0	E	FALSE	FALSE	FALSE	TRUE	none	none	none	ARACNe-GTEx	-	-
ADNP	SOS1	0	E	FALSE	FALSE	FALSE	TRUE	none	none	none	ARACNe-GTEx	-	-
ADNP	SOX5	0	D	FALSE	TRUE	FALSE	FALSE	none	ReMap	none	none	-	-
ADNP	SP1	0	E	FALSE	FALSE	FALSE	TRUE	none	none	none	ARACNe-GTEx	-	-
ADNP	SP3	0	E	FALSE	FALSE	FALSE	TRUE	none	none	none	ARACNe-GTEx	-	-
ADNP	SP4	0	E	FALSE	FALSE	FALSE	TRUE	none	none	none	ARACNe-GTEx	-	-
ADNP	SPAST	0	E	FALSE	FALSE	FALSE	TRUE	none	none	none	ARACNe-GTEx	-	-
ADNP	SPC24	0	D	FALSE	TRUE	FALSE	FALSE	none	ReMap	none	none	-	-
ADNP	SPG11	0	E	FALSE	FALSE	FALSE	TRUE	none	none	none	ARACNe-GTEx	-	-
ADNP	SPIN1	0	E	FALSE	FALSE	FALSE	TRUE	none	none	none	ARACNe-GTEx	-	-
ADNP	SPINT2	0	D	FALSE	TRUE	FALSE	FALSE	none	ReMap	none	none	-	-
ADNP	SPOCD1	0	D	FALSE	TRUE	FALSE	FALSE	none	ReMap	none	none	-	-
ADNP	SPPL3	0	D	FALSE	TRUE	FALSE	FALSE	none	ReMap	none	none	-	-
ADNP	SRC	0	D	FALSE	TRUE	FALSE	FALSE	none	ReMap	none	none	-	-
ADNP	SS18	0	E	FALSE	FALSE	FALSE	TRUE	none	none	none	ARACNe-GTEx	-	-
ADNP	STAM2	0	E	FALSE	FALSE	FALSE	TRUE	none	none	none	ARACNe-GTEx	-	-
ADNP	STK10	0	D	FALSE	TRUE	FALSE	FALSE	none	ReMap	none	none	-	-
ADNP	STK38	0	E	FALSE	FALSE	FALSE	TRUE	none	none	none	ARACNe-GTEx	-	-
ADNP	STRIP1	0	E	FALSE	FALSE	FALSE	TRUE	none	none	none	ARACNe-GTEx	-	-
ADNP	STX18	0	D	FALSE	TRUE	FALSE	FALSE	none	ReMap	none	none	-	-
ADNP	SUDS3	0	E	FALSE	FALSE	FALSE	TRUE	none	none	none	ARACNe-GTEx	-	-
ADNP	SULT2B1	0	D	FALSE	TRUE	FALSE	FALSE	none	ReMap	none	none	-	-
ADNP	SUMO1P1	0	D	FALSE	TRUE	FALSE	FALSE	none	ReMap	none	none	-	-
ADNP	SUPT20H	0	E	FALSE	FALSE	FALSE	TRUE	none	none	none	ARACNe-GTEx	-	-
ADNP	SUZ12	0	E	FALSE	FALSE	FALSE	TRUE	none	none	none	ARACNe-GTEx	-	-
ADNP	SYCN	0	D	FALSE	TRUE	FALSE	FALSE	none	ReMap	none	none	-	-
ADNP	SYN3	0	D	FALSE	TRUE	FALSE	FALSE	none	ReMap	none	none	-	-
ADNP	SYNJ2	0	D	FALSE	TRUE	FALSE	FALSE	none	ReMap	none	none	-	-
ADNP	SYNJ2BP	0	E	FALSE	FALSE	FALSE	TRUE	none	none	none	ARACNe-GTEx	-	-
ADNP	SYNRG	0	E	FALSE	FALSE	FALSE	TRUE	none	none	none	ARACNe-GTEx	-	-
ADNP	SYT3	0	D	FALSE	TRUE	FALSE	FALSE	none	ReMap	none	none	-	-
ADNP	TAB3	0	E	FALSE	FALSE	FALSE	TRUE	none	none	none	ARACNe-GTEx	-	-
ADNP	TADA1	0	E	FALSE	FALSE	FALSE	TRUE	none	none	none	ARACNe-GTEx	-	-
ADNP	TAF1B	0	D	FALSE	TRUE	FALSE	FALSE	none	ReMap	none	none	-	-
ADNP	TAF4	0	E	FALSE	FALSE	FALSE	TRUE	none	none	none	ARACNe-GTEx	-	-
ADNP	TAF7	0	E	FALSE	FALSE	FALSE	TRUE	none	none	none	ARACNe-GTEx	-	-
ADNP	TAF8	0	E	FALSE	FALSE	FALSE	TRUE	none	none	none	ARACNe-GTEx	-	-
ADNP	TAOK3	0	D	FALSE	TRUE	FALSE	FALSE	none	ReMap	none	none	-	-
ADNP	TBCCD1	0	E	FALSE	FALSE	FALSE	TRUE	none	none	none	ARACNe-GTEx	-	-
ADNP	TBL1XR1	0	E	FALSE	FALSE	FALSE	TRUE	none	none	none	ARACNe-GTEx	-	-
ADNP	TBXAS1	0	D	FALSE	TRUE	FALSE	FALSE	none	ReMap	none	none	-	-
ADNP	TCEANC2	0	E	FALSE	FALSE	FALSE	TRUE	none	none	none	ARACNe-GTEx	-	-
ADNP	TCF3	0	D	FALSE	TRUE	FALSE	FALSE	none	ReMap	none	none	-	-
ADNP	TDRD7	0	E	FALSE	FALSE	FALSE	TRUE	none	none	none	ARACNe-GTEx	-	-
ADNP	TERF2	0	E	FALSE	FALSE	FALSE	TRUE	none	none	none	ARACNe-GTEx	-	-
ADNP	TESC	0	D	FALSE	TRUE	FALSE	FALSE	none	ReMap	none	none	-	-
ADNP	TEX10	0	E	FALSE	FALSE	FALSE	TRUE	none	none	none	ARACNe-GTEx	-	-
ADNP	TFAM	0	E	FALSE	FALSE	FALSE	TRUE	none	none	none	ARACNe-GTEx	-	-
ADNP	TFCP2	0	E	FALSE	FALSE	FALSE	TRUE	none	none	none	ARACNe-GTEx	-	-
ADNP	TGM2	0	D	FALSE	TRUE	FALSE	FALSE	none	ReMap	none	none	-	-
ADNP	TGS1	0	E	FALSE	FALSE	FALSE	TRUE	none	none	none	ARACNe-GTEx	-	-
ADNP	THADA	0	E	FALSE	FALSE	FALSE	TRUE	none	none	none	ARACNe-GTEx	-	-
ADNP	THAP1	0	E	FALSE	FALSE	FALSE	TRUE	none	none	none	ARACNe-GTEx	-	-
ADNP	THRAP3	0	E	FALSE	FALSE	FALSE	TRUE	none	none	none	ARACNe-GTEx	-	-
ADNP	THUMPD1	0	E	FALSE	FALSE	FALSE	TRUE	none	none	none	ARACNe-GTEx	-	-
ADNP	TJP3	0	D	FALSE	TRUE	FALSE	FALSE	none	ReMap	none	none	-	-
ADNP	TLE2	0	D	FALSE	TRUE	FALSE	FALSE	none	ReMap	none	none	-	-
ADNP	TLK1	0	C	FALSE	TRUE	FALSE	TRUE	none	ReMap	none	ARACNe-GTEx	-	-
ADNP	TMC8	0	D	FALSE	TRUE	FALSE	FALSE	none	ReMap	none	none	-	-
ADNP	TMED8	0	E	FALSE	FALSE	FALSE	TRUE	none	none	none	ARACNe-GTEx	-	-
ADNP	TMEM119	0	D	FALSE	TRUE	FALSE	FALSE	none	ReMap	none	none	-	-
ADNP	TMEM132B	0	D	FALSE	TRUE	FALSE	FALSE	none	ReMap	none	none	-	-
ADNP	TMEM168	0	E	FALSE	FALSE	FALSE	TRUE	none	none	none	ARACNe-GTEx	-	-
ADNP	TMEM184C	0	E	FALSE	FALSE	FALSE	TRUE	none	none	none	ARACNe-GTEx	-	-
ADNP	TMEM209	0	E	FALSE	FALSE	FALSE	TRUE	none	none	none	ARACNe-GTEx	-	-
ADNP	TMEM212	0	D	FALSE	TRUE	FALSE	FALSE	none	ReMap	none	none	-	-
ADNP	TMEM40	0	D	FALSE	TRUE	FALSE	FALSE	none	ReMap	none	none	-	-
ADNP	TMEM57	0	E	FALSE	FALSE	FALSE	TRUE	none	none	none	ARACNe-GTEx	-	-
ADNP	TMEM64	0	E	FALSE	FALSE	FALSE	TRUE	none	none	none	ARACNe-GTEx	-	-
ADNP	TMEM68	0	E	FALSE	FALSE	FALSE	TRUE	none	none	none	ARACNe-GTEx	-	-
ADNP	TNFRSF1B	0	D	FALSE	TRUE	FALSE	FALSE	none	ReMap	none	none	-	-
ADNP	TNPO1	0	E	FALSE	FALSE	FALSE	TRUE	none	none	none	ARACNe-GTEx	-	-
ADNP	TOPBP1	0	E	FALSE	FALSE	FALSE	TRUE	none	none	none	ARACNe-GTEx	-	-
ADNP	TOPORS	0	E	FALSE	FALSE	FALSE	TRUE	none	none	none	ARACNe-GTEx	-	-
ADNP	TP53BP1	0	E	FALSE	FALSE	FALSE	TRUE	none	none	none	ARACNe-GTEx	-	-
ADNP	TPD52L1	0	D	FALSE	TRUE	FALSE	FALSE	none	ReMap	none	none	-	-
ADNP	TRANK1	0	D	FALSE	TRUE	FALSE	FALSE	none	ReMap	none	none	-	-
ADNP	TRAPPC11	0	E	FALSE	FALSE	FALSE	TRUE	none	none	none	ARACNe-GTEx	-	-
ADNP	TRAPPC8	0	E	FALSE	FALSE	FALSE	TRUE	none	none	none	ARACNe-GTEx	-	-
ADNP	TRERNA1	0	D	FALSE	TRUE	FALSE	FALSE	none	ReMap	none	none	-	-
ADNP	TRIB1	0	D	FALSE	TRUE	FALSE	FALSE	none	ReMap	none	none	-	-
ADNP	TRIM13	0	E	FALSE	FALSE	FALSE	TRUE	none	none	none	ARACNe-GTEx	-	-
ADNP	TRIM32	0	E	FALSE	FALSE	FALSE	TRUE	none	none	none	ARACNe-GTEx	-	-
ADNP	TRIM4	0	E	FALSE	FALSE	FALSE	TRUE	none	none	none	ARACNe-GTEx	-	-
ADNP	TRIM41	0	D	FALSE	TRUE	FALSE	FALSE	none	ReMap	none	none	-	-
ADNP	TRIP11	0	E	FALSE	FALSE	FALSE	TRUE	none	none	none	ARACNe-GTEx	-	-
ADNP	TRIP4	0	E	FALSE	FALSE	FALSE	TRUE	none	none	none	ARACNe-GTEx	-	-
ADNP	TRMT1L	0	E	FALSE	FALSE	FALSE	TRUE	none	none	none	ARACNe-GTEx	-	-
ADNP	TRMT5	0	E	FALSE	FALSE	FALSE	TRUE	none	none	none	ARACNe-GTEx	-	-
ADNP	TRPM7	0	E	FALSE	FALSE	FALSE	TRUE	none	none	none	ARACNe-GTEx	-	-
ADNP	TRPV4	0	D	FALSE	TRUE	FALSE	FALSE	none	ReMap	none	none	-	-
ADNP	TRRAP	0	E	FALSE	FALSE	FALSE	TRUE	none	none	none	ARACNe-GTEx	-	-
ADNP	TSHZ2	0	D	FALSE	TRUE	FALSE	FALSE	none	ReMap	none	none	-	-
ADNP	TSN	0	E	FALSE	FALSE	FALSE	TRUE	none	none	none	ARACNe-GTEx	-	-
ADNP	TSPAN18	0	D	FALSE	TRUE	FALSE	FALSE	none	ReMap	none	none	-	-
ADNP	TTC37	0	E	FALSE	FALSE	FALSE	TRUE	none	none	none	ARACNe-GTEx	-	-
ADNP	TTC39A	0	D	FALSE	TRUE	FALSE	FALSE	none	ReMap	none	none	-	-
ADNP	TUBGCP4	0	E	FALSE	FALSE	FALSE	TRUE	none	none	none	ARACNe-GTEx	-	-
ADNP	TUBGCP5	0	E	FALSE	FALSE	FALSE	TRUE	none	none	none	ARACNe-GTEx	-	-
ADNP	TXNL4B	0	E	FALSE	FALSE	FALSE	TRUE	none	none	none	ARACNe-GTEx	-	-
ADNP	TXNRD1	0	D	FALSE	TRUE	FALSE	FALSE	none	ReMap	none	none	-	-
ADNP	UBA3	0	E	FALSE	FALSE	FALSE	TRUE	none	none	none	ARACNe-GTEx	-	-
ADNP	UBE2F	0	D	FALSE	TRUE	FALSE	FALSE	none	ReMap	none	none	-	-
ADNP	UBE3A	0	E	FALSE	FALSE	FALSE	TRUE	none	none	none	ARACNe-GTEx	-	-
ADNP	UBFD1	0	E	FALSE	FALSE	FALSE	TRUE	none	none	none	ARACNe-GTEx	-	-
ADNP	UBP1	0	E	FALSE	FALSE	FALSE	TRUE	none	none	none	ARACNe-GTEx	-	-
ADNP	UBQLN2	0	E	FALSE	FALSE	FALSE	TRUE	none	none	none	ARACNe-GTEx	-	-
ADNP	UBR3	0	D	FALSE	TRUE	FALSE	FALSE	none	ReMap	none	none	-	-
ADNP	UBR5	0	E	FALSE	FALSE	FALSE	TRUE	none	none	none	ARACNe-GTEx	-	-
ADNP	UBTF	0	E	FALSE	FALSE	FALSE	TRUE	none	none	none	ARACNe-GTEx	-	-
ADNP	UBXN2B	0	E	FALSE	FALSE	FALSE	TRUE	none	none	none	ARACNe-GTEx	-	-
ADNP	UBXN7	0	E	FALSE	FALSE	FALSE	TRUE	none	none	none	ARACNe-GTEx	-	-
ADNP	UNC13A	0	D	FALSE	TRUE	FALSE	FALSE	none	ReMap	none	none	-	-
ADNP	USF3	0	E	FALSE	FALSE	FALSE	TRUE	none	none	none	ARACNe-GTEx	-	-
ADNP	USP1	0	E	FALSE	FALSE	FALSE	TRUE	none	none	none	ARACNe-GTEx	-	-
ADNP	USP22	0	E	FALSE	FALSE	FALSE	TRUE	none	none	none	ARACNe-GTEx	-	-
ADNP	USP28	0	E	FALSE	FALSE	FALSE	TRUE	none	none	none	ARACNe-GTEx	-	-
ADNP	USP30	0	E	FALSE	FALSE	FALSE	TRUE	none	none	none	ARACNe-GTEx	-	-
ADNP	USP33	0	E	FALSE	FALSE	FALSE	TRUE	none	none	none	ARACNe-GTEx	-	-
ADNP	USP48	0	E	FALSE	FALSE	FALSE	TRUE	none	none	none	ARACNe-GTEx	-	-
ADNP	USP7	0	E	FALSE	FALSE	FALSE	TRUE	none	none	none	ARACNe-GTEx	-	-
ADNP	USP8	0	E	FALSE	FALSE	FALSE	TRUE	none	none	none	ARACNe-GTEx	-	-
ADNP	UTP14C	0	E	FALSE	FALSE	FALSE	TRUE	none	none	none	ARACNe-GTEx	-	-
ADNP	UTRN	0	D	FALSE	TRUE	FALSE	FALSE	none	ReMap	none	none	-	-
ADNP	VCL	0	D	FALSE	TRUE	FALSE	FALSE	none	ReMap	none	none	-	-
ADNP	VEZF1	0	E	FALSE	FALSE	FALSE	TRUE	none	none	none	ARACNe-GTEx	-	-
ADNP	VHL	0	E	FALSE	FALSE	FALSE	TRUE	none	none	none	ARACNe-GTEx	-	-
ADNP	VPS26B	0	E	FALSE	FALSE	FALSE	TRUE	none	none	none	ARACNe-GTEx	-	-
ADNP	VPS36	0	E	FALSE	FALSE	FALSE	TRUE	none	none	none	ARACNe-GTEx	-	-
ADNP	VPS50	0	E	FALSE	FALSE	FALSE	TRUE	none	none	none	ARACNe-GTEx	-	-
ADNP	VWCE	0	D	FALSE	TRUE	FALSE	FALSE	none	ReMap	none	none	-	-
ADNP	WDR20	0	E	FALSE	FALSE	FALSE	TRUE	none	none	none	ARACNe-GTEx	-	-
ADNP	WDR44	0	E	FALSE	FALSE	FALSE	TRUE	none	none	none	ARACNe-GTEx	-	-
ADNP	WDR48	0	E	FALSE	FALSE	FALSE	TRUE	none	none	none	ARACNe-GTEx	-	-
ADNP	WDR82	0	E	FALSE	FALSE	FALSE	TRUE	none	none	none	ARACNe-GTEx	-	-
ADNP	WHSC1L1	0	E	FALSE	FALSE	FALSE	TRUE	none	none	none	ARACNe-GTEx	-	-
ADNP	WIPF2	0	E	FALSE	FALSE	FALSE	TRUE	none	none	none	ARACNe-GTEx	-	-
ADNP	WNT4	0	D	FALSE	TRUE	FALSE	FALSE	none	ReMap	none	none	-	-
ADNP	WSCD2	0	D	FALSE	TRUE	FALSE	FALSE	none	ReMap	none	none	-	-
ADNP	XPO1	0	E	FALSE	FALSE	FALSE	TRUE	none	none	none	ARACNe-GTEx	-	-
ADNP	XPO7	0	E	FALSE	FALSE	FALSE	TRUE	none	none	none	ARACNe-GTEx	-	-
ADNP	XPR1	0	D	FALSE	TRUE	FALSE	FALSE	none	ReMap	none	none	-	-
ADNP	XXBAC	0	D	FALSE	TRUE	FALSE	FALSE	none	ReMap	none	none	-	-
ADNP	XXYLT1	0	D	FALSE	TRUE	FALSE	FALSE	none	ReMap	none	none	-	-
ADNP	Y_RNA.478	0	D	FALSE	TRUE	FALSE	FALSE	none	ReMap	none	none	-	-
ADNP	YLPM1	0	E	FALSE	FALSE	FALSE	TRUE	none	none	none	ARACNe-GTEx	-	-
ADNP	YTHDF2	0	E	FALSE	FALSE	FALSE	TRUE	none	none	none	ARACNe-GTEx	-	-
ADNP	YTHDF3	0	E	FALSE	FALSE	FALSE	TRUE	none	none	none	ARACNe-GTEx	-	-
ADNP	YY1	0	E	FALSE	FALSE	FALSE	TRUE	none	none	none	ARACNe-GTEx	-	-
ADNP	ZBED5	0	E	FALSE	FALSE	FALSE	TRUE	none	none	none	ARACNe-GTEx	-	-
ADNP	ZBTB1	0	E	FALSE	FALSE	FALSE	TRUE	none	none	none	ARACNe-GTEx	-	-
ADNP	ZBTB11	0	E	FALSE	FALSE	FALSE	TRUE	none	none	none	ARACNe-GTEx	-	-
ADNP	ZBTB24	0	E	FALSE	FALSE	FALSE	TRUE	none	none	none	ARACNe-GTEx	-	-
ADNP	ZBTB33	0	E	FALSE	FALSE	FALSE	TRUE	none	none	none	ARACNe-GTEx	-	-
ADNP	ZBTB41	0	E	FALSE	FALSE	FALSE	TRUE	none	none	none	ARACNe-GTEx	-	-
ADNP	ZBTB44	0	E	FALSE	FALSE	FALSE	TRUE	none	none	none	ARACNe-GTEx	-	-
ADNP	ZBTB6	0	E	FALSE	FALSE	FALSE	TRUE	none	none	none	ARACNe-GTEx	-	-
ADNP	ZC3H13	0	E	FALSE	FALSE	FALSE	TRUE	none	none	none	ARACNe-GTEx	-	-
ADNP	ZC3H14	0	E	FALSE	FALSE	FALSE	TRUE	none	none	none	ARACNe-GTEx	-	-
ADNP	ZCCHC11	0	D	FALSE	TRUE	FALSE	FALSE	none	ReMap	none	none	-	-
ADNP	ZCCHC4	0	E	FALSE	FALSE	FALSE	TRUE	none	none	none	ARACNe-GTEx	-	-
ADNP	ZCCHC9	0	E	FALSE	FALSE	FALSE	TRUE	none	none	none	ARACNe-GTEx	-	-
ADNP	ZDHHC14	0	D	FALSE	TRUE	FALSE	FALSE	none	ReMap	none	none	-	-
ADNP	ZFP1	0	E	FALSE	FALSE	FALSE	TRUE	none	none	none	ARACNe-GTEx	-	-
ADNP	ZFP36L2	0	D	FALSE	TRUE	FALSE	FALSE	none	ReMap	none	none	-	-
ADNP	ZFX	0	E	FALSE	FALSE	FALSE	TRUE	none	none	none	ARACNe-GTEx	-	-
ADNP	ZKSCAN5	0	E	FALSE	FALSE	FALSE	TRUE	none	none	none	ARACNe-GTEx	-	-
ADNP	ZMIZ1	0	D	FALSE	TRUE	FALSE	FALSE	none	ReMap	none	none	-	-
ADNP	ZMYM1	0	E	FALSE	FALSE	FALSE	TRUE	none	none	none	ARACNe-GTEx	-	-
ADNP	ZMYM4	0	C	FALSE	TRUE	FALSE	TRUE	none	ReMap	none	ARACNe-GTEx	-	-
ADNP	ZMYND8	0	D	FALSE	TRUE	FALSE	FALSE	none	ReMap	none	none	-	-
ADNP	ZNF12	0	E	FALSE	FALSE	FALSE	TRUE	none	none	none	ARACNe-GTEx	-	-
ADNP	ZNF131	0	E	FALSE	FALSE	FALSE	TRUE	none	none	none	ARACNe-GTEx	-	-
ADNP	ZNF134	0	E	FALSE	FALSE	FALSE	TRUE	none	none	none	ARACNe-GTEx	-	-
ADNP	ZNF146	0	E	FALSE	FALSE	FALSE	TRUE	none	none	none	ARACNe-GTEx	-	-
ADNP	ZNF148	0	E	FALSE	FALSE	FALSE	TRUE	none	none	none	ARACNe-GTEx	-	-
ADNP	ZNF180	0	E	FALSE	FALSE	FALSE	TRUE	none	none	none	ARACNe-GTEx	-	-
ADNP	ZNF184	0	E	FALSE	FALSE	FALSE	TRUE	none	none	none	ARACNe-GTEx	-	-
ADNP	ZNF217	0	D	FALSE	TRUE	FALSE	FALSE	none	ReMap	none	none	-	-
ADNP	ZNF236	0	E	FALSE	FALSE	FALSE	TRUE	none	none	none	ARACNe-GTEx	-	-
ADNP	ZNF24	0	E	FALSE	FALSE	FALSE	TRUE	none	none	none	ARACNe-GTEx	-	-
ADNP	ZNF253	0	E	FALSE	FALSE	FALSE	TRUE	none	none	none	ARACNe-GTEx	-	-
ADNP	ZNF260	0	E	FALSE	FALSE	FALSE	TRUE	none	none	none	ARACNe-GTEx	-	-
ADNP	ZNF264	0	E	FALSE	FALSE	FALSE	TRUE	none	none	none	ARACNe-GTEx	-	-
ADNP	ZNF292	0	E	FALSE	FALSE	FALSE	TRUE	none	none	none	ARACNe-GTEx	-	-
ADNP	ZNF317	0	E	FALSE	FALSE	FALSE	TRUE	none	none	none	ARACNe-GTEx	-	-
ADNP	ZNF318	0	E	FALSE	FALSE	FALSE	TRUE	none	none	none	ARACNe-GTEx	-	-
ADNP	ZNF354C	0	E	FALSE	FALSE	FALSE	TRUE	none	none	none	ARACNe-GTEx	-	-
ADNP	ZNF384	0	E	FALSE	FALSE	FALSE	TRUE	none	none	none	ARACNe-GTEx	-	-
ADNP	ZNF397	0	E	FALSE	FALSE	FALSE	TRUE	none	none	none	ARACNe-GTEx	-	-
ADNP	ZNF41	0	E	FALSE	FALSE	FALSE	TRUE	none	none	none	ARACNe-GTEx	-	-
ADNP	ZNF45	0	E	FALSE	FALSE	FALSE	TRUE	none	none	none	ARACNe-GTEx	-	-
ADNP	ZNF507	0	E	FALSE	FALSE	FALSE	TRUE	none	none	none	ARACNe-GTEx	-	-
ADNP	ZNF510	0	E	FALSE	FALSE	FALSE	TRUE	none	none	none	ARACNe-GTEx	-	-
ADNP	ZNF518B	0	E	FALSE	FALSE	FALSE	TRUE	none	none	none	ARACNe-GTEx	-	-
ADNP	ZNF549	0	E	FALSE	FALSE	FALSE	TRUE	none	none	none	ARACNe-GTEx	-	-
ADNP	ZNF551	0	E	FALSE	FALSE	FALSE	TRUE	none	none	none	ARACNe-GTEx	-	-
ADNP	ZNF557	0	E	FALSE	FALSE	FALSE	TRUE	none	none	none	ARACNe-GTEx	-	-
ADNP	ZNF561	0	E	FALSE	FALSE	FALSE	TRUE	none	none	none	ARACNe-GTEx	-	-
ADNP	ZNF562	0	E	FALSE	FALSE	FALSE	TRUE	none	none	none	ARACNe-GTEx	-	-
ADNP	ZNF616	0	E	FALSE	FALSE	FALSE	TRUE	none	none	none	ARACNe-GTEx	-	-
ADNP	ZNF618	0	D	FALSE	TRUE	FALSE	FALSE	none	ReMap	none	none	-	-
ADNP	ZNF623	0	E	FALSE	FALSE	FALSE	TRUE	none	none	none	ARACNe-GTEx	-	-
ADNP	ZNF641	0	E	FALSE	FALSE	FALSE	TRUE	none	none	none	ARACNe-GTEx	-	-
ADNP	ZNF737	0	E	FALSE	FALSE	FALSE	TRUE	none	none	none	ARACNe-GTEx	-	-
ADNP	ZNF740	0	E	FALSE	FALSE	FALSE	TRUE	none	none	none	ARACNe-GTEx	-	-
ADNP	ZNF766	0	E	FALSE	FALSE	FALSE	TRUE	none	none	none	ARACNe-GTEx	-	-
ADNP	ZNF772	0	E	FALSE	FALSE	FALSE	TRUE	none	none	none	ARACNe-GTEx	-	-
ADNP	ZNF776	0	E	FALSE	FALSE	FALSE	TRUE	none	none	none	ARACNe-GTEx	-	-
ADNP	ZNF84	0	E	FALSE	FALSE	FALSE	TRUE	none	none	none	ARACNe-GTEx	-	-
ADNP	ZNF845	0	E	FALSE	FALSE	FALSE	TRUE	none	none	none	ARACNe-GTEx	-	-
ADNP	ZSCAN12	0	E	FALSE	FALSE	FALSE	TRUE	none	none	none	ARACNe-GTEx	-	-
ADNP	ZSCAN25	0	E	FALSE	FALSE	FALSE	TRUE	none	none	none	ARACNe-GTEx	-	-
ADNP	ZSCAN29	0	E	FALSE	FALSE	FALSE	TRUE	none	none	none	ARACNe-GTEx	-	-
ADNP	ZXDA	0	E	FALSE	FALSE	FALSE	TRUE	none	none	none	ARACNe-GTEx	-	-
ADNP	ZXDB	0	E	FALSE	FALSE	FALSE	TRUE	none	none	none	ARACNe-GTEx	-	-
ADNP	ZZZ3	0	E	FALSE	FALSE	FALSE	TRUE	none	none	none	ARACNe-GTEx	-	-
ADNP2	ABL2	0	E	FALSE	FALSE	FALSE	TRUE	none	none	none	ARACNe-GTEx	-	-
ADNP2	ADAM17	0	E	FALSE	FALSE	FALSE	TRUE	none	none	none	ARACNe-GTEx	-	-
ADNP2	AFF4	0	E	FALSE	FALSE	FALSE	TRUE	none	none	none	ARACNe-GTEx	-	-
ADNP2	AGFG1	0	E	FALSE	FALSE	FALSE	TRUE	none	none	none	ARACNe-GTEx	-	-
ADNP2	ALG9	0	E	FALSE	FALSE	FALSE	TRUE	none	none	none	ARACNe-GTEx	-	-
ADNP2	ANKHD1	0	E	FALSE	FALSE	FALSE	TRUE	none	none	none	ARACNe-GTEx	-	-
ADNP2	AP1G1	0	E	FALSE	FALSE	FALSE	TRUE	none	none	none	ARACNe-GTEx	-	-
ADNP2	AREL1	0	E	FALSE	FALSE	FALSE	TRUE	none	none	none	ARACNe-GTEx	-	-
ADNP2	ARID2	0	E	FALSE	FALSE	FALSE	TRUE	none	none	none	ARACNe-GTEx	-	-
ADNP2	ARIH1	0	E	FALSE	FALSE	FALSE	TRUE	none	none	none	ARACNe-GTEx	-	-
ADNP2	ARL5B	0	E	FALSE	FALSE	FALSE	TRUE	none	none	none	ARACNe-GTEx	-	-
ADNP2	ATP13A3	0	E	FALSE	FALSE	FALSE	TRUE	none	none	none	ARACNe-GTEx	-	-
ADNP2	ATXN1L	0	E	FALSE	FALSE	FALSE	TRUE	none	none	none	ARACNe-GTEx	-	-
ADNP2	ATXN7	0	E	FALSE	FALSE	FALSE	TRUE	none	none	none	ARACNe-GTEx	-	-
ADNP2	AVL9	0	E	FALSE	FALSE	FALSE	TRUE	none	none	none	ARACNe-GTEx	-	-
ADNP2	BARD1	0	E	FALSE	FALSE	FALSE	TRUE	none	none	none	ARACNe-GTEx	-	-
ADNP2	BIN3	0	E	FALSE	FALSE	FALSE	TRUE	none	none	none	ARACNe-GTEx	-	-
ADNP2	BLOC1S6	0	E	FALSE	FALSE	FALSE	TRUE	none	none	none	ARACNe-GTEx	-	-
ADNP2	BMP2K	0	E	FALSE	FALSE	FALSE	TRUE	none	none	none	ARACNe-GTEx	-	-
ADNP2	BNIP2	0	E	FALSE	FALSE	FALSE	TRUE	none	none	none	ARACNe-GTEx	-	-
ADNP2	BRWD3	0	E	FALSE	FALSE	FALSE	TRUE	none	none	none	ARACNe-GTEx	-	-
ADNP2	BTAF1	0	E	FALSE	FALSE	FALSE	TRUE	none	none	none	ARACNe-GTEx	-	-
ADNP2	C9orf69	0	E	FALSE	FALSE	FALSE	TRUE	none	none	none	ARACNe-GTEx	-	-
ADNP2	C9orf72	0	E	FALSE	FALSE	FALSE	TRUE	none	none	none	ARACNe-GTEx	-	-
ADNP2	CACUL1	0	E	FALSE	FALSE	FALSE	TRUE	none	none	none	ARACNe-GTEx	-	-
ADNP2	CAPZA1	0	E	FALSE	FALSE	FALSE	TRUE	none	none	none	ARACNe-GTEx	-	-
ADNP2	CBWD1	0	E	FALSE	FALSE	FALSE	TRUE	none	none	none	ARACNe-GTEx	-	-
ADNP2	CCDC59	0	E	FALSE	FALSE	FALSE	TRUE	none	none	none	ARACNe-GTEx	-	-
ADNP2	CCDC9	0	E	FALSE	FALSE	FALSE	TRUE	none	none	none	ARACNe-GTEx	-	-
ADNP2	CCNH	0	E	FALSE	FALSE	FALSE	TRUE	none	none	none	ARACNe-GTEx	-	-
ADNP2	CCNL1	0	E	FALSE	FALSE	FALSE	TRUE	none	none	none	ARACNe-GTEx	-	-
ADNP2	CCNT1	0	E	FALSE	FALSE	FALSE	TRUE	none	none	none	ARACNe-GTEx	-	-
ADNP2	CCNT2	0	E	FALSE	FALSE	FALSE	TRUE	none	none	none	ARACNe-GTEx	-	-
ADNP2	CDK12	0	E	FALSE	FALSE	FALSE	TRUE	none	none	none	ARACNe-GTEx	-	-
ADNP2	CFAP45	0	E	FALSE	FALSE	FALSE	TRUE	none	none	none	ARACNe-GTEx	-	-
ADNP2	CHCHD1	0	E	FALSE	FALSE	FALSE	TRUE	none	none	none	ARACNe-GTEx	-	-
ADNP2	CHD1	0	E	FALSE	FALSE	FALSE	TRUE	none	none	none	ARACNe-GTEx	-	-
ADNP2	CHD2	0	E	FALSE	FALSE	FALSE	TRUE	none	none	none	ARACNe-GTEx	-	-
ADNP2	CHMP1B	0	E	FALSE	FALSE	FALSE	TRUE	none	none	none	ARACNe-GTEx	-	-
ADNP2	CSNK1A1	0	E	FALSE	FALSE	FALSE	TRUE	none	none	none	ARACNe-GTEx	-	-
ADNP2	CSNK2A1	0	E	FALSE	FALSE	FALSE	TRUE	none	none	none	ARACNe-GTEx	-	-
ADNP2	CUL4A	0	E	FALSE	FALSE	FALSE	TRUE	none	none	none	ARACNe-GTEx	-	-
ADNP2	CWC25	0	E	FALSE	FALSE	FALSE	TRUE	none	none	none	ARACNe-GTEx	-	-
ADNP2	DBF4	0	E	FALSE	FALSE	FALSE	TRUE	none	none	none	ARACNe-GTEx	-	-
ADNP2	DCAF16	0	E	FALSE	FALSE	FALSE	TRUE	none	none	none	ARACNe-GTEx	-	-
ADNP2	DCUN1D3	0	E	FALSE	FALSE	FALSE	TRUE	none	none	none	ARACNe-GTEx	-	-
ADNP2	DDX19B	0	E	FALSE	FALSE	FALSE	TRUE	none	none	none	ARACNe-GTEx	-	-
ADNP2	DDX21	0	E	FALSE	FALSE	FALSE	TRUE	none	none	none	ARACNe-GTEx	-	-
ADNP2	DDX24	0	E	FALSE	FALSE	FALSE	TRUE	none	none	none	ARACNe-GTEx	-	-
ADNP2	DDX47	0	E	FALSE	FALSE	FALSE	TRUE	none	none	none	ARACNe-GTEx	-	-
ADNP2	DENND2C	0	E	FALSE	FALSE	FALSE	TRUE	none	none	none	ARACNe-GTEx	-	-
ADNP2	DHX15	0	E	FALSE	FALSE	FALSE	TRUE	none	none	none	ARACNe-GTEx	-	-
ADNP2	DHX36	0	E	FALSE	FALSE	FALSE	TRUE	none	none	none	ARACNe-GTEx	-	-
ADNP2	DHX8	0	E	FALSE	FALSE	FALSE	TRUE	none	none	none	ARACNe-GTEx	-	-
ADNP2	DIABLO	0	E	FALSE	FALSE	FALSE	TRUE	none	none	none	ARACNe-GTEx	-	-
ADNP2	DIS3	0	E	FALSE	FALSE	FALSE	TRUE	none	none	none	ARACNe-GTEx	-	-
ADNP2	DIS3L2	0	E	FALSE	FALSE	FALSE	TRUE	none	none	none	ARACNe-GTEx	-	-
ADNP2	DNTTIP2	0	E	FALSE	FALSE	FALSE	TRUE	none	none	none	ARACNe-GTEx	-	-
ADNP2	EAF1	0	E	FALSE	FALSE	FALSE	TRUE	none	none	none	ARACNe-GTEx	-	-
ADNP2	EBLN2	0	E	FALSE	FALSE	FALSE	TRUE	none	none	none	ARACNe-GTEx	-	-
ADNP2	EIF4A1	0	E	FALSE	FALSE	FALSE	TRUE	none	none	none	ARACNe-GTEx	-	-
ADNP2	EIF5	0	E	FALSE	FALSE	FALSE	TRUE	none	none	none	ARACNe-GTEx	-	-
ADNP2	ELL	0	E	FALSE	FALSE	FALSE	TRUE	none	none	none	ARACNe-GTEx	-	-
ADNP2	ELL2	0	E	FALSE	FALSE	FALSE	TRUE	none	none	none	ARACNe-GTEx	-	-
ADNP2	EMG1	0	E	FALSE	FALSE	FALSE	TRUE	none	none	none	ARACNe-GTEx	-	-
ADNP2	EOGT	0	E	FALSE	FALSE	FALSE	TRUE	none	none	none	ARACNe-GTEx	-	-
ADNP2	EPT1	0	E	FALSE	FALSE	FALSE	TRUE	none	none	none	ARACNe-GTEx	-	-
ADNP2	ERVK3-1	0	E	FALSE	FALSE	FALSE	TRUE	none	none	none	ARACNe-GTEx	-	-
ADNP2	ETV3	0	E	FALSE	FALSE	FALSE	TRUE	none	none	none	ARACNe-GTEx	-	-
ADNP2	EXOC8	0	E	FALSE	FALSE	FALSE	TRUE	none	none	none	ARACNe-GTEx	-	-
ADNP2	FAF2	0	E	FALSE	FALSE	FALSE	TRUE	none	none	none	ARACNe-GTEx	-	-
ADNP2	FAM189B	0	E	FALSE	FALSE	FALSE	TRUE	none	none	none	ARACNe-GTEx	-	-
ADNP2	FAM91A1	0	E	FALSE	FALSE	FALSE	TRUE	none	none	none	ARACNe-GTEx	-	-
ADNP2	FASTKD2	0	E	FALSE	FALSE	FALSE	TRUE	none	none	none	ARACNe-GTEx	-	-
ADNP2	FEM1C	0	E	FALSE	FALSE	FALSE	TRUE	none	none	none	ARACNe-GTEx	-	-
ADNP2	FKTN	0	E	FALSE	FALSE	FALSE	TRUE	none	none	none	ARACNe-GTEx	-	-
ADNP2	FNBP4	0	E	FALSE	FALSE	FALSE	TRUE	none	none	none	ARACNe-GTEx	-	-
ADNP2	FNIP1	0	E	FALSE	FALSE	FALSE	TRUE	none	none	none	ARACNe-GTEx	-	-
ADNP2	FNIP2	0	E	FALSE	FALSE	FALSE	TRUE	none	none	none	ARACNe-GTEx	-	-
ADNP2	FOSL2	0	E	FALSE	FALSE	FALSE	TRUE	none	none	none	ARACNe-GTEx	-	-
ADNP2	FOXJ3	0	E	FALSE	FALSE	FALSE	TRUE	none	none	none	ARACNe-GTEx	-	-
ADNP2	GAPVD1	0	E	FALSE	FALSE	FALSE	TRUE	none	none	none	ARACNe-GTEx	-	-
ADNP2	GATAD2B	0	E	FALSE	FALSE	FALSE	TRUE	none	none	none	ARACNe-GTEx	-	-
ADNP2	GK	0	E	FALSE	FALSE	FALSE	TRUE	none	none	none	ARACNe-GTEx	-	-
ADNP2	GMEB2	0	E	FALSE	FALSE	FALSE	TRUE	none	none	none	ARACNe-GTEx	-	-
ADNP2	GON4L	0	E	FALSE	FALSE	FALSE	TRUE	none	none	none	ARACNe-GTEx	-	-
ADNP2	GTPBP1	0	E	FALSE	FALSE	FALSE	TRUE	none	none	none	ARACNe-GTEx	-	-
ADNP2	GTPBP4	0	E	FALSE	FALSE	FALSE	TRUE	none	none	none	ARACNe-GTEx	-	-
ADNP2	H1F0	0	E	FALSE	FALSE	FALSE	TRUE	none	none	none	ARACNe-GTEx	-	-
ADNP2	H1FX	0	E	FALSE	FALSE	FALSE	TRUE	none	none	none	ARACNe-GTEx	-	-
ADNP2	H3F3B	0	E	FALSE	FALSE	FALSE	TRUE	none	none	none	ARACNe-GTEx	-	-
ADNP2	HAUS2	0	E	FALSE	FALSE	FALSE	TRUE	none	none	none	ARACNe-GTEx	-	-
ADNP2	HIPK1	0	E	FALSE	FALSE	FALSE	TRUE	none	none	none	ARACNe-GTEx	-	-
ADNP2	HNRNPA0	0	E	FALSE	FALSE	FALSE	TRUE	none	none	none	ARACNe-GTEx	-	-
ADNP2	HNRNPL	0	E	FALSE	FALSE	FALSE	TRUE	none	none	none	ARACNe-GTEx	-	-
ADNP2	HTRA2	0	E	FALSE	FALSE	FALSE	TRUE	none	none	none	ARACNe-GTEx	-	-
ADNP2	IARS	0	E	FALSE	FALSE	FALSE	TRUE	none	none	none	ARACNe-GTEx	-	-
ADNP2	IKZF5	0	E	FALSE	FALSE	FALSE	TRUE	none	none	none	ARACNe-GTEx	-	-
ADNP2	IST1	0	E	FALSE	FALSE	FALSE	TRUE	none	none	none	ARACNe-GTEx	-	-
ADNP2	JARID2	0	E	FALSE	FALSE	FALSE	TRUE	none	none	none	ARACNe-GTEx	-	-
ADNP2	KDM5A	0	E	FALSE	FALSE	FALSE	TRUE	none	none	none	ARACNe-GTEx	-	-
ADNP2	KDM5B	0	E	FALSE	FALSE	FALSE	TRUE	none	none	none	ARACNe-GTEx	-	-
ADNP2	KDM7A	0	E	FALSE	FALSE	FALSE	TRUE	none	none	none	ARACNe-GTEx	-	-
ADNP2	KIAA1468	0	E	FALSE	FALSE	FALSE	TRUE	none	none	none	ARACNe-GTEx	-	-
ADNP2	LAMTOR2	0	E	FALSE	FALSE	FALSE	TRUE	none	none	none	ARACNe-GTEx	-	-
ADNP2	LARP4	0	E	FALSE	FALSE	FALSE	TRUE	none	none	none	ARACNe-GTEx	-	-
ADNP2	LARP4B	0	E	FALSE	FALSE	FALSE	TRUE	none	none	none	ARACNe-GTEx	-	-
ADNP2	LEMD3	0	E	FALSE	FALSE	FALSE	TRUE	none	none	none	ARACNe-GTEx	-	-
ADNP2	LIG3	0	E	FALSE	FALSE	FALSE	TRUE	none	none	none	ARACNe-GTEx	-	-
ADNP2	LMTK2	0	E	FALSE	FALSE	FALSE	TRUE	none	none	none	ARACNe-GTEx	-	-
ADNP2	LONRF1	0	E	FALSE	FALSE	FALSE	TRUE	none	none	none	ARACNe-GTEx	-	-
ADNP2	LRRC40	0	E	FALSE	FALSE	FALSE	TRUE	none	none	none	ARACNe-GTEx	-	-
ADNP2	LRRC8B	0	E	FALSE	FALSE	FALSE	TRUE	none	none	none	ARACNe-GTEx	-	-
ADNP2	LRRFIP2	0	E	FALSE	FALSE	FALSE	TRUE	none	none	none	ARACNe-GTEx	-	-
ADNP2	LUC7L2	0	E	FALSE	FALSE	FALSE	TRUE	none	none	none	ARACNe-GTEx	-	-
ADNP2	MAPK1IP1L	0	E	FALSE	FALSE	FALSE	TRUE	none	none	none	ARACNe-GTEx	-	-
ADNP2	MAPK6	0	E	FALSE	FALSE	FALSE	TRUE	none	none	none	ARACNe-GTEx	-	-
ADNP2	MAPK8	0	E	FALSE	FALSE	FALSE	TRUE	none	none	none	ARACNe-GTEx	-	-
ADNP2	MARCH6	0	E	FALSE	FALSE	FALSE	TRUE	none	none	none	ARACNe-GTEx	-	-
ADNP2	MASTL	0	E	FALSE	FALSE	FALSE	TRUE	none	none	none	ARACNe-GTEx	-	-
ADNP2	MED13	0	E	FALSE	FALSE	FALSE	TRUE	none	none	none	ARACNe-GTEx	-	-
ADNP2	MED14	0	E	FALSE	FALSE	FALSE	TRUE	none	none	none	ARACNe-GTEx	-	-
ADNP2	MFSD14A	0	E	FALSE	FALSE	FALSE	TRUE	none	none	none	ARACNe-GTEx	-	-
ADNP2	MIDN	0	E	FALSE	FALSE	FALSE	TRUE	none	none	none	ARACNe-GTEx	-	-
ADNP2	MKKS	0	E	FALSE	FALSE	FALSE	TRUE	none	none	none	ARACNe-GTEx	-	-
ADNP2	MON1A	0	E	FALSE	FALSE	FALSE	TRUE	none	none	none	ARACNe-GTEx	-	-
ADNP2	MRPL51	0	E	FALSE	FALSE	FALSE	TRUE	none	none	none	ARACNe-GTEx	-	-
ADNP2	MTHFR	0	E	FALSE	FALSE	FALSE	TRUE	none	none	none	ARACNe-GTEx	-	-
ADNP2	MTMR7	0	E	FALSE	FALSE	FALSE	TRUE	none	none	none	ARACNe-GTEx	-	-
ADNP2	MTPAP	0	E	FALSE	FALSE	FALSE	TRUE	none	none	none	ARACNe-GTEx	-	-
ADNP2	MYSM1	0	E	FALSE	FALSE	FALSE	TRUE	none	none	none	ARACNe-GTEx	-	-
ADNP2	NAA15	0	E	FALSE	FALSE	FALSE	TRUE	none	none	none	ARACNe-GTEx	-	-
ADNP2	NAA25	0	E	FALSE	FALSE	FALSE	TRUE	none	none	none	ARACNe-GTEx	-	-
ADNP2	NAA35	0	E	FALSE	FALSE	FALSE	TRUE	none	none	none	ARACNe-GTEx	-	-
ADNP2	NAF1	0	E	FALSE	FALSE	FALSE	TRUE	none	none	none	ARACNe-GTEx	-	-
ADNP2	NECAP1	0	E	FALSE	FALSE	FALSE	TRUE	none	none	none	ARACNe-GTEx	-	-
ADNP2	NFX1	0	E	FALSE	FALSE	FALSE	TRUE	none	none	none	ARACNe-GTEx	-	-
ADNP2	NOP58	0	E	FALSE	FALSE	FALSE	TRUE	none	none	none	ARACNe-GTEx	-	-
ADNP2	NSRP1	0	E	FALSE	FALSE	FALSE	TRUE	none	none	none	ARACNe-GTEx	-	-
ADNP2	NUP153	0	E	FALSE	FALSE	FALSE	TRUE	none	none	none	ARACNe-GTEx	-	-
ADNP2	NUP155	0	E	FALSE	FALSE	FALSE	TRUE	none	none	none	ARACNe-GTEx	-	-
ADNP2	NUP58	0	E	FALSE	FALSE	FALSE	TRUE	none	none	none	ARACNe-GTEx	-	-
ADNP2	PAPD7	0	E	FALSE	FALSE	FALSE	TRUE	none	none	none	ARACNe-GTEx	-	-
ADNP2	PAQR3	0	E	FALSE	FALSE	FALSE	TRUE	none	none	none	ARACNe-GTEx	-	-
ADNP2	PCF11	0	E	FALSE	FALSE	FALSE	TRUE	none	none	none	ARACNe-GTEx	-	-
ADNP2	PELI1	0	E	FALSE	FALSE	FALSE	TRUE	none	none	none	ARACNe-GTEx	-	-
ADNP2	PER1	0	E	FALSE	FALSE	FALSE	TRUE	none	none	none	ARACNe-GTEx	-	-
ADNP2	PER2	0	E	FALSE	FALSE	FALSE	TRUE	none	none	none	ARACNe-GTEx	-	-
ADNP2	PIGA	0	E	FALSE	FALSE	FALSE	TRUE	none	none	none	ARACNe-GTEx	-	-
ADNP2	PIP5K1A	0	E	FALSE	FALSE	FALSE	TRUE	none	none	none	ARACNe-GTEx	-	-
ADNP2	PMM2	0	E	FALSE	FALSE	FALSE	TRUE	none	none	none	ARACNe-GTEx	-	-
ADNP2	POLR3A	0	E	FALSE	FALSE	FALSE	TRUE	none	none	none	ARACNe-GTEx	-	-
ADNP2	POM121C	0	E	FALSE	FALSE	FALSE	TRUE	none	none	none	ARACNe-GTEx	-	-
ADNP2	POU2F1	0	E	FALSE	FALSE	FALSE	TRUE	none	none	none	ARACNe-GTEx	-	-
ADNP2	PP2D1	0	E	FALSE	FALSE	FALSE	TRUE	none	none	none	ARACNe-GTEx	-	-
ADNP2	PPFIA1	0	E	FALSE	FALSE	FALSE	TRUE	none	none	none	ARACNe-GTEx	-	-
ADNP2	PPP1R15B	0	E	FALSE	FALSE	FALSE	TRUE	none	none	none	ARACNe-GTEx	-	-
ADNP2	PPP2R2A	0	E	FALSE	FALSE	FALSE	TRUE	none	none	none	ARACNe-GTEx	-	-
ADNP2	PPP4R3A	0	E	FALSE	FALSE	FALSE	TRUE	none	none	none	ARACNe-GTEx	-	-
ADNP2	PROSER3	0	E	FALSE	FALSE	FALSE	TRUE	none	none	none	ARACNe-GTEx	-	-
ADNP2	PRPF19	0	E	FALSE	FALSE	FALSE	TRUE	none	none	none	ARACNe-GTEx	-	-
ADNP2	PRPF40A	0	E	FALSE	FALSE	FALSE	TRUE	none	none	none	ARACNe-GTEx	-	-
ADNP2	PRRC2C	0	E	FALSE	FALSE	FALSE	TRUE	none	none	none	ARACNe-GTEx	-	-
ADNP2	PSMD11	0	E	FALSE	FALSE	FALSE	TRUE	none	none	none	ARACNe-GTEx	-	-
ADNP2	PSMD12	0	E	FALSE	FALSE	FALSE	TRUE	none	none	none	ARACNe-GTEx	-	-
ADNP2	PSMD6	0	E	FALSE	FALSE	FALSE	TRUE	none	none	none	ARACNe-GTEx	-	-
ADNP2	PSME4	0	E	FALSE	FALSE	FALSE	TRUE	none	none	none	ARACNe-GTEx	-	-
ADNP2	PTBP2	0	E	FALSE	FALSE	FALSE	TRUE	none	none	none	ARACNe-GTEx	-	-
ADNP2	PTP4A1	0	E	FALSE	FALSE	FALSE	TRUE	none	none	none	ARACNe-GTEx	-	-
ADNP2	PTPN1	0	E	FALSE	FALSE	FALSE	TRUE	none	none	none	ARACNe-GTEx	-	-
ADNP2	RAB21	0	E	FALSE	FALSE	FALSE	TRUE	none	none	none	ARACNe-GTEx	-	-
ADNP2	RAB5A	0	E	FALSE	FALSE	FALSE	TRUE	none	none	none	ARACNe-GTEx	-	-
ADNP2	RAD54L2	0	E	FALSE	FALSE	FALSE	TRUE	none	none	none	ARACNe-GTEx	-	-
ADNP2	RBM12	0	E	FALSE	FALSE	FALSE	TRUE	none	none	none	ARACNe-GTEx	-	-
ADNP2	RBM25	0	E	FALSE	FALSE	FALSE	TRUE	none	none	none	ARACNe-GTEx	-	-
ADNP2	RBMXL1	0	E	FALSE	FALSE	FALSE	TRUE	none	none	none	ARACNe-GTEx	-	-
ADNP2	RCOR1	0	E	FALSE	FALSE	FALSE	TRUE	none	none	none	ARACNe-GTEx	-	-
ADNP2	RFC3	0	E	FALSE	FALSE	FALSE	TRUE	none	none	none	ARACNe-GTEx	-	-
ADNP2	RGPD5	0	E	FALSE	FALSE	FALSE	TRUE	none	none	none	ARACNe-GTEx	-	-
ADNP2	RIC1	0	E	FALSE	FALSE	FALSE	TRUE	none	none	none	ARACNe-GTEx	-	-
ADNP2	RINT1	0	E	FALSE	FALSE	FALSE	TRUE	none	none	none	ARACNe-GTEx	-	-
ADNP2	RIOK3	0	E	FALSE	FALSE	FALSE	TRUE	none	none	none	ARACNe-GTEx	-	-
ADNP2	RLF	0	E	FALSE	FALSE	FALSE	TRUE	none	none	none	ARACNe-GTEx	-	-
ADNP2	RLIM	0	E	FALSE	FALSE	FALSE	TRUE	none	none	none	ARACNe-GTEx	-	-
ADNP2	RNF111	0	E	FALSE	FALSE	FALSE	TRUE	none	none	none	ARACNe-GTEx	-	-
ADNP2	RNF138	0	E	FALSE	FALSE	FALSE	TRUE	none	none	none	ARACNe-GTEx	-	-
ADNP2	RNF149	0	E	FALSE	FALSE	FALSE	TRUE	none	none	none	ARACNe-GTEx	-	-
ADNP2	RNMT	0	E	FALSE	FALSE	FALSE	TRUE	none	none	none	ARACNe-GTEx	-	-
ADNP2	RPRD1B	0	E	FALSE	FALSE	FALSE	TRUE	none	none	none	ARACNe-GTEx	-	-
ADNP2	RPUSD3	0	E	FALSE	FALSE	FALSE	TRUE	none	none	none	ARACNe-GTEx	-	-
ADNP2	RRN3	0	E	FALSE	FALSE	FALSE	TRUE	none	none	none	ARACNe-GTEx	-	-
ADNP2	RSPRY1	0	E	FALSE	FALSE	FALSE	TRUE	none	none	none	ARACNe-GTEx	-	-
ADNP2	RSRC2	0	E	FALSE	FALSE	FALSE	TRUE	none	none	none	ARACNe-GTEx	-	-
ADNP2	SAR1A	0	E	FALSE	FALSE	FALSE	TRUE	none	none	none	ARACNe-GTEx	-	-
ADNP2	SART3	0	E	FALSE	FALSE	FALSE	TRUE	none	none	none	ARACNe-GTEx	-	-
ADNP2	SBF2	0	E	FALSE	FALSE	FALSE	TRUE	none	none	none	ARACNe-GTEx	-	-
ADNP2	SCAF8	0	E	FALSE	FALSE	FALSE	TRUE	none	none	none	ARACNe-GTEx	-	-
ADNP2	SCML1	0	E	FALSE	FALSE	FALSE	TRUE	none	none	none	ARACNe-GTEx	-	-
ADNP2	SCYL2	0	E	FALSE	FALSE	FALSE	TRUE	none	none	none	ARACNe-GTEx	-	-
ADNP2	SDE2	0	E	FALSE	FALSE	FALSE	TRUE	none	none	none	ARACNe-GTEx	-	-
ADNP2	SEC16A	0	E	FALSE	FALSE	FALSE	TRUE	none	none	none	ARACNe-GTEx	-	-
ADNP2	SECISBP2	0	E	FALSE	FALSE	FALSE	TRUE	none	none	none	ARACNe-GTEx	-	-
ADNP2	SEH1L	0	E	FALSE	FALSE	FALSE	TRUE	none	none	none	ARACNe-GTEx	-	-
ADNP2	SENP6	0	E	FALSE	FALSE	FALSE	TRUE	none	none	none	ARACNe-GTEx	-	-
ADNP2	SERPINB8	0	E	FALSE	FALSE	FALSE	TRUE	none	none	none	ARACNe-GTEx	-	-
ADNP2	SFPQ	0	E	FALSE	FALSE	FALSE	TRUE	none	none	none	ARACNe-GTEx	-	-
ADNP2	SIAH1	0	E	FALSE	FALSE	FALSE	TRUE	none	none	none	ARACNe-GTEx	-	-
ADNP2	SLC20A1	0	E	FALSE	FALSE	FALSE	TRUE	none	none	none	ARACNe-GTEx	-	-
ADNP2	SLC25A11	0	E	FALSE	FALSE	FALSE	TRUE	none	none	none	ARACNe-GTEx	-	-
ADNP2	SLC25A25	0	E	FALSE	FALSE	FALSE	TRUE	none	none	none	ARACNe-GTEx	-	-
ADNP2	SLC25A32	0	E	FALSE	FALSE	FALSE	TRUE	none	none	none	ARACNe-GTEx	-	-
ADNP2	SLC25A44	0	E	FALSE	FALSE	FALSE	TRUE	none	none	none	ARACNe-GTEx	-	-
ADNP2	SLC30A7	0	E	FALSE	FALSE	FALSE	TRUE	none	none	none	ARACNe-GTEx	-	-
ADNP2	SMC5	0	E	FALSE	FALSE	FALSE	TRUE	none	none	none	ARACNe-GTEx	-	-
ADNP2	SMURF1	0	E	FALSE	FALSE	FALSE	TRUE	none	none	none	ARACNe-GTEx	-	-
ADNP2	SNIP1	0	E	FALSE	FALSE	FALSE	TRUE	none	none	none	ARACNe-GTEx	-	-
ADNP2	SNRPA1	0	E	FALSE	FALSE	FALSE	TRUE	none	none	none	ARACNe-GTEx	-	-
ADNP2	SPAG9	0	E	FALSE	FALSE	FALSE	TRUE	none	none	none	ARACNe-GTEx	-	-
ADNP2	SREK1	0	E	FALSE	FALSE	FALSE	TRUE	none	none	none	ARACNe-GTEx	-	-
ADNP2	SRSF10	0	E	FALSE	FALSE	FALSE	TRUE	none	none	none	ARACNe-GTEx	-	-
ADNP2	STX12	0	E	FALSE	FALSE	FALSE	TRUE	none	none	none	ARACNe-GTEx	-	-
ADNP2	SUPV3L1	0	E	FALSE	FALSE	FALSE	TRUE	none	none	none	ARACNe-GTEx	-	-
ADNP2	TCERG1	0	E	FALSE	FALSE	FALSE	TRUE	none	none	none	ARACNe-GTEx	-	-
ADNP2	THUMPD3	0	E	FALSE	FALSE	FALSE	TRUE	none	none	none	ARACNe-GTEx	-	-
ADNP2	TIMM23B	0	E	FALSE	FALSE	FALSE	TRUE	none	none	none	ARACNe-GTEx	-	-
ADNP2	TMEM223	0	E	FALSE	FALSE	FALSE	TRUE	none	none	none	ARACNe-GTEx	-	-
ADNP2	TNKS2	0	E	FALSE	FALSE	FALSE	TRUE	none	none	none	ARACNe-GTEx	-	-
ADNP2	TOX4	0	E	FALSE	FALSE	FALSE	TRUE	none	none	none	ARACNe-GTEx	-	-
ADNP2	TP53BP2	0	E	FALSE	FALSE	FALSE	TRUE	none	none	none	ARACNe-GTEx	-	-
ADNP2	TRAF6	0	E	FALSE	FALSE	FALSE	TRUE	none	none	none	ARACNe-GTEx	-	-
ADNP2	TRIM33	0	E	FALSE	FALSE	FALSE	TRUE	none	none	none	ARACNe-GTEx	-	-
ADNP2	TRIP12	0	E	FALSE	FALSE	FALSE	TRUE	none	none	none	ARACNe-GTEx	-	-
ADNP2	TRMT11	0	E	FALSE	FALSE	FALSE	TRUE	none	none	none	ARACNe-GTEx	-	-
ADNP2	TSC22D2	0	E	FALSE	FALSE	FALSE	TRUE	none	none	none	ARACNe-GTEx	-	-
ADNP2	TSTD2	0	E	FALSE	FALSE	FALSE	TRUE	none	none	none	ARACNe-GTEx	-	-
ADNP2	TUFT1	0	E	FALSE	FALSE	FALSE	TRUE	none	none	none	ARACNe-GTEx	-	-
ADNP2	TWISTNB	0	E	FALSE	FALSE	FALSE	TRUE	none	none	none	ARACNe-GTEx	-	-
ADNP2	TXLNG	0	E	FALSE	FALSE	FALSE	TRUE	none	none	none	ARACNe-GTEx	-	-
ADNP2	U2AF1	0	E	FALSE	FALSE	FALSE	TRUE	none	none	none	ARACNe-GTEx	-	-
ADNP2	UBAP2L	0	E	FALSE	FALSE	FALSE	TRUE	none	none	none	ARACNe-GTEx	-	-
ADNP2	USP14	0	E	FALSE	FALSE	FALSE	TRUE	none	none	none	ARACNe-GTEx	-	-
ADNP2	USP16	0	E	FALSE	FALSE	FALSE	TRUE	none	none	none	ARACNe-GTEx	-	-
ADNP2	USP31	0	E	FALSE	FALSE	FALSE	TRUE	none	none	none	ARACNe-GTEx	-	-
ADNP2	USP36	0	E	FALSE	FALSE	FALSE	TRUE	none	none	none	ARACNe-GTEx	-	-
ADNP2	UTP15	0	E	FALSE	FALSE	FALSE	TRUE	none	none	none	ARACNe-GTEx	-	-
ADNP2	VCPKMT	0	E	FALSE	FALSE	FALSE	TRUE	none	none	none	ARACNe-GTEx	-	-
ADNP2	WAPL	0	E	FALSE	FALSE	FALSE	TRUE	none	none	none	ARACNe-GTEx	-	-
ADNP2	WBP11	0	E	FALSE	FALSE	FALSE	TRUE	none	none	none	ARACNe-GTEx	-	-
ADNP2	WDR43	0	E	FALSE	FALSE	FALSE	TRUE	none	none	none	ARACNe-GTEx	-	-
ADNP2	WDR45B	0	E	FALSE	FALSE	FALSE	TRUE	none	none	none	ARACNe-GTEx	-	-
ADNP2	WRN	0	E	FALSE	FALSE	FALSE	TRUE	none	none	none	ARACNe-GTEx	-	-
ADNP2	WTAP	0	E	FALSE	FALSE	FALSE	TRUE	none	none	none	ARACNe-GTEx	-	-
ADNP2	XRN1	0	E	FALSE	FALSE	FALSE	TRUE	none	none	none	ARACNe-GTEx	-	-
ADNP2	YTHDC2	0	E	FALSE	FALSE	FALSE	TRUE	none	none	none	ARACNe-GTEx	-	-
ADNP2	ZBTB21	0	E	FALSE	FALSE	FALSE	TRUE	none	none	none	ARACNe-GTEx	-	-
ADNP2	ZBTB43	0	E	FALSE	FALSE	FALSE	TRUE	none	none	none	ARACNe-GTEx	-	-
ADNP2	ZFAND5	0	E	FALSE	FALSE	FALSE	TRUE	none	none	none	ARACNe-GTEx	-	-
ADNP2	ZMYM2	0	E	FALSE	FALSE	FALSE	TRUE	none	none	none	ARACNe-GTEx	-	-
ADNP2	ZNF207	0	E	FALSE	FALSE	FALSE	TRUE	none	none	none	ARACNe-GTEx	-	-
ADNP2	ZNF274	0	E	FALSE	FALSE	FALSE	TRUE	none	none	none	ARACNe-GTEx	-	-
ADNP2	ZNF280C	0	E	FALSE	FALSE	FALSE	TRUE	none	none	none	ARACNe-GTEx	-	-
ADNP2	ZNF326	0	E	FALSE	FALSE	FALSE	TRUE	none	none	none	ARACNe-GTEx	-	-
ADNP2	ZNF394	0	E	FALSE	FALSE	FALSE	TRUE	none	none	none	ARACNe-GTEx	-	-
ADNP2	ZNF432	0	E	FALSE	FALSE	FALSE	TRUE	none	none	none	ARACNe-GTEx	-	-
ADNP2	ZNF433	0	E	FALSE	FALSE	FALSE	TRUE	none	none	none	ARACNe-GTEx	-	-
ADNP2	ZNF460	0	E	FALSE	FALSE	FALSE	TRUE	none	none	none	ARACNe-GTEx	-	-
ADNP2	ZNF562	0	E	FALSE	FALSE	FALSE	TRUE	none	none	none	ARACNe-GTEx	-	-
ADNP2	ZNF587B	0	E	FALSE	FALSE	FALSE	TRUE	none	none	none	ARACNe-GTEx	-	-
ADNP2	ZNF791	0	E	FALSE	FALSE	FALSE	TRUE	none	none	none	ARACNe-GTEx	-	-
ADNP2	ZNF800	0	E	FALSE	FALSE	FALSE	TRUE	none	none	none	ARACNe-GTEx	-	-
ADNP2	ZNFX1	0	E	FALSE	FALSE	FALSE	TRUE	none	none	none	ARACNe-GTEx	-	-
ADNP2	ZSWIM6	0	E	FALSE	FALSE	FALSE	TRUE	none	none	none	ARACNe-GTEx	-	-
ADNP2	ZUFSP	0	E	FALSE	FALSE	FALSE	TRUE	none	none	none	ARACNe-GTEx	-	-
AEBP2	ABCE1	0	E	FALSE	FALSE	FALSE	TRUE	none	none	none	ARACNe-GTEx	-	-
AEBP2	ABHD13	0	E	FALSE	FALSE	FALSE	TRUE	none	none	none	ARACNe-GTEx	-	-
AEBP2	ABI1	0	E	FALSE	FALSE	FALSE	TRUE	none	none	none	ARACNe-GTEx	-	-
AEBP2	ABI2	0	E	FALSE	FALSE	FALSE	TRUE	none	none	none	ARACNe-GTEx	-	-
AEBP2	ACADS	0	E	FALSE	FALSE	FALSE	TRUE	none	none	none	ARACNe-GTEx	-	-
AEBP2	ACTR3	0	E	FALSE	FALSE	FALSE	TRUE	none	none	none	ARACNe-GTEx	-	-
AEBP2	AFF4	0	E	FALSE	FALSE	FALSE	TRUE	none	none	none	ARACNe-GTEx	-	-
AEBP2	AFTPH	0	E	FALSE	FALSE	FALSE	TRUE	none	none	none	ARACNe-GTEx	-	-
AEBP2	AGPAT2	0	E	FALSE	FALSE	FALSE	TRUE	none	none	none	ARACNe-GTEx	-	-
AEBP2	AHR	0	E	FALSE	FALSE	FALSE	TRUE	none	none	none	ARACNe-GTEx	-	-
AEBP2	AKAP11	0	E	FALSE	FALSE	FALSE	TRUE	none	none	none	ARACNe-GTEx	-	-
AEBP2	AKAP6	0	E	FALSE	FALSE	FALSE	TRUE	none	none	none	ARACNe-GTEx	-	-
AEBP2	AKT1S1	0	E	FALSE	FALSE	FALSE	TRUE	none	none	none	ARACNe-GTEx	-	-
AEBP2	ALG13	0	E	FALSE	FALSE	FALSE	TRUE	none	none	none	ARACNe-GTEx	-	-
AEBP2	ALMS1	0	E	FALSE	FALSE	FALSE	TRUE	none	none	none	ARACNe-GTEx	-	-
AEBP2	AMD1	0	E	FALSE	FALSE	FALSE	TRUE	none	none	none	ARACNe-GTEx	-	-
AEBP2	ANAPC10	0	E	FALSE	FALSE	FALSE	TRUE	none	none	none	ARACNe-GTEx	-	-
AEBP2	ANKRD13C	0	E	FALSE	FALSE	FALSE	TRUE	none	none	none	ARACNe-GTEx	-	-
AEBP2	ANKRD46	0	E	FALSE	FALSE	FALSE	TRUE	none	none	none	ARACNe-GTEx	-	-
AEBP2	ANKS1B	0	E	FALSE	FALSE	FALSE	TRUE	none	none	none	ARACNe-GTEx	-	-
AEBP2	ANP32E	0	E	FALSE	FALSE	FALSE	TRUE	none	none	none	ARACNe-GTEx	-	-
AEBP2	ANTXR1	0	E	FALSE	FALSE	FALSE	TRUE	none	none	none	ARACNe-GTEx	-	-
AEBP2	AP1AR	0	E	FALSE	FALSE	FALSE	TRUE	none	none	none	ARACNe-GTEx	-	-
AEBP2	AP1B1	0	E	FALSE	FALSE	FALSE	TRUE	none	none	none	ARACNe-GTEx	-	-
AEBP2	AP3S1	0	E	FALSE	FALSE	FALSE	TRUE	none	none	none	ARACNe-GTEx	-	-
AEBP2	AP4S1	0	E	FALSE	FALSE	FALSE	TRUE	none	none	none	ARACNe-GTEx	-	-
AEBP2	APMAP	0	E	FALSE	FALSE	FALSE	TRUE	none	none	none	ARACNe-GTEx	-	-
AEBP2	APPBP2	0	E	FALSE	FALSE	FALSE	TRUE	none	none	none	ARACNe-GTEx	-	-
AEBP2	APPL1	0	E	FALSE	FALSE	FALSE	TRUE	none	none	none	ARACNe-GTEx	-	-
AEBP2	ARAP2	0	E	FALSE	FALSE	FALSE	TRUE	none	none	none	ARACNe-GTEx	-	-
AEBP2	ARFIP1	0	E	FALSE	FALSE	FALSE	TRUE	none	none	none	ARACNe-GTEx	-	-
AEBP2	ARHGAP42	0	E	FALSE	FALSE	FALSE	TRUE	none	none	none	ARACNe-GTEx	-	-
AEBP2	ARHGAP5	0	E	FALSE	FALSE	FALSE	TRUE	none	none	none	ARACNe-GTEx	-	-
AEBP2	ARHGEF12	0	E	FALSE	FALSE	FALSE	TRUE	none	none	none	ARACNe-GTEx	-	-
AEBP2	ARHGEF3	0	E	FALSE	FALSE	FALSE	TRUE	none	none	none	ARACNe-GTEx	-	-
AEBP2	ARID1B	0	E	FALSE	FALSE	FALSE	TRUE	none	none	none	ARACNe-GTEx	-	-
AEBP2	ARID4B	0	E	FALSE	FALSE	FALSE	TRUE	none	none	none	ARACNe-GTEx	-	-
AEBP2	ARIH1	0	E	FALSE	FALSE	FALSE	TRUE	none	none	none	ARACNe-GTEx	-	-
AEBP2	ARL13B	0	E	FALSE	FALSE	FALSE	TRUE	none	none	none	ARACNe-GTEx	-	-
AEBP2	ARL5A	0	E	FALSE	FALSE	FALSE	TRUE	none	none	none	ARACNe-GTEx	-	-
AEBP2	ARL5B	0	E	FALSE	FALSE	FALSE	TRUE	none	none	none	ARACNe-GTEx	-	-
AEBP2	ARL8B	0	E	FALSE	FALSE	FALSE	TRUE	none	none	none	ARACNe-GTEx	-	-
AEBP2	ARMC10	0	E	FALSE	FALSE	FALSE	TRUE	none	none	none	ARACNe-GTEx	-	-
AEBP2	ARMCX1	0	E	FALSE	FALSE	FALSE	TRUE	none	none	none	ARACNe-GTEx	-	-
AEBP2	ATAD1	0	E	FALSE	FALSE	FALSE	TRUE	none	none	none	ARACNe-GTEx	-	-
AEBP2	ATAD2B	0	E	FALSE	FALSE	FALSE	TRUE	none	none	none	ARACNe-GTEx	-	-
AEBP2	ATF1	0	E	FALSE	FALSE	FALSE	TRUE	none	none	none	ARACNe-GTEx	-	-
AEBP2	ATF2	0	E	FALSE	FALSE	FALSE	TRUE	none	none	none	ARACNe-GTEx	-	-
AEBP2	ATF3	0	E	FALSE	FALSE	FALSE	TRUE	none	none	none	ARACNe-GTEx	-	-
AEBP2	ATF7	0	E	FALSE	FALSE	FALSE	TRUE	none	none	none	ARACNe-GTEx	-	-
AEBP2	ATL2	0	E	FALSE	FALSE	FALSE	TRUE	none	none	none	ARACNe-GTEx	-	-
AEBP2	ATP2B1	0	E	FALSE	FALSE	FALSE	TRUE	none	none	none	ARACNe-GTEx	-	-
AEBP2	ATP7A	0	E	FALSE	FALSE	FALSE	TRUE	none	none	none	ARACNe-GTEx	-	-
AEBP2	ATP8B1	0	E	FALSE	FALSE	FALSE	TRUE	none	none	none	ARACNe-GTEx	-	-
AEBP2	ATRX	0	E	FALSE	FALSE	FALSE	TRUE	none	none	none	ARACNe-GTEx	-	-
AEBP2	ATXN1	0	E	FALSE	FALSE	FALSE	TRUE	none	none	none	ARACNe-GTEx	-	-
AEBP2	ATXN7	0	E	FALSE	FALSE	FALSE	TRUE	none	none	none	ARACNe-GTEx	-	-
AEBP2	B3GAT2	0	E	FALSE	FALSE	FALSE	TRUE	none	none	none	ARACNe-GTEx	-	-
AEBP2	BACH1	0	E	FALSE	FALSE	FALSE	TRUE	none	none	none	ARACNe-GTEx	-	-
AEBP2	BAG4	0	E	FALSE	FALSE	FALSE	TRUE	none	none	none	ARACNe-GTEx	-	-
AEBP2	BBS9	0	E	FALSE	FALSE	FALSE	TRUE	none	none	none	ARACNe-GTEx	-	-
AEBP2	BBX	0	E	FALSE	FALSE	FALSE	TRUE	none	none	none	ARACNe-GTEx	-	-
AEBP2	BCAP31	0	E	FALSE	FALSE	FALSE	TRUE	none	none	none	ARACNe-GTEx	-	-
AEBP2	BCLAF1	0	E	FALSE	FALSE	FALSE	TRUE	none	none	none	ARACNe-GTEx	-	-
AEBP2	BDP1	0	E	FALSE	FALSE	FALSE	TRUE	none	none	none	ARACNe-GTEx	-	-
AEBP2	BICD1	0	E	FALSE	FALSE	FALSE	TRUE	none	none	none	ARACNe-GTEx	-	-
AEBP2	BICD2	0	E	FALSE	FALSE	FALSE	TRUE	none	none	none	ARACNe-GTEx	-	-
AEBP2	BIRC2	0	E	FALSE	FALSE	FALSE	TRUE	none	none	none	ARACNe-GTEx	-	-
AEBP2	BLOC1S5	0	E	FALSE	FALSE	FALSE	TRUE	none	none	none	ARACNe-GTEx	-	-
AEBP2	BLOC1S6	0	E	FALSE	FALSE	FALSE	TRUE	none	none	none	ARACNe-GTEx	-	-
AEBP2	BLZF1	0	E	FALSE	FALSE	FALSE	TRUE	none	none	none	ARACNe-GTEx	-	-
AEBP2	BMI1	0	E	FALSE	FALSE	FALSE	TRUE	none	none	none	ARACNe-GTEx	-	-
AEBP2	BMPR1A	0	E	FALSE	FALSE	FALSE	TRUE	none	none	none	ARACNe-GTEx	-	-
AEBP2	BMPR2	0	E	FALSE	FALSE	FALSE	TRUE	none	none	none	ARACNe-GTEx	-	-
AEBP2	BMT2	0	E	FALSE	FALSE	FALSE	TRUE	none	none	none	ARACNe-GTEx	-	-
AEBP2	BRAF	0	E	FALSE	FALSE	FALSE	TRUE	none	none	none	ARACNe-GTEx	-	-
AEBP2	BRMS1L	0	E	FALSE	FALSE	FALSE	TRUE	none	none	none	ARACNe-GTEx	-	-
AEBP2	BTN2A1	0	E	FALSE	FALSE	FALSE	TRUE	none	none	none	ARACNe-GTEx	-	-
AEBP2	C11orf58	0	E	FALSE	FALSE	FALSE	TRUE	none	none	none	ARACNe-GTEx	-	-
AEBP2	C12orf29	0	E	FALSE	FALSE	FALSE	TRUE	none	none	none	ARACNe-GTEx	-	-
AEBP2	C16orf72	0	E	FALSE	FALSE	FALSE	TRUE	none	none	none	ARACNe-GTEx	-	-
AEBP2	C18orf25	0	E	FALSE	FALSE	FALSE	TRUE	none	none	none	ARACNe-GTEx	-	-
AEBP2	C1orf198	0	E	FALSE	FALSE	FALSE	TRUE	none	none	none	ARACNe-GTEx	-	-
AEBP2	C1orf52	0	E	FALSE	FALSE	FALSE	TRUE	none	none	none	ARACNe-GTEx	-	-
AEBP2	C1QB	0	E	FALSE	FALSE	FALSE	TRUE	none	none	none	ARACNe-GTEx	-	-
AEBP2	C21orf91	0	E	FALSE	FALSE	FALSE	TRUE	none	none	none	ARACNe-GTEx	-	-
AEBP2	C3orf58	0	E	FALSE	FALSE	FALSE	TRUE	none	none	none	ARACNe-GTEx	-	-
AEBP2	C4orf3	0	E	FALSE	FALSE	FALSE	TRUE	none	none	none	ARACNe-GTEx	-	-
AEBP2	C5orf24	0	E	FALSE	FALSE	FALSE	TRUE	none	none	none	ARACNe-GTEx	-	-
AEBP2	C5orf42	0	E	FALSE	FALSE	FALSE	TRUE	none	none	none	ARACNe-GTEx	-	-
AEBP2	C8orf4	0	E	FALSE	FALSE	FALSE	TRUE	none	none	none	ARACNe-GTEx	-	-
AEBP2	CAAP1	0	E	FALSE	FALSE	FALSE	TRUE	none	none	none	ARACNe-GTEx	-	-
AEBP2	CADM1	0	E	FALSE	FALSE	FALSE	TRUE	none	none	none	ARACNe-GTEx	-	-
AEBP2	CAMLG	0	E	FALSE	FALSE	FALSE	TRUE	none	none	none	ARACNe-GTEx	-	-
AEBP2	CAMSAP2	0	E	FALSE	FALSE	FALSE	TRUE	none	none	none	ARACNe-GTEx	-	-
AEBP2	CASC4	0	E	FALSE	FALSE	FALSE	TRUE	none	none	none	ARACNe-GTEx	-	-
AEBP2	CASD1	0	E	FALSE	FALSE	FALSE	TRUE	none	none	none	ARACNe-GTEx	-	-
AEBP2	CBFB	0	E	FALSE	FALSE	FALSE	TRUE	none	none	none	ARACNe-GTEx	-	-
AEBP2	CCDC59	0	E	FALSE	FALSE	FALSE	TRUE	none	none	none	ARACNe-GTEx	-	-
AEBP2	CCDC6	0	E	FALSE	FALSE	FALSE	TRUE	none	none	none	ARACNe-GTEx	-	-
AEBP2	CCNI	0	E	FALSE	FALSE	FALSE	TRUE	none	none	none	ARACNe-GTEx	-	-
AEBP2	CCP110	0	E	FALSE	FALSE	FALSE	TRUE	none	none	none	ARACNe-GTEx	-	-
AEBP2	CCSER2	0	E	FALSE	FALSE	FALSE	TRUE	none	none	none	ARACNe-GTEx	-	-
AEBP2	CD163	0	E	FALSE	FALSE	FALSE	TRUE	none	none	none	ARACNe-GTEx	-	-
AEBP2	CD2AP	0	E	FALSE	FALSE	FALSE	TRUE	none	none	none	ARACNe-GTEx	-	-
AEBP2	CDC73	0	E	FALSE	FALSE	FALSE	TRUE	none	none	none	ARACNe-GTEx	-	-
AEBP2	CDK14	0	E	FALSE	FALSE	FALSE	TRUE	none	none	none	ARACNe-GTEx	-	-
AEBP2	CDK17	0	E	FALSE	FALSE	FALSE	TRUE	none	none	none	ARACNe-GTEx	-	-
AEBP2	CDKAL1	0	E	FALSE	FALSE	FALSE	TRUE	none	none	none	ARACNe-GTEx	-	-
AEBP2	CDKN1B	0	E	FALSE	FALSE	FALSE	TRUE	none	none	none	ARACNe-GTEx	-	-
AEBP2	CDR2	0	E	FALSE	FALSE	FALSE	TRUE	none	none	none	ARACNe-GTEx	-	-
AEBP2	CENPC	0	E	FALSE	FALSE	FALSE	TRUE	none	none	none	ARACNe-GTEx	-	-
AEBP2	CEP112	0	E	FALSE	FALSE	FALSE	TRUE	none	none	none	ARACNe-GTEx	-	-
AEBP2	CEP128	0	E	FALSE	FALSE	FALSE	TRUE	none	none	none	ARACNe-GTEx	-	-
AEBP2	CEP170	0	E	FALSE	FALSE	FALSE	TRUE	none	none	none	ARACNe-GTEx	-	-
AEBP2	CEP85L	0	E	FALSE	FALSE	FALSE	TRUE	none	none	none	ARACNe-GTEx	-	-
AEBP2	CFAP97	0	E	FALSE	FALSE	FALSE	TRUE	none	none	none	ARACNe-GTEx	-	-
AEBP2	CFP	0	E	FALSE	FALSE	FALSE	TRUE	none	none	none	ARACNe-GTEx	-	-
AEBP2	CGGBP1	0	E	FALSE	FALSE	FALSE	TRUE	none	none	none	ARACNe-GTEx	-	-
AEBP2	CHIC1	0	E	FALSE	FALSE	FALSE	TRUE	none	none	none	ARACNe-GTEx	-	-
AEBP2	CHML	0	E	FALSE	FALSE	FALSE	TRUE	none	none	none	ARACNe-GTEx	-	-
AEBP2	CHMP2B	0	E	FALSE	FALSE	FALSE	TRUE	none	none	none	ARACNe-GTEx	-	-
AEBP2	CHORDC1	0	E	FALSE	FALSE	FALSE	TRUE	none	none	none	ARACNe-GTEx	-	-
AEBP2	CLDND1	0	E	FALSE	FALSE	FALSE	TRUE	none	none	none	ARACNe-GTEx	-	-
AEBP2	CLEC2B	0	E	FALSE	FALSE	FALSE	TRUE	none	none	none	ARACNe-GTEx	-	-
AEBP2	CLUH	0	E	FALSE	FALSE	FALSE	TRUE	none	none	none	ARACNe-GTEx	-	-
AEBP2	CNBP	0	E	FALSE	FALSE	FALSE	TRUE	none	none	none	ARACNe-GTEx	-	-
AEBP2	CNOT2	0	E	FALSE	FALSE	FALSE	TRUE	none	none	none	ARACNe-GTEx	-	-
AEBP2	CNOT4	0	E	FALSE	FALSE	FALSE	TRUE	none	none	none	ARACNe-GTEx	-	-
AEBP2	CNOT6	0	E	FALSE	FALSE	FALSE	TRUE	none	none	none	ARACNe-GTEx	-	-
AEBP2	CNOT6L	0	E	FALSE	FALSE	FALSE	TRUE	none	none	none	ARACNe-GTEx	-	-
AEBP2	CNOT7	0	E	FALSE	FALSE	FALSE	TRUE	none	none	none	ARACNe-GTEx	-	-
AEBP2	CNRIP1	0	E	FALSE	FALSE	FALSE	TRUE	none	none	none	ARACNe-GTEx	-	-
AEBP2	COMMD10	0	E	FALSE	FALSE	FALSE	TRUE	none	none	none	ARACNe-GTEx	-	-
AEBP2	COPS2	0	E	FALSE	FALSE	FALSE	TRUE	none	none	none	ARACNe-GTEx	-	-
AEBP2	CPEB3	0	E	FALSE	FALSE	FALSE	TRUE	none	none	none	ARACNe-GTEx	-	-
AEBP2	CPED1	0	E	FALSE	FALSE	FALSE	TRUE	none	none	none	ARACNe-GTEx	-	-
AEBP2	CREB1	0	E	FALSE	FALSE	FALSE	TRUE	none	none	none	ARACNe-GTEx	-	-
AEBP2	CRYZL1	0	E	FALSE	FALSE	FALSE	TRUE	none	none	none	ARACNe-GTEx	-	-
AEBP2	CSNK1G3	0	E	FALSE	FALSE	FALSE	TRUE	none	none	none	ARACNe-GTEx	-	-
AEBP2	CTDSPL2	0	E	FALSE	FALSE	FALSE	TRUE	none	none	none	ARACNe-GTEx	-	-
AEBP2	CTNNAL1	0	E	FALSE	FALSE	FALSE	TRUE	none	none	none	ARACNe-GTEx	-	-
AEBP2	CTTNBP2NL	0	E	FALSE	FALSE	FALSE	TRUE	none	none	none	ARACNe-GTEx	-	-
AEBP2	CWC22	0	E	FALSE	FALSE	FALSE	TRUE	none	none	none	ARACNe-GTEx	-	-
AEBP2	CWC27	0	E	FALSE	FALSE	FALSE	TRUE	none	none	none	ARACNe-GTEx	-	-
AEBP2	CWF19L2	0	E	FALSE	FALSE	FALSE	TRUE	none	none	none	ARACNe-GTEx	-	-
AEBP2	CYLD	0	E	FALSE	FALSE	FALSE	TRUE	none	none	none	ARACNe-GTEx	-	-
AEBP2	DAAM1	0	E	FALSE	FALSE	FALSE	TRUE	none	none	none	ARACNe-GTEx	-	-
AEBP2	DARS	0	E	FALSE	FALSE	FALSE	TRUE	none	none	none	ARACNe-GTEx	-	-
AEBP2	DCK	0	E	FALSE	FALSE	FALSE	TRUE	none	none	none	ARACNe-GTEx	-	-
AEBP2	DCUN1D4	0	E	FALSE	FALSE	FALSE	TRUE	none	none	none	ARACNe-GTEx	-	-
AEBP2	DEK	0	E	FALSE	FALSE	FALSE	TRUE	none	none	none	ARACNe-GTEx	-	-
AEBP2	DENND5B	0	E	FALSE	FALSE	FALSE	TRUE	none	none	none	ARACNe-GTEx	-	-
AEBP2	DENND6A	0	E	FALSE	FALSE	FALSE	TRUE	none	none	none	ARACNe-GTEx	-	-
AEBP2	DGKH	0	E	FALSE	FALSE	FALSE	TRUE	none	none	none	ARACNe-GTEx	-	-
AEBP2	DNAJB4	0	E	FALSE	FALSE	FALSE	TRUE	none	none	none	ARACNe-GTEx	-	-
AEBP2	DNAJB6	0	E	FALSE	FALSE	FALSE	TRUE	none	none	none	ARACNe-GTEx	-	-
AEBP2	DPH6	0	E	FALSE	FALSE	FALSE	TRUE	none	none	none	ARACNe-GTEx	-	-
AEBP2	DPM1	0	E	FALSE	FALSE	FALSE	TRUE	none	none	none	ARACNe-GTEx	-	-
AEBP2	DPP3	0	E	FALSE	FALSE	FALSE	TRUE	none	none	none	ARACNe-GTEx	-	-
AEBP2	DPY19L4	0	E	FALSE	FALSE	FALSE	TRUE	none	none	none	ARACNe-GTEx	-	-
AEBP2	DTWD1	0	E	FALSE	FALSE	FALSE	TRUE	none	none	none	ARACNe-GTEx	-	-
AEBP2	DUSP11	0	E	FALSE	FALSE	FALSE	TRUE	none	none	none	ARACNe-GTEx	-	-
AEBP2	DYNC1LI1	0	E	FALSE	FALSE	FALSE	TRUE	none	none	none	ARACNe-GTEx	-	-
AEBP2	DYNLT3	0	E	FALSE	FALSE	FALSE	TRUE	none	none	none	ARACNe-GTEx	-	-
AEBP2	DYRK1A	0	E	FALSE	FALSE	FALSE	TRUE	none	none	none	ARACNe-GTEx	-	-
AEBP2	DZIP1	0	E	FALSE	FALSE	FALSE	TRUE	none	none	none	ARACNe-GTEx	-	-
AEBP2	ECD	0	E	FALSE	FALSE	FALSE	TRUE	none	none	none	ARACNe-GTEx	-	-
AEBP2	EEA1	0	E	FALSE	FALSE	FALSE	TRUE	none	none	none	ARACNe-GTEx	-	-
AEBP2	EFR3A	0	E	FALSE	FALSE	FALSE	TRUE	none	none	none	ARACNe-GTEx	-	-
AEBP2	EGLN1	0	E	FALSE	FALSE	FALSE	TRUE	none	none	none	ARACNe-GTEx	-	-
AEBP2	EIF3E	0	E	FALSE	FALSE	FALSE	TRUE	none	none	none	ARACNe-GTEx	-	-
AEBP2	EIF4A2	0	E	FALSE	FALSE	FALSE	TRUE	none	none	none	ARACNe-GTEx	-	-
AEBP2	EIF4E	0	E	FALSE	FALSE	FALSE	TRUE	none	none	none	ARACNe-GTEx	-	-
AEBP2	ELF1	0	E	FALSE	FALSE	FALSE	TRUE	none	none	none	ARACNe-GTEx	-	-
AEBP2	ELK4	0	E	FALSE	FALSE	FALSE	TRUE	none	none	none	ARACNe-GTEx	-	-
AEBP2	EMC2	0	E	FALSE	FALSE	FALSE	TRUE	none	none	none	ARACNe-GTEx	-	-
AEBP2	ENAH	0	E	FALSE	FALSE	FALSE	TRUE	none	none	none	ARACNe-GTEx	-	-
AEBP2	EPC1	0	E	FALSE	FALSE	FALSE	TRUE	none	none	none	ARACNe-GTEx	-	-
AEBP2	EPC2	0	E	FALSE	FALSE	FALSE	TRUE	none	none	none	ARACNe-GTEx	-	-
AEBP2	ESCO1	0	E	FALSE	FALSE	FALSE	TRUE	none	none	none	ARACNe-GTEx	-	-
AEBP2	ESYT2	0	E	FALSE	FALSE	FALSE	TRUE	none	none	none	ARACNe-GTEx	-	-
AEBP2	EXOC5	0	E	FALSE	FALSE	FALSE	TRUE	none	none	none	ARACNe-GTEx	-	-
AEBP2	EXOC6B	0	E	FALSE	FALSE	FALSE	TRUE	none	none	none	ARACNe-GTEx	-	-
AEBP2	FAH	0	E	FALSE	FALSE	FALSE	TRUE	none	none	none	ARACNe-GTEx	-	-
AEBP2	FAM122A	0	E	FALSE	FALSE	FALSE	TRUE	none	none	none	ARACNe-GTEx	-	-
AEBP2	FAM126A	0	E	FALSE	FALSE	FALSE	TRUE	none	none	none	ARACNe-GTEx	-	-
AEBP2	FAM133B	0	E	FALSE	FALSE	FALSE	TRUE	none	none	none	ARACNe-GTEx	-	-
AEBP2	FAM13B	0	E	FALSE	FALSE	FALSE	TRUE	none	none	none	ARACNe-GTEx	-	-
AEBP2	FAM172A	0	E	FALSE	FALSE	FALSE	TRUE	none	none	none	ARACNe-GTEx	-	-
AEBP2	FAM188A	0	E	FALSE	FALSE	FALSE	TRUE	none	none	none	ARACNe-GTEx	-	-
AEBP2	FAM199X	0	E	FALSE	FALSE	FALSE	TRUE	none	none	none	ARACNe-GTEx	-	-
AEBP2	FAM220A	0	E	FALSE	FALSE	FALSE	TRUE	none	none	none	ARACNe-GTEx	-	-
AEBP2	FAM227B	0	E	FALSE	FALSE	FALSE	TRUE	none	none	none	ARACNe-GTEx	-	-
AEBP2	FAM60A	0	E	FALSE	FALSE	FALSE	TRUE	none	none	none	ARACNe-GTEx	-	-
AEBP2	FAM63B	0	E	FALSE	FALSE	FALSE	TRUE	none	none	none	ARACNe-GTEx	-	-
AEBP2	FAM8A1	0	E	FALSE	FALSE	FALSE	TRUE	none	none	none	ARACNe-GTEx	-	-
AEBP2	FAM91A1	0	E	FALSE	FALSE	FALSE	TRUE	none	none	none	ARACNe-GTEx	-	-
AEBP2	FAR1	0	E	FALSE	FALSE	FALSE	TRUE	none	none	none	ARACNe-GTEx	-	-
AEBP2	FAS	0	E	FALSE	FALSE	FALSE	TRUE	none	none	none	ARACNe-GTEx	-	-
AEBP2	FASN	0	E	FALSE	FALSE	FALSE	TRUE	none	none	none	ARACNe-GTEx	-	-
AEBP2	FBXL3	0	E	FALSE	FALSE	FALSE	TRUE	none	none	none	ARACNe-GTEx	-	-
AEBP2	FBXO28	0	E	FALSE	FALSE	FALSE	TRUE	none	none	none	ARACNe-GTEx	-	-
AEBP2	FBXO34	0	E	FALSE	FALSE	FALSE	TRUE	none	none	none	ARACNe-GTEx	-	-
AEBP2	FGF7	0	E	FALSE	FALSE	FALSE	TRUE	none	none	none	ARACNe-GTEx	-	-
AEBP2	FGFR1OP2	0	E	FALSE	FALSE	FALSE	TRUE	none	none	none	ARACNe-GTEx	-	-
AEBP2	FMR1	0	E	FALSE	FALSE	FALSE	TRUE	none	none	none	ARACNe-GTEx	-	-
AEBP2	FNDC3A	0	E	FALSE	FALSE	FALSE	TRUE	none	none	none	ARACNe-GTEx	-	-
AEBP2	FOXP1	0	E	FALSE	FALSE	FALSE	TRUE	none	none	none	ARACNe-GTEx	-	-
AEBP2	FRS2	0	E	FALSE	FALSE	FALSE	TRUE	none	none	none	ARACNe-GTEx	-	-
AEBP2	FXR1	0	E	FALSE	FALSE	FALSE	TRUE	none	none	none	ARACNe-GTEx	-	-
AEBP2	FYTTD1	0	E	FALSE	FALSE	FALSE	TRUE	none	none	none	ARACNe-GTEx	-	-
AEBP2	FZD3	0	E	FALSE	FALSE	FALSE	TRUE	none	none	none	ARACNe-GTEx	-	-
AEBP2	FZD6	0	E	FALSE	FALSE	FALSE	TRUE	none	none	none	ARACNe-GTEx	-	-
AEBP2	G2E3	0	E	FALSE	FALSE	FALSE	TRUE	none	none	none	ARACNe-GTEx	-	-
AEBP2	G6PC3	0	E	FALSE	FALSE	FALSE	TRUE	none	none	none	ARACNe-GTEx	-	-
AEBP2	G6PD	0	E	FALSE	FALSE	FALSE	TRUE	none	none	none	ARACNe-GTEx	-	-
AEBP2	GAB1	0	E	FALSE	FALSE	FALSE	TRUE	none	none	none	ARACNe-GTEx	-	-
AEBP2	GABARAPL2	0	E	FALSE	FALSE	FALSE	TRUE	none	none	none	ARACNe-GTEx	-	-
AEBP2	GABPA	0	E	FALSE	FALSE	FALSE	TRUE	none	none	none	ARACNe-GTEx	-	-
AEBP2	GDAP2	0	E	FALSE	FALSE	FALSE	TRUE	none	none	none	ARACNe-GTEx	-	-
AEBP2	GEM	0	E	FALSE	FALSE	FALSE	TRUE	none	none	none	ARACNe-GTEx	-	-
AEBP2	GGPS1	0	E	FALSE	FALSE	FALSE	TRUE	none	none	none	ARACNe-GTEx	-	-
AEBP2	GKAP1	0	E	FALSE	FALSE	FALSE	TRUE	none	none	none	ARACNe-GTEx	-	-
AEBP2	GLS	0	E	FALSE	FALSE	FALSE	TRUE	none	none	none	ARACNe-GTEx	-	-
AEBP2	GMFB	0	E	FALSE	FALSE	FALSE	TRUE	none	none	none	ARACNe-GTEx	-	-
AEBP2	GMPS	0	E	FALSE	FALSE	FALSE	TRUE	none	none	none	ARACNe-GTEx	-	-
AEBP2	GNA13	0	E	FALSE	FALSE	FALSE	TRUE	none	none	none	ARACNe-GTEx	-	-
AEBP2	GNG12	0	E	FALSE	FALSE	FALSE	TRUE	none	none	none	ARACNe-GTEx	-	-
AEBP2	GOLPH3	0	E	FALSE	FALSE	FALSE	TRUE	none	none	none	ARACNe-GTEx	-	-
AEBP2	GPATCH2	0	E	FALSE	FALSE	FALSE	TRUE	none	none	none	ARACNe-GTEx	-	-
AEBP2	GPBP1	0	E	FALSE	FALSE	FALSE	TRUE	none	none	none	ARACNe-GTEx	-	-
AEBP2	GPD1	0	E	FALSE	FALSE	FALSE	TRUE	none	none	none	ARACNe-GTEx	-	-
AEBP2	GPT	0	E	FALSE	FALSE	FALSE	TRUE	none	none	none	ARACNe-GTEx	-	-
AEBP2	GPX1	0	E	FALSE	FALSE	FALSE	TRUE	none	none	none	ARACNe-GTEx	-	-
AEBP2	GRINA	0	E	FALSE	FALSE	FALSE	TRUE	none	none	none	ARACNe-GTEx	-	-
AEBP2	GTF2F2	0	E	FALSE	FALSE	FALSE	TRUE	none	none	none	ARACNe-GTEx	-	-
AEBP2	GUCY1B3	0	E	FALSE	FALSE	FALSE	TRUE	none	none	none	ARACNe-GTEx	-	-
AEBP2	GULP1	0	E	FALSE	FALSE	FALSE	TRUE	none	none	none	ARACNe-GTEx	-	-
AEBP2	H3F3A	0	E	FALSE	FALSE	FALSE	TRUE	none	none	none	ARACNe-GTEx	-	-
AEBP2	HACE1	0	E	FALSE	FALSE	FALSE	TRUE	none	none	none	ARACNe-GTEx	-	-
AEBP2	HDX	0	E	FALSE	FALSE	FALSE	TRUE	none	none	none	ARACNe-GTEx	-	-
AEBP2	HECA	0	E	FALSE	FALSE	FALSE	TRUE	none	none	none	ARACNe-GTEx	-	-
AEBP2	HES1	0	E	FALSE	FALSE	FALSE	TRUE	none	none	none	ARACNe-GTEx	-	-
AEBP2	HMGB1	0	E	FALSE	FALSE	FALSE	TRUE	none	none	none	ARACNe-GTEx	-	-
AEBP2	HMGN1	0	E	FALSE	FALSE	FALSE	TRUE	none	none	none	ARACNe-GTEx	-	-
AEBP2	HNRNPA3	0	E	FALSE	FALSE	FALSE	TRUE	none	none	none	ARACNe-GTEx	-	-
AEBP2	HNRNPC	0	E	FALSE	FALSE	FALSE	TRUE	none	none	none	ARACNe-GTEx	-	-
AEBP2	HNRNPD	0	E	FALSE	FALSE	FALSE	TRUE	none	none	none	ARACNe-GTEx	-	-
AEBP2	HNRNPH3	0	E	FALSE	FALSE	FALSE	TRUE	none	none	none	ARACNe-GTEx	-	-
AEBP2	HNRNPLL	0	E	FALSE	FALSE	FALSE	TRUE	none	none	none	ARACNe-GTEx	-	-
AEBP2	HNRNPR	0	E	FALSE	FALSE	FALSE	TRUE	none	none	none	ARACNe-GTEx	-	-
AEBP2	HOOK3	0	E	FALSE	FALSE	FALSE	TRUE	none	none	none	ARACNe-GTEx	-	-
AEBP2	HSPA4L	0	E	FALSE	FALSE	FALSE	TRUE	none	none	none	ARACNe-GTEx	-	-
AEBP2	HUS1	0	E	FALSE	FALSE	FALSE	TRUE	none	none	none	ARACNe-GTEx	-	-
AEBP2	ICE2	0	E	FALSE	FALSE	FALSE	TRUE	none	none	none	ARACNe-GTEx	-	-
AEBP2	IDS	0	E	FALSE	FALSE	FALSE	TRUE	none	none	none	ARACNe-GTEx	-	-
AEBP2	IFRD1	0	E	FALSE	FALSE	FALSE	TRUE	none	none	none	ARACNe-GTEx	-	-
AEBP2	IMMP2L	0	E	FALSE	FALSE	FALSE	TRUE	none	none	none	ARACNe-GTEx	-	-
AEBP2	INPP4B	0	E	FALSE	FALSE	FALSE	TRUE	none	none	none	ARACNe-GTEx	-	-
AEBP2	INTS6	0	E	FALSE	FALSE	FALSE	TRUE	none	none	none	ARACNe-GTEx	-	-
AEBP2	IRF2BP2	0	E	FALSE	FALSE	FALSE	TRUE	none	none	none	ARACNe-GTEx	-	-
AEBP2	ITCH	0	E	FALSE	FALSE	FALSE	TRUE	none	none	none	ARACNe-GTEx	-	-
AEBP2	ITGAV	0	E	FALSE	FALSE	FALSE	TRUE	none	none	none	ARACNe-GTEx	-	-
AEBP2	ITM2B	0	E	FALSE	FALSE	FALSE	TRUE	none	none	none	ARACNe-GTEx	-	-
AEBP2	JAZF1	0	E	FALSE	FALSE	FALSE	TRUE	none	none	none	ARACNe-GTEx	-	-
AEBP2	KAT6A	0	E	FALSE	FALSE	FALSE	TRUE	none	none	none	ARACNe-GTEx	-	-
AEBP2	KAT7	0	E	FALSE	FALSE	FALSE	TRUE	none	none	none	ARACNe-GTEx	-	-
AEBP2	KATNAL1	0	E	FALSE	FALSE	FALSE	TRUE	none	none	none	ARACNe-GTEx	-	-
AEBP2	KBTBD2	0	E	FALSE	FALSE	FALSE	TRUE	none	none	none	ARACNe-GTEx	-	-
AEBP2	KHDRBS1	0	E	FALSE	FALSE	FALSE	TRUE	none	none	none	ARACNe-GTEx	-	-
AEBP2	KIAA1586	0	E	FALSE	FALSE	FALSE	TRUE	none	none	none	ARACNe-GTEx	-	-
AEBP2	KIAA2022	0	E	FALSE	FALSE	FALSE	TRUE	none	none	none	ARACNe-GTEx	-	-
AEBP2	KIAA2026	0	E	FALSE	FALSE	FALSE	TRUE	none	none	none	ARACNe-GTEx	-	-
AEBP2	KIF27	0	E	FALSE	FALSE	FALSE	TRUE	none	none	none	ARACNe-GTEx	-	-
AEBP2	KIF5B	0	E	FALSE	FALSE	FALSE	TRUE	none	none	none	ARACNe-GTEx	-	-
AEBP2	KLHL20	0	E	FALSE	FALSE	FALSE	TRUE	none	none	none	ARACNe-GTEx	-	-
AEBP2	KLHL28	0	E	FALSE	FALSE	FALSE	TRUE	none	none	none	ARACNe-GTEx	-	-
AEBP2	KMT2A	0	E	FALSE	FALSE	FALSE	TRUE	none	none	none	ARACNe-GTEx	-	-
AEBP2	KMT2E	0	E	FALSE	FALSE	FALSE	TRUE	none	none	none	ARACNe-GTEx	-	-
AEBP2	KPNA4	0	E	FALSE	FALSE	FALSE	TRUE	none	none	none	ARACNe-GTEx	-	-
AEBP2	KPNA5	0	E	FALSE	FALSE	FALSE	TRUE	none	none	none	ARACNe-GTEx	-	-
AEBP2	KTN1	0	E	FALSE	FALSE	FALSE	TRUE	none	none	none	ARACNe-GTEx	-	-
AEBP2	LAMTOR1	0	E	FALSE	FALSE	FALSE	TRUE	none	none	none	ARACNe-GTEx	-	-
AEBP2	LAMTOR3	0	E	FALSE	FALSE	FALSE	TRUE	none	none	none	ARACNe-GTEx	-	-
AEBP2	LATS1	0	E	FALSE	FALSE	FALSE	TRUE	none	none	none	ARACNe-GTEx	-	-
AEBP2	LCA5	0	E	FALSE	FALSE	FALSE	TRUE	none	none	none	ARACNe-GTEx	-	-
AEBP2	LCORL	0	E	FALSE	FALSE	FALSE	TRUE	none	none	none	ARACNe-GTEx	-	-
AEBP2	LEPR	0	E	FALSE	FALSE	FALSE	TRUE	none	none	none	ARACNe-GTEx	-	-
AEBP2	LIX1L	0	E	FALSE	FALSE	FALSE	TRUE	none	none	none	ARACNe-GTEx	-	-
AEBP2	LMAN1	0	E	FALSE	FALSE	FALSE	TRUE	none	none	none	ARACNe-GTEx	-	-
AEBP2	LMBR1	0	E	FALSE	FALSE	FALSE	TRUE	none	none	none	ARACNe-GTEx	-	-
AEBP2	LMBRD1	0	E	FALSE	FALSE	FALSE	TRUE	none	none	none	ARACNe-GTEx	-	-
AEBP2	LRCH1	0	E	FALSE	FALSE	FALSE	TRUE	none	none	none	ARACNe-GTEx	-	-
AEBP2	LRCH2	0	E	FALSE	FALSE	FALSE	TRUE	none	none	none	ARACNe-GTEx	-	-
AEBP2	LRCH3	0	E	FALSE	FALSE	FALSE	TRUE	none	none	none	ARACNe-GTEx	-	-
AEBP2	LRP12	0	E	FALSE	FALSE	FALSE	TRUE	none	none	none	ARACNe-GTEx	-	-
AEBP2	LRRC70	0	E	FALSE	FALSE	FALSE	TRUE	none	none	none	ARACNe-GTEx	-	-
AEBP2	LSM14A	0	E	FALSE	FALSE	FALSE	TRUE	none	none	none	ARACNe-GTEx	-	-
AEBP2	MAGI3	0	E	FALSE	FALSE	FALSE	TRUE	none	none	none	ARACNe-GTEx	-	-
AEBP2	MAGOHB	0	E	FALSE	FALSE	FALSE	TRUE	none	none	none	ARACNe-GTEx	-	-
AEBP2	MALT1	0	E	FALSE	FALSE	FALSE	TRUE	none	none	none	ARACNe-GTEx	-	-
AEBP2	MAP3K7	0	E	FALSE	FALSE	FALSE	TRUE	none	none	none	ARACNe-GTEx	-	-
AEBP2	MAP4K5	0	E	FALSE	FALSE	FALSE	TRUE	none	none	none	ARACNe-GTEx	-	-
AEBP2	MAPK8	0	E	FALSE	FALSE	FALSE	TRUE	none	none	none	ARACNe-GTEx	-	-
AEBP2	MARCH7	0	E	FALSE	FALSE	FALSE	TRUE	none	none	none	ARACNe-GTEx	-	-
AEBP2	MAT2B	0	E	FALSE	FALSE	FALSE	TRUE	none	none	none	ARACNe-GTEx	-	-
AEBP2	MATR3	0	E	FALSE	FALSE	FALSE	TRUE	none	none	none	ARACNe-GTEx	-	-
AEBP2	MAX	0	E	FALSE	FALSE	FALSE	TRUE	none	none	none	ARACNe-GTEx	-	-
AEBP2	MBD2	0	E	FALSE	FALSE	FALSE	TRUE	none	none	none	ARACNe-GTEx	-	-
AEBP2	MBD5	0	E	FALSE	FALSE	FALSE	TRUE	none	none	none	ARACNe-GTEx	-	-
AEBP2	MBNL1	0	E	FALSE	FALSE	FALSE	TRUE	none	none	none	ARACNe-GTEx	-	-
AEBP2	MBNL2	0	E	FALSE	FALSE	FALSE	TRUE	none	none	none	ARACNe-GTEx	-	-
AEBP2	MCPH1	0	E	FALSE	FALSE	FALSE	TRUE	none	none	none	ARACNe-GTEx	-	-
AEBP2	MCU	0	E	FALSE	FALSE	FALSE	TRUE	none	none	none	ARACNe-GTEx	-	-
AEBP2	MDFIC	0	E	FALSE	FALSE	FALSE	TRUE	none	none	none	ARACNe-GTEx	-	-
AEBP2	MEAF6	0	E	FALSE	FALSE	FALSE	TRUE	none	none	none	ARACNe-GTEx	-	-
AEBP2	MED13	0	E	FALSE	FALSE	FALSE	TRUE	none	none	none	ARACNe-GTEx	-	-
AEBP2	MED21	0	E	FALSE	FALSE	FALSE	TRUE	none	none	none	ARACNe-GTEx	-	-
AEBP2	MED6	0	E	FALSE	FALSE	FALSE	TRUE	none	none	none	ARACNe-GTEx	-	-
AEBP2	METTL10	0	E	FALSE	FALSE	FALSE	TRUE	none	none	none	ARACNe-GTEx	-	-
AEBP2	METTL15	0	E	FALSE	FALSE	FALSE	TRUE	none	none	none	ARACNe-GTEx	-	-
AEBP2	METTL9	0	E	FALSE	FALSE	FALSE	TRUE	none	none	none	ARACNe-GTEx	-	-
AEBP2	MEX3C	0	E	FALSE	FALSE	FALSE	TRUE	none	none	none	ARACNe-GTEx	-	-
AEBP2	MGAT1	0	E	FALSE	FALSE	FALSE	TRUE	none	none	none	ARACNe-GTEx	-	-
AEBP2	MIB1	0	E	FALSE	FALSE	FALSE	TRUE	none	none	none	ARACNe-GTEx	-	-
AEBP2	MICU3	0	E	FALSE	FALSE	FALSE	TRUE	none	none	none	ARACNe-GTEx	-	-
AEBP2	MIER1	0	E	FALSE	FALSE	FALSE	TRUE	none	none	none	ARACNe-GTEx	-	-
AEBP2	MIGA1	0	E	FALSE	FALSE	FALSE	TRUE	none	none	none	ARACNe-GTEx	-	-
AEBP2	MIPOL1	0	E	FALSE	FALSE	FALSE	TRUE	none	none	none	ARACNe-GTEx	-	-
AEBP2	MLLT3	0	E	FALSE	FALSE	FALSE	TRUE	none	none	none	ARACNe-GTEx	-	-
AEBP2	MNAT1	0	E	FALSE	FALSE	FALSE	TRUE	none	none	none	ARACNe-GTEx	-	-
AEBP2	MOB1B	0	E	FALSE	FALSE	FALSE	TRUE	none	none	none	ARACNe-GTEx	-	-
AEBP2	MORC3	0	E	FALSE	FALSE	FALSE	TRUE	none	none	none	ARACNe-GTEx	-	-
AEBP2	MOSPD1	0	E	FALSE	FALSE	FALSE	TRUE	none	none	none	ARACNe-GTEx	-	-
AEBP2	MRPL42	0	E	FALSE	FALSE	FALSE	TRUE	none	none	none	ARACNe-GTEx	-	-
AEBP2	MT-ATP8	0	E	FALSE	FALSE	FALSE	TRUE	none	none	none	ARACNe-GTEx	-	-
AEBP2	MT-CO2	0	E	FALSE	FALSE	FALSE	TRUE	none	none	none	ARACNe-GTEx	-	-
AEBP2	MT-ND5	0	E	FALSE	FALSE	FALSE	TRUE	none	none	none	ARACNe-GTEx	-	-
AEBP2	MT-ND6	0	E	FALSE	FALSE	FALSE	TRUE	none	none	none	ARACNe-GTEx	-	-
AEBP2	MTAP	0	E	FALSE	FALSE	FALSE	TRUE	none	none	none	ARACNe-GTEx	-	-
AEBP2	MTF2	0	E	FALSE	FALSE	FALSE	TRUE	none	none	none	ARACNe-GTEx	-	-
AEBP2	MTMR2	0	E	FALSE	FALSE	FALSE	TRUE	none	none	none	ARACNe-GTEx	-	-
AEBP2	MTPN	0	E	FALSE	FALSE	FALSE	TRUE	none	none	none	ARACNe-GTEx	-	-
AEBP2	MYNN	0	E	FALSE	FALSE	FALSE	TRUE	none	none	none	ARACNe-GTEx	-	-
AEBP2	MYO3A	0	E	FALSE	FALSE	FALSE	TRUE	none	none	none	ARACNe-GTEx	-	-
AEBP2	MZT1	0	E	FALSE	FALSE	FALSE	TRUE	none	none	none	ARACNe-GTEx	-	-
AEBP2	NAA15	0	E	FALSE	FALSE	FALSE	TRUE	none	none	none	ARACNe-GTEx	-	-
AEBP2	NAA30	0	E	FALSE	FALSE	FALSE	TRUE	none	none	none	ARACNe-GTEx	-	-
AEBP2	NAA50	0	E	FALSE	FALSE	FALSE	TRUE	none	none	none	ARACNe-GTEx	-	-
AEBP2	NAB1	0	E	FALSE	FALSE	FALSE	TRUE	none	none	none	ARACNe-GTEx	-	-
AEBP2	NAF1	0	E	FALSE	FALSE	FALSE	TRUE	none	none	none	ARACNe-GTEx	-	-
AEBP2	NAPB	0	E	FALSE	FALSE	FALSE	TRUE	none	none	none	ARACNe-GTEx	-	-
AEBP2	NBEAL1	0	E	FALSE	FALSE	FALSE	TRUE	none	none	none	ARACNe-GTEx	-	-
AEBP2	NCK1	0	E	FALSE	FALSE	FALSE	TRUE	none	none	none	ARACNe-GTEx	-	-
AEBP2	NDE1	0	E	FALSE	FALSE	FALSE	TRUE	none	none	none	ARACNe-GTEx	-	-
AEBP2	NECAB1	0	E	FALSE	FALSE	FALSE	TRUE	none	none	none	ARACNe-GTEx	-	-
AEBP2	NECAP1	0	E	FALSE	FALSE	FALSE	TRUE	none	none	none	ARACNe-GTEx	-	-
AEBP2	NEDD1	0	E	FALSE	FALSE	FALSE	TRUE	none	none	none	ARACNe-GTEx	-	-
AEBP2	NEDD4	0	E	FALSE	FALSE	FALSE	TRUE	none	none	none	ARACNe-GTEx	-	-
AEBP2	NEK7	0	E	FALSE	FALSE	FALSE	TRUE	none	none	none	ARACNe-GTEx	-	-
AEBP2	NFE2L2	0	E	FALSE	FALSE	FALSE	TRUE	none	none	none	ARACNe-GTEx	-	-
AEBP2	NFYA	0	E	FALSE	FALSE	FALSE	TRUE	none	none	none	ARACNe-GTEx	-	-
AEBP2	NKRF	0	E	FALSE	FALSE	FALSE	TRUE	none	none	none	ARACNe-GTEx	-	-
AEBP2	NMD3	0	E	FALSE	FALSE	FALSE	TRUE	none	none	none	ARACNe-GTEx	-	-
AEBP2	NPTN	0	E	FALSE	FALSE	FALSE	TRUE	none	none	none	ARACNe-GTEx	-	-
AEBP2	NR1D2	0	E	FALSE	FALSE	FALSE	TRUE	none	none	none	ARACNe-GTEx	-	-
AEBP2	NR3C1	0	E	FALSE	FALSE	FALSE	TRUE	none	none	none	ARACNe-GTEx	-	-
AEBP2	NT5C3A	0	E	FALSE	FALSE	FALSE	TRUE	none	none	none	ARACNe-GTEx	-	-
AEBP2	NUCKS1	0	E	FALSE	FALSE	FALSE	TRUE	none	none	none	ARACNe-GTEx	-	-
AEBP2	NUDCD1	0	E	FALSE	FALSE	FALSE	TRUE	none	none	none	ARACNe-GTEx	-	-
AEBP2	NUDT22	0	E	FALSE	FALSE	FALSE	TRUE	none	none	none	ARACNe-GTEx	-	-
AEBP2	NUDT4	0	E	FALSE	FALSE	FALSE	TRUE	none	none	none	ARACNe-GTEx	-	-
AEBP2	NUFIP2	0	E	FALSE	FALSE	FALSE	TRUE	none	none	none	ARACNe-GTEx	-	-
AEBP2	NUMB	0	E	FALSE	FALSE	FALSE	TRUE	none	none	none	ARACNe-GTEx	-	-
AEBP2	NUP58	0	E	FALSE	FALSE	FALSE	TRUE	none	none	none	ARACNe-GTEx	-	-
AEBP2	NUS1	0	E	FALSE	FALSE	FALSE	TRUE	none	none	none	ARACNe-GTEx	-	-
AEBP2	OAT	0	E	FALSE	FALSE	FALSE	TRUE	none	none	none	ARACNe-GTEx	-	-
AEBP2	OPLAH	0	E	FALSE	FALSE	FALSE	TRUE	none	none	none	ARACNe-GTEx	-	-
AEBP2	OPTN	0	E	FALSE	FALSE	FALSE	TRUE	none	none	none	ARACNe-GTEx	-	-
AEBP2	OSBPL8	0	E	FALSE	FALSE	FALSE	TRUE	none	none	none	ARACNe-GTEx	-	-
AEBP2	OTUD4	0	E	FALSE	FALSE	FALSE	TRUE	none	none	none	ARACNe-GTEx	-	-
AEBP2	OTUD6B	0	E	FALSE	FALSE	FALSE	TRUE	none	none	none	ARACNe-GTEx	-	-
AEBP2	OTULIN	0	E	FALSE	FALSE	FALSE	TRUE	none	none	none	ARACNe-GTEx	-	-
AEBP2	OXLD1	0	E	FALSE	FALSE	FALSE	TRUE	none	none	none	ARACNe-GTEx	-	-
AEBP2	OXR1	0	E	FALSE	FALSE	FALSE	TRUE	none	none	none	ARACNe-GTEx	-	-
AEBP2	PACRGL	0	E	FALSE	FALSE	FALSE	TRUE	none	none	none	ARACNe-GTEx	-	-
AEBP2	PAPD5	0	E	FALSE	FALSE	FALSE	TRUE	none	none	none	ARACNe-GTEx	-	-
AEBP2	PAPOLA	0	E	FALSE	FALSE	FALSE	TRUE	none	none	none	ARACNe-GTEx	-	-
AEBP2	PAQR3	0	E	FALSE	FALSE	FALSE	TRUE	none	none	none	ARACNe-GTEx	-	-
AEBP2	PARP11	0	E	FALSE	FALSE	FALSE	TRUE	none	none	none	ARACNe-GTEx	-	-
AEBP2	PAWR	0	E	FALSE	FALSE	FALSE	TRUE	none	none	none	ARACNe-GTEx	-	-
AEBP2	PC	0	E	FALSE	FALSE	FALSE	TRUE	none	none	none	ARACNe-GTEx	-	-
AEBP2	PCBP2	0	E	FALSE	FALSE	FALSE	TRUE	none	none	none	ARACNe-GTEx	-	-
AEBP2	PCGF5	0	E	FALSE	FALSE	FALSE	TRUE	none	none	none	ARACNe-GTEx	-	-
AEBP2	PCK2	0	E	FALSE	FALSE	FALSE	TRUE	none	none	none	ARACNe-GTEx	-	-
AEBP2	PCMTD1	0	E	FALSE	FALSE	FALSE	TRUE	none	none	none	ARACNe-GTEx	-	-
AEBP2	PCNP	0	E	FALSE	FALSE	FALSE	TRUE	none	none	none	ARACNe-GTEx	-	-
AEBP2	PCYT2	0	E	FALSE	FALSE	FALSE	TRUE	none	none	none	ARACNe-GTEx	-	-
AEBP2	PDE4D	0	E	FALSE	FALSE	FALSE	TRUE	none	none	none	ARACNe-GTEx	-	-
AEBP2	PDE5A	0	E	FALSE	FALSE	FALSE	TRUE	none	none	none	ARACNe-GTEx	-	-
AEBP2	PDLIM3	0	E	FALSE	FALSE	FALSE	TRUE	none	none	none	ARACNe-GTEx	-	-
AEBP2	PDLIM5	0	E	FALSE	FALSE	FALSE	TRUE	none	none	none	ARACNe-GTEx	-	-
AEBP2	PDS5A	0	E	FALSE	FALSE	FALSE	TRUE	none	none	none	ARACNe-GTEx	-	-
AEBP2	PEG10	0	E	FALSE	FALSE	FALSE	TRUE	none	none	none	ARACNe-GTEx	-	-
AEBP2	PEX13	0	E	FALSE	FALSE	FALSE	TRUE	none	none	none	ARACNe-GTEx	-	-
AEBP2	PGAP1	0	E	FALSE	FALSE	FALSE	TRUE	none	none	none	ARACNe-GTEx	-	-
AEBP2	PGD	0	E	FALSE	FALSE	FALSE	TRUE	none	none	none	ARACNe-GTEx	-	-
AEBP2	PGP	0	E	FALSE	FALSE	FALSE	TRUE	none	none	none	ARACNe-GTEx	-	-
AEBP2	PHF10	0	E	FALSE	FALSE	FALSE	TRUE	none	none	none	ARACNe-GTEx	-	-
AEBP2	PHF20L1	0	E	FALSE	FALSE	FALSE	TRUE	none	none	none	ARACNe-GTEx	-	-
AEBP2	PHF3	0	E	FALSE	FALSE	FALSE	TRUE	none	none	none	ARACNe-GTEx	-	-
AEBP2	PHF6	0	E	FALSE	FALSE	FALSE	TRUE	none	none	none	ARACNe-GTEx	-	-
AEBP2	PHIP	0	E	FALSE	FALSE	FALSE	TRUE	none	none	none	ARACNe-GTEx	-	-
AEBP2	PI4K2B	0	E	FALSE	FALSE	FALSE	TRUE	none	none	none	ARACNe-GTEx	-	-
AEBP2	PIBF1	0	E	FALSE	FALSE	FALSE	TRUE	none	none	none	ARACNe-GTEx	-	-
AEBP2	PICALM	0	E	FALSE	FALSE	FALSE	TRUE	none	none	none	ARACNe-GTEx	-	-
AEBP2	PIK3CA	0	E	FALSE	FALSE	FALSE	TRUE	none	none	none	ARACNe-GTEx	-	-
AEBP2	PITPNB	0	E	FALSE	FALSE	FALSE	TRUE	none	none	none	ARACNe-GTEx	-	-
AEBP2	PJA2	0	E	FALSE	FALSE	FALSE	TRUE	none	none	none	ARACNe-GTEx	-	-
AEBP2	PKN2	0	E	FALSE	FALSE	FALSE	TRUE	none	none	none	ARACNe-GTEx	-	-
AEBP2	PLCB1	0	E	FALSE	FALSE	FALSE	TRUE	none	none	none	ARACNe-GTEx	-	-
AEBP2	PLEKHA1	0	E	FALSE	FALSE	FALSE	TRUE	none	none	none	ARACNe-GTEx	-	-
AEBP2	PLEKHA2	0	E	FALSE	FALSE	FALSE	TRUE	none	none	none	ARACNe-GTEx	-	-
AEBP2	PLEKHA3	0	E	FALSE	FALSE	FALSE	TRUE	none	none	none	ARACNe-GTEx	-	-
AEBP2	PLS3	0	E	FALSE	FALSE	FALSE	TRUE	none	none	none	ARACNe-GTEx	-	-
AEBP2	PLSCR4	0	E	FALSE	FALSE	FALSE	TRUE	none	none	none	ARACNe-GTEx	-	-
AEBP2	PM20D2	0	E	FALSE	FALSE	FALSE	TRUE	none	none	none	ARACNe-GTEx	-	-
AEBP2	PNRC1	0	E	FALSE	FALSE	FALSE	TRUE	none	none	none	ARACNe-GTEx	-	-
AEBP2	PNRC2	0	E	FALSE	FALSE	FALSE	TRUE	none	none	none	ARACNe-GTEx	-	-
AEBP2	POC1B	0	E	FALSE	FALSE	FALSE	TRUE	none	none	none	ARACNe-GTEx	-	-
AEBP2	POLK	0	E	FALSE	FALSE	FALSE	TRUE	none	none	none	ARACNe-GTEx	-	-
AEBP2	POLR2M	0	E	FALSE	FALSE	FALSE	TRUE	none	none	none	ARACNe-GTEx	-	-
AEBP2	POR	0	E	FALSE	FALSE	FALSE	TRUE	none	none	none	ARACNe-GTEx	-	-
AEBP2	PPIG	0	E	FALSE	FALSE	FALSE	TRUE	none	none	none	ARACNe-GTEx	-	-
AEBP2	PPIL4	0	E	FALSE	FALSE	FALSE	TRUE	none	none	none	ARACNe-GTEx	-	-
AEBP2	PPP1CC	0	E	FALSE	FALSE	FALSE	TRUE	none	none	none	ARACNe-GTEx	-	-
AEBP2	PPP1R12A	0	E	FALSE	FALSE	FALSE	TRUE	none	none	none	ARACNe-GTEx	-	-
AEBP2	PPP1R2	0	E	FALSE	FALSE	FALSE	TRUE	none	none	none	ARACNe-GTEx	-	-
AEBP2	PPP1R3B	0	E	FALSE	FALSE	FALSE	TRUE	none	none	none	ARACNe-GTEx	-	-
AEBP2	PPP2R2A	0	E	FALSE	FALSE	FALSE	TRUE	none	none	none	ARACNe-GTEx	-	-
AEBP2	PPP2R5E	0	E	FALSE	FALSE	FALSE	TRUE	none	none	none	ARACNe-GTEx	-	-
AEBP2	PPP3CA	0	E	FALSE	FALSE	FALSE	TRUE	none	none	none	ARACNe-GTEx	-	-
AEBP2	PPP3CB	0	E	FALSE	FALSE	FALSE	TRUE	none	none	none	ARACNe-GTEx	-	-
AEBP2	PPP3R1	0	E	FALSE	FALSE	FALSE	TRUE	none	none	none	ARACNe-GTEx	-	-
AEBP2	PPP4R2	0	E	FALSE	FALSE	FALSE	TRUE	none	none	none	ARACNe-GTEx	-	-
AEBP2	PPP4R3A	0	E	FALSE	FALSE	FALSE	TRUE	none	none	none	ARACNe-GTEx	-	-
AEBP2	PPP4R3B	0	E	FALSE	FALSE	FALSE	TRUE	none	none	none	ARACNe-GTEx	-	-
AEBP2	PQLC1	0	E	FALSE	FALSE	FALSE	TRUE	none	none	none	ARACNe-GTEx	-	-
AEBP2	PREPL	0	E	FALSE	FALSE	FALSE	TRUE	none	none	none	ARACNe-GTEx	-	-
AEBP2	PRKAA2	0	E	FALSE	FALSE	FALSE	TRUE	none	none	none	ARACNe-GTEx	-	-
AEBP2	PRKAR1A	0	E	FALSE	FALSE	FALSE	TRUE	none	none	none	ARACNe-GTEx	-	-
AEBP2	PRKCI	0	E	FALSE	FALSE	FALSE	TRUE	none	none	none	ARACNe-GTEx	-	-
AEBP2	PRKG1	0	E	FALSE	FALSE	FALSE	TRUE	none	none	none	ARACNe-GTEx	-	-
AEBP2	PRKRA	0	E	FALSE	FALSE	FALSE	TRUE	none	none	none	ARACNe-GTEx	-	-
AEBP2	PRMT9	0	E	FALSE	FALSE	FALSE	TRUE	none	none	none	ARACNe-GTEx	-	-
AEBP2	PRNP	0	E	FALSE	FALSE	FALSE	TRUE	none	none	none	ARACNe-GTEx	-	-
AEBP2	PRPF18	0	E	FALSE	FALSE	FALSE	TRUE	none	none	none	ARACNe-GTEx	-	-
AEBP2	PSIP1	0	E	FALSE	FALSE	FALSE	TRUE	none	none	none	ARACNe-GTEx	-	-
AEBP2	PTBP3	0	E	FALSE	FALSE	FALSE	TRUE	none	none	none	ARACNe-GTEx	-	-
AEBP2	PTGES3	0	E	FALSE	FALSE	FALSE	TRUE	none	none	none	ARACNe-GTEx	-	-
AEBP2	PTK2	0	E	FALSE	FALSE	FALSE	TRUE	none	none	none	ARACNe-GTEx	-	-
AEBP2	PTP4A1	0	E	FALSE	FALSE	FALSE	TRUE	none	none	none	ARACNe-GTEx	-	-
AEBP2	PTPN12	0	E	FALSE	FALSE	FALSE	TRUE	none	none	none	ARACNe-GTEx	-	-
AEBP2	PUM1	0	E	FALSE	FALSE	FALSE	TRUE	none	none	none	ARACNe-GTEx	-	-
AEBP2	PUM2	0	E	FALSE	FALSE	FALSE	TRUE	none	none	none	ARACNe-GTEx	-	-
AEBP2	PURA	0	E	FALSE	FALSE	FALSE	TRUE	none	none	none	ARACNe-GTEx	-	-
AEBP2	PURB	0	E	FALSE	FALSE	FALSE	TRUE	none	none	none	ARACNe-GTEx	-	-
AEBP2	PYGO1	0	E	FALSE	FALSE	FALSE	TRUE	none	none	none	ARACNe-GTEx	-	-
AEBP2	QKI	0	E	FALSE	FALSE	FALSE	TRUE	none	none	none	ARACNe-GTEx	-	-
AEBP2	RAB11FIP2	0	E	FALSE	FALSE	FALSE	TRUE	none	none	none	ARACNe-GTEx	-	-
AEBP2	RAB14	0	E	FALSE	FALSE	FALSE	TRUE	none	none	none	ARACNe-GTEx	-	-
AEBP2	RAB18	0	E	FALSE	FALSE	FALSE	TRUE	none	none	none	ARACNe-GTEx	-	-
AEBP2	RAB21	0	E	FALSE	FALSE	FALSE	TRUE	none	none	none	ARACNe-GTEx	-	-
AEBP2	RAB28	0	E	FALSE	FALSE	FALSE	TRUE	none	none	none	ARACNe-GTEx	-	-
AEBP2	RAB33B	0	E	FALSE	FALSE	FALSE	TRUE	none	none	none	ARACNe-GTEx	-	-
AEBP2	RAB3GAP1	0	E	FALSE	FALSE	FALSE	TRUE	none	none	none	ARACNe-GTEx	-	-
AEBP2	RAB5A	0	E	FALSE	FALSE	FALSE	TRUE	none	none	none	ARACNe-GTEx	-	-
AEBP2	RAB6A	0	E	FALSE	FALSE	FALSE	TRUE	none	none	none	ARACNe-GTEx	-	-
AEBP2	RABGAP1L	0	E	FALSE	FALSE	FALSE	TRUE	none	none	none	ARACNe-GTEx	-	-
AEBP2	RAD51B	0	E	FALSE	FALSE	FALSE	TRUE	none	none	none	ARACNe-GTEx	-	-
AEBP2	RALGAPA1	0	E	FALSE	FALSE	FALSE	TRUE	none	none	none	ARACNe-GTEx	-	-
AEBP2	RAP1A	0	E	FALSE	FALSE	FALSE	TRUE	none	none	none	ARACNe-GTEx	-	-
AEBP2	RAPGEF6	0	E	FALSE	FALSE	FALSE	TRUE	none	none	none	ARACNe-GTEx	-	-
AEBP2	RASA2	0	E	FALSE	FALSE	FALSE	TRUE	none	none	none	ARACNe-GTEx	-	-
AEBP2	RASGEF1B	0	E	FALSE	FALSE	FALSE	TRUE	none	none	none	ARACNe-GTEx	-	-
AEBP2	RB1	0	E	FALSE	FALSE	FALSE	TRUE	none	none	none	ARACNe-GTEx	-	-
AEBP2	RBM27	0	E	FALSE	FALSE	FALSE	TRUE	none	none	none	ARACNe-GTEx	-	-
AEBP2	RBM7	0	E	FALSE	FALSE	FALSE	TRUE	none	none	none	ARACNe-GTEx	-	-
AEBP2	RBMS1	0	E	FALSE	FALSE	FALSE	TRUE	none	none	none	ARACNe-GTEx	-	-
AEBP2	RBMX	0	E	FALSE	FALSE	FALSE	TRUE	none	none	none	ARACNe-GTEx	-	-
AEBP2	RBP4	0	E	FALSE	FALSE	FALSE	TRUE	none	none	none	ARACNe-GTEx	-	-
AEBP2	RBPJ	0	E	FALSE	FALSE	FALSE	TRUE	none	none	none	ARACNe-GTEx	-	-
AEBP2	RCOR1	0	E	FALSE	FALSE	FALSE	TRUE	none	none	none	ARACNe-GTEx	-	-
AEBP2	REEP3	0	E	FALSE	FALSE	FALSE	TRUE	none	none	none	ARACNe-GTEx	-	-
AEBP2	REV1	0	E	FALSE	FALSE	FALSE	TRUE	none	none	none	ARACNe-GTEx	-	-
AEBP2	RHOQ	0	E	FALSE	FALSE	FALSE	TRUE	none	none	none	ARACNe-GTEx	-	-
AEBP2	RHOT1	0	E	FALSE	FALSE	FALSE	TRUE	none	none	none	ARACNe-GTEx	-	-
AEBP2	RIF1	0	E	FALSE	FALSE	FALSE	TRUE	none	none	none	ARACNe-GTEx	-	-
AEBP2	RIMKLB	0	E	FALSE	FALSE	FALSE	TRUE	none	none	none	ARACNe-GTEx	-	-
AEBP2	RLF	0	E	FALSE	FALSE	FALSE	TRUE	none	none	none	ARACNe-GTEx	-	-
AEBP2	RLIM	0	E	FALSE	FALSE	FALSE	TRUE	none	none	none	ARACNe-GTEx	-	-
AEBP2	RNF11	0	E	FALSE	FALSE	FALSE	TRUE	none	none	none	ARACNe-GTEx	-	-
AEBP2	RNF111	0	E	FALSE	FALSE	FALSE	TRUE	none	none	none	ARACNe-GTEx	-	-
AEBP2	RNF138	0	E	FALSE	FALSE	FALSE	TRUE	none	none	none	ARACNe-GTEx	-	-
AEBP2	RNF180	0	E	FALSE	FALSE	FALSE	TRUE	none	none	none	ARACNe-GTEx	-	-
AEBP2	RNF2	0	E	FALSE	FALSE	FALSE	TRUE	none	none	none	ARACNe-GTEx	-	-
AEBP2	RNF217	0	E	FALSE	FALSE	FALSE	TRUE	none	none	none	ARACNe-GTEx	-	-
AEBP2	RORA	0	E	FALSE	FALSE	FALSE	TRUE	none	none	none	ARACNe-GTEx	-	-
AEBP2	RP2	0	E	FALSE	FALSE	FALSE	TRUE	none	none	none	ARACNe-GTEx	-	-
AEBP2	RPE	0	E	FALSE	FALSE	FALSE	TRUE	none	none	none	ARACNe-GTEx	-	-
AEBP2	RPL15	0	E	FALSE	FALSE	FALSE	TRUE	none	none	none	ARACNe-GTEx	-	-
AEBP2	RPL22	0	E	FALSE	FALSE	FALSE	TRUE	none	none	none	ARACNe-GTEx	-	-
AEBP2	RPRD1A	0	E	FALSE	FALSE	FALSE	TRUE	none	none	none	ARACNe-GTEx	-	-
AEBP2	RPS6KA2	0	E	FALSE	FALSE	FALSE	TRUE	none	none	none	ARACNe-GTEx	-	-
AEBP2	RPS6KB1	0	E	FALSE	FALSE	FALSE	TRUE	none	none	none	ARACNe-GTEx	-	-
AEBP2	RSF1	0	E	FALSE	FALSE	FALSE	TRUE	none	none	none	ARACNe-GTEx	-	-
AEBP2	RSL24D1	0	E	FALSE	FALSE	FALSE	TRUE	none	none	none	ARACNe-GTEx	-	-
AEBP2	RSRC2	0	E	FALSE	FALSE	FALSE	TRUE	none	none	none	ARACNe-GTEx	-	-
AEBP2	RUFY2	0	E	FALSE	FALSE	FALSE	TRUE	none	none	none	ARACNe-GTEx	-	-
AEBP2	RUFY3	0	E	FALSE	FALSE	FALSE	TRUE	none	none	none	ARACNe-GTEx	-	-
AEBP2	RYBP	0	E	FALSE	FALSE	FALSE	TRUE	none	none	none	ARACNe-GTEx	-	-
AEBP2	RYK	0	E	FALSE	FALSE	FALSE	TRUE	none	none	none	ARACNe-GTEx	-	-
AEBP2	SAMD8	0	E	FALSE	FALSE	FALSE	TRUE	none	none	none	ARACNe-GTEx	-	-
AEBP2	SARNP	0	E	FALSE	FALSE	FALSE	TRUE	none	none	none	ARACNe-GTEx	-	-
AEBP2	SAV1	0	E	FALSE	FALSE	FALSE	TRUE	none	none	none	ARACNe-GTEx	-	-
AEBP2	SCAMP1	0	E	FALSE	FALSE	FALSE	TRUE	none	none	none	ARACNe-GTEx	-	-
AEBP2	SCAPER	0	E	FALSE	FALSE	FALSE	TRUE	none	none	none	ARACNe-GTEx	-	-
AEBP2	SCLT1	0	E	FALSE	FALSE	FALSE	TRUE	none	none	none	ARACNe-GTEx	-	-
AEBP2	SCML2	0	E	FALSE	FALSE	FALSE	TRUE	none	none	none	ARACNe-GTEx	-	-
AEBP2	SDE2	0	E	FALSE	FALSE	FALSE	TRUE	none	none	none	ARACNe-GTEx	-	-
AEBP2	SEC22A	0	E	FALSE	FALSE	FALSE	TRUE	none	none	none	ARACNe-GTEx	-	-
AEBP2	SEC24B	0	E	FALSE	FALSE	FALSE	TRUE	none	none	none	ARACNe-GTEx	-	-
AEBP2	SEC62	0	E	FALSE	FALSE	FALSE	TRUE	none	none	none	ARACNe-GTEx	-	-
AEBP2	SENP6	0	E	FALSE	FALSE	FALSE	TRUE	none	none	none	ARACNe-GTEx	-	-
AEBP2	SEPT10	0	E	FALSE	FALSE	FALSE	TRUE	none	none	none	ARACNe-GTEx	-	-
AEBP2	SEPT7	0	E	FALSE	FALSE	FALSE	TRUE	none	none	none	ARACNe-GTEx	-	-
AEBP2	SERPINI1	0	E	FALSE	FALSE	FALSE	TRUE	none	none	none	ARACNe-GTEx	-	-
AEBP2	SETBP1	0	E	FALSE	FALSE	FALSE	TRUE	none	none	none	ARACNe-GTEx	-	-
AEBP2	SGMS1	0	E	FALSE	FALSE	FALSE	TRUE	none	none	none	ARACNe-GTEx	-	-
AEBP2	SH3RF1	0	E	FALSE	FALSE	FALSE	TRUE	none	none	none	ARACNe-GTEx	-	-
AEBP2	SIAH1	0	E	FALSE	FALSE	FALSE	TRUE	none	none	none	ARACNe-GTEx	-	-
AEBP2	SIRT1	0	E	FALSE	FALSE	FALSE	TRUE	none	none	none	ARACNe-GTEx	-	-
AEBP2	SKIL	0	E	FALSE	FALSE	FALSE	TRUE	none	none	none	ARACNe-GTEx	-	-
AEBP2	SLAIN2	0	E	FALSE	FALSE	FALSE	TRUE	none	none	none	ARACNe-GTEx	-	-
AEBP2	SLC25A1	0	E	FALSE	FALSE	FALSE	TRUE	none	none	none	ARACNe-GTEx	-	-
AEBP2	SLC25A32	0	E	FALSE	FALSE	FALSE	TRUE	none	none	none	ARACNe-GTEx	-	-
AEBP2	SLC30A7	0	E	FALSE	FALSE	FALSE	TRUE	none	none	none	ARACNe-GTEx	-	-
AEBP2	SLC4A7	0	E	FALSE	FALSE	FALSE	TRUE	none	none	none	ARACNe-GTEx	-	-
AEBP2	SLC5A3	0	E	FALSE	FALSE	FALSE	TRUE	none	none	none	ARACNe-GTEx	-	-
AEBP2	SLMAP	0	E	FALSE	FALSE	FALSE	TRUE	none	none	none	ARACNe-GTEx	-	-
AEBP2	SMAD2	0	E	FALSE	FALSE	FALSE	TRUE	none	none	none	ARACNe-GTEx	-	-
AEBP2	SMAD5	0	E	FALSE	FALSE	FALSE	TRUE	none	none	none	ARACNe-GTEx	-	-
AEBP2	SMC5	0	E	FALSE	FALSE	FALSE	TRUE	none	none	none	ARACNe-GTEx	-	-
AEBP2	SMCHD1	0	E	FALSE	FALSE	FALSE	TRUE	none	none	none	ARACNe-GTEx	-	-
AEBP2	SMNDC1	0	E	FALSE	FALSE	FALSE	TRUE	none	none	none	ARACNe-GTEx	-	-
AEBP2	SMURF2	0	E	FALSE	FALSE	FALSE	TRUE	none	none	none	ARACNe-GTEx	-	-
AEBP2	SNAPC1	0	E	FALSE	FALSE	FALSE	TRUE	none	none	none	ARACNe-GTEx	-	-
AEBP2	SNRK	0	E	FALSE	FALSE	FALSE	TRUE	none	none	none	ARACNe-GTEx	-	-
AEBP2	SNRNP27	0	E	FALSE	FALSE	FALSE	TRUE	none	none	none	ARACNe-GTEx	-	-
AEBP2	SNX16	0	E	FALSE	FALSE	FALSE	TRUE	none	none	none	ARACNe-GTEx	-	-
AEBP2	SNX25	0	E	FALSE	FALSE	FALSE	TRUE	none	none	none	ARACNe-GTEx	-	-
AEBP2	SNX8	0	E	FALSE	FALSE	FALSE	TRUE	none	none	none	ARACNe-GTEx	-	-
AEBP2	SOCS5	0	E	FALSE	FALSE	FALSE	TRUE	none	none	none	ARACNe-GTEx	-	-
AEBP2	SP3	0	E	FALSE	FALSE	FALSE	TRUE	none	none	none	ARACNe-GTEx	-	-
AEBP2	SPATA5	0	E	FALSE	FALSE	FALSE	TRUE	none	none	none	ARACNe-GTEx	-	-
AEBP2	SPICE1	0	E	FALSE	FALSE	FALSE	TRUE	none	none	none	ARACNe-GTEx	-	-
AEBP2	SPIN1	0	E	FALSE	FALSE	FALSE	TRUE	none	none	none	ARACNe-GTEx	-	-
AEBP2	SPOPL	0	E	FALSE	FALSE	FALSE	TRUE	none	none	none	ARACNe-GTEx	-	-
AEBP2	SPRED1	0	E	FALSE	FALSE	FALSE	TRUE	none	none	none	ARACNe-GTEx	-	-
AEBP2	SPRED2	0	E	FALSE	FALSE	FALSE	TRUE	none	none	none	ARACNe-GTEx	-	-
AEBP2	SPRY1	0	E	FALSE	FALSE	FALSE	TRUE	none	none	none	ARACNe-GTEx	-	-
AEBP2	SRGAP2C	0	E	FALSE	FALSE	FALSE	TRUE	none	none	none	ARACNe-GTEx	-	-
AEBP2	SRPK2	0	E	FALSE	FALSE	FALSE	TRUE	none	none	none	ARACNe-GTEx	-	-
AEBP2	SRRM1	0	E	FALSE	FALSE	FALSE	TRUE	none	none	none	ARACNe-GTEx	-	-
AEBP2	SRSF3	0	E	FALSE	FALSE	FALSE	TRUE	none	none	none	ARACNe-GTEx	-	-
AEBP2	SRSF7	0	E	FALSE	FALSE	FALSE	TRUE	none	none	none	ARACNe-GTEx	-	-
AEBP2	SS18	0	E	FALSE	FALSE	FALSE	TRUE	none	none	none	ARACNe-GTEx	-	-
AEBP2	SSBP2	0	E	FALSE	FALSE	FALSE	TRUE	none	none	none	ARACNe-GTEx	-	-
AEBP2	SSFA2	0	E	FALSE	FALSE	FALSE	TRUE	none	none	none	ARACNe-GTEx	-	-
AEBP2	SSU72	0	E	FALSE	FALSE	FALSE	TRUE	none	none	none	ARACNe-GTEx	-	-
AEBP2	STAG2	0	E	FALSE	FALSE	FALSE	TRUE	none	none	none	ARACNe-GTEx	-	-
AEBP2	STAM2	0	E	FALSE	FALSE	FALSE	TRUE	none	none	none	ARACNe-GTEx	-	-
AEBP2	STAU2	0	E	FALSE	FALSE	FALSE	TRUE	none	none	none	ARACNe-GTEx	-	-
AEBP2	STK3	0	E	FALSE	FALSE	FALSE	TRUE	none	none	none	ARACNe-GTEx	-	-
AEBP2	STK38L	0	E	FALSE	FALSE	FALSE	TRUE	none	none	none	ARACNe-GTEx	-	-
AEBP2	STK4	0	E	FALSE	FALSE	FALSE	TRUE	none	none	none	ARACNe-GTEx	-	-
AEBP2	STRN	0	E	FALSE	FALSE	FALSE	TRUE	none	none	none	ARACNe-GTEx	-	-
AEBP2	STRN3	0	E	FALSE	FALSE	FALSE	TRUE	none	none	none	ARACNe-GTEx	-	-
AEBP2	STX6	0	E	FALSE	FALSE	FALSE	TRUE	none	none	none	ARACNe-GTEx	-	-
AEBP2	STXBP3	0	E	FALSE	FALSE	FALSE	TRUE	none	none	none	ARACNe-GTEx	-	-
AEBP2	SUB1	0	E	FALSE	FALSE	FALSE	TRUE	none	none	none	ARACNe-GTEx	-	-
AEBP2	SUDS3	0	E	FALSE	FALSE	FALSE	TRUE	none	none	none	ARACNe-GTEx	-	-
AEBP2	SUMO2	0	E	FALSE	FALSE	FALSE	TRUE	none	none	none	ARACNe-GTEx	-	-
AEBP2	SUZ12	0	E	FALSE	FALSE	FALSE	TRUE	none	none	none	ARACNe-GTEx	-	-
AEBP2	SVIP	0	E	FALSE	FALSE	FALSE	TRUE	none	none	none	ARACNe-GTEx	-	-
AEBP2	SYTL2	0	E	FALSE	FALSE	FALSE	TRUE	none	none	none	ARACNe-GTEx	-	-
AEBP2	TAB2	0	E	FALSE	FALSE	FALSE	TRUE	none	none	none	ARACNe-GTEx	-	-
AEBP2	TAF1D	0	E	FALSE	FALSE	FALSE	TRUE	none	none	none	ARACNe-GTEx	-	-
AEBP2	TAF3	0	E	FALSE	FALSE	FALSE	TRUE	none	none	none	ARACNe-GTEx	-	-
AEBP2	TAF7	0	E	FALSE	FALSE	FALSE	TRUE	none	none	none	ARACNe-GTEx	-	-
AEBP2	TAF9B	0	E	FALSE	FALSE	FALSE	TRUE	none	none	none	ARACNe-GTEx	-	-
AEBP2	TANK	0	E	FALSE	FALSE	FALSE	TRUE	none	none	none	ARACNe-GTEx	-	-
AEBP2	TAOK1	0	E	FALSE	FALSE	FALSE	TRUE	none	none	none	ARACNe-GTEx	-	-
AEBP2	TBC1D15	0	E	FALSE	FALSE	FALSE	TRUE	none	none	none	ARACNe-GTEx	-	-
AEBP2	TBC1D16	0	E	FALSE	FALSE	FALSE	TRUE	none	none	none	ARACNe-GTEx	-	-
AEBP2	TBC1D23	0	E	FALSE	FALSE	FALSE	TRUE	none	none	none	ARACNe-GTEx	-	-
AEBP2	TCEA1	0	E	FALSE	FALSE	FALSE	TRUE	none	none	none	ARACNe-GTEx	-	-
AEBP2	TCEAL7	0	E	FALSE	FALSE	FALSE	TRUE	none	none	none	ARACNe-GTEx	-	-
AEBP2	TCF12	0	E	FALSE	FALSE	FALSE	TRUE	none	none	none	ARACNe-GTEx	-	-
AEBP2	TCF4	0	E	FALSE	FALSE	FALSE	TRUE	none	none	none	ARACNe-GTEx	-	-
AEBP2	TCN2	0	E	FALSE	FALSE	FALSE	TRUE	none	none	none	ARACNe-GTEx	-	-
AEBP2	TDRD3	0	E	FALSE	FALSE	FALSE	TRUE	none	none	none	ARACNe-GTEx	-	-
AEBP2	TEAD3	0	E	FALSE	FALSE	FALSE	TRUE	none	none	none	ARACNe-GTEx	-	-
AEBP2	TERF1	0	E	FALSE	FALSE	FALSE	TRUE	none	none	none	ARACNe-GTEx	-	-
AEBP2	TERF2IP	0	E	FALSE	FALSE	FALSE	TRUE	none	none	none	ARACNe-GTEx	-	-
AEBP2	TET2	0	E	FALSE	FALSE	FALSE	TRUE	none	none	none	ARACNe-GTEx	-	-
AEBP2	TEX10	0	E	FALSE	FALSE	FALSE	TRUE	none	none	none	ARACNe-GTEx	-	-
AEBP2	THUMPD2	0	E	FALSE	FALSE	FALSE	TRUE	none	none	none	ARACNe-GTEx	-	-
AEBP2	TLK1	0	E	FALSE	FALSE	FALSE	TRUE	none	none	none	ARACNe-GTEx	-	-
AEBP2	TLK2	0	E	FALSE	FALSE	FALSE	TRUE	none	none	none	ARACNe-GTEx	-	-
AEBP2	TM9SF3	0	E	FALSE	FALSE	FALSE	TRUE	none	none	none	ARACNe-GTEx	-	-
AEBP2	TMA16	0	E	FALSE	FALSE	FALSE	TRUE	none	none	none	ARACNe-GTEx	-	-
AEBP2	TMEM104	0	E	FALSE	FALSE	FALSE	TRUE	none	none	none	ARACNe-GTEx	-	-
AEBP2	TMEM120A	0	E	FALSE	FALSE	FALSE	TRUE	none	none	none	ARACNe-GTEx	-	-
AEBP2	TMEM123	0	E	FALSE	FALSE	FALSE	TRUE	none	none	none	ARACNe-GTEx	-	-
AEBP2	TMEM135	0	E	FALSE	FALSE	FALSE	TRUE	none	none	none	ARACNe-GTEx	-	-
AEBP2	TMEM167B	0	E	FALSE	FALSE	FALSE	TRUE	none	none	none	ARACNe-GTEx	-	-
AEBP2	TMEM263	0	E	FALSE	FALSE	FALSE	TRUE	none	none	none	ARACNe-GTEx	-	-
AEBP2	TMEM30A	0	E	FALSE	FALSE	FALSE	TRUE	none	none	none	ARACNe-GTEx	-	-
AEBP2	TMEM53	0	E	FALSE	FALSE	FALSE	TRUE	none	none	none	ARACNe-GTEx	-	-
AEBP2	TMEM68	0	E	FALSE	FALSE	FALSE	TRUE	none	none	none	ARACNe-GTEx	-	-
AEBP2	TMEM8A	0	E	FALSE	FALSE	FALSE	TRUE	none	none	none	ARACNe-GTEx	-	-
AEBP2	TMOD3	0	E	FALSE	FALSE	FALSE	TRUE	none	none	none	ARACNe-GTEx	-	-
AEBP2	TNKS2	0	E	FALSE	FALSE	FALSE	TRUE	none	none	none	ARACNe-GTEx	-	-
AEBP2	TOMM20	0	E	FALSE	FALSE	FALSE	TRUE	none	none	none	ARACNe-GTEx	-	-
AEBP2	TOPORS	0	E	FALSE	FALSE	FALSE	TRUE	none	none	none	ARACNe-GTEx	-	-
AEBP2	TRA2B	0	E	FALSE	FALSE	FALSE	TRUE	none	none	none	ARACNe-GTEx	-	-
AEBP2	TRAPPC6B	0	E	FALSE	FALSE	FALSE	TRUE	none	none	none	ARACNe-GTEx	-	-
AEBP2	TRIM23	0	E	FALSE	FALSE	FALSE	TRUE	none	none	none	ARACNe-GTEx	-	-
AEBP2	TRMT11	0	E	FALSE	FALSE	FALSE	TRUE	none	none	none	ARACNe-GTEx	-	-
AEBP2	TROVE2	0	E	FALSE	FALSE	FALSE	TRUE	none	none	none	ARACNe-GTEx	-	-
AEBP2	TSC22D2	0	E	FALSE	FALSE	FALSE	TRUE	none	none	none	ARACNe-GTEx	-	-
AEBP2	TSNAX	0	E	FALSE	FALSE	FALSE	TRUE	none	none	none	ARACNe-GTEx	-	-
AEBP2	TST	0	E	FALSE	FALSE	FALSE	TRUE	none	none	none	ARACNe-GTEx	-	-
AEBP2	TTBK2	0	E	FALSE	FALSE	FALSE	TRUE	none	none	none	ARACNe-GTEx	-	-
AEBP2	TTC33	0	E	FALSE	FALSE	FALSE	TRUE	none	none	none	ARACNe-GTEx	-	-
AEBP2	TTC39B	0	E	FALSE	FALSE	FALSE	TRUE	none	none	none	ARACNe-GTEx	-	-
AEBP2	TULP3	0	E	FALSE	FALSE	FALSE	TRUE	none	none	none	ARACNe-GTEx	-	-
AEBP2	TWSG1	0	E	FALSE	FALSE	FALSE	TRUE	none	none	none	ARACNe-GTEx	-	-
AEBP2	UBA2	0	E	FALSE	FALSE	FALSE	TRUE	none	none	none	ARACNe-GTEx	-	-
AEBP2	UBA6	0	E	FALSE	FALSE	FALSE	TRUE	none	none	none	ARACNe-GTEx	-	-
AEBP2	UBE2B	0	E	FALSE	FALSE	FALSE	TRUE	none	none	none	ARACNe-GTEx	-	-
AEBP2	UBE2D1	0	E	FALSE	FALSE	FALSE	TRUE	none	none	none	ARACNe-GTEx	-	-
AEBP2	UBE2D2	0	E	FALSE	FALSE	FALSE	TRUE	none	none	none	ARACNe-GTEx	-	-
AEBP2	UBE2D3	0	E	FALSE	FALSE	FALSE	TRUE	none	none	none	ARACNe-GTEx	-	-
AEBP2	UBE2E1	0	E	FALSE	FALSE	FALSE	TRUE	none	none	none	ARACNe-GTEx	-	-
AEBP2	UBE2E2	0	E	FALSE	FALSE	FALSE	TRUE	none	none	none	ARACNe-GTEx	-	-
AEBP2	UBE2V2	0	E	FALSE	FALSE	FALSE	TRUE	none	none	none	ARACNe-GTEx	-	-
AEBP2	UBE2W	0	E	FALSE	FALSE	FALSE	TRUE	none	none	none	ARACNe-GTEx	-	-
AEBP2	UBE3A	0	E	FALSE	FALSE	FALSE	TRUE	none	none	none	ARACNe-GTEx	-	-
AEBP2	UBQLN2	0	E	FALSE	FALSE	FALSE	TRUE	none	none	none	ARACNe-GTEx	-	-
AEBP2	UBR1	0	E	FALSE	FALSE	FALSE	TRUE	none	none	none	ARACNe-GTEx	-	-
AEBP2	UFM1	0	E	FALSE	FALSE	FALSE	TRUE	none	none	none	ARACNe-GTEx	-	-
AEBP2	UHRF1BP1L	0	E	FALSE	FALSE	FALSE	TRUE	none	none	none	ARACNe-GTEx	-	-
AEBP2	UIMC1	0	E	FALSE	FALSE	FALSE	TRUE	none	none	none	ARACNe-GTEx	-	-
AEBP2	UMAD1	0	E	FALSE	FALSE	FALSE	TRUE	none	none	none	ARACNe-GTEx	-	-
AEBP2	UPF3B	0	E	FALSE	FALSE	FALSE	TRUE	none	none	none	ARACNe-GTEx	-	-
AEBP2	URI1	0	E	FALSE	FALSE	FALSE	TRUE	none	none	none	ARACNe-GTEx	-	-
AEBP2	USP12	0	E	FALSE	FALSE	FALSE	TRUE	none	none	none	ARACNe-GTEx	-	-
AEBP2	USP15	0	E	FALSE	FALSE	FALSE	TRUE	none	none	none	ARACNe-GTEx	-	-
AEBP2	USP25	0	E	FALSE	FALSE	FALSE	TRUE	none	none	none	ARACNe-GTEx	-	-
AEBP2	VAPA	0	E	FALSE	FALSE	FALSE	TRUE	none	none	none	ARACNe-GTEx	-	-
AEBP2	VEZT	0	E	FALSE	FALSE	FALSE	TRUE	none	none	none	ARACNe-GTEx	-	-
AEBP2	VGLL4	0	E	FALSE	FALSE	FALSE	TRUE	none	none	none	ARACNe-GTEx	-	-
AEBP2	VMA21	0	E	FALSE	FALSE	FALSE	TRUE	none	none	none	ARACNe-GTEx	-	-
AEBP2	VPS26A	0	E	FALSE	FALSE	FALSE	TRUE	none	none	none	ARACNe-GTEx	-	-
AEBP2	VPS37A	0	E	FALSE	FALSE	FALSE	TRUE	none	none	none	ARACNe-GTEx	-	-
AEBP2	VSIG4	0	E	FALSE	FALSE	FALSE	TRUE	none	none	none	ARACNe-GTEx	-	-
AEBP2	WAC	0	E	FALSE	FALSE	FALSE	TRUE	none	none	none	ARACNe-GTEx	-	-
AEBP2	WAPL	0	E	FALSE	FALSE	FALSE	TRUE	none	none	none	ARACNe-GTEx	-	-
AEBP2	WASL	0	E	FALSE	FALSE	FALSE	TRUE	none	none	none	ARACNe-GTEx	-	-
AEBP2	WDFY1	0	E	FALSE	FALSE	FALSE	TRUE	none	none	none	ARACNe-GTEx	-	-
AEBP2	WHSC1L1	0	E	FALSE	FALSE	FALSE	TRUE	none	none	none	ARACNe-GTEx	-	-
AEBP2	WWP1	0	E	FALSE	FALSE	FALSE	TRUE	none	none	none	ARACNe-GTEx	-	-
AEBP2	WWTR1	0	E	FALSE	FALSE	FALSE	TRUE	none	none	none	ARACNe-GTEx	-	-
AEBP2	YAF2	0	E	FALSE	FALSE	FALSE	TRUE	none	none	none	ARACNe-GTEx	-	-
AEBP2	YAP1	0	E	FALSE	FALSE	FALSE	TRUE	none	none	none	ARACNe-GTEx	-	-
AEBP2	YES1	0	E	FALSE	FALSE	FALSE	TRUE	none	none	none	ARACNe-GTEx	-	-
AEBP2	YPEL5	0	E	FALSE	FALSE	FALSE	TRUE	none	none	none	ARACNe-GTEx	-	-
AEBP2	YTHDC1	0	E	FALSE	FALSE	FALSE	TRUE	none	none	none	ARACNe-GTEx	-	-
AEBP2	YY1AP1	0	E	FALSE	FALSE	FALSE	TRUE	none	none	none	ARACNe-GTEx	-	-
AEBP2	ZBTB10	0	E	FALSE	FALSE	FALSE	TRUE	none	none	none	ARACNe-GTEx	-	-
AEBP2	ZBTB11	0	E	FALSE	FALSE	FALSE	TRUE	none	none	none	ARACNe-GTEx	-	-
AEBP2	ZBTB20	0	E	FALSE	FALSE	FALSE	TRUE	none	none	none	ARACNe-GTEx	-	-
AEBP2	ZBTB21	0	E	FALSE	FALSE	FALSE	TRUE	none	none	none	ARACNe-GTEx	-	-
AEBP2	ZBTB42	0	E	FALSE	FALSE	FALSE	TRUE	none	none	none	ARACNe-GTEx	-	-
AEBP2	ZBTB7B	0	E	FALSE	FALSE	FALSE	TRUE	none	none	none	ARACNe-GTEx	-	-
AEBP2	ZC2HC1A	0	E	FALSE	FALSE	FALSE	TRUE	none	none	none	ARACNe-GTEx	-	-
AEBP2	ZC3H15	0	E	FALSE	FALSE	FALSE	TRUE	none	none	none	ARACNe-GTEx	-	-
AEBP2	ZC3H7A	0	E	FALSE	FALSE	FALSE	TRUE	none	none	none	ARACNe-GTEx	-	-
AEBP2	ZCCHC2	0	E	FALSE	FALSE	FALSE	TRUE	none	none	none	ARACNe-GTEx	-	-
AEBP2	ZCCHC7	0	E	FALSE	FALSE	FALSE	TRUE	none	none	none	ARACNe-GTEx	-	-
AEBP2	ZCWPW2	0	E	FALSE	FALSE	FALSE	TRUE	none	none	none	ARACNe-GTEx	-	-
AEBP2	ZDBF2	0	E	FALSE	FALSE	FALSE	TRUE	none	none	none	ARACNe-GTEx	-	-
AEBP2	ZDHHC17	0	E	FALSE	FALSE	FALSE	TRUE	none	none	none	ARACNe-GTEx	-	-
AEBP2	ZDHHC20	0	E	FALSE	FALSE	FALSE	TRUE	none	none	none	ARACNe-GTEx	-	-
AEBP2	ZDHHC21	0	E	FALSE	FALSE	FALSE	TRUE	none	none	none	ARACNe-GTEx	-	-
AEBP2	ZFAND1	0	E	FALSE	FALSE	FALSE	TRUE	none	none	none	ARACNe-GTEx	-	-
AEBP2	ZFP36L1	0	E	FALSE	FALSE	FALSE	TRUE	none	none	none	ARACNe-GTEx	-	-
AEBP2	ZFR	0	E	FALSE	FALSE	FALSE	TRUE	none	none	none	ARACNe-GTEx	-	-
AEBP2	ZFYVE16	0	E	FALSE	FALSE	FALSE	TRUE	none	none	none	ARACNe-GTEx	-	-
AEBP2	ZHX1	0	E	FALSE	FALSE	FALSE	TRUE	none	none	none	ARACNe-GTEx	-	-
AEBP2	ZMAT3	0	E	FALSE	FALSE	FALSE	TRUE	none	none	none	ARACNe-GTEx	-	-
AEBP2	ZMYM5	0	E	FALSE	FALSE	FALSE	TRUE	none	none	none	ARACNe-GTEx	-	-
AEBP2	ZNF136	0	E	FALSE	FALSE	FALSE	TRUE	none	none	none	ARACNe-GTEx	-	-
AEBP2	ZNF143	0	E	FALSE	FALSE	FALSE	TRUE	none	none	none	ARACNe-GTEx	-	-
AEBP2	ZNF146	0	E	FALSE	FALSE	FALSE	TRUE	none	none	none	ARACNe-GTEx	-	-
AEBP2	ZNF148	0	E	FALSE	FALSE	FALSE	TRUE	none	none	none	ARACNe-GTEx	-	-
AEBP2	ZNF207	0	E	FALSE	FALSE	FALSE	TRUE	none	none	none	ARACNe-GTEx	-	-
AEBP2	ZNF227	0	E	FALSE	FALSE	FALSE	TRUE	none	none	none	ARACNe-GTEx	-	-
AEBP2	ZNF280D	0	E	FALSE	FALSE	FALSE	TRUE	none	none	none	ARACNe-GTEx	-	-
AEBP2	ZNF451	0	E	FALSE	FALSE	FALSE	TRUE	none	none	none	ARACNe-GTEx	-	-
AEBP2	ZNF460	0	E	FALSE	FALSE	FALSE	TRUE	none	none	none	ARACNe-GTEx	-	-
AEBP2	ZNF548	0	E	FALSE	FALSE	FALSE	TRUE	none	none	none	ARACNe-GTEx	-	-
AEBP2	ZNF567	0	E	FALSE	FALSE	FALSE	TRUE	none	none	none	ARACNe-GTEx	-	-
AEBP2	ZNF568	0	E	FALSE	FALSE	FALSE	TRUE	none	none	none	ARACNe-GTEx	-	-
AEBP2	ZNF644	0	E	FALSE	FALSE	FALSE	TRUE	none	none	none	ARACNe-GTEx	-	-
AEBP2	ZNF649	0	E	FALSE	FALSE	FALSE	TRUE	none	none	none	ARACNe-GTEx	-	-
AEBP2	ZNF654	0	E	FALSE	FALSE	FALSE	TRUE	none	none	none	ARACNe-GTEx	-	-
AEBP2	ZNF678	0	E	FALSE	FALSE	FALSE	TRUE	none	none	none	ARACNe-GTEx	-	-
AEBP2	ZNF720	0	E	FALSE	FALSE	FALSE	TRUE	none	none	none	ARACNe-GTEx	-	-
AEBP2	ZNHIT6	0	E	FALSE	FALSE	FALSE	TRUE	none	none	none	ARACNe-GTEx	-	-
AEBP2	ZZZ3	0	E	FALSE	FALSE	FALSE	TRUE	none	none	none	ARACNe-GTEx	-	-
AHR	A2M	0	E	FALSE	FALSE	FALSE	TRUE	none	none	none	ARACNe-GTEx	-	-
AHR	ABCA8	0	E	FALSE	FALSE	FALSE	TRUE	none	none	none	ARACNe-GTEx	-	-
AHR	ABCB1	0	E	FALSE	FALSE	TRUE	FALSE	none	none	hocomoco_v11	none	-	-
AHR	ABCG2	0	D	TRUE	FALSE	FALSE	FALSE	trrust	none	none	none	20460431	-
AHR	ABHD13	0	E	FALSE	FALSE	FALSE	TRUE	none	none	none	ARACNe-GTEx	-	-
AHR	ABLIM1	0	D	FALSE	TRUE	FALSE	FALSE	none	ReMap	none	none	-	-
AHR	AC006076.1	0	D	FALSE	TRUE	FALSE	FALSE	none	ReMap	none	none	-	-
AHR	AC011284.3	0	D	FALSE	TRUE	FALSE	FALSE	none	ReMap	none	none	-	-
AHR	AC011286.1	0	D	FALSE	TRUE	FALSE	FALSE	none	ReMap	none	none	-	-
AHR	AC011288.2	0	D	FALSE	TRUE	FALSE	FALSE	none	ReMap	none	none	-	-
AHR	AC016768.1	0	D	FALSE	TRUE	FALSE	FALSE	none	ReMap	none	none	-	-
AHR	AC017060.1	0	D	FALSE	TRUE	FALSE	FALSE	none	ReMap	none	none	-	-
AHR	AC026188.1	0	D	FALSE	TRUE	FALSE	FALSE	none	ReMap	none	none	-	-
AHR	AC067956.1	0	D	FALSE	TRUE	FALSE	FALSE	none	ReMap	none	none	-	-
[truncated: 63,536 more rows]
