# Supplementary material for: Benchmark and integration of resources for the estimation of human transcription factor activities
Source: HighWire-hosted journal article supplement (doi:10.1101/gr.240663.118), 2019-07-24
Supplement: Supplemental_Tables.zip [file GarciaAlonso_supplemental_table_S4_regulonsCancer.xlsx]

## Sheet: Sheet 1 - Table S4. Scored TF-t
Table S4. Scored TF-target interactions for cancer tissues. Columns indicate: 1) TF, 2) Target, 3) Effect, 4) Confidence score; 5) logical if from curated database, 6) logical if from ChIPseq, 7) logical if from TF binding motif predictions 8) logical if inferred from TCGA expression data, 9) curated database name, 10) ChIPseq resource name, 10) TF binding motif name, 11) inference strategy name,…
TF	target	effect	score	is_evidence_curateddatabase	is_evidence_chipSeq	is_evidence_TFbindingMotif	is_evidence_coexpressionTCGA	which_curateddatabase	which_chipSeq	which_TFbindingMotif	which_coexpression	pubmedID_from_curated_resources	kegg_pathway
ADNP	ABCC1	0	D	FALSE	TRUE	FALSE	FALSE	none	ReMap	none	none	-	-
ADNP	ABCC6	0	D	FALSE	TRUE	FALSE	FALSE	none	ReMap	none	none	-	-
ADNP	ABHD5	0	D	FALSE	TRUE	FALSE	FALSE	none	ReMap	none	none	-	-
ADNP	ABT1	0	D	FALSE	TRUE	FALSE	FALSE	none	ReMap	none	none	-	-
ADNP	AC002066.1	0	D	FALSE	TRUE	FALSE	FALSE	none	ReMap	none	none	-	-
ADNP	AC002127.4	0	D	FALSE	TRUE	FALSE	FALSE	none	ReMap	none	none	-	-
ADNP	AC005514.2	0	D	FALSE	TRUE	FALSE	FALSE	none	ReMap	none	none	-	-
ADNP	AC006076.1	0	D	FALSE	TRUE	FALSE	FALSE	none	ReMap	none	none	-	-
ADNP	AC006552.1	0	D	FALSE	TRUE	FALSE	FALSE	none	ReMap	none	none	-	-
ADNP	AC007319.1	0	D	FALSE	TRUE	FALSE	FALSE	none	ReMap	none	none	-	-
ADNP	AC007792.1	0	D	FALSE	TRUE	FALSE	FALSE	none	ReMap	none	none	-	-
ADNP	AC010649.1	0	D	FALSE	TRUE	FALSE	FALSE	none	ReMap	none	none	-	-
ADNP	AC011288.2	0	D	FALSE	TRUE	FALSE	FALSE	none	ReMap	none	none	-	-
ADNP	AC024084.1	0	D	FALSE	TRUE	FALSE	FALSE	none	ReMap	none	none	-	-
ADNP	AC073284.4	0	D	FALSE	TRUE	FALSE	FALSE	none	ReMap	none	none	-	-
ADNP	AC092171.4	0	D	FALSE	TRUE	FALSE	FALSE	none	ReMap	none	none	-	-
ADNP	ACBD6	0	D	FALSE	TRUE	FALSE	FALSE	none	ReMap	none	none	-	-
ADNP	ACP7	0	D	FALSE	TRUE	FALSE	FALSE	none	ReMap	none	none	-	-
ADNP	ADAMTS10	0	D	FALSE	TRUE	FALSE	FALSE	none	ReMap	none	none	-	-
ADNP	ADAMTS14	0	D	FALSE	TRUE	FALSE	FALSE	none	ReMap	none	none	-	-
ADNP	ADCY7	0	D	FALSE	TRUE	FALSE	FALSE	none	ReMap	none	none	-	-
ADNP	ADGRG1	0	D	FALSE	TRUE	FALSE	FALSE	none	ReMap	none	none	-	-
ADNP	ADGRV1	0	D	FALSE	TRUE	FALSE	FALSE	none	ReMap	none	none	-	-
ADNP	AHCY	0	D	FALSE	TRUE	FALSE	FALSE	none	ReMap	none	none	-	-
ADNP	AIF1L	0	D	FALSE	TRUE	FALSE	FALSE	none	ReMap	none	none	-	-
ADNP	AIM1L	0	D	FALSE	TRUE	FALSE	FALSE	none	ReMap	none	none	-	-
ADNP	AKNA	0	D	FALSE	TRUE	FALSE	FALSE	none	ReMap	none	none	-	-
ADNP	AKT2	0	D	FALSE	TRUE	FALSE	FALSE	none	ReMap	none	none	-	-
ADNP	ALDH1A1	0	D	FALSE	TRUE	FALSE	FALSE	none	ReMap	none	none	-	-
ADNP	ALDH1A2	0	D	FALSE	TRUE	FALSE	FALSE	none	ReMap	none	none	-	-
ADNP	ALMS1	0	E	FALSE	FALSE	FALSE	TRUE	none	none	none	ARACNe-TCGA	-	-
ADNP	ALX4	0	D	FALSE	TRUE	FALSE	FALSE	none	ReMap	none	none	-	-
ADNP	ANGPT1	0	D	FALSE	TRUE	FALSE	FALSE	none	ReMap	none	none	-	-
ADNP	ANGPTL2	0	D	FALSE	TRUE	FALSE	FALSE	none	ReMap	none	none	-	-
ADNP	ANKRD24	0	D	FALSE	TRUE	FALSE	FALSE	none	ReMap	none	none	-	-
ADNP	ANO6	0	D	FALSE	TRUE	FALSE	FALSE	none	ReMap	none	none	-	-
ADNP	ANTXR2	0	D	FALSE	TRUE	FALSE	FALSE	none	ReMap	none	none	-	-
ADNP	AP000442.4	0	D	FALSE	TRUE	FALSE	FALSE	none	ReMap	none	none	-	-
ADNP	AP1M1	0	D	FALSE	TRUE	FALSE	FALSE	none	ReMap	none	none	-	-
ADNP	ARHGEF1	0	D	FALSE	TRUE	FALSE	FALSE	none	ReMap	none	none	-	-
ADNP	ARHGEF10L	0	D	FALSE	TRUE	FALSE	FALSE	none	ReMap	none	none	-	-
ADNP	ARHGEF37	0	D	FALSE	TRUE	FALSE	FALSE	none	ReMap	none	none	-	-
ADNP	ARID3A	0	D	FALSE	TRUE	FALSE	FALSE	none	ReMap	none	none	-	-
ADNP	ARID5B	0	D	FALSE	TRUE	FALSE	FALSE	none	ReMap	none	none	-	-
ADNP	ARL5A	0	D	FALSE	TRUE	FALSE	FALSE	none	ReMap	none	none	-	-
ADNP	ARPC3P5	0	D	FALSE	TRUE	FALSE	FALSE	none	ReMap	none	none	-	-
ADNP	ASAP1	0	D	FALSE	TRUE	FALSE	FALSE	none	ReMap	none	none	-	-
ADNP	ASCC2	0	D	FALSE	TRUE	FALSE	FALSE	none	ReMap	none	none	-	-
ADNP	ATF7IP	0	D	FALSE	TRUE	FALSE	FALSE	none	ReMap	none	none	-	-
ADNP	ATG14	0	D	FALSE	TRUE	FALSE	FALSE	none	ReMap	none	none	-	-
ADNP	ATP2B1	0	D	FALSE	TRUE	FALSE	FALSE	none	ReMap	none	none	-	-
ADNP	ATP8B3	0	D	FALSE	TRUE	FALSE	FALSE	none	ReMap	none	none	-	-
ADNP	AXL	0	D	FALSE	TRUE	FALSE	FALSE	none	ReMap	none	none	-	-
ADNP	BBC3	0	D	FALSE	TRUE	FALSE	FALSE	none	ReMap	none	none	-	-
ADNP	BHLHE40	0	D	FALSE	TRUE	FALSE	FALSE	none	ReMap	none	none	-	-
ADNP	BLOC1S1	0	E	FALSE	FALSE	FALSE	TRUE	none	none	none	ARACNe-TCGA	-	-
ADNP	BPTF	0	E	FALSE	FALSE	FALSE	TRUE	none	none	none	ARACNe-TCGA	-	-
ADNP	C12ORF76	0	D	FALSE	TRUE	FALSE	FALSE	none	ReMap	none	none	-	-
ADNP	C16ORF45	0	D	FALSE	TRUE	FALSE	FALSE	none	ReMap	none	none	-	-
ADNP	C19ORF66	0	D	FALSE	TRUE	FALSE	FALSE	none	ReMap	none	none	-	-
ADNP	C1ORF100	0	D	FALSE	TRUE	FALSE	FALSE	none	ReMap	none	none	-	-
ADNP	C1ORF127	0	D	FALSE	TRUE	FALSE	FALSE	none	ReMap	none	none	-	-
ADNP	C1ORF167	0	D	FALSE	TRUE	FALSE	FALSE	none	ReMap	none	none	-	-
ADNP	C6ORF223	0	D	FALSE	TRUE	FALSE	FALSE	none	ReMap	none	none	-	-
ADNP	CACNA1A	0	D	FALSE	TRUE	FALSE	FALSE	none	ReMap	none	none	-	-
ADNP	CACNA1I	0	D	FALSE	TRUE	FALSE	FALSE	none	ReMap	none	none	-	-
ADNP	CCDC187	0	D	FALSE	TRUE	FALSE	FALSE	none	ReMap	none	none	-	-
ADNP	CCDC26	0	D	FALSE	TRUE	FALSE	FALSE	none	ReMap	none	none	-	-
ADNP	CCNY	0	D	FALSE	TRUE	FALSE	FALSE	none	ReMap	none	none	-	-
ADNP	CD83P1	0	D	FALSE	TRUE	FALSE	FALSE	none	ReMap	none	none	-	-
ADNP	CDCP1	0	D	FALSE	TRUE	FALSE	FALSE	none	ReMap	none	none	-	-
ADNP	CDH1	0	D	FALSE	TRUE	FALSE	FALSE	none	ReMap	none	none	-	-
ADNP	CDH23	0	D	FALSE	TRUE	FALSE	FALSE	none	ReMap	none	none	-	-
ADNP	CDHR3	0	D	FALSE	TRUE	FALSE	FALSE	none	ReMap	none	none	-	-
ADNP	CDK5RAP2	0	D	FALSE	TRUE	FALSE	FALSE	none	ReMap	none	none	-	-
ADNP	CEBPB	0	D	FALSE	TRUE	FALSE	FALSE	none	ReMap	none	none	-	-
ADNP	CERS6	0	D	FALSE	TRUE	FALSE	FALSE	none	ReMap	none	none	-	-
ADNP	CFAP157	0	D	FALSE	TRUE	FALSE	FALSE	none	ReMap	none	none	-	-
ADNP	CHST11	0	D	FALSE	TRUE	FALSE	FALSE	none	ReMap	none	none	-	-
ADNP	CHST3	0	D	FALSE	TRUE	FALSE	FALSE	none	ReMap	none	none	-	-
ADNP	CIITA	0	D	FALSE	TRUE	FALSE	FALSE	none	ReMap	none	none	-	-
ADNP	CKM	0	D	FALSE	TRUE	FALSE	FALSE	none	ReMap	none	none	-	-
ADNP	CLIP1	0	D	FALSE	TRUE	FALSE	FALSE	none	ReMap	none	none	-	-
ADNP	CLIP2	0	D	FALSE	TRUE	FALSE	FALSE	none	ReMap	none	none	-	-
ADNP	CMIP	0	D	FALSE	TRUE	FALSE	FALSE	none	ReMap	none	none	-	-
ADNP	CMKLR1	0	D	FALSE	TRUE	FALSE	FALSE	none	ReMap	none	none	-	-
ADNP	CNGB1	0	D	FALSE	TRUE	FALSE	FALSE	none	ReMap	none	none	-	-
ADNP	CNKSR3	0	D	FALSE	TRUE	FALSE	FALSE	none	ReMap	none	none	-	-
ADNP	CNN1	0	D	FALSE	TRUE	FALSE	FALSE	none	ReMap	none	none	-	-
ADNP	COL26A1	0	D	FALSE	TRUE	FALSE	FALSE	none	ReMap	none	none	-	-
ADNP	COL27A1	0	D	FALSE	TRUE	FALSE	FALSE	none	ReMap	none	none	-	-
ADNP	COLGALT2	0	D	FALSE	TRUE	FALSE	FALSE	none	ReMap	none	none	-	-
ADNP	CORO2A	0	D	FALSE	TRUE	FALSE	FALSE	none	ReMap	none	none	-	-
ADNP	COX6A1P2	0	D	FALSE	TRUE	FALSE	FALSE	none	ReMap	none	none	-	-
ADNP	CPEB4	0	D	FALSE	TRUE	FALSE	FALSE	none	ReMap	none	none	-	-
ADNP	CPNE2	0	D	FALSE	TRUE	FALSE	FALSE	none	ReMap	none	none	-	-
ADNP	CPPED1	0	D	FALSE	TRUE	FALSE	FALSE	none	ReMap	none	none	-	-
ADNP	CRADD	0	D	FALSE	TRUE	FALSE	FALSE	none	ReMap	none	none	-	-
ADNP	CRB2	0	D	FALSE	TRUE	FALSE	FALSE	none	ReMap	none	none	-	-
ADNP	CRISPLD2	0	D	FALSE	TRUE	FALSE	FALSE	none	ReMap	none	none	-	-
ADNP	CSF3R	0	D	FALSE	TRUE	FALSE	FALSE	none	ReMap	none	none	-	-
ADNP	CTA	0	D	FALSE	TRUE	FALSE	FALSE	none	ReMap	none	none	-	-
ADNP	CTB	0	D	FALSE	TRUE	FALSE	FALSE	none	ReMap	none	none	-	-
ADNP	CTD	0	D	FALSE	TRUE	FALSE	FALSE	none	ReMap	none	none	-	-
ADNP	CTRC	0	D	FALSE	TRUE	FALSE	FALSE	none	ReMap	none	none	-	-
ADNP	CUX1	0	D	FALSE	TRUE	FALSE	FALSE	none	ReMap	none	none	-	-
ADNP	CUX2	0	D	FALSE	TRUE	FALSE	FALSE	none	ReMap	none	none	-	-
ADNP	DAPK2	0	D	FALSE	TRUE	FALSE	FALSE	none	ReMap	none	none	-	-
ADNP	DENND1A	0	D	FALSE	TRUE	FALSE	FALSE	none	ReMap	none	none	-	-
ADNP	DEPDC5	0	D	FALSE	TRUE	FALSE	FALSE	none	ReMap	none	none	-	-
ADNP	DISP3	0	D	FALSE	TRUE	FALSE	FALSE	none	ReMap	none	none	-	-
ADNP	DLGAP4	0	D	FALSE	TRUE	FALSE	FALSE	none	ReMap	none	none	-	-
ADNP	DNAJB12	0	D	FALSE	TRUE	FALSE	FALSE	none	ReMap	none	none	-	-
ADNP	DNAJC6	0	D	FALSE	TRUE	FALSE	FALSE	none	ReMap	none	none	-	-
ADNP	DNM1	0	D	FALSE	TRUE	FALSE	FALSE	none	ReMap	none	none	-	-
ADNP	DNM2	0	D	FALSE	TRUE	FALSE	FALSE	none	ReMap	none	none	-	-
ADNP	DOCK6	0	D	FALSE	TRUE	FALSE	FALSE	none	ReMap	none	none	-	-
ADNP	DPP3	0	D	FALSE	TRUE	FALSE	FALSE	none	ReMap	none	none	-	-
ADNP	DYRK1A	0	D	FALSE	TRUE	FALSE	FALSE	none	ReMap	none	none	-	-
ADNP	E2F2	0	D	FALSE	TRUE	FALSE	FALSE	none	ReMap	none	none	-	-
ADNP	EBI3	0	D	FALSE	TRUE	FALSE	FALSE	none	ReMap	none	none	-	-
ADNP	ECE1	0	D	FALSE	TRUE	FALSE	FALSE	none	ReMap	none	none	-	-
ADNP	EEF2K	0	D	FALSE	TRUE	FALSE	FALSE	none	ReMap	none	none	-	-
ADNP	EHF	0	D	FALSE	TRUE	FALSE	FALSE	none	ReMap	none	none	-	-
ADNP	EIF4E	0	D	FALSE	TRUE	FALSE	FALSE	none	ReMap	none	none	-	-
ADNP	EIF4G3	0	D	FALSE	TRUE	FALSE	FALSE	none	ReMap	none	none	-	-
ADNP	ELFN1	0	D	FALSE	TRUE	FALSE	FALSE	none	ReMap	none	none	-	-
ADNP	ELL2	0	D	FALSE	TRUE	FALSE	FALSE	none	ReMap	none	none	-	-
ADNP	ENG	0	D	FALSE	TRUE	FALSE	FALSE	none	ReMap	none	none	-	-
ADNP	EPB41	0	D	FALSE	TRUE	FALSE	FALSE	none	ReMap	none	none	-	-
ADNP	EPB41L1	0	D	FALSE	TRUE	FALSE	FALSE	none	ReMap	none	none	-	-
ADNP	EPHA2	0	D	FALSE	TRUE	FALSE	FALSE	none	ReMap	none	none	-	-
ADNP	EPHB4	0	D	FALSE	TRUE	FALSE	FALSE	none	ReMap	none	none	-	-
ADNP	ERCC1	0	D	FALSE	TRUE	FALSE	FALSE	none	ReMap	none	none	-	-
ADNP	ERCC2	0	D	FALSE	TRUE	FALSE	FALSE	none	ReMap	none	none	-	-
ADNP	ERN2	0	D	FALSE	TRUE	FALSE	FALSE	none	ReMap	none	none	-	-
ADNP	FAF1	0	D	FALSE	TRUE	FALSE	FALSE	none	ReMap	none	none	-	-
ADNP	FAM129B	0	D	FALSE	TRUE	FALSE	FALSE	none	ReMap	none	none	-	-
ADNP	FAM129C	0	D	FALSE	TRUE	FALSE	FALSE	none	ReMap	none	none	-	-
ADNP	FAM222A	0	D	FALSE	TRUE	FALSE	FALSE	none	ReMap	none	none	-	-
ADNP	FAM46B	0	D	FALSE	TRUE	FALSE	FALSE	none	ReMap	none	none	-	-
ADNP	FAM49B	0	D	FALSE	TRUE	FALSE	FALSE	none	ReMap	none	none	-	-
ADNP	FBN3	0	D	FALSE	TRUE	FALSE	FALSE	none	ReMap	none	none	-	-
ADNP	FBXO21	0	E	FALSE	FALSE	FALSE	TRUE	none	none	none	ARACNe-TCGA	-	-
ADNP	FBXW11	0	D	FALSE	TRUE	FALSE	FALSE	none	ReMap	none	none	-	-
ADNP	FCHO1	0	D	FALSE	TRUE	FALSE	FALSE	none	ReMap	none	none	-	-
ADNP	FHAD1	0	D	FALSE	TRUE	FALSE	FALSE	none	ReMap	none	none	-	-
ADNP	FIBCD1	0	D	FALSE	TRUE	FALSE	FALSE	none	ReMap	none	none	-	-
ADNP	FLNB	0	D	FALSE	TRUE	FALSE	FALSE	none	ReMap	none	none	-	-
ADNP	FNIP2	0	D	FALSE	TRUE	FALSE	FALSE	none	ReMap	none	none	-	-
ADNP	FXN	0	D	FALSE	TRUE	FALSE	FALSE	none	ReMap	none	none	-	-
ADNP	GABBR2	0	D	FALSE	TRUE	FALSE	FALSE	none	ReMap	none	none	-	-
ADNP	GADD45B	0	D	FALSE	TRUE	FALSE	FALSE	none	ReMap	none	none	-	-
ADNP	GDF15	0	D	FALSE	TRUE	FALSE	FALSE	none	ReMap	none	none	-	-
ADNP	GDPD5	0	D	FALSE	TRUE	FALSE	FALSE	none	ReMap	none	none	-	-
ADNP	GFI1B	0	D	FALSE	TRUE	FALSE	FALSE	none	ReMap	none	none	-	-
ADNP	GMPR	0	D	FALSE	TRUE	FALSE	FALSE	none	ReMap	none	none	-	-
ADNP	GNA15	0	D	FALSE	TRUE	FALSE	FALSE	none	ReMap	none	none	-	-
ADNP	GPR160	0	D	FALSE	TRUE	FALSE	FALSE	none	ReMap	none	none	-	-
ADNP	GPR89P	0	D	FALSE	TRUE	FALSE	FALSE	none	ReMap	none	none	-	-
ADNP	GRIFIN	0	D	FALSE	TRUE	FALSE	FALSE	none	ReMap	none	none	-	-
ADNP	GRIP2	0	D	FALSE	TRUE	FALSE	FALSE	none	ReMap	none	none	-	-
ADNP	GRM4	0	D	FALSE	TRUE	FALSE	FALSE	none	ReMap	none	none	-	-
ADNP	GSE1	0	D	FALSE	TRUE	FALSE	FALSE	none	ReMap	none	none	-	-
ADNP	GSN	0	D	FALSE	TRUE	FALSE	FALSE	none	ReMap	none	none	-	-
ADNP	GTDC1	0	D	FALSE	TRUE	FALSE	FALSE	none	ReMap	none	none	-	-
ADNP	GTF2IRD1	0	D	FALSE	TRUE	FALSE	FALSE	none	ReMap	none	none	-	-
ADNP	GUK1	0	E	FALSE	FALSE	FALSE	TRUE	none	none	none	ARACNe-TCGA	-	-
ADNP	HBS1L	0	D	FALSE	TRUE	FALSE	FALSE	none	ReMap	none	none	-	-
ADNP	HFE2	0	D	FALSE	TRUE	FALSE	FALSE	none	ReMap	none	none	-	-
ADNP	HIP1	0	D	FALSE	TRUE	FALSE	FALSE	none	ReMap	none	none	-	-
ADNP	HIST1H3PS1	0	D	FALSE	TRUE	FALSE	FALSE	none	ReMap	none	none	-	-
ADNP	HMGA1P3	0	D	FALSE	TRUE	FALSE	FALSE	none	ReMap	none	none	-	-
ADNP	HMGB1P1	0	D	FALSE	TRUE	FALSE	FALSE	none	ReMap	none	none	-	-
ADNP	HMGB3P32	0	D	FALSE	TRUE	FALSE	FALSE	none	ReMap	none	none	-	-
ADNP	HMGN2P13	0	D	FALSE	TRUE	FALSE	FALSE	none	ReMap	none	none	-	-
ADNP	HMGN2P25	0	D	FALSE	TRUE	FALSE	FALSE	none	ReMap	none	none	-	-
ADNP	HMGN2P47	0	D	FALSE	TRUE	FALSE	FALSE	none	ReMap	none	none	-	-
ADNP	HMGN4	0	D	FALSE	TRUE	FALSE	FALSE	none	ReMap	none	none	-	-
ADNP	HNF1A	0	D	FALSE	TRUE	FALSE	FALSE	none	ReMap	none	none	-	-
ADNP	HNRNPA1P1	0	D	FALSE	TRUE	FALSE	FALSE	none	ReMap	none	none	-	-
ADNP	HSD17B12	0	D	FALSE	TRUE	FALSE	FALSE	none	ReMap	none	none	-	-
ADNP	HTR1D	0	D	FALSE	TRUE	FALSE	FALSE	none	ReMap	none	none	-	-
ADNP	ID1	0	D	FALSE	TRUE	FALSE	FALSE	none	ReMap	none	none	-	-
ADNP	IFFO2	0	D	FALSE	TRUE	FALSE	FALSE	none	ReMap	none	none	-	-
ADNP	IGF2BP2	0	D	FALSE	TRUE	FALSE	FALSE	none	ReMap	none	none	-	-
ADNP	IL12RB1	0	D	FALSE	TRUE	FALSE	FALSE	none	ReMap	none	none	-	-
ADNP	IL21R	0	D	FALSE	TRUE	FALSE	FALSE	none	ReMap	none	none	-	-
ADNP	INPP5B	0	D	FALSE	TRUE	FALSE	FALSE	none	ReMap	none	none	-	-
ADNP	INPP5D	0	D	FALSE	TRUE	FALSE	FALSE	none	ReMap	none	none	-	-
ADNP	INSR	0	D	FALSE	TRUE	FALSE	FALSE	none	ReMap	none	none	-	-
ADNP	IQSEC1	0	D	FALSE	TRUE	FALSE	FALSE	none	ReMap	none	none	-	-
ADNP	IRF2BP1	0	D	FALSE	TRUE	FALSE	FALSE	none	ReMap	none	none	-	-
ADNP	ISPD	0	D	FALSE	TRUE	FALSE	FALSE	none	ReMap	none	none	-	-
ADNP	ITPR1	0	D	FALSE	TRUE	FALSE	FALSE	none	ReMap	none	none	-	-
ADNP	JAK3	0	D	FALSE	TRUE	FALSE	FALSE	none	ReMap	none	none	-	-
ADNP	KAZN	0	D	FALSE	TRUE	FALSE	FALSE	none	ReMap	none	none	-	-
ADNP	KCNK1	0	D	FALSE	TRUE	FALSE	FALSE	none	ReMap	none	none	-	-
ADNP	KCNK3	0	D	FALSE	TRUE	FALSE	FALSE	none	ReMap	none	none	-	-
ADNP	KCNN3	0	D	FALSE	TRUE	FALSE	FALSE	none	ReMap	none	none	-	-
ADNP	KIAA0232	0	D	FALSE	TRUE	FALSE	FALSE	none	ReMap	none	none	-	-
ADNP	KIF13A	0	D	FALSE	TRUE	FALSE	FALSE	none	ReMap	none	none	-	-
ADNP	KSR1	0	D	FALSE	TRUE	FALSE	FALSE	none	ReMap	none	none	-	-
ADNP	LAMC3	0	D	FALSE	TRUE	FALSE	FALSE	none	ReMap	none	none	-	-
ADNP	LAPTM5	0	D	FALSE	TRUE	FALSE	FALSE	none	ReMap	none	none	-	-
ADNP	LASP1	0	D	FALSE	TRUE	FALSE	FALSE	none	ReMap	none	none	-	-
ADNP	LDLRAP1	0	D	FALSE	TRUE	FALSE	FALSE	none	ReMap	none	none	-	-
ADNP	LGR4	0	D	FALSE	TRUE	FALSE	FALSE	none	ReMap	none	none	-	-
ADNP	LHPP	0	D	FALSE	TRUE	FALSE	FALSE	none	ReMap	none	none	-	-
ADNP	LINC00324	0	D	FALSE	TRUE	FALSE	FALSE	none	ReMap	none	none	-	-
ADNP	LINC00534	0	D	FALSE	TRUE	FALSE	FALSE	none	ReMap	none	none	-	-
ADNP	LINC00870	0	D	FALSE	TRUE	FALSE	FALSE	none	ReMap	none	none	-	-
ADNP	LINC00877	0	D	FALSE	TRUE	FALSE	FALSE	none	ReMap	none	none	-	-
ADNP	LINC00963	0	D	FALSE	TRUE	FALSE	FALSE	none	ReMap	none	none	-	-
ADNP	LINC01012	0	D	FALSE	TRUE	FALSE	FALSE	none	ReMap	none	none	-	-
ADNP	LINC01234	0	D	FALSE	TRUE	FALSE	FALSE	none	ReMap	none	none	-	-
ADNP	LINC01267	0	D	FALSE	TRUE	FALSE	FALSE	none	ReMap	none	none	-	-
ADNP	LINC01270	0	D	FALSE	TRUE	FALSE	FALSE	none	ReMap	none	none	-	-
ADNP	LINC01315	0	D	FALSE	TRUE	FALSE	FALSE	none	ReMap	none	none	-	-
ADNP	LINC01412	0	D	FALSE	TRUE	FALSE	FALSE	none	ReMap	none	none	-	-
ADNP	LINC01485	0	D	FALSE	TRUE	FALSE	FALSE	none	ReMap	none	none	-	-
ADNP	LINC01503	0	D	FALSE	TRUE	FALSE	FALSE	none	ReMap	none	none	-	-
ADNP	LINC01556	0	D	FALSE	TRUE	FALSE	FALSE	none	ReMap	none	none	-	-
ADNP	LINC01623	0	D	FALSE	TRUE	FALSE	FALSE	none	ReMap	none	none	-	-
ADNP	LINC01685	0	D	FALSE	TRUE	FALSE	FALSE	none	ReMap	none	none	-	-
ADNP	LINC01756	0	D	FALSE	TRUE	FALSE	FALSE	none	ReMap	none	none	-	-
ADNP	LINC01942	0	D	FALSE	TRUE	FALSE	FALSE	none	ReMap	none	none	-	-
ADNP	LINC01962	0	D	FALSE	TRUE	FALSE	FALSE	none	ReMap	none	none	-	-
ADNP	LINC01992	0	D	FALSE	TRUE	FALSE	FALSE	none	ReMap	none	none	-	-
ADNP	LINGO1	0	D	FALSE	TRUE	FALSE	FALSE	none	ReMap	none	none	-	-
ADNP	LIPC	0	D	FALSE	TRUE	FALSE	FALSE	none	ReMap	none	none	-	-
ADNP	LITAF	0	D	FALSE	TRUE	FALSE	FALSE	none	ReMap	none	none	-	-
ADNP	LLNLR	0	D	FALSE	TRUE	FALSE	FALSE	none	ReMap	none	none	-	-
ADNP	LMO2	0	D	FALSE	TRUE	FALSE	FALSE	none	ReMap	none	none	-	-
ADNP	LUC7L2	0	D	FALSE	TRUE	FALSE	FALSE	none	ReMap	none	none	-	-
ADNP	MAGI1	0	D	FALSE	TRUE	FALSE	FALSE	none	ReMap	none	none	-	-
ADNP	MAP3K7	0	D	FALSE	TRUE	FALSE	FALSE	none	ReMap	none	none	-	-
ADNP	MAPRE2	0	D	FALSE	TRUE	FALSE	FALSE	none	ReMap	none	none	-	-
ADNP	MARK4	0	D	FALSE	TRUE	FALSE	FALSE	none	ReMap	none	none	-	-
ADNP	MAST3	0	D	FALSE	TRUE	FALSE	FALSE	none	ReMap	none	none	-	-
ADNP	MATK	0	D	FALSE	TRUE	FALSE	FALSE	none	ReMap	none	none	-	-
ADNP	MB	0	D	FALSE	TRUE	FALSE	FALSE	none	ReMap	none	none	-	-
ADNP	MBNL1	0	D	FALSE	TRUE	FALSE	FALSE	none	ReMap	none	none	-	-
ADNP	MDM4	0	D	FALSE	TRUE	FALSE	FALSE	none	ReMap	none	none	-	-
ADNP	MDS2	0	D	FALSE	TRUE	FALSE	FALSE	none	ReMap	none	none	-	-
ADNP	MED18	0	D	FALSE	TRUE	FALSE	FALSE	none	ReMap	none	none	-	-
ADNP	METAZOA_SRP.104	0	D	FALSE	TRUE	FALSE	FALSE	none	ReMap	none	none	-	-
ADNP	MICAL2	0	D	FALSE	TRUE	FALSE	FALSE	none	ReMap	none	none	-	-
ADNP	MIER1	0	D	FALSE	TRUE	FALSE	FALSE	none	ReMap	none	none	-	-
ADNP	MIR1205	0	D	FALSE	TRUE	FALSE	FALSE	none	ReMap	none	none	-	-
ADNP	MIR1303	0	D	FALSE	TRUE	FALSE	FALSE	none	ReMap	none	none	-	-
ADNP	MIR145	0	D	FALSE	TRUE	FALSE	FALSE	none	ReMap	none	none	-	-
ADNP	MIR3143	0	D	FALSE	TRUE	FALSE	FALSE	none	ReMap	none	none	-	-
ADNP	MIR3194	0	D	FALSE	TRUE	FALSE	FALSE	none	ReMap	none	none	-	-
ADNP	MIR3681HG	0	D	FALSE	TRUE	FALSE	FALSE	none	ReMap	none	none	-	-
ADNP	MIR3922	0	D	FALSE	TRUE	FALSE	FALSE	none	ReMap	none	none	-	-
ADNP	MIR4418	0	D	FALSE	TRUE	FALSE	FALSE	none	ReMap	none	none	-	-
ADNP	MIR4425	0	D	FALSE	TRUE	FALSE	FALSE	none	ReMap	none	none	-	-
ADNP	MIR4472	0	D	FALSE	TRUE	FALSE	FALSE	none	ReMap	none	none	-	-
ADNP	MIR5093	0	D	FALSE	TRUE	FALSE	FALSE	none	ReMap	none	none	-	-
ADNP	MIR5189	0	D	FALSE	TRUE	FALSE	FALSE	none	ReMap	none	none	-	-
ADNP	MIR7854	0	D	FALSE	TRUE	FALSE	FALSE	none	ReMap	none	none	-	-
ADNP	MLXIPL	0	D	FALSE	TRUE	FALSE	FALSE	none	ReMap	none	none	-	-
ADNP	MN1	0	D	FALSE	TRUE	FALSE	FALSE	none	ReMap	none	none	-	-
ADNP	MRC2	0	D	FALSE	TRUE	FALSE	FALSE	none	ReMap	none	none	-	-
ADNP	MRPS22	0	D	FALSE	TRUE	FALSE	FALSE	none	ReMap	none	none	-	-
ADNP	MTSS1	0	D	FALSE	TRUE	FALSE	FALSE	none	ReMap	none	none	-	-
ADNP	MYB	0	D	FALSE	TRUE	FALSE	FALSE	none	ReMap	none	none	-	-
ADNP	MYL10	0	D	FALSE	TRUE	FALSE	FALSE	none	ReMap	none	none	-	-
ADNP	NCAM2	0	D	FALSE	TRUE	FALSE	FALSE	none	ReMap	none	none	-	-
ADNP	NCLN	0	D	FALSE	TRUE	FALSE	FALSE	none	ReMap	none	none	-	-
ADNP	NCOR2	0	D	FALSE	TRUE	FALSE	FALSE	none	ReMap	none	none	-	-
ADNP	NDST1	0	D	FALSE	TRUE	FALSE	FALSE	none	ReMap	none	none	-	-
ADNP	NEBL	0	D	FALSE	TRUE	FALSE	FALSE	none	ReMap	none	none	-	-
ADNP	NEK6	0	D	FALSE	TRUE	FALSE	FALSE	none	ReMap	none	none	-	-
ADNP	NFAT5	0	D	FALSE	TRUE	FALSE	FALSE	none	ReMap	none	none	-	-
ADNP	NFATC2	0	D	FALSE	TRUE	FALSE	FALSE	none	ReMap	none	none	-	-
ADNP	NFIA	0	D	FALSE	TRUE	FALSE	FALSE	none	ReMap	none	none	-	-
ADNP	NFIC	0	D	FALSE	TRUE	FALSE	FALSE	none	ReMap	none	none	-	-
ADNP	NOP56P1	0	D	FALSE	TRUE	FALSE	FALSE	none	ReMap	none	none	-	-
ADNP	NOSTRIN	0	D	FALSE	TRUE	FALSE	FALSE	none	ReMap	none	none	-	-
ADNP	NPRL3	0	D	FALSE	TRUE	FALSE	FALSE	none	ReMap	none	none	-	-
ADNP	NUP210	0	D	FALSE	TRUE	FALSE	FALSE	none	ReMap	none	none	-	-
ADNP	OAS3	0	D	FALSE	TRUE	FALSE	FALSE	none	ReMap	none	none	-	-
ADNP	PACSIN1	0	D	FALSE	TRUE	FALSE	FALSE	none	ReMap	none	none	-	-
ADNP	PADI4	0	D	FALSE	TRUE	FALSE	FALSE	none	ReMap	none	none	-	-
ADNP	PCBP1	0	D	FALSE	TRUE	FALSE	FALSE	none	ReMap	none	none	-	-
ADNP	PDE4A	0	D	FALSE	TRUE	FALSE	FALSE	none	ReMap	none	none	-	-
ADNP	PDGFB	0	D	FALSE	TRUE	FALSE	FALSE	none	ReMap	none	none	-	-
ADNP	PECAM1	0	D	FALSE	TRUE	FALSE	FALSE	none	ReMap	none	none	-	-
ADNP	PHF20	0	D	FALSE	TRUE	FALSE	FALSE	none	ReMap	none	none	-	-
ADNP	PKHD1L1	0	D	FALSE	TRUE	FALSE	FALSE	none	ReMap	none	none	-	-
ADNP	PKN1	0	D	FALSE	TRUE	FALSE	FALSE	none	ReMap	none	none	-	-
ADNP	PLCG2	0	D	FALSE	TRUE	FALSE	FALSE	none	ReMap	none	none	-	-
ADNP	PLD1	0	D	FALSE	TRUE	FALSE	FALSE	none	ReMap	none	none	-	-
ADNP	PLIN3	0	D	FALSE	TRUE	FALSE	FALSE	none	ReMap	none	none	-	-
ADNP	PLPP7	0	D	FALSE	TRUE	FALSE	FALSE	none	ReMap	none	none	-	-
ADNP	PLXNA2	0	D	FALSE	TRUE	FALSE	FALSE	none	ReMap	none	none	-	-
ADNP	PLXND1	0	D	FALSE	TRUE	FALSE	FALSE	none	ReMap	none	none	-	-
ADNP	POLR2B	0	E	FALSE	FALSE	FALSE	TRUE	none	none	none	ARACNe-TCGA	-	-
ADNP	POM121L2	0	D	FALSE	TRUE	FALSE	FALSE	none	ReMap	none	none	-	-
ADNP	PPIL3	0	D	FALSE	TRUE	FALSE	FALSE	none	ReMap	none	none	-	-
ADNP	PPP1R16B	0	D	FALSE	TRUE	FALSE	FALSE	none	ReMap	none	none	-	-
ADNP	PRCP	0	D	FALSE	TRUE	FALSE	FALSE	none	ReMap	none	none	-	-
ADNP	PREX1	0	D	FALSE	TRUE	FALSE	FALSE	none	ReMap	none	none	-	-
ADNP	PRF1	0	D	FALSE	TRUE	FALSE	FALSE	none	ReMap	none	none	-	-
ADNP	PRKAR2B	0	D	FALSE	TRUE	FALSE	FALSE	none	ReMap	none	none	-	-
ADNP	PRKCB	0	D	FALSE	TRUE	FALSE	FALSE	none	ReMap	none	none	-	-
ADNP	PRR5	0	D	FALSE	TRUE	FALSE	FALSE	none	ReMap	none	none	-	-
ADNP	PRSS16	0	D	FALSE	TRUE	FALSE	FALSE	none	ReMap	none	none	-	-
ADNP	PRX	0	D	FALSE	TRUE	FALSE	FALSE	none	ReMap	none	none	-	-
ADNP	PTP4A2	0	D	FALSE	TRUE	FALSE	FALSE	none	ReMap	none	none	-	-
ADNP	PTP4A3	0	D	FALSE	TRUE	FALSE	FALSE	none	ReMap	none	none	-	-
ADNP	PTPRJ	0	D	FALSE	TRUE	FALSE	FALSE	none	ReMap	none	none	-	-
ADNP	PTPRS	0	D	FALSE	TRUE	FALSE	FALSE	none	ReMap	none	none	-	-
ADNP	PVT1	0	D	FALSE	TRUE	FALSE	FALSE	none	ReMap	none	none	-	-
ADNP	QSER1	0	E	FALSE	FALSE	FALSE	TRUE	none	none	none	ARACNe-TCGA	-	-
ADNP	R3HDM2	0	D	FALSE	TRUE	FALSE	FALSE	none	ReMap	none	none	-	-
ADNP	R3HDM4	0	D	FALSE	TRUE	FALSE	FALSE	none	ReMap	none	none	-	-
ADNP	RALGPS1	0	D	FALSE	TRUE	FALSE	FALSE	none	ReMap	none	none	-	-
ADNP	RANBP9	0	D	FALSE	TRUE	FALSE	FALSE	none	ReMap	none	none	-	-
ADNP	RAP1GAP	0	D	FALSE	TRUE	FALSE	FALSE	none	ReMap	none	none	-	-
ADNP	RAPGEF5	0	D	FALSE	TRUE	FALSE	FALSE	none	ReMap	none	none	-	-
ADNP	RASAL1	0	D	FALSE	TRUE	FALSE	FALSE	none	ReMap	none	none	-	-
ADNP	RBM19	0	D	FALSE	TRUE	FALSE	FALSE	none	ReMap	none	none	-	-
ADNP	RELB	0	D	FALSE	TRUE	FALSE	FALSE	none	ReMap	none	none	-	-
ADNP	RER1	0	E	FALSE	FALSE	FALSE	TRUE	none	none	none	ARACNe-TCGA	-	-
ADNP	RFX1	0	D	FALSE	TRUE	FALSE	FALSE	none	ReMap	none	none	-	-
ADNP	RHOBTB1	0	D	FALSE	TRUE	FALSE	FALSE	none	ReMap	none	none	-	-
ADNP	RHOH	0	D	FALSE	TRUE	FALSE	FALSE	none	ReMap	none	none	-	-
ADNP	RICTOR	0	D	FALSE	TRUE	FALSE	FALSE	none	ReMap	none	none	-	-
ADNP	RN7SL121P	0	D	FALSE	TRUE	FALSE	FALSE	none	ReMap	none	none	-	-
ADNP	RN7SL636P	0	D	FALSE	TRUE	FALSE	FALSE	none	ReMap	none	none	-	-
ADNP	RNASEK	0	E	FALSE	FALSE	FALSE	TRUE	none	none	none	ARACNe-TCGA	-	-
ADNP	RNF10P1	0	D	FALSE	TRUE	FALSE	FALSE	none	ReMap	none	none	-	-
ADNP	RNF216	0	D	FALSE	TRUE	FALSE	FALSE	none	ReMap	none	none	-	-
ADNP	RNU1	0	D	FALSE	TRUE	FALSE	FALSE	none	ReMap	none	none	-	-
ADNP	RNU6	0	D	FALSE	TRUE	FALSE	FALSE	none	ReMap	none	none	-	-
ADNP	RNU7	0	D	FALSE	TRUE	FALSE	FALSE	none	ReMap	none	none	-	-
ADNP	RP1	0	D	FALSE	TRUE	FALSE	FALSE	none	ReMap	none	none	-	-
ADNP	RP11	0	D	FALSE	TRUE	FALSE	FALSE	none	ReMap	none	none	-	-
ADNP	RP3	0	D	FALSE	TRUE	FALSE	FALSE	none	ReMap	none	none	-	-
ADNP	RP4	0	D	FALSE	TRUE	FALSE	FALSE	none	ReMap	none	none	-	-
ADNP	RP5	0	D	FALSE	TRUE	FALSE	FALSE	none	ReMap	none	none	-	-
ADNP	RPH3A	0	D	FALSE	TRUE	FALSE	FALSE	none	ReMap	none	none	-	-
ADNP	RPL10P2	0	D	FALSE	TRUE	FALSE	FALSE	none	ReMap	none	none	-	-
ADNP	RPL12P33	0	D	FALSE	TRUE	FALSE	FALSE	none	ReMap	none	none	-	-
ADNP	RPS10P7	0	D	FALSE	TRUE	FALSE	FALSE	none	ReMap	none	none	-	-
ADNP	RPS4XP19	0	D	FALSE	TRUE	FALSE	FALSE	none	ReMap	none	none	-	-
ADNP	RPSAP2	0	D	FALSE	TRUE	FALSE	FALSE	none	ReMap	none	none	-	-
ADNP	RRAGC	0	D	FALSE	TRUE	FALSE	FALSE	none	ReMap	none	none	-	-
ADNP	RTN4	0	D	FALSE	TRUE	FALSE	FALSE	none	ReMap	none	none	-	-
ADNP	RUNX1	0	D	FALSE	TRUE	FALSE	FALSE	none	ReMap	none	none	-	-
ADNP	S100A13	0	E	FALSE	FALSE	FALSE	TRUE	none	none	none	ARACNe-TCGA	-	-
ADNP	SAMSN1	0	D	FALSE	TRUE	FALSE	FALSE	none	ReMap	none	none	-	-
ADNP	SCARB1	0	D	FALSE	TRUE	FALSE	FALSE	none	ReMap	none	none	-	-
ADNP	SCN1B	0	D	FALSE	TRUE	FALSE	FALSE	none	ReMap	none	none	-	-
ADNP	SDC3	0	D	FALSE	TRUE	FALSE	FALSE	none	ReMap	none	none	-	-
ADNP	SDS	0	D	FALSE	TRUE	FALSE	FALSE	none	ReMap	none	none	-	-
ADNP	SDSL	0	D	FALSE	TRUE	FALSE	FALSE	none	ReMap	none	none	-	-
ADNP	SEC14L1	0	D	FALSE	TRUE	FALSE	FALSE	none	ReMap	none	none	-	-
ADNP	SELPLG	0	D	FALSE	TRUE	FALSE	FALSE	none	ReMap	none	none	-	-
ADNP	SEMA6B	0	D	FALSE	TRUE	FALSE	FALSE	none	ReMap	none	none	-	-
ADNP	SEPT9	0	D	FALSE	TRUE	FALSE	FALSE	none	ReMap	none	none	-	-
ADNP	SERINC5	0	D	FALSE	TRUE	FALSE	FALSE	none	ReMap	none	none	-	-
ADNP	SERPINH1	0	D	FALSE	TRUE	FALSE	FALSE	none	ReMap	none	none	-	-
ADNP	SGSM1	0	D	FALSE	TRUE	FALSE	FALSE	none	ReMap	none	none	-	-
ADNP	SH2B1	0	D	FALSE	TRUE	FALSE	FALSE	none	ReMap	none	none	-	-
ADNP	SIPA1L3	0	D	FALSE	TRUE	FALSE	FALSE	none	ReMap	none	none	-	-
ADNP	SLC13A3	0	D	FALSE	TRUE	FALSE	FALSE	none	ReMap	none	none	-	-
ADNP	SLC1A7	0	D	FALSE	TRUE	FALSE	FALSE	none	ReMap	none	none	-	-
ADNP	SLC22A23	0	D	FALSE	TRUE	FALSE	FALSE	none	ReMap	none	none	-	-
ADNP	SLC25A25	0	D	FALSE	TRUE	FALSE	FALSE	none	ReMap	none	none	-	-
ADNP	SLC29A3	0	D	FALSE	TRUE	FALSE	FALSE	none	ReMap	none	none	-	-
ADNP	SLC44A2	0	D	FALSE	TRUE	FALSE	FALSE	none	ReMap	none	none	-	-
ADNP	SLC4A1	0	D	FALSE	TRUE	FALSE	FALSE	none	ReMap	none	none	-	-
ADNP	SLC6A6	0	D	FALSE	TRUE	FALSE	FALSE	none	ReMap	none	none	-	-
ADNP	SLC7A11	0	D	FALSE	TRUE	FALSE	FALSE	none	ReMap	none	none	-	-
ADNP	SLC8B1	0	D	FALSE	TRUE	FALSE	FALSE	none	ReMap	none	none	-	-
ADNP	SLCO2B1	0	D	FALSE	TRUE	FALSE	FALSE	none	ReMap	none	none	-	-
ADNP	SMARCC1	0	C	FALSE	TRUE	FALSE	TRUE	none	ReMap	none	ARACNe-TCGA	-	-
ADNP	SMC3	0	E	FALSE	FALSE	FALSE	TRUE	none	none	none	ARACNe-TCGA	-	-
ADNP	SMIM25	0	D	FALSE	TRUE	FALSE	FALSE	none	ReMap	none	none	-	-
ADNP	SMURF1	0	D	FALSE	TRUE	FALSE	FALSE	none	ReMap	none	none	-	-
ADNP	SMYD3	0	D	FALSE	TRUE	FALSE	FALSE	none	ReMap	none	none	-	-
ADNP	SNUPN	0	D	FALSE	TRUE	FALSE	FALSE	none	ReMap	none	none	-	-
ADNP	SNX9	0	D	FALSE	TRUE	FALSE	FALSE	none	ReMap	none	none	-	-
ADNP	SOGA1	0	D	FALSE	TRUE	FALSE	FALSE	none	ReMap	none	none	-	-
ADNP	SOX5	0	D	FALSE	TRUE	FALSE	FALSE	none	ReMap	none	none	-	-
ADNP	SPC24	0	D	FALSE	TRUE	FALSE	FALSE	none	ReMap	none	none	-	-
ADNP	SPINT2	0	D	FALSE	TRUE	FALSE	FALSE	none	ReMap	none	none	-	-
ADNP	SPOCD1	0	D	FALSE	TRUE	FALSE	FALSE	none	ReMap	none	none	-	-
ADNP	SPPL3	0	D	FALSE	TRUE	FALSE	FALSE	none	ReMap	none	none	-	-
ADNP	SRC	0	D	FALSE	TRUE	FALSE	FALSE	none	ReMap	none	none	-	-
ADNP	STK10	0	D	FALSE	TRUE	FALSE	FALSE	none	ReMap	none	none	-	-
ADNP	STX18	0	D	FALSE	TRUE	FALSE	FALSE	none	ReMap	none	none	-	-
ADNP	SULT2B1	0	D	FALSE	TRUE	FALSE	FALSE	none	ReMap	none	none	-	-
ADNP	SUMO1P1	0	D	FALSE	TRUE	FALSE	FALSE	none	ReMap	none	none	-	-
ADNP	SYCN	0	D	FALSE	TRUE	FALSE	FALSE	none	ReMap	none	none	-	-
ADNP	SYN3	0	D	FALSE	TRUE	FALSE	FALSE	none	ReMap	none	none	-	-
ADNP	SYNJ2	0	D	FALSE	TRUE	FALSE	FALSE	none	ReMap	none	none	-	-
ADNP	SYT3	0	D	FALSE	TRUE	FALSE	FALSE	none	ReMap	none	none	-	-
ADNP	TAF1B	0	D	FALSE	TRUE	FALSE	FALSE	none	ReMap	none	none	-	-
ADNP	TAOK3	0	D	FALSE	TRUE	FALSE	FALSE	none	ReMap	none	none	-	-
ADNP	TBXAS1	0	D	FALSE	TRUE	FALSE	FALSE	none	ReMap	none	none	-	-
ADNP	TCF3	0	D	FALSE	TRUE	FALSE	FALSE	none	ReMap	none	none	-	-
ADNP	TESC	0	D	FALSE	TRUE	FALSE	FALSE	none	ReMap	none	none	-	-
ADNP	TGM2	0	D	FALSE	TRUE	FALSE	FALSE	none	ReMap	none	none	-	-
ADNP	TJP3	0	D	FALSE	TRUE	FALSE	FALSE	none	ReMap	none	none	-	-
ADNP	TLE2	0	D	FALSE	TRUE	FALSE	FALSE	none	ReMap	none	none	-	-
ADNP	TLK1	0	D	FALSE	TRUE	FALSE	FALSE	none	ReMap	none	none	-	-
ADNP	TMC8	0	D	FALSE	TRUE	FALSE	FALSE	none	ReMap	none	none	-	-
ADNP	TMEM119	0	D	FALSE	TRUE	FALSE	FALSE	none	ReMap	none	none	-	-
ADNP	TMEM132B	0	D	FALSE	TRUE	FALSE	FALSE	none	ReMap	none	none	-	-
ADNP	TMEM212	0	D	FALSE	TRUE	FALSE	FALSE	none	ReMap	none	none	-	-
ADNP	TMEM40	0	D	FALSE	TRUE	FALSE	FALSE	none	ReMap	none	none	-	-
ADNP	TNFRSF1B	0	D	FALSE	TRUE	FALSE	FALSE	none	ReMap	none	none	-	-
ADNP	TNKS	0	E	FALSE	FALSE	FALSE	TRUE	none	none	none	ARACNe-TCGA	-	-
ADNP	TPD52L1	0	D	FALSE	TRUE	FALSE	FALSE	none	ReMap	none	none	-	-
ADNP	TRANK1	0	D	FALSE	TRUE	FALSE	FALSE	none	ReMap	none	none	-	-
ADNP	TRERNA1	0	D	FALSE	TRUE	FALSE	FALSE	none	ReMap	none	none	-	-
ADNP	TRIB1	0	D	FALSE	TRUE	FALSE	FALSE	none	ReMap	none	none	-	-
ADNP	TRIM41	0	D	FALSE	TRUE	FALSE	FALSE	none	ReMap	none	none	-	-
ADNP	TRPV4	0	D	FALSE	TRUE	FALSE	FALSE	none	ReMap	none	none	-	-
ADNP	TSHZ2	0	D	FALSE	TRUE	FALSE	FALSE	none	ReMap	none	none	-	-
ADNP	TSPAN18	0	D	FALSE	TRUE	FALSE	FALSE	none	ReMap	none	none	-	-
ADNP	TTC17	0	E	FALSE	FALSE	FALSE	TRUE	none	none	none	ARACNe-TCGA	-	-
ADNP	TTC39A	0	D	FALSE	TRUE	FALSE	FALSE	none	ReMap	none	none	-	-
ADNP	TXNRD1	0	D	FALSE	TRUE	FALSE	FALSE	none	ReMap	none	none	-	-
ADNP	UBE2F	0	D	FALSE	TRUE	FALSE	FALSE	none	ReMap	none	none	-	-
ADNP	UBR3	0	D	FALSE	TRUE	FALSE	FALSE	none	ReMap	none	none	-	-
ADNP	UNC13A	0	D	FALSE	TRUE	FALSE	FALSE	none	ReMap	none	none	-	-
ADNP	UTP20	0	E	FALSE	FALSE	FALSE	TRUE	none	none	none	ARACNe-TCGA	-	-
ADNP	UTRN	0	D	FALSE	TRUE	FALSE	FALSE	none	ReMap	none	none	-	-
ADNP	VAMP8	0	E	FALSE	FALSE	FALSE	TRUE	none	none	none	ARACNe-TCGA	-	-
ADNP	VCL	0	D	FALSE	TRUE	FALSE	FALSE	none	ReMap	none	none	-	-
ADNP	VWCE	0	D	FALSE	TRUE	FALSE	FALSE	none	ReMap	none	none	-	-
ADNP	WNT4	0	D	FALSE	TRUE	FALSE	FALSE	none	ReMap	none	none	-	-
ADNP	WSCD2	0	D	FALSE	TRUE	FALSE	FALSE	none	ReMap	none	none	-	-
ADNP	XPR1	0	D	FALSE	TRUE	FALSE	FALSE	none	ReMap	none	none	-	-
ADNP	XXBAC	0	D	FALSE	TRUE	FALSE	FALSE	none	ReMap	none	none	-	-
ADNP	XXYLT1	0	D	FALSE	TRUE	FALSE	FALSE	none	ReMap	none	none	-	-
ADNP	Y_RNA.478	0	D	FALSE	TRUE	FALSE	FALSE	none	ReMap	none	none	-	-
ADNP	ZCCHC11	0	D	FALSE	TRUE	FALSE	FALSE	none	ReMap	none	none	-	-
ADNP	ZDHHC14	0	D	FALSE	TRUE	FALSE	FALSE	none	ReMap	none	none	-	-
ADNP	ZFP36L2	0	D	FALSE	TRUE	FALSE	FALSE	none	ReMap	none	none	-	-
ADNP	ZKSCAN1	0	E	FALSE	FALSE	FALSE	TRUE	none	none	none	ARACNe-TCGA	-	-
ADNP	ZMIZ1	0	D	FALSE	TRUE	FALSE	FALSE	none	ReMap	none	none	-	-
ADNP	ZMYM2	0	E	FALSE	FALSE	FALSE	TRUE	none	none	none	ARACNe-TCGA	-	-
ADNP	ZMYM4	0	D	FALSE	TRUE	FALSE	FALSE	none	ReMap	none	none	-	-
ADNP	ZMYND8	0	D	FALSE	TRUE	FALSE	FALSE	none	ReMap	none	none	-	-
ADNP	ZNF217	0	D	FALSE	TRUE	FALSE	FALSE	none	ReMap	none	none	-	-
ADNP	ZNF317	0	E	FALSE	FALSE	FALSE	TRUE	none	none	none	ARACNe-TCGA	-	-
ADNP	ZNF618	0	D	FALSE	TRUE	FALSE	FALSE	none	ReMap	none	none	-	-
ADNP	ZSCAN25	0	E	FALSE	FALSE	FALSE	TRUE	none	none	none	ARACNe-TCGA	-	-
ADNP2	CCNT1	0	E	FALSE	FALSE	FALSE	TRUE	none	none	none	ARACNe-TCGA	-	-
ADNP2	CTDP1	0	E	FALSE	FALSE	FALSE	TRUE	none	none	none	ARACNe-TCGA	-	-
ADNP2	KLHL11	0	E	FALSE	FALSE	FALSE	TRUE	none	none	none	ARACNe-TCGA	-	-
ADNP2	RBM12	0	E	FALSE	FALSE	FALSE	TRUE	none	none	none	ARACNe-TCGA	-	-
AEBP2	GPAA1	0	E	FALSE	FALSE	FALSE	TRUE	none	none	none	ARACNe-TCGA	-	-
AEBP2	KDM5A	0	E	FALSE	FALSE	FALSE	TRUE	none	none	none	ARACNe-TCGA	-	-
AHR	ABCB1	0	E	FALSE	FALSE	TRUE	FALSE	none	none	hocomoco_v11	none	-	-
AHR	ABCG2	0	D	TRUE	FALSE	FALSE	FALSE	trrust	none	none	none	20460431	-
AHR	ABLIM1	0	D	FALSE	TRUE	FALSE	FALSE	none	ReMap	none	none	-	-
AHR	AC006076.1	0	D	FALSE	TRUE	FALSE	FALSE	none	ReMap	none	none	-	-
AHR	AC011284.3	0	D	FALSE	TRUE	FALSE	FALSE	none	ReMap	none	none	-	-
AHR	AC011286.1	0	D	FALSE	TRUE	FALSE	FALSE	none	ReMap	none	none	-	-
AHR	AC011288.2	0	D	FALSE	TRUE	FALSE	FALSE	none	ReMap	none	none	-	-
AHR	AC016768.1	0	D	FALSE	TRUE	FALSE	FALSE	none	ReMap	none	none	-	-
AHR	AC017060.1	0	D	FALSE	TRUE	FALSE	FALSE	none	ReMap	none	none	-	-
AHR	AC026188.1	0	D	FALSE	TRUE	FALSE	FALSE	none	ReMap	none	none	-	-
AHR	AC067956.1	0	D	FALSE	TRUE	FALSE	FALSE	none	ReMap	none	none	-	-
AHR	AC074391.1	0	D	FALSE	TRUE	FALSE	FALSE	none	ReMap	none	none	-	-
AHR	AC093901.1	0	D	FALSE	TRUE	FALSE	FALSE	none	ReMap	none	none	-	-
AHR	AC136289.1	0	D	FALSE	TRUE	FALSE	FALSE	none	ReMap	none	none	-	-
AHR	ACACA	0	E	FALSE	FALSE	TRUE	FALSE	none	none	hocomoco_v11	none	-	-
AHR	ACBD5	0	E	FALSE	FALSE	TRUE	FALSE	none	none	hocomoco_v11	none	-	-
AHR	ACBD6	0	E	FALSE	FALSE	TRUE	FALSE	none	none	hocomoco_v11	none	-	-
AHR	ACOXL	0	D	FALSE	TRUE	FALSE	FALSE	none	ReMap	none	none	-	-
AHR	ACP2	0	E	FALSE	FALSE	TRUE	FALSE	none	none	hocomoco_v11	none	-	-
AHR	ACP5	0	E	FALSE	FALSE	TRUE	FALSE	none	none	hocomoco_v11	none	-	-
AHR	ADAMDEC1	0	E	FALSE	FALSE	TRUE	FALSE	none	none	hocomoco_v11	none	-	-
AHR	ADAMTS13	0	E	FALSE	FALSE	TRUE	FALSE	none	none	hocomoco_v11	none	-	-
AHR	ADAMTS17	0	D	FALSE	TRUE	FALSE	FALSE	none	ReMap	none	none	-	-
AHR	ADAMTS6	0	E	FALSE	FALSE	TRUE	FALSE	none	none	hocomoco_v11	none	-	-
AHR	ADAMTS9	0	D	FALSE	TRUE	FALSE	FALSE	none	ReMap	none	none	-	-
AHR	ADAMTSL1	0	D	FALSE	TRUE	FALSE	FALSE	none	ReMap	none	none	-	-
AHR	ADAP2	0	E	FALSE	FALSE	TRUE	FALSE	none	none	hocomoco_v11	none	-	-
AHR	ADARB2	0	D	FALSE	TRUE	FALSE	FALSE	none	ReMap	none	none	-	-
AHR	ADCY5	0	D	FALSE	TRUE	FALSE	FALSE	none	ReMap	none	none	-	-
AHR	ADGRV1	0	D	FALSE	TRUE	FALSE	FALSE	none	ReMap	none	none	-	-
AHR	ADORA2A	0	E	FALSE	FALSE	TRUE	FALSE	none	none	hocomoco_v11	none	-	-
AHR	AFF3	0	D	FALSE	TRUE	FALSE	FALSE	none	ReMap	none	none	-	-
AHR	AGAP1	0	D	FALSE	TRUE	FALSE	FALSE	none	ReMap	none	none	-	-
AHR	AGAP3	0	E	FALSE	FALSE	TRUE	FALSE	none	none	hocomoco_v11	none	-	-
AHR	AGBL2	0	E	FALSE	FALSE	TRUE	FALSE	none	none	hocomoco_v11	none	-	-
AHR	AGO1	0	E	FALSE	FALSE	TRUE	FALSE	none	none	hocomoco_v11	none	-	-
AHR	AGPAT5	0	E	FALSE	FALSE	TRUE	FALSE	none	none	hocomoco_v11	none	-	-
AHR	AHCYL1	0	E	FALSE	FALSE	TRUE	FALSE	none	none	hocomoco_v11	none	-	-
AHR	AHRR	1	D	TRUE	FALSE	FALSE	FALSE	trrust	none	none	none	18848529	-
AHR	AKAP13	0	D	FALSE	TRUE	FALSE	FALSE	none	ReMap	none	none	-	-
AHR	AKAP6	0	D	FALSE	TRUE	FALSE	FALSE	none	ReMap	none	none	-	-
AHR	AKR1E2	0	E	FALSE	FALSE	TRUE	FALSE	none	none	hocomoco_v11	none	-	-
AHR	AL163953.3	0	D	FALSE	TRUE	FALSE	FALSE	none	ReMap	none	none	-	-
AHR	ALCAM	0	D	FALSE	TRUE	FALSE	FALSE	none	ReMap	none	none	-	-
AHR	ALDH1A2	0	D	FALSE	TRUE	FALSE	FALSE	none	ReMap	none	none	-	-
AHR	ALG9	0	E	FALSE	FALSE	TRUE	FALSE	none	none	hocomoco_v11	none	-	-
AHR	ALK	0	D	FALSE	TRUE	FALSE	FALSE	none	ReMap	none	none	-	-
AHR	ALKBH2	0	E	FALSE	FALSE	TRUE	FALSE	none	none	hocomoco_v11	none	-	-
AHR	ALOX5AP	0	E	FALSE	FALSE	TRUE	FALSE	none	none	hocomoco_v11	none	-	-
AHR	AMBN	0	E	FALSE	FALSE	TRUE	FALSE	none	none	hocomoco_v11	none	-	-
AHR	AMBRA1	0	D	FALSE	TRUE	FALSE	FALSE	none	ReMap	none	none	-	-
AHR	AMPD2	0	E	FALSE	FALSE	TRUE	FALSE	none	none	hocomoco_v11	none	-	-
AHR	ANGPT1	0	D	FALSE	TRUE	FALSE	FALSE	none	ReMap	none	none	-	-
AHR	ANK3	0	D	FALSE	TRUE	FALSE	FALSE	none	ReMap	none	none	-	-
AHR	ANKFN1	0	D	FALSE	TRUE	FALSE	FALSE	none	ReMap	none	none	-	-
AHR	ANKRD11	0	E	FALSE	FALSE	TRUE	FALSE	none	none	hocomoco_v11	none	-	-
AHR	ANKRD28	0	D	FALSE	TRUE	FALSE	FALSE	none	ReMap	none	none	-	-
AHR	ANKS1B	0	D	FALSE	TRUE	FALSE	FALSE	none	ReMap	none	none	-	-
AHR	ANO2	0	D	FALSE	TRUE	FALSE	FALSE	none	ReMap	none	none	-	-
AHR	ANPEP	0	E	FALSE	FALSE	TRUE	FALSE	none	none	hocomoco_v11	none	-	-
AHR	AP3S1	0	E	FALSE	FALSE	TRUE	FALSE	none	none	hocomoco_v11	none	-	-
AHR	AP4E1	0	E	FALSE	FALSE	TRUE	FALSE	none	none	hocomoco_v11	none	-	-
AHR	APBB2	0	E	FALSE	FALSE	TRUE	FALSE	none	none	hocomoco_v11	none	-	-
AHR	ARHGAP12	0	E	FALSE	FALSE	FALSE	TRUE	none	none	none	ARACNe-TCGA	-	-
AHR	ARHGAP15	0	D	FALSE	TRUE	FALSE	FALSE	none	ReMap	none	none	-	-
AHR	ARHGAP24	0	D	FALSE	TRUE	FALSE	FALSE	none	ReMap	none	none	-	-
AHR	ARHGAP26	0	D	FALSE	TRUE	FALSE	FALSE	none	ReMap	none	none	-	-
AHR	ARHGAP36	0	E	FALSE	FALSE	TRUE	FALSE	none	none	hocomoco_v11	none	-	-
AHR	ARHGEF28	0	D	FALSE	TRUE	FALSE	FALSE	none	ReMap	none	none	-	-
AHR	ARID5B	0	D	FALSE	TRUE	FALSE	FALSE	none	ReMap	none	none	-	-
AHR	ARL17B	0	E	FALSE	FALSE	TRUE	FALSE	none	none	hocomoco_v11	none	-	-
AHR	ARNT	0	D	TRUE	FALSE	FALSE	FALSE	trrust	none	none	none	19255421,8631989	-
AHR	ASAP1	0	C	FALSE	TRUE	TRUE	FALSE	none	ReMap	hocomoco_v11	none	-	-
AHR	ASAP2	0	E	FALSE	FALSE	TRUE	FALSE	none	none	hocomoco_v11	none	-	-
AHR	ASZ1	0	E	FALSE	FALSE	TRUE	FALSE	none	none	hocomoco_v11	none	-	-
AHR	ATAD3A	0	E	FALSE	FALSE	TRUE	FALSE	none	none	hocomoco_v11	none	-	-
AHR	ATG12	0	E	FALSE	FALSE	TRUE	FALSE	none	none	hocomoco_v11	none	-	-
AHR	ATOH1	0	E	FALSE	FALSE	TRUE	FALSE	none	none	hocomoco_v11	none	-	-
AHR	ATP2B2	0	D	FALSE	TRUE	FALSE	FALSE	none	ReMap	none	none	-	-
AHR	ATP5D	0	E	FALSE	FALSE	TRUE	FALSE	none	none	hocomoco_v11	none	-	-
AHR	ATP8A2	0	D	FALSE	TRUE	FALSE	FALSE	none	ReMap	none	none	-	-
AHR	ATP8B4	0	D	FALSE	TRUE	FALSE	FALSE	none	ReMap	none	none	-	-
AHR	ATPIF1	0	E	FALSE	FALSE	TRUE	FALSE	none	none	hocomoco_v11	none	-	-
AHR	ATRNL1	0	D	FALSE	TRUE	FALSE	FALSE	none	ReMap	none	none	-	-
AHR	ATXN7	0	D	FALSE	TRUE	FALSE	FALSE	none	ReMap	none	none	-	-
AHR	ATXN7L1	0	D	FALSE	TRUE	FALSE	FALSE	none	ReMap	none	none	-	-
AHR	AUTS2	0	D	FALSE	TRUE	FALSE	FALSE	none	ReMap	none	none	-	-
AHR	AXIN2	0	E	FALSE	FALSE	TRUE	FALSE	none	none	hocomoco_v11	none	-	-
AHR	BBS9	0	D	FALSE	TRUE	FALSE	FALSE	none	ReMap	none	none	-	-
AHR	BBX	0	D	FALSE	TRUE	FALSE	FALSE	none	ReMap	none	none	-	-
AHR	BCAR3	0	D	FALSE	TRUE	FALSE	FALSE	none	ReMap	none	none	-	-
AHR	BCAS1	0	D	FALSE	TRUE	FALSE	FALSE	none	ReMap	none	none	-	-
AHR	BCAS3	0	D	FALSE	TRUE	FALSE	FALSE	none	ReMap	none	none	-	-
AHR	BIRC3	0	E	FALSE	FALSE	TRUE	FALSE	none	none	hocomoco_v11	none	-	-
AHR	BMP7	0	D	FALSE	TRUE	FALSE	FALSE	none	ReMap	none	none	-	-
AHR	BMP8B	0	E	FALSE	FALSE	TRUE	FALSE	none	none	hocomoco_v11	none	-	-
AHR	BMPR1A	0	E	FALSE	FALSE	TRUE	FALSE	none	none	hocomoco_v11	none	-	-
AHR	BMPR1B	0	D	FALSE	TRUE	FALSE	FALSE	none	ReMap	none	none	-	-
AHR	BRCA1	0	D	TRUE	FALSE	FALSE	FALSE	trrust	none	none	none	18259752	-
AHR	BRCA2	0	E	FALSE	FALSE	TRUE	FALSE	none	none	hocomoco_v11	none	-	-
AHR	BRINP1	0	D	FALSE	TRUE	FALSE	FALSE	none	ReMap	none	none	-	-
AHR	BRIP1	0	D	FALSE	TRUE	FALSE	FALSE	none	ReMap	none	none	-	-
AHR	C10ORF11	0	D	FALSE	TRUE	FALSE	FALSE	none	ReMap	none	none	-	-
AHR	C12orf73	0	E	FALSE	FALSE	TRUE	FALSE	none	none	hocomoco_v11	none	-	-
AHR	C15orf48	0	E	FALSE	FALSE	TRUE	FALSE	none	none	hocomoco_v11	none	-	-
AHR	C18orf63	0	E	FALSE	FALSE	TRUE	FALSE	none	none	hocomoco_v11	none	-	-
AHR	C1S	0	E	FALSE	FALSE	TRUE	FALSE	none	none	hocomoco_v11	none	-	-
AHR	C2CD2	0	E	FALSE	FALSE	TRUE	FALSE	none	none	hocomoco_v11	none	-	-
AHR	C3orf70	0	E	FALSE	FALSE	TRUE	FALSE	none	none	hocomoco_v11	none	-	-
AHR	C8ORF37	0	D	FALSE	TRUE	FALSE	FALSE	none	ReMap	none	none	-	-
AHR	C9ORF3	0	D	FALSE	TRUE	FALSE	FALSE	none	ReMap	none	none	-	-
AHR	CA10	0	D	FALSE	TRUE	FALSE	FALSE	none	ReMap	none	none	-	-
AHR	CA9	-1	D	TRUE	FALSE	FALSE	FALSE	trrust	none	none	none	19154183	-
AHR	CACHD1	0	E	FALSE	FALSE	TRUE	FALSE	none	none	hocomoco_v11	none	-	-
AHR	CACNA1A	0	D	FALSE	TRUE	FALSE	FALSE	none	ReMap	none	none	-	-
AHR	CACNA1C	0	E	FALSE	FALSE	TRUE	FALSE	none	none	hocomoco_v11	none	-	-
AHR	CACNA1D	0	D	FALSE	TRUE	FALSE	FALSE	none	ReMap	none	none	-	-
AHR	CACNA1E	0	D	FALSE	TRUE	FALSE	FALSE	none	ReMap	none	none	-	-
AHR	CACNA2D1	0	D	FALSE	TRUE	FALSE	FALSE	none	ReMap	none	none	-	-
AHR	CACNA2D3	0	D	FALSE	TRUE	FALSE	FALSE	none	ReMap	none	none	-	-
AHR	CACNB2	0	D	FALSE	TRUE	FALSE	FALSE	none	ReMap	none	none	-	-
AHR	CADPS	0	D	FALSE	TRUE	FALSE	FALSE	none	ReMap	none	none	-	-
AHR	CALN1	0	D	FALSE	TRUE	FALSE	FALSE	none	ReMap	none	none	-	-
AHR	CAMKMT	0	D	FALSE	TRUE	FALSE	FALSE	none	ReMap	none	none	-	-
AHR	CARS	0	E	FALSE	FALSE	TRUE	FALSE	none	none	hocomoco_v11	none	-	-
AHR	CARSP2	0	D	FALSE	TRUE	FALSE	FALSE	none	ReMap	none	none	-	-
AHR	CASC15	0	D	FALSE	TRUE	FALSE	FALSE	none	ReMap	none	none	-	-
AHR	CASR	0	E	FALSE	FALSE	TRUE	FALSE	none	none	hocomoco_v11	none	-	-
AHR	CBLB	0	D	FALSE	TRUE	FALSE	FALSE	none	ReMap	none	none	-	-
AHR	CBLN3	0	E	FALSE	FALSE	TRUE	FALSE	none	none	hocomoco_v11	none	-	-
AHR	CCDC162P	0	D	FALSE	TRUE	FALSE	FALSE	none	ReMap	none	none	-	-
AHR	CCDC81	0	E	FALSE	FALSE	TRUE	FALSE	none	none	hocomoco_v11	none	-	-
AHR	CCND1	0	D	TRUE	FALSE	FALSE	FALSE	trrust	none	none	none	24380854	-
AHR	CCNG2	1	D	TRUE	FALSE	FALSE	FALSE	trrust	none	none	none	22596188	-
AHR	CCNL2	0	E	FALSE	FALSE	TRUE	FALSE	none	none	hocomoco_v11	none	-	-
AHR	CDC20	0	E	FALSE	FALSE	TRUE	FALSE	none	none	hocomoco_v11	none	-	-
AHR	CDH12	0	D	FALSE	TRUE	FALSE	FALSE	none	ReMap	none	none	-	-
AHR	CDH13	0	D	FALSE	TRUE	FALSE	FALSE	none	ReMap	none	none	-	-
AHR	CDH18	0	D	FALSE	TRUE	FALSE	FALSE	none	ReMap	none	none	-	-
AHR	CDH4	0	D	FALSE	TRUE	FALSE	FALSE	none	ReMap	none	none	-	-
AHR	CDHR3	0	D	FALSE	TRUE	FALSE	FALSE	none	ReMap	none	none	-	-
AHR	CDK14	0	D	FALSE	TRUE	FALSE	FALSE	none	ReMap	none	none	-	-
AHR	CDK5RAP2	0	D	FALSE	TRUE	FALSE	FALSE	none	ReMap	none	none	-	-
AHR	CDYL	0	D	FALSE	TRUE	FALSE	FALSE	none	ReMap	none	none	-	-
AHR	CENPH	0	E	FALSE	FALSE	TRUE	FALSE	none	none	hocomoco_v11	none	-	-
AHR	CENPV	0	E	FALSE	FALSE	TRUE	FALSE	none	none	hocomoco_v11	none	-	-
AHR	CEP112	0	D	FALSE	TRUE	FALSE	FALSE	none	ReMap	none	none	-	-
AHR	CEP128	0	D	FALSE	TRUE	FALSE	FALSE	none	ReMap	none	none	-	-
AHR	CEP19	0	E	FALSE	FALSE	TRUE	FALSE	none	none	hocomoco_v11	none	-	-
AHR	CERCAM	0	E	FALSE	FALSE	TRUE	FALSE	none	none	hocomoco_v11	none	-	-
AHR	CHCHD6	0	D	FALSE	TRUE	FALSE	FALSE	none	ReMap	none	none	-	-
AHR	CHD6	0	D	FALSE	TRUE	FALSE	FALSE	none	ReMap	none	none	-	-
AHR	CHN2	0	D	FALSE	TRUE	FALSE	FALSE	none	ReMap	none	none	-	-
AHR	CLASP1	0	E	FALSE	FALSE	TRUE	FALSE	none	none	hocomoco_v11	none	-	-
AHR	CLDN10	0	E	FALSE	FALSE	TRUE	FALSE	none	none	hocomoco_v11	none	-	-
AHR	CLIC5	0	D	FALSE	TRUE	FALSE	FALSE	none	ReMap	none	none	-	-
AHR	CLMN	0	D	FALSE	TRUE	FALSE	FALSE	none	ReMap	none	none	-	-
AHR	CMSS1	0	E	FALSE	FALSE	TRUE	FALSE	none	none	hocomoco_v11	none	-	-
AHR	CNBD1	0	D	FALSE	TRUE	FALSE	FALSE	none	ReMap	none	none	-	-
AHR	CNTN3	0	D	FALSE	TRUE	FALSE	FALSE	none	ReMap	none	none	-	-
AHR	CNTN4	0	D	FALSE	TRUE	FALSE	FALSE	none	ReMap	none	none	-	-
AHR	CNTNAP2	0	D	FALSE	TRUE	FALSE	FALSE	none	ReMap	none	none	-	-
AHR	COASY	0	E	FALSE	FALSE	TRUE	FALSE	none	none	hocomoco_v11	none	-	-
AHR	COG3	0	E	FALSE	FALSE	TRUE	FALSE	none	none	hocomoco_v11	none	-	-
AHR	COL14A1	0	D	FALSE	TRUE	FALSE	FALSE	none	ReMap	none	none	-	-
AHR	COL21A1	0	D	FALSE	TRUE	FALSE	FALSE	none	ReMap	none	none	-	-
AHR	COL22A1	0	D	FALSE	TRUE	FALSE	FALSE	none	ReMap	none	none	-	-
AHR	COL4A3BP	0	E	FALSE	FALSE	TRUE	FALSE	none	none	hocomoco_v11	none	-	-
AHR	COLQ	0	E	FALSE	FALSE	TRUE	FALSE	none	none	hocomoco_v11	none	-	-
AHR	CPNE3	0	E	FALSE	FALSE	TRUE	FALSE	none	none	hocomoco_v11	none	-	-
AHR	CPNE4	0	D	FALSE	TRUE	FALSE	FALSE	none	ReMap	none	none	-	-
AHR	CPQ	0	D	FALSE	TRUE	FALSE	FALSE	none	ReMap	none	none	-	-
AHR	CRAT40	0	D	FALSE	TRUE	FALSE	FALSE	none	ReMap	none	none	-	-
AHR	CREB5	0	D	FALSE	TRUE	FALSE	FALSE	none	ReMap	none	none	-	-
AHR	CRH	0	E	FALSE	FALSE	TRUE	FALSE	none	none	hocomoco_v11	none	-	-
AHR	CSMD1	0	D	FALSE	TRUE	FALSE	FALSE	none	ReMap	none	none	-	-
AHR	CSMD2	0	D	FALSE	TRUE	FALSE	FALSE	none	ReMap	none	none	-	-
AHR	CSMD3	0	D	FALSE	TRUE	FALSE	FALSE	none	ReMap	none	none	-	-
AHR	CSRP2	0	E	FALSE	FALSE	TRUE	FALSE	none	none	hocomoco_v11	none	-	-
AHR	CTD	0	D	FALSE	TRUE	FALSE	FALSE	none	ReMap	none	none	-	-
AHR	CTNNA1	0	D	FALSE	TRUE	FALSE	FALSE	none	ReMap	none	none	-	-
AHR	CTNNA2	0	C	FALSE	TRUE	TRUE	FALSE	none	ReMap	hocomoco_v11	none	-	-
AHR	CTNNA3	0	D	FALSE	TRUE	FALSE	FALSE	none	ReMap	none	none	-	-
AHR	CTNNBL1	0	D	FALSE	TRUE	FALSE	FALSE	none	ReMap	none	none	-	-
AHR	CTNND2	0	D	FALSE	TRUE	FALSE	FALSE	none	ReMap	none	none	-	-
AHR	CTSA	0	E	FALSE	FALSE	TRUE	FALSE	none	none	hocomoco_v11	none	-	-
AHR	CUX1	0	D	FALSE	TRUE	FALSE	FALSE	none	ReMap	none	none	-	-
AHR	CXorf49B	0	E	FALSE	FALSE	TRUE	FALSE	none	none	hocomoco_v11	none	-	-
AHR	CYP1A1	1	A	TRUE	FALSE	TRUE	FALSE	HTRIdb,trrust	none	hocomoco_v11	none	9698073,17785579,10359656,16972788,12213390,9865727	-
AHR	CYP1A2	0	A	TRUE	FALSE	FALSE	FALSE	HTRIdb,trrust	none	none	none	17785579,21357676	-
AHR	CYP1B1	1	A	TRUE	FALSE	TRUE	FALSE	HTRIdb,trrust	none	hocomoco_v11	none	17785579,12801909,16115918,19287966	-
AHR	CYP24A1	0	D	FALSE	TRUE	FALSE	FALSE	none	ReMap	none	none	-	-
AHR	CYP2B6	0	D	TRUE	FALSE	FALSE	FALSE	trrust	none	none	none	19928584	-
AHR	DAPK1	0	D	FALSE	TRUE	FALSE	FALSE	none	ReMap	none	none	-	-
AHR	DAPP1	0	E	FALSE	FALSE	TRUE	FALSE	none	none	hocomoco_v11	none	-	-
AHR	DCLK1	0	D	FALSE	TRUE	FALSE	FALSE	none	ReMap	none	none	-	-
AHR	DCLRE1C	0	E	FALSE	FALSE	TRUE	FALSE	none	none	hocomoco_v11	none	-	-
AHR	DCN	0	E	FALSE	FALSE	TRUE	FALSE	none	none	hocomoco_v11	none	-	-
AHR	DCXR	0	E	FALSE	FALSE	TRUE	FALSE	none	none	hocomoco_v11	none	-	-
AHR	DDX3X	0	E	FALSE	FALSE	TRUE	FALSE	none	none	hocomoco_v11	none	-	-
AHR	DEDD2	0	E	FALSE	FALSE	TRUE	FALSE	none	none	hocomoco_v11	none	-	-
AHR	DENND1A	0	D	FALSE	TRUE	FALSE	FALSE	none	ReMap	none	none	-	-
AHR	DGAT1	0	E	FALSE	FALSE	TRUE	FALSE	none	none	hocomoco_v11	none	-	-
AHR	DGKB	0	D	FALSE	TRUE	FALSE	FALSE	none	ReMap	none	none	-	-
AHR	DGKG	0	D	FALSE	TRUE	FALSE	FALSE	none	ReMap	none	none	-	-
AHR	DGKI	0	D	FALSE	TRUE	FALSE	FALSE	none	ReMap	none	none	-	-
AHR	DHRS4	0	E	FALSE	FALSE	TRUE	FALSE	none	none	hocomoco_v11	none	-	-
AHR	DHRS4L2	0	E	FALSE	FALSE	TRUE	FALSE	none	none	hocomoco_v11	none	-	-
AHR	DIEXF	0	E	FALSE	FALSE	TRUE	FALSE	none	none	hocomoco_v11	none	-	-
AHR	DIO2	0	D	FALSE	TRUE	FALSE	FALSE	none	ReMap	none	none	-	-
AHR	DIP2C	0	D	FALSE	TRUE	FALSE	FALSE	none	ReMap	none	none	-	-
AHR	DIRC3	0	D	FALSE	TRUE	FALSE	FALSE	none	ReMap	none	none	-	-
AHR	DLC1	0	E	FALSE	FALSE	TRUE	FALSE	none	none	hocomoco_v11	none	-	-
AHR	DLG1	0	D	FALSE	TRUE	FALSE	FALSE	none	ReMap	none	none	-	-
AHR	DLG2	0	D	FALSE	TRUE	FALSE	FALSE	none	ReMap	none	none	-	-
AHR	DMD	0	D	FALSE	TRUE	FALSE	FALSE	none	ReMap	none	none	-	-
AHR	DMXL2	0	D	FALSE	TRUE	FALSE	FALSE	none	ReMap	none	none	-	-
AHR	DNAH11	0	D	FALSE	TRUE	FALSE	FALSE	none	ReMap	none	none	-	-
AHR	DNAH14	0	E	FALSE	FALSE	TRUE	FALSE	none	none	hocomoco_v11	none	-	-
AHR	DNAH5	0	D	FALSE	TRUE	FALSE	FALSE	none	ReMap	none	none	-	-
AHR	DNAH9	0	D	FALSE	TRUE	FALSE	FALSE	none	ReMap	none	none	-	-
AHR	DNAJB9	0	E	FALSE	FALSE	TRUE	FALSE	none	none	hocomoco_v11	none	-	-
AHR	DNLZ	0	E	FALSE	FALSE	TRUE	FALSE	none	none	hocomoco_v11	none	-	-
AHR	DNM2	0	E	FALSE	FALSE	TRUE	FALSE	none	none	hocomoco_v11	none	-	-
AHR	DOCK1	0	D	FALSE	TRUE	FALSE	FALSE	none	ReMap	none	none	-	-
AHR	DOCK2	0	D	FALSE	TRUE	FALSE	FALSE	none	ReMap	none	none	-	-
AHR	DOCK4	0	D	FALSE	TRUE	FALSE	FALSE	none	ReMap	none	none	-	-
AHR	DOK5	0	D	FALSE	TRUE	FALSE	FALSE	none	ReMap	none	none	-	-
AHR	DPF3	0	D	FALSE	TRUE	FALSE	FALSE	none	ReMap	none	none	-	-
AHR	DPP10	0	D	FALSE	TRUE	FALSE	FALSE	none	ReMap	none	none	-	-
AHR	DPP6	0	D	FALSE	TRUE	FALSE	FALSE	none	ReMap	none	none	-	-
AHR	DPYD	0	E	FALSE	FALSE	FALSE	TRUE	none	none	none	ARACNe-TCGA	-	-
AHR	DSCAM	0	D	FALSE	TRUE	FALSE	FALSE	none	ReMap	none	none	-	-
AHR	DSE	0	E	FALSE	FALSE	TRUE	FALSE	none	none	hocomoco_v11	none	-	-
AHR	DSG4	0	E	FALSE	FALSE	TRUE	FALSE	none	none	hocomoco_v11	none	-	-
AHR	DST	0	D	FALSE	TRUE	FALSE	FALSE	none	ReMap	none	none	-	-
AHR	DTNA	0	D	FALSE	TRUE	FALSE	FALSE	none	ReMap	none	none	-	-
AHR	DTNB	0	D	FALSE	TRUE	FALSE	FALSE	none	ReMap	none	none	-	-
AHR	DUSP4	0	E	FALSE	FALSE	TRUE	FALSE	none	none	hocomoco_v11	none	-	-
AHR	DYNC1I1	0	D	FALSE	TRUE	FALSE	FALSE	none	ReMap	none	none	-	-
AHR	DYNC2H1	0	E	FALSE	FALSE	TRUE	FALSE	none	none	hocomoco_v11	none	-	-
AHR	DYSF	0	D	FALSE	TRUE	FALSE	FALSE	none	ReMap	none	none	-	-
AHR	EBF1	0	D	FALSE	TRUE	FALSE	FALSE	none	ReMap	none	none	-	-
AHR	ECHDC1	0	E	FALSE	FALSE	TRUE	FALSE	none	none	hocomoco_v11	none	-	-
AHR	EEF1AKMT1	0	E	FALSE	FALSE	TRUE	FALSE	none	none	hocomoco_v11	none	-	-
AHR	EFNA1	0	E	FALSE	FALSE	TRUE	FALSE	none	none	hocomoco_v11	none	-	-
AHR	EFNA5	0	D	FALSE	TRUE	FALSE	FALSE	none	ReMap	none	none	-	-
AHR	EFR3A	0	E	FALSE	FALSE	TRUE	FALSE	none	none	hocomoco_v11	none	-	-
AHR	EGLN2	0	E	FALSE	FALSE	TRUE	FALSE	none	none	hocomoco_v11	none	-	-
AHR	EGLN3	0	D	FALSE	TRUE	FALSE	FALSE	none	ReMap	none	none	-	-
AHR	EIF4ENIF1	0	E	FALSE	FALSE	TRUE	FALSE	none	none	hocomoco_v11	none	-	-
AHR	EIF4G2	0	E	FALSE	FALSE	TRUE	FALSE	none	none	hocomoco_v11	none	-	-
AHR	ELP4	0	E	FALSE	FALSE	TRUE	FALSE	none	none	hocomoco_v11	none	-	-
AHR	EPB41L2	0	D	FALSE	TRUE	FALSE	FALSE	none	ReMap	none	none	-	-
AHR	EPHA6	0	D	FALSE	TRUE	FALSE	FALSE	none	ReMap	none	none	-	-
AHR	EPHB1	0	D	FALSE	TRUE	FALSE	FALSE	none	ReMap	none	none	-	-
AHR	ERBB4	0	D	FALSE	TRUE	FALSE	FALSE	none	ReMap	none	none	-	-
AHR	ERC2	0	D	FALSE	TRUE	FALSE	FALSE	none	ReMap	none	none	-	-
AHR	ERG	0	C	FALSE	TRUE	TRUE	FALSE	none	ReMap	hocomoco_v11	none	-	-
AHR	ERLIN2	0	E	FALSE	FALSE	TRUE	FALSE	none	none	hocomoco_v11	none	-	-
AHR	ESPL1	0	E	FALSE	FALSE	TRUE	FALSE	none	none	hocomoco_v11	none	-	-
AHR	ESR1	0	D	FALSE	TRUE	FALSE	FALSE	none	ReMap	none	none	-	-
AHR	ESRP1	0	E	FALSE	FALSE	TRUE	FALSE	none	none	hocomoco_v11	none	-	-
AHR	ESRRB	0	D	FALSE	TRUE	FALSE	FALSE	none	ReMap	none	none	-	-
AHR	ESRRG	0	D	FALSE	TRUE	FALSE	FALSE	none	ReMap	none	none	-	-
AHR	EXOC4	0	D	FALSE	TRUE	FALSE	FALSE	none	ReMap	none	none	-	-
AHR	EXOC6B	0	D	FALSE	TRUE	FALSE	FALSE	none	ReMap	none	none	-	-
AHR	EXT1	0	D	FALSE	TRUE	FALSE	FALSE	none	ReMap	none	none	-	-
AHR	EYA2	0	D	FALSE	TRUE	FALSE	FALSE	none	ReMap	none	none	-	-
AHR	FAM124A	0	E	FALSE	FALSE	TRUE	FALSE	none	none	hocomoco_v11	none	-	-
AHR	FAM135B	0	D	FALSE	TRUE	FALSE	FALSE	none	ReMap	none	none	-	-
AHR	FAM178B	0	E	FALSE	FALSE	TRUE	FALSE	none	none	hocomoco_v11	none	-	-
AHR	FAM185A	0	E	FALSE	FALSE	TRUE	FALSE	none	none	hocomoco_v11	none	-	-
AHR	FAM216A	0	E	FALSE	FALSE	TRUE	FALSE	none	none	hocomoco_v11	none	-	-
AHR	FAM46A	0	E	FALSE	FALSE	TRUE	FALSE	none	none	hocomoco_v11	none	-	-
AHR	FAM83G	0	E	FALSE	FALSE	TRUE	FALSE	none	none	hocomoco_v11	none	-	-
AHR	FBXO18	0	E	FALSE	FALSE	TRUE	FALSE	none	none	hocomoco_v11	none	-	-
AHR	FBXW11	0	D	FALSE	TRUE	FALSE	FALSE	none	ReMap	none	none	-	-
AHR	FCHSD2	0	D	FALSE	TRUE	FALSE	FALSE	none	ReMap	none	none	-	-
AHR	FDXACB1	0	E	FALSE	FALSE	TRUE	FALSE	none	none	hocomoco_v11	none	-	-
AHR	FECH	0	E	FALSE	FALSE	TRUE	FALSE	none	none	hocomoco_v11	none	-	-
AHR	FGF12	0	D	FALSE	TRUE	FALSE	FALSE	none	ReMap	none	none	-	-
AHR	FGF13	0	D	FALSE	TRUE	FALSE	FALSE	none	ReMap	none	none	-	-
AHR	FGFR2	0	E	FALSE	FALSE	TRUE	FALSE	none	none	hocomoco_v11	none	-	-
AHR	FGGY	0	D	FALSE	TRUE	FALSE	FALSE	none	ReMap	none	none	-	-
AHR	FHIT	0	D	FALSE	TRUE	FALSE	FALSE	none	ReMap	none	none	-	-
AHR	FIGN	0	D	FALSE	TRUE	FALSE	FALSE	none	ReMap	none	none	-	-
AHR	FLI1	0	E	FALSE	FALSE	TRUE	FALSE	none	none	hocomoco_v11	none	-	-
AHR	FOLH1	0	E	FALSE	FALSE	TRUE	FALSE	none	none	hocomoco_v11	none	-	-
AHR	FOS	0	A	TRUE	FALSE	FALSE	FALSE	HTRIdb,trrust	none	none	none	10478842	-
AHR	FOSB	0	E	FALSE	FALSE	TRUE	FALSE	none	none	hocomoco_v11	none	-	-
AHR	FOXN3	0	D	FALSE	TRUE	FALSE	FALSE	none	ReMap	none	none	-	-
AHR	FOXP1	0	D	FALSE	TRUE	FALSE	FALSE	none	ReMap	none	none	-	-
AHR	FOXP2	0	D	FALSE	TRUE	FALSE	FALSE	none	ReMap	none	none	-	-
AHR	FRMD3	0	D	FALSE	TRUE	FALSE	FALSE	none	ReMap	none	none	-	-
AHR	FRMD4A	0	D	FALSE	TRUE	FALSE	FALSE	none	ReMap	none	none	-	-
AHR	FRY	0	D	FALSE	TRUE	FALSE	FALSE	none	ReMap	none	none	-	-
AHR	FSTL4	0	D	FALSE	TRUE	FALSE	FALSE	none	ReMap	none	none	-	-
AHR	FUT5	0	E	FALSE	FALSE	TRUE	FALSE	none	none	hocomoco_v11	none	-	-
AHR	FUT8	0	D	FALSE	TRUE	FALSE	FALSE	none	ReMap	none	none	-	-
AHR	FXYD6	0	E	FALSE	FALSE	TRUE	FALSE	none	none	hocomoco_v11	none	-	-
AHR	FYCO1	0	E	FALSE	FALSE	TRUE	FALSE	none	none	hocomoco_v11	none	-	-
AHR	FYN	0	D	FALSE	TRUE	FALSE	FALSE	none	ReMap	none	none	-	-
AHR	G3BP1	0	E	FALSE	FALSE	TRUE	FALSE	none	none	hocomoco_v11	none	-	-
AHR	GABBR2	0	D	FALSE	TRUE	FALSE	FALSE	none	ReMap	none	none	-	-
AHR	GABRA2	0	E	FALSE	FALSE	TRUE	FALSE	none	none	hocomoco_v11	none	-	-
AHR	GALNT10	0	D	FALSE	TRUE	FALSE	FALSE	none	ReMap	none	none	-	-
AHR	GALNT13	0	D	FALSE	TRUE	FALSE	FALSE	none	ReMap	none	none	-	-
AHR	GALNTL6	0	D	FALSE	TRUE	FALSE	FALSE	none	ReMap	none	none	-	-
AHR	GAS2L3	0	E	FALSE	FALSE	TRUE	FALSE	none	none	hocomoco_v11	none	-	-
AHR	GAS7	0	C	FALSE	TRUE	TRUE	FALSE	none	ReMap	hocomoco_v11	none	-	-
AHR	GCM1	0	E	FALSE	FALSE	TRUE	FALSE	none	none	hocomoco_v11	none	-	-
AHR	GEMIN4	0	E	FALSE	FALSE	TRUE	FALSE	none	none	hocomoco_v11	none	-	-
AHR	GLDC	0	E	FALSE	FALSE	TRUE	FALSE	none	none	hocomoco_v11	none	-	-
AHR	GLI3	0	D	FALSE	TRUE	FALSE	FALSE	none	ReMap	none	none	-	-
AHR	GMDS	0	D	FALSE	TRUE	FALSE	FALSE	none	ReMap	none	none	-	-
AHR	GNAQ	0	E	FALSE	FALSE	TRUE	FALSE	none	none	hocomoco_v11	none	-	-
AHR	GNAS	0	E	FALSE	FALSE	TRUE	FALSE	none	none	hocomoco_v11	none	-	-
AHR	GOLGA2	0	E	FALSE	FALSE	TRUE	FALSE	none	none	hocomoco_v11	none	-	-
AHR	GOLGA4	0	E	FALSE	FALSE	TRUE	FALSE	none	none	hocomoco_v11	none	-	-
AHR	GON4L	0	E	FALSE	FALSE	TRUE	FALSE	none	none	hocomoco_v11	none	-	-
AHR	GPALPP1	0	E	FALSE	FALSE	TRUE	FALSE	none	none	hocomoco_v11	none	-	-
AHR	GPAT2	0	E	FALSE	FALSE	TRUE	FALSE	none	none	hocomoco_v11	none	-	-
AHR	GPATCH2	0	D	FALSE	TRUE	FALSE	FALSE	none	ReMap	none	none	-	-
AHR	GPN3	0	E	FALSE	FALSE	TRUE	FALSE	none	none	hocomoco_v11	none	-	-
AHR	GPR85	0	E	FALSE	FALSE	TRUE	FALSE	none	none	hocomoco_v11	none	-	-
AHR	GPRC5C	0	E	FALSE	FALSE	TRUE	FALSE	none	none	hocomoco_v11	none	-	-
AHR	GRB10	0	D	FALSE	TRUE	FALSE	FALSE	none	ReMap	none	none	-	-
AHR	GRIA2	0	E	FALSE	FALSE	TRUE	FALSE	none	none	hocomoco_v11	none	-	-
AHR	GRIA3	0	D	FALSE	TRUE	FALSE	FALSE	none	ReMap	none	none	-	-
AHR	GRIK2	0	D	FALSE	TRUE	FALSE	FALSE	none	ReMap	none	none	-	-
AHR	GRIK3	0	D	FALSE	TRUE	FALSE	FALSE	none	ReMap	none	none	-	-
AHR	GRIN2A	0	D	FALSE	TRUE	FALSE	FALSE	none	ReMap	none	none	-	-
AHR	GRIP1	0	D	FALSE	TRUE	FALSE	FALSE	none	ReMap	none	none	-	-
AHR	GRM7	0	D	FALSE	TRUE	FALSE	FALSE	none	ReMap	none	none	-	-
AHR	GSE1	0	D	FALSE	TRUE	FALSE	FALSE	none	ReMap	none	none	-	-
AHR	GSTCD	0	E	FALSE	FALSE	TRUE	FALSE	none	none	hocomoco_v11	none	-	-
AHR	GTDC1	0	D	FALSE	TRUE	FALSE	FALSE	none	ReMap	none	none	-	-
AHR	GTF2E2	0	E	FALSE	FALSE	TRUE	FALSE	none	none	hocomoco_v11	none	-	-
AHR	GTF3A	0	E	FALSE	FALSE	TRUE	FALSE	none	none	hocomoco_v11	none	-	-
AHR	HDAC9	0	D	FALSE	TRUE	FALSE	FALSE	none	ReMap	none	none	-	-
AHR	HECW2	0	D	FALSE	TRUE	FALSE	FALSE	none	ReMap	none	none	-	-
AHR	HELT	0	E	FALSE	FALSE	TRUE	FALSE	none	none	hocomoco_v11	none	-	-
AHR	HILPDA	0	E	FALSE	FALSE	TRUE	FALSE	none	none	hocomoco_v11	none	-	-
AHR	HIST1H4A	0	E	FALSE	FALSE	TRUE	FALSE	none	none	hocomoco_v11	none	-	-
AHR	HIVEP3	0	D	FALSE	TRUE	FALSE	FALSE	none	ReMap	none	none	-	-
AHR	HMCN1	0	D	FALSE	TRUE	FALSE	FALSE	none	ReMap	none	none	-	-
AHR	HMGCLL1	0	D	FALSE	TRUE	FALSE	FALSE	none	ReMap	none	none	-	-
AHR	HNRNPU	0	E	FALSE	FALSE	TRUE	FALSE	none	none	hocomoco_v11	none	-	-
AHR	HNRNPUL1	0	E	FALSE	FALSE	TRUE	FALSE	none	none	hocomoco_v11	none	-	-
AHR	HOXB7	0	E	FALSE	FALSE	TRUE	FALSE	none	none	hocomoco_v11	none	-	-
AHR	HPSE2	0	D	FALSE	TRUE	FALSE	FALSE	none	ReMap	none	none	-	-
AHR	HRASLS	0	E	FALSE	FALSE	TRUE	FALSE	none	none	hocomoco_v11	none	-	-
AHR	HRH1	0	E	FALSE	FALSE	FALSE	TRUE	none	none	none	ARACNe-TCGA	-	-
AHR	HUNK	0	E	FALSE	FALSE	TRUE	FALSE	none	none	hocomoco_v11	none	-	-
AHR	ICAM5	0	E	FALSE	FALSE	TRUE	FALSE	none	none	hocomoco_v11	none	-	-
AHR	IDH3A	0	E	FALSE	FALSE	TRUE	FALSE	none	none	hocomoco_v11	none	-	-
AHR	IFI16	0	E	FALSE	FALSE	TRUE	FALSE	none	none	hocomoco_v11	none	-	-
AHR	IFT172	0	E	FALSE	FALSE	TRUE	FALSE	none	none	hocomoco_v11	none	-	-
AHR	IFT20	0	E	FALSE	FALSE	TRUE	FALSE	none	none	hocomoco_v11	none	-	-
AHR	IGF1R	0	D	FALSE	TRUE	FALSE	FALSE	none	ReMap	none	none	-	-
AHR	IL13	0	D	TRUE	FALSE	FALSE	FALSE	trrust	none	none	none	22981205	-
AHR	IL16	0	D	FALSE	TRUE	FALSE	FALSE	none	ReMap	none	none	-	-
AHR	IL1B	0	D	TRUE	FALSE	FALSE	FALSE	trrust	none	none	none	23349129	-
AHR	IL1R1	0	D	FALSE	TRUE	FALSE	FALSE	none	ReMap	none	none	-	-
AHR	IL1RAP	0	E	FALSE	FALSE	FALSE	TRUE	none	none	none	ARACNe-TCGA	-	-
AHR	IL6	1	D	TRUE	FALSE	FALSE	FALSE	trrust	none	none	none	20511231	-
AHR	ILF3	0	E	FALSE	FALSE	TRUE	FALSE	none	none	hocomoco_v11	none	-	-
AHR	IMMP1L	0	E	FALSE	FALSE	TRUE	FALSE	none	none	hocomoco_v11	none	-	-
AHR	IMMP2L	0	D	FALSE	TRUE	FALSE	FALSE	none	ReMap	none	none	-	-
AHR	INPP4B	0	D	FALSE	TRUE	FALSE	FALSE	none	ReMap	none	none	-	-
AHR	INSC	0	D	FALSE	TRUE	FALSE	FALSE	none	ReMap	none	none	-	-
AHR	INTS12	0	E	FALSE	FALSE	TRUE	FALSE	none	none	hocomoco_v11	none	-	-
AHR	IQCJ	0	D	FALSE	TRUE	FALSE	FALSE	none	ReMap	none	none	-	-
AHR	IQSEC1	0	D	FALSE	TRUE	FALSE	FALSE	none	ReMap	none	none	-	-
AHR	ITFG2	0	E	FALSE	FALSE	TRUE	FALSE	none	none	hocomoco_v11	none	-	-
AHR	ITGA9	0	E	FALSE	FALSE	TRUE	FALSE	none	none	hocomoco_v11	none	-	-
AHR	ITGB6	0	D	FALSE	TRUE	FALSE	FALSE	none	ReMap	none	none	-	-
AHR	ITPR1	0	D	FALSE	TRUE	FALSE	FALSE	none	ReMap	none	none	-	-
AHR	IZUMO1	0	E	FALSE	FALSE	TRUE	FALSE	none	none	hocomoco_v11	none	-	-
AHR	JAM2	0	E	FALSE	FALSE	TRUE	FALSE	none	none	hocomoco_v11	none	-	-
AHR	JAZF1	0	D	FALSE	TRUE	FALSE	FALSE	none	ReMap	none	none	-	-
AHR	KALRN	0	D	FALSE	TRUE	FALSE	FALSE	none	ReMap	none	none	-	-
AHR	KANK4	0	E	FALSE	FALSE	TRUE	FALSE	none	none	hocomoco_v11	none	-	-
AHR	KAZN	0	D	FALSE	TRUE	FALSE	FALSE	none	ReMap	none	none	-	-
AHR	KCNB1	0	D	FALSE	TRUE	FALSE	FALSE	none	ReMap	none	none	-	-
AHR	KCNG1	0	E	FALSE	FALSE	TRUE	FALSE	none	none	hocomoco_v11	none	-	-
AHR	KCNK2	0	D	FALSE	TRUE	FALSE	FALSE	none	ReMap	none	none	-	-
AHR	KCNMA1	0	D	FALSE	TRUE	FALSE	FALSE	none	ReMap	none	none	-	-
AHR	KCNMB2	0	D	FALSE	TRUE	FALSE	FALSE	none	ReMap	none	none	-	-
AHR	KCNQ3	0	D	FALSE	TRUE	FALSE	FALSE	none	ReMap	none	none	-	-
AHR	KCTD16	0	E	FALSE	FALSE	TRUE	FALSE	none	none	hocomoco_v11	none	-	-
AHR	KDM4C	0	C	FALSE	TRUE	TRUE	FALSE	none	ReMap	hocomoco_v11	none	-	-
AHR	KEAP1	0	E	FALSE	FALSE	TRUE	FALSE	none	none	hocomoco_v11	none	-	-
AHR	KHNYN	0	E	FALSE	FALSE	TRUE	FALSE	none	none	hocomoco_v11	none	-	-
AHR	KIAA0319	0	E	FALSE	FALSE	TRUE	FALSE	none	none	hocomoco_v11	none	-	-
AHR	KIAA1217	0	D	FALSE	TRUE	FALSE	FALSE	none	ReMap	none	none	-	-
AHR	KIF13B	0	E	FALSE	FALSE	TRUE	FALSE	none	none	hocomoco_v11	none	-	-
AHR	KLF13	0	E	FALSE	FALSE	TRUE	FALSE	none	none	hocomoco_v11	none	-	-
AHR	KLHL2	0	E	FALSE	FALSE	TRUE	FALSE	none	none	hocomoco_v11	none	-	-
AHR	KRBA1	0	E	FALSE	FALSE	TRUE	FALSE	none	none	hocomoco_v11	none	-	-
AHR	KSR2	0	D	FALSE	TRUE	FALSE	FALSE	none	ReMap	none	none	-	-
AHR	L1CAM	0	E	FALSE	FALSE	TRUE	FALSE	none	none	hocomoco_v11	none	-	-
AHR	LARGE1	0	D	FALSE	TRUE	FALSE	FALSE	none	ReMap	none	none	-	-
AHR	LDB2	0	D	FALSE	TRUE	FALSE	FALSE	none	ReMap	none	none	-	-
AHR	LGALS4	0	E	FALSE	FALSE	TRUE	FALSE	none	none	hocomoco_v11	none	-	-
AHR	LHFPL2	0	D	FALSE	TRUE	FALSE	FALSE	none	ReMap	none	none	-	-
AHR	LHX9	0	E	FALSE	FALSE	TRUE	FALSE	none	none	hocomoco_v11	none	-	-
AHR	LIMS2	0	E	FALSE	FALSE	TRUE	FALSE	none	none	hocomoco_v11	none	-	-
AHR	LINC00494	0	D	FALSE	TRUE	FALSE	FALSE	none	ReMap	none	none	-	-
AHR	LINC00511	0	D	FALSE	TRUE	FALSE	FALSE	none	ReMap	none	none	-	-
AHR	LINC00535	0	D	FALSE	TRUE	FALSE	FALSE	none	ReMap	none	none	-	-
AHR	LINC00540	0	D	FALSE	TRUE	FALSE	FALSE	none	ReMap	none	none	-	-
AHR	LINC00598	0	D	FALSE	TRUE	FALSE	FALSE	none	ReMap	none	none	-	-
AHR	LINC00698	0	D	FALSE	TRUE	FALSE	FALSE	none	ReMap	none	none	-	-
AHR	LINC00709	0	D	FALSE	TRUE	FALSE	FALSE	none	ReMap	none	none	-	-
AHR	LINC00824	0	D	FALSE	TRUE	FALSE	FALSE	none	ReMap	none	none	-	-
AHR	LINC00871	0	D	FALSE	TRUE	FALSE	FALSE	none	ReMap	none	none	-	-
AHR	LINC01122	0	D	FALSE	TRUE	FALSE	FALSE	none	ReMap	none	none	-	-
AHR	LINC01322	0	D	FALSE	TRUE	FALSE	FALSE	none	ReMap	none	none	-	-
AHR	LINC01376	0	D	FALSE	TRUE	FALSE	FALSE	none	ReMap	none	none	-	-
AHR	LINC01470	0	D	FALSE	TRUE	FALSE	FALSE	none	ReMap	none	none	-	-
AHR	LINC01505	0	D	FALSE	TRUE	FALSE	FALSE	none	ReMap	none	none	-	-
AHR	LINC01933	0	D	FALSE	TRUE	FALSE	FALSE	none	ReMap	none	none	-	-
AHR	LINC02147	0	D	FALSE	TRUE	FALSE	FALSE	none	ReMap	none	none	-	-
AHR	LIPA	0	E	FALSE	FALSE	TRUE	FALSE	none	none	hocomoco_v11	none	-	-
AHR	LMCD1	0	D	FALSE	TRUE	FALSE	FALSE	none	ReMap	none	none	-	-
AHR	LPP	0	D	FALSE	TRUE	FALSE	FALSE	none	ReMap	none	none	-	-
AHR	LRIG3	0	E	FALSE	FALSE	TRUE	FALSE	none	none	hocomoco_v11	none	-	-
AHR	LRP1B	0	D	FALSE	TRUE	FALSE	FALSE	none	ReMap	none	none	-	-
AHR	LRP2	0	D	FALSE	TRUE	FALSE	FALSE	none	ReMap	none	none	-	-
AHR	LSAMP	0	D	FALSE	TRUE	FALSE	FALSE	none	ReMap	none	none	-	-
AHR	LTBP1	0	D	FALSE	TRUE	FALSE	FALSE	none	ReMap	none	none	-	-
AHR	LY96	0	E	FALSE	FALSE	TRUE	FALSE	none	none	hocomoco_v11	none	-	-
AHR	LYPLAL1	0	E	FALSE	FALSE	TRUE	FALSE	none	none	hocomoco_v11	none	-	-
AHR	MACROD2	0	D	FALSE	TRUE	FALSE	FALSE	none	ReMap	none	none	-	-
AHR	MAD1L1	0	D	FALSE	TRUE	FALSE	FALSE	none	ReMap	none	none	-	-
AHR	MADD	0	E	FALSE	FALSE	TRUE	FALSE	none	none	hocomoco_v11	none	-	-
AHR	MAF	0	E	FALSE	FALSE	TRUE	FALSE	none	none	hocomoco_v11	none	-	-
AHR	MAGI1	0	D	FALSE	TRUE	FALSE	FALSE	none	ReMap	none	none	-	-
AHR	MAGI2	0	D	FALSE	TRUE	FALSE	FALSE	none	ReMap	none	none	-	-
AHR	MALRD1	0	D	FALSE	TRUE	FALSE	FALSE	none	ReMap	none	none	-	-
AHR	MAP1S	0	E	FALSE	FALSE	TRUE	FALSE	none	none	hocomoco_v11	none	-	-
AHR	MAP2	0	D	FALSE	TRUE	FALSE	FALSE	none	ReMap	none	none	-	-
AHR	MAP4K4	0	D	FALSE	TRUE	FALSE	FALSE	none	ReMap	none	none	-	-
AHR	MAPK10	0	D	FALSE	TRUE	FALSE	FALSE	none	ReMap	none	none	-	-
AHR	MAST4	0	D	FALSE	TRUE	FALSE	FALSE	none	ReMap	none	none	-	-
AHR	MBD1	0	E	FALSE	FALSE	TRUE	FALSE	none	none	hocomoco_v11	none	-	-
AHR	MBD5	0	D	FALSE	TRUE	FALSE	FALSE	none	ReMap	none	none	-	-
AHR	MBNL3	0	D	FALSE	TRUE	FALSE	FALSE	none	ReMap	none	none	-	-
AHR	MCC	0	D	FALSE	TRUE	FALSE	FALSE	none	ReMap	none	none	-	-
AHR	MCTP2	0	D	FALSE	TRUE	FALSE	FALSE	none	ReMap	none	none	-	-
AHR	MDGA2	0	D	FALSE	TRUE	FALSE	FALSE	none	ReMap	none	none	-	-
AHR	MECOM	0	D	FALSE	TRUE	FALSE	FALSE	none	ReMap	none	none	-	-
AHR	MED12	0	E	FALSE	FALSE	TRUE	FALSE	none	none	hocomoco_v11	none	-	-
AHR	MEF2C	0	D	FALSE	TRUE	FALSE	FALSE	none	ReMap	none	none	-	-
AHR	MEIOC	0	E	FALSE	FALSE	TRUE	FALSE	none	none	hocomoco_v11	none	-	-
AHR	METTL5	0	E	FALSE	FALSE	TRUE	FALSE	none	none	hocomoco_v11	none	-	-
AHR	MFSD2A	0	D	TRUE	FALSE	FALSE	FALSE	trrust	none	none	none	21736709	-
AHR	MGAT4C	0	D	FALSE	TRUE	FALSE	FALSE	none	ReMap	none	none	-	-
AHR	MIB2	0	E	FALSE	FALSE	TRUE	FALSE	none	none	hocomoco_v11	none	-	-
AHR	MID1	0	D	FALSE	TRUE	FALSE	FALSE	none	ReMap	none	none	-	-
AHR	MIR3616	0	D	FALSE	TRUE	FALSE	FALSE	none	ReMap	none	none	-	-
AHR	MIR3681HG	0	D	FALSE	TRUE	FALSE	FALSE	none	ReMap	none	none	-	-
AHR	MIR4300HG	0	D	FALSE	TRUE	FALSE	FALSE	none	ReMap	none	none	-	-
AHR	MLH3	0	E	FALSE	FALSE	TRUE	FALSE	none	none	hocomoco_v11	none	-	-
AHR	MLLT3	0	E	FALSE	FALSE	TRUE	FALSE	none	none	hocomoco_v11	none	-	-
AHR	MME	0	D	FALSE	TRUE	FALSE	FALSE	none	ReMap	none	none	-	-
AHR	MPC1	0	E	FALSE	FALSE	TRUE	FALSE	none	none	hocomoco_v11	none	-	-
AHR	MPLKIP	0	E	FALSE	FALSE	TRUE	FALSE	none	none	hocomoco_v11	none	-	-
AHR	MRPL4	0	E	FALSE	FALSE	TRUE	FALSE	none	none	hocomoco_v11	none	-	-
AHR	MRPS18A	0	E	FALSE	FALSE	TRUE	FALSE	none	none	hocomoco_v11	none	-	-
AHR	MRPS18B	0	E	FALSE	FALSE	TRUE	FALSE	none	none	hocomoco_v11	none	-	-
AHR	MSI2	0	D	FALSE	TRUE	FALSE	FALSE	none	ReMap	none	none	-	-
AHR	MT2A	0	D	TRUE	FALSE	FALSE	FALSE	trrust	none	none	none	23994556	-
AHR	MTSS1	0	D	FALSE	TRUE	FALSE	FALSE	none	ReMap	none	none	-	-
AHR	MTUS2	0	D	FALSE	TRUE	FALSE	FALSE	none	ReMap	none	none	-	-
AHR	MVB12B	0	D	FALSE	TRUE	FALSE	FALSE	none	ReMap	none	none	-	-
AHR	MVP	0	E	FALSE	FALSE	TRUE	FALSE	none	none	hocomoco_v11	none	-	-
AHR	MYC	0	A	TRUE	FALSE	FALSE	FALSE	fantom4,trrust	none	none	none	11114727,16091746	-
AHR	MYLK	0	D	FALSE	TRUE	FALSE	FALSE	none	ReMap	none	none	-	-
AHR	MYO16	0	D	FALSE	TRUE	FALSE	FALSE	none	ReMap	none	none	-	-
AHR	MYO1B	0	D	FALSE	TRUE	FALSE	FALSE	none	ReMap	none	none	-	-
AHR	MYO5A	0	D	FALSE	TRUE	FALSE	FALSE	none	ReMap	none	none	-	-
AHR	MYT1L	0	D	FALSE	TRUE	FALSE	FALSE	none	ReMap	none	none	-	-
AHR	N4BP1	0	E	FALSE	FALSE	TRUE	FALSE	none	none	hocomoco_v11	none	-	-
AHR	NAALADL2	0	D	FALSE	TRUE	FALSE	FALSE	none	ReMap	none	none	-	-
AHR	NACA2	0	D	FALSE	TRUE	FALSE	FALSE	none	ReMap	none	none	-	-
AHR	NAV2	0	D	FALSE	TRUE	FALSE	FALSE	none	ReMap	none	none	-	-
AHR	NAV3	0	D	FALSE	TRUE	FALSE	FALSE	none	ReMap	none	none	-	-
AHR	NBAS	0	D	FALSE	TRUE	FALSE	FALSE	none	ReMap	none	none	-	-
AHR	NCALD	0	D	FALSE	TRUE	FALSE	FALSE	none	ReMap	none	none	-	-
AHR	NCAM2	0	D	FALSE	TRUE	FALSE	FALSE	none	ReMap	none	none	-	-
AHR	NCK2	0	E	FALSE	FALSE	TRUE	FALSE	none	none	hocomoco_v11	none	-	-
AHR	NCOA3	0	D	FALSE	TRUE	FALSE	FALSE	none	ReMap	none	none	-	-
AHR	NCOR2	0	C	FALSE	TRUE	TRUE	FALSE	none	ReMap	hocomoco_v11	none	-	-
AHR	NDUFB10	0	E	FALSE	FALSE	TRUE	FALSE	none	none	hocomoco_v11	none	-	-
AHR	NEDD4L	0	D	FALSE	TRUE	FALSE	FALSE	none	ReMap	none	none	-	-
AHR	NEDD9	0	D	FALSE	TRUE	FALSE	FALSE	none	ReMap	none	none	-	-
AHR	NEK8	0	E	FALSE	FALSE	TRUE	FALSE	none	none	hocomoco_v11	none	-	-
AHR	NELL2	0	D	FALSE	TRUE	FALSE	FALSE	none	ReMap	none	none	-	-
AHR	NEO1	0	D	FALSE	TRUE	FALSE	FALSE	none	ReMap	none	none	-	-
AHR	NEURL2	0	E	FALSE	FALSE	TRUE	FALSE	none	none	hocomoco_v11	none	-	-
AHR	NEUROG2	0	E	FALSE	FALSE	TRUE	FALSE	none	none	hocomoco_v11	none	-	-
AHR	NFASC	0	D	FALSE	TRUE	FALSE	FALSE	none	ReMap	none	none	-	-
AHR	NFATC2	0	D	FALSE	TRUE	FALSE	FALSE	none	ReMap	none	none	-	-
AHR	NFIB	0	D	FALSE	TRUE	FALSE	FALSE	none	ReMap	none	none	-	-
AHR	NFKBIB	0	E	FALSE	FALSE	TRUE	FALSE	none	none	hocomoco_v11	none	-	-
AHR	NID1	0	E	FALSE	FALSE	TRUE	FALSE	none	none	hocomoco_v11	none	-	-
AHR	NKAIN2	0	D	FALSE	TRUE	FALSE	FALSE	none	ReMap	none	none	-	-
AHR	NKAP	0	E	FALSE	FALSE	TRUE	FALSE	none	none	hocomoco_v11	none	-	-
AHR	NKTR	0	E	FALSE	FALSE	TRUE	FALSE	none	none	hocomoco_v11	none	-	-
AHR	NLGN1	0	D	FALSE	TRUE	FALSE	FALSE	none	ReMap	none	none	-	-
AHR	NLGN3	0	E	FALSE	FALSE	TRUE	FALSE	none	none	hocomoco_v11	none	-	-
AHR	NLRC3	0	E	FALSE	FALSE	TRUE	FALSE	none	none	hocomoco_v11	none	-	-
AHR	NME1	0	E	FALSE	FALSE	TRUE	FALSE	none	none	hocomoco_v11	none	-	-
AHR	NME1-NME2	0	E	FALSE	FALSE	TRUE	FALSE	none	none	hocomoco_v11	none	-	-
AHR	NMNAT3	0	E	FALSE	FALSE	TRUE	FALSE	none	none	hocomoco_v11	none	-	-
AHR	NOC2L	0	E	FALSE	FALSE	TRUE	FALSE	none	none	hocomoco_v11	none	-	-
AHR	NOM1	0	E	FALSE	FALSE	TRUE	FALSE	none	none	hocomoco_v11	none	-	-
AHR	NPAS2	0	E	FALSE	FALSE	TRUE	FALSE	none	none	hocomoco_v11	none	-	-
AHR	NPAS3	0	D	FALSE	TRUE	FALSE	FALSE	none	ReMap	none	none	-	-
AHR	NPAT	0	E	FALSE	FALSE	TRUE	FALSE	none	none	hocomoco_v11	none	-	-
AHR	NPIPA1	0	E	FALSE	FALSE	TRUE	FALSE	none	none	hocomoco_v11	none	-	-
AHR	NPIPA5	0	E	FALSE	FALSE	TRUE	FALSE	none	none	hocomoco_v11	none	-	-
AHR	NPTX2	0	E	FALSE	FALSE	TRUE	FALSE	none	none	hocomoco_v11	none	-	-
AHR	NR1H3	0	E	FALSE	FALSE	TRUE	FALSE	none	none	hocomoco_v11	none	-	-
AHR	NR3C1	0	E	FALSE	FALSE	TRUE	FALSE	none	none	hocomoco_v11	none	-	-
AHR	NRCAM	0	D	FALSE	TRUE	FALSE	FALSE	none	ReMap	none	none	-	-
AHR	NRF1	0	E	FALSE	FALSE	TRUE	FALSE	none	none	hocomoco_v11	none	-	-
AHR	NRG1	0	E	FALSE	FALSE	TRUE	FALSE	none	none	hocomoco_v11	none	-	-
AHR	NRG3	0	D	FALSE	TRUE	FALSE	FALSE	none	ReMap	none	none	-	-
AHR	NRP2	0	D	FALSE	TRUE	FALSE	FALSE	none	ReMap	none	none	-	-
AHR	NRXN1	0	D	FALSE	TRUE	FALSE	FALSE	none	ReMap	none	none	-	-
AHR	NRXN3	0	D	FALSE	TRUE	FALSE	FALSE	none	ReMap	none	none	-	-
AHR	NSMCE2	0	E	FALSE	FALSE	TRUE	FALSE	none	none	hocomoco_v11	none	-	-
AHR	NTNG1	0	D	FALSE	TRUE	FALSE	FALSE	none	ReMap	none	none	-	-
AHR	NTRK3	0	D	FALSE	TRUE	FALSE	FALSE	none	ReMap	none	none	-	-
AHR	NUBPL	0	D	FALSE	TRUE	FALSE	FALSE	none	ReMap	none	none	-	-
AHR	NUFIP1	0	E	FALSE	FALSE	TRUE	FALSE	none	none	hocomoco_v11	none	-	-
AHR	NUMA1	0	E	FALSE	FALSE	TRUE	FALSE	none	none	hocomoco_v11	none	-	-
AHR	NXPH1	0	D	FALSE	TRUE	FALSE	FALSE	none	ReMap	none	none	-	-
AHR	OFCC1	0	D	FALSE	TRUE	FALSE	FALSE	none	ReMap	none	none	-	-
AHR	OGT	0	E	FALSE	FALSE	TRUE	FALSE	none	none	hocomoco_v11	none	-	-
AHR	OPLAH	0	E	FALSE	FALSE	TRUE	FALSE	none	none	hocomoco_v11	none	-	-
AHR	OR51S1	0	E	FALSE	FALSE	TRUE	FALSE	none	none	hocomoco_v11	none	-	-
AHR	OR8K5	0	E	FALSE	FALSE	TRUE	FALSE	none	none	hocomoco_v11	none	-	-
AHR	OSBPL10	0	D	FALSE	TRUE	FALSE	FALSE	none	ReMap	none	none	-	-
AHR	OXR1	0	D	FALSE	TRUE	FALSE	FALSE	none	ReMap	none	none	-	-
AHR	P2RY6	0	E	FALSE	FALSE	TRUE	FALSE	none	none	hocomoco_v11	none	-	-
AHR	P3H2	0	D	FALSE	TRUE	FALSE	FALSE	none	ReMap	none	none	-	-
AHR	PAGR1	0	E	FALSE	FALSE	TRUE	FALSE	none	none	hocomoco_v11	none	-	-
AHR	PAM	0	D	FALSE	TRUE	FALSE	FALSE	none	ReMap	none	none	-	-
AHR	PAMR1	0	E	FALSE	FALSE	TRUE	FALSE	none	none	hocomoco_v11	none	-	-
AHR	PAPD7	0	E	FALSE	FALSE	TRUE	FALSE	none	none	hocomoco_v11	none	-	-
AHR	PAPPA2	0	D	FALSE	TRUE	FALSE	FALSE	none	ReMap	none	none	-	-
AHR	PARD3B	0	D	FALSE	TRUE	FALSE	FALSE	none	ReMap	none	none	-	-
AHR	PBX1	0	D	FALSE	TRUE	FALSE	FALSE	none	ReMap	none	none	-	-
AHR	PCLO	0	D	FALSE	TRUE	FALSE	FALSE	none	ReMap	none	none	-	-
AHR	PCNA	1	D	TRUE	FALSE	FALSE	FALSE	trrust	none	none	none	12417031	-
AHR	PCNX2	0	D	FALSE	TRUE	FALSE	FALSE	none	ReMap	none	none	-	-
AHR	PCSK4	0	E	FALSE	FALSE	TRUE	FALSE	none	none	hocomoco_v11	none	-	-
AHR	PCSK5	0	D	FALSE	TRUE	FALSE	FALSE	none	ReMap	none	none	-	-
AHR	PDE10A	0	E	FALSE	FALSE	TRUE	FALSE	none	none	hocomoco_v11	none	-	-
AHR	PDE1A	0	D	FALSE	TRUE	FALSE	FALSE	none	ReMap	none	none	-	-
AHR	PDE1C	0	D	FALSE	TRUE	FALSE	FALSE	none	ReMap	none	none	-	-
AHR	PDE4A	0	E	FALSE	FALSE	TRUE	FALSE	none	none	hocomoco_v11	none	-	-
AHR	PDE4D	0	D	FALSE	TRUE	FALSE	FALSE	none	ReMap	none	none	-	-
AHR	PDE8A	0	D	FALSE	TRUE	FALSE	FALSE	none	ReMap	none	none	-	-
AHR	PDE8B	0	D	FALSE	TRUE	FALSE	FALSE	none	ReMap	none	none	-	-
AHR	PDS5B	0	E	FALSE	FALSE	TRUE	FALSE	none	none	hocomoco_v11	none	-	-
AHR	PDYN	0	E	FALSE	FALSE	TRUE	FALSE	none	none	hocomoco_v11	none	-	-
AHR	PET117	0	E	FALSE	FALSE	TRUE	FALSE	none	none	hocomoco_v11	none	-	-
AHR	PEX7	0	E	FALSE	FALSE	TRUE	FALSE	none	none	hocomoco_v11	none	-	-
AHR	PFDN4	0	D	FALSE	TRUE	FALSE	FALSE	none	ReMap	none	none	-	-
AHR	PHACTR1	0	D	FALSE	TRUE	FALSE	FALSE	none	ReMap	none	none	-	-
AHR	PHACTR2	0	D	FALSE	TRUE	FALSE	FALSE	none	ReMap	none	none	-	-
AHR	PHACTR3	0	C	FALSE	TRUE	TRUE	FALSE	none	ReMap	hocomoco_v11	none	-	-
AHR	PHF10	0	E	FALSE	FALSE	TRUE	FALSE	none	none	hocomoco_v11	none	-	-
AHR	PHLDB2	0	D	FALSE	TRUE	FALSE	FALSE	none	ReMap	none	none	-	-
AHR	PIGX	0	E	FALSE	FALSE	TRUE	FALSE	none	none	hocomoco_v11	none	-	-
AHR	PIP4K2A	0	D	FALSE	TRUE	FALSE	FALSE	none	ReMap	none	none	-	-
AHR	PISD	0	E	FALSE	FALSE	TRUE	FALSE	none	none	hocomoco_v11	none	-	-
AHR	PKD2	0	E	FALSE	FALSE	TRUE	FALSE	none	none	hocomoco_v11	none	-	-
AHR	PLA2G6	0	E	FALSE	FALSE	TRUE	FALSE	none	none	hocomoco_v11	none	-	-
AHR	PLCB1	0	D	FALSE	TRUE	FALSE	FALSE	none	ReMap	none	none	-	-
AHR	PLCB4	0	D	FALSE	TRUE	FALSE	FALSE	none	ReMap	none	none	-	-
AHR	PLCL1	0	D	FALSE	TRUE	FALSE	FALSE	none	ReMap	none	none	-	-
AHR	PLD1	0	D	FALSE	TRUE	FALSE	FALSE	none	ReMap	none	none	-	-
AHR	PLEC	0	E	FALSE	FALSE	TRUE	FALSE	none	none	hocomoco_v11	none	-	-
AHR	PLXNA4	0	D	FALSE	TRUE	FALSE	FALSE	none	ReMap	none	none	-	-
AHR	PM20D1	0	E	FALSE	FALSE	TRUE	FALSE	none	none	hocomoco_v11	none	-	-
AHR	PMEPA1	0	D	FALSE	TRUE	FALSE	FALSE	none	ReMap	none	none	-	-
AHR	POLD4	0	E	FALSE	FALSE	TRUE	FALSE	none	none	hocomoco_v11	none	-	-
AHR	POLK	0	E	FALSE	FALSE	TRUE	FALSE	none	none	hocomoco_v11	none	-	-
AHR	POLR2L	0	E	FALSE	FALSE	TRUE	FALSE	none	none	hocomoco_v11	none	-	-
AHR	POPDC2	0	E	FALSE	FALSE	TRUE	FALSE	none	none	hocomoco_v11	none	-	-
AHR	POPDC3	0	E	FALSE	FALSE	TRUE	FALSE	none	none	hocomoco_v11	none	-	-
AHR	PPA2	0	E	FALSE	FALSE	TRUE	FALSE	none	none	hocomoco_v11	none	-	-
AHR	PPFIA2	0	D	FALSE	TRUE	FALSE	FALSE	none	ReMap	none	none	-	-
AHR	PPL	0	E	FALSE	FALSE	TRUE	FALSE	none	none	hocomoco_v11	none	-	-
AHR	PPP1R10	0	E	FALSE	FALSE	TRUE	FALSE	none	none	hocomoco_v11	none	-	-
AHR	PREX1	0	D	FALSE	TRUE	FALSE	FALSE	none	ReMap	none	none	-	-
AHR	PRICKLE2	0	D	FALSE	TRUE	FALSE	FALSE	none	ReMap	none	none	-	-
AHR	PRIM1	0	E	FALSE	FALSE	TRUE	FALSE	none	none	hocomoco_v11	none	-	-
AHR	PRKAG2	0	D	FALSE	TRUE	FALSE	FALSE	none	ReMap	none	none	-	-
AHR	PRKCB	0	D	FALSE	TRUE	FALSE	FALSE	none	ReMap	none	none	-	-
AHR	PRKCE	0	D	FALSE	TRUE	FALSE	FALSE	none	ReMap	none	none	-	-
AHR	PRKCH	0	D	FALSE	TRUE	FALSE	FALSE	none	ReMap	none	none	-	-
AHR	PRKCI	0	E	FALSE	FALSE	TRUE	FALSE	none	none	hocomoco_v11	none	-	-
AHR	PRKD1	0	D	FALSE	TRUE	FALSE	FALSE	none	ReMap	none	none	-	-
AHR	PRKG1	0	D	FALSE	TRUE	FALSE	FALSE	none	ReMap	none	none	-	-
AHR	PRLR	0	D	FALSE	TRUE	FALSE	FALSE	none	ReMap	none	none	-	-
AHR	PRMT9	0	E	FALSE	FALSE	TRUE	FALSE	none	none	hocomoco_v11	none	-	-
AHR	PRTFDC1	0	E	FALSE	FALSE	TRUE	FALSE	none	none	hocomoco_v11	none	-	-
AHR	PRUNE2	0	D	FALSE	TRUE	FALSE	FALSE	none	ReMap	none	none	-	-
AHR	PTK2	0	D	FALSE	TRUE	FALSE	FALSE	none	ReMap	none	none	-	-
AHR	PTK2B	0	E	FALSE	FALSE	TRUE	FALSE	none	none	hocomoco_v11	none	-	-
AHR	PTPRG	0	D	FALSE	TRUE	FALSE	FALSE	none	ReMap	none	none	-	-
AHR	PTPRT	0	D	FALSE	TRUE	FALSE	FALSE	none	ReMap	none	none	-	-
AHR	PUF60	0	E	FALSE	FALSE	TRUE	FALSE	none	none	hocomoco_v11	none	-	-
AHR	PVT1	0	D	FALSE	TRUE	FALSE	FALSE	none	ReMap	none	none	-	-
AHR	RAB27B	0	E	FALSE	FALSE	FALSE	TRUE	none	none	none	ARACNe-TCGA	-	-
AHR	RAB40B	0	E	FALSE	FALSE	TRUE	FALSE	none	none	hocomoco_v11	none	-	-
AHR	RABGAP1L	0	D	FALSE	TRUE	FALSE	FALSE	none	ReMap	none	none	-	-
AHR	RAD51B	0	D	FALSE	TRUE	FALSE	FALSE	none	ReMap	none	none	-	-
AHR	RALBP1	0	E	FALSE	FALSE	TRUE	FALSE	none	none	hocomoco_v11	none	-	-
AHR	RALGAPA2	0	D	FALSE	TRUE	FALSE	FALSE	none	ReMap	none	none	-	-
AHR	RAN	0	E	FALSE	FALSE	TRUE	FALSE	none	none	hocomoco_v11	none	-	-
AHR	RANBP17	0	D	FALSE	TRUE	FALSE	FALSE	none	ReMap	none	none	-	-
AHR	RAPGEF4	0	D	FALSE	TRUE	FALSE	FALSE	none	ReMap	none	none	-	-
AHR	RASA4	0	E	FALSE	FALSE	TRUE	FALSE	none	none	hocomoco_v11	none	-	-
AHR	RASSF1	0	E	FALSE	FALSE	TRUE	FALSE	none	none	hocomoco_v11	none	-	-
AHR	RBFOX1	0	D	FALSE	TRUE	FALSE	FALSE	none	ReMap	none	none	-	-
AHR	RBFOX3	0	D	FALSE	TRUE	FALSE	FALSE	none	ReMap	none	none	-	-
AHR	RBM47	0	D	FALSE	TRUE	FALSE	FALSE	none	ReMap	none	none	-	-
AHR	RBMS1	0	D	FALSE	TRUE	FALSE	FALSE	none	ReMap	none	none	-	-
AHR	RBMS3	0	D	FALSE	TRUE	FALSE	FALSE	none	ReMap	none	none	-	-
AHR	RBPJ	0	D	FALSE	TRUE	FALSE	FALSE	none	ReMap	none	none	-	-
AHR	RCBTB2	0	E	FALSE	FALSE	TRUE	FALSE	none	none	hocomoco_v11	none	-	-
AHR	REEP6	0	E	FALSE	FALSE	TRUE	FALSE	none	none	hocomoco_v11	none	-	-
AHR	RELN	0	D	FALSE	TRUE	FALSE	FALSE	none	ReMap	none	none	-	-
AHR	RETREG2	0	E	FALSE	FALSE	TRUE	FALSE	none	none	hocomoco_v11	none	-	-
AHR	RFC3	1	D	TRUE	FALSE	FALSE	FALSE	trrust	none	none	none	12417031	-
AHR	RGS22	0	D	FALSE	TRUE	FALSE	FALSE	none	ReMap	none	none	-	-
AHR	RGS6	0	D	FALSE	TRUE	FALSE	FALSE	none	ReMap	none	none	-	-
AHR	RGS9	0	D	FALSE	TRUE	FALSE	FALSE	none	ReMap	none	none	-	-
AHR	RILPL2	0	E	FALSE	FALSE	TRUE	FALSE	none	none	hocomoco_v11	none	-	-
AHR	RIMS2	0	D	FALSE	TRUE	FALSE	FALSE	none	ReMap	none	none	-	-
AHR	RIN3	0	D	FALSE	TRUE	FALSE	FALSE	none	ReMap	none	none	-	-
AHR	RNA5SP189	0	D	FALSE	TRUE	FALSE	FALSE	none	ReMap	none	none	-	-
AHR	RNF11	0	E	FALSE	FALSE	FALSE	TRUE	none	none	none	ARACNe-TCGA	-	-
AHR	RNF19A	0	E	FALSE	FALSE	FALSE	TRUE	none	none	none	ARACNe-TCGA	-	-
AHR	RNF24	0	E	FALSE	FALSE	TRUE	FALSE	none	none	hocomoco_v11	none	-	-
AHR	RNU4ATAC7P	0	D	FALSE	TRUE	FALSE	FALSE	none	ReMap	none	none	-	-
AHR	RNU7	0	D	FALSE	TRUE	FALSE	FALSE	none	ReMap	none	none	-	-
AHR	ROBO1	0	D	FALSE	TRUE	FALSE	FALSE	none	ReMap	none	none	-	-
AHR	ROBO2	0	D	FALSE	TRUE	FALSE	FALSE	none	ReMap	none	none	-	-
AHR	ROR2	0	D	FALSE	TRUE	FALSE	FALSE	none	ReMap	none	none	-	-
AHR	RP11	0	D	FALSE	TRUE	FALSE	FALSE	none	ReMap	none	none	-	-
AHR	RPH3A	0	D	FALSE	TRUE	FALSE	FALSE	none	ReMap	none	none	-	-
AHR	RPL10AP6	0	D	FALSE	TRUE	FALSE	FALSE	none	ReMap	none	none	-	-
AHR	RPL35AP19	0	D	FALSE	TRUE	FALSE	FALSE	none	ReMap	none	none	-	-
AHR	RPL5	0	E	FALSE	FALSE	TRUE	FALSE	none	none	hocomoco_v11	none	-	-
AHR	RPP21	0	E	FALSE	FALSE	TRUE	FALSE	none	none	hocomoco_v11	none	-	-
AHR	RPS6KA2	0	E	FALSE	FALSE	TRUE	FALSE	none	none	hocomoco_v11	none	-	-
AHR	RPTOR	0	D	FALSE	TRUE	FALSE	FALSE	none	ReMap	none	none	-	-
AHR	RSRC1	0	E	FALSE	FALSE	TRUE	FALSE	none	none	hocomoco_v11	none	-	-
AHR	RTN1	0	D	FALSE	TRUE	FALSE	FALSE	none	ReMap	none	none	-	-
AHR	RUNX1	0	D	FALSE	TRUE	FALSE	FALSE	none	ReMap	none	none	-	-
AHR	RYR3	0	D	FALSE	TRUE	FALSE	FALSE	none	ReMap	none	none	-	-
AHR	SAMD12	0	D	FALSE	TRUE	FALSE	FALSE	none	ReMap	none	none	-	-
AHR	SAMD4A	0	D	FALSE	TRUE	FALSE	FALSE	none	ReMap	none	none	-	-
AHR	SASH1	0	E	FALSE	FALSE	TRUE	FALSE	none	none	hocomoco_v11	none	-	-
AHR	SATB1	0	D	FALSE	TRUE	FALSE	FALSE	none	ReMap	none	none	-	-
AHR	SCAND1	0	E	FALSE	FALSE	TRUE	FALSE	none	none	hocomoco_v11	none	-	-
AHR	SCAPER	0	D	FALSE	TRUE	FALSE	FALSE	none	ReMap	none	none	-	-
AHR	SCIN	0	E	FALSE	FALSE	TRUE	FALSE	none	none	hocomoco_v11	none	-	-
AHR	SCN8A	0	D	FALSE	TRUE	FALSE	FALSE	none	ReMap	none	none	-	-
AHR	SCX	0	E	FALSE	FALSE	TRUE	FALSE	none	none	hocomoco_v11	none	-	-
AHR	SDK1	0	D	FALSE	TRUE	FALSE	FALSE	none	ReMap	none	none	-	-
AHR	SEM1	0	D	FALSE	TRUE	FALSE	FALSE	none	ReMap	none	none	-	-
AHR	SEMA4D	0	D	FALSE	TRUE	FALSE	FALSE	none	ReMap	none	none	-	-
AHR	SENP7	0	E	FALSE	FALSE	TRUE	FALSE	none	none	hocomoco_v11	none	-	-
AHR	SESN2	0	E	FALSE	FALSE	TRUE	FALSE	none	none	hocomoco_v11	none	-	-
AHR	SETD2	0	E	FALSE	FALSE	TRUE	FALSE	none	none	hocomoco_v11	none	-	-
AHR	SETMAR	0	E	FALSE	FALSE	TRUE	FALSE	none	none	hocomoco_v11	none	-	-
AHR	SFXN5	0	E	FALSE	FALSE	TRUE	FALSE	none	none	hocomoco_v11	none	-	-
AHR	SGPL1	0	E	FALSE	FALSE	TRUE	FALSE	none	none	hocomoco_v11	none	-	-
AHR	SGSM1	0	E	FALSE	FALSE	TRUE	FALSE	none	none	hocomoco_v11	none	-	-
AHR	SH3GL3	0	D	FALSE	TRUE	FALSE	FALSE	none	ReMap	none	none	-	-
AHR	SH3PXD2B	0	D	FALSE	TRUE	FALSE	FALSE	none	ReMap	none	none	-	-
AHR	SHANK2	0	D	FALSE	TRUE	FALSE	FALSE	none	ReMap	none	none	-	-
AHR	SHISA9	0	D	FALSE	TRUE	FALSE	FALSE	none	ReMap	none	none	-	-
AHR	SHPRH	0	E	FALSE	FALSE	TRUE	FALSE	none	none	hocomoco_v11	none	-	-
AHR	SIPA1L1	0	D	FALSE	TRUE	FALSE	FALSE	none	ReMap	none	none	-	-
AHR	SIPA1L2	0	D	FALSE	TRUE	FALSE	FALSE	none	ReMap	none	none	-	-
AHR	SIRT2	0	E	FALSE	FALSE	TRUE	FALSE	none	none	hocomoco_v11	none	-	-
AHR	SKP1	0	E	FALSE	FALSE	TRUE	FALSE	none	none	hocomoco_v11	none	-	-
AHR	SLAIN1	0	E	FALSE	FALSE	TRUE	FALSE	none	none	hocomoco_v11	none	-	-
AHR	SLC1A5	0	E	FALSE	FALSE	TRUE	FALSE	none	none	hocomoco_v11	none	-	-
AHR	SLC1A6	0	E	FALSE	FALSE	TRUE	FALSE	none	none	hocomoco_v11	none	-	-
AHR	SLC22A23	0	D	FALSE	TRUE	FALSE	FALSE	none	ReMap	none	none	-	-
AHR	SLC25A12	0	E	FALSE	FALSE	TRUE	FALSE	none	none	hocomoco_v11	none	-	-
AHR	SLC26A7	0	D	FALSE	TRUE	FALSE	FALSE	none	ReMap	none	none	-	-
AHR	SLC27A5	0	E	FALSE	FALSE	TRUE	FALSE	none	none	hocomoco_v11	none	-	-
AHR	SLC30A6	0	E	FALSE	FALSE	TRUE	FALSE	none	none	hocomoco_v11	none	-	-
AHR	SLC38A1	0	D	FALSE	TRUE	FALSE	FALSE	none	ReMap	none	none	-	-
AHR	SLC6A17	0	E	FALSE	FALSE	TRUE	FALSE	none	none	hocomoco_v11	none	-	-
AHR	SLC8A1	0	D	FALSE	TRUE	FALSE	FALSE	none	ReMap	none	none	-	-
AHR	SLCO3A1	0	D	FALSE	TRUE	FALSE	FALSE	none	ReMap	none	none	-	-
AHR	SLIT3	0	D	FALSE	TRUE	FALSE	FALSE	none	ReMap	none	none	-	-
AHR	SLITRK1	0	E	FALSE	FALSE	TRUE	FALSE	none	none	hocomoco_v11	none	-	-
AHR	SMAP2	0	E	FALSE	FALSE	TRUE	FALSE	none	none	hocomoco_v11	none	-	-
AHR	SMG6	0	E	FALSE	FALSE	TRUE	FALSE	none	none	hocomoco_v11	none	-	-
AHR	SMIM12	0	E	FALSE	FALSE	TRUE	FALSE	none	none	hocomoco_v11	none	-	-
AHR	SMIM6	0	E	FALSE	FALSE	TRUE	FALSE	none	none	hocomoco_v11	none	-	-
AHR	SMOC1	0	D	FALSE	TRUE	FALSE	FALSE	none	ReMap	none	none	-	-
AHR	SMYD3	0	D	FALSE	TRUE	FALSE	FALSE	none	ReMap	none	none	-	-
AHR	SNAP91	0	E	FALSE	FALSE	TRUE	FALSE	none	none	hocomoco_v11	none	-	-
AHR	SND1	0	D	FALSE	TRUE	FALSE	FALSE	none	ReMap	none	none	-	-
AHR	SORCS1	0	D	FALSE	TRUE	FALSE	FALSE	none	ReMap	none	none	-	-
AHR	SORCS3	0	E	FALSE	FALSE	TRUE	FALSE	none	none	hocomoco_v11	none	-	-
AHR	SOS1	0	C	TRUE	FALSE	TRUE	FALSE	HTRIdb	none	hocomoco_v11	none	20950586	-
AHR	SOX2	0	D	FALSE	TRUE	FALSE	FALSE	none	ReMap	none	none	-	-
AHR	SOX5	0	D	FALSE	TRUE	FALSE	FALSE	none	ReMap	none	none	-	-
AHR	SOX9	0	D	FALSE	TRUE	FALSE	FALSE	none	ReMap	none	none	-	-
AHR	SP1	0	E	FALSE	FALSE	TRUE	FALSE	none	none	hocomoco_v11	none	-	-
AHR	SPAG16	0	D	FALSE	TRUE	FALSE	FALSE	none	ReMap	none	none	-	-
AHR	SPAG17	0	D	FALSE	TRUE	FALSE	FALSE	none	ReMap	none	none	-	-
AHR	SPAG8	0	E	FALSE	FALSE	TRUE	FALSE	none	none	hocomoco_v11	none	-	-
AHR	SPATA17	0	D	FALSE	TRUE	FALSE	FALSE	none	ReMap	none	none	-	-
AHR	SPATA2	0	E	FALSE	FALSE	TRUE	FALSE	none	none	hocomoco_v11	none	-	-
AHR	SPATS2L	0	D	FALSE	TRUE	FALSE	FALSE	none	ReMap	none	none	-	-
AHR	SPIDR	0	D	FALSE	TRUE	FALSE	FALSE	none	ReMap	none	none	-	-
AHR	SPIN1	0	E	FALSE	FALSE	TRUE	FALSE	none	none	hocomoco_v11	none	-	-
AHR	SPOCK1	0	D	FALSE	TRUE	FALSE	FALSE	none	ReMap	none	none	-	-
AHR	SPTBN1	0	D	FALSE	TRUE	FALSE	FALSE	none	ReMap	none	none	-	-
AHR	SRGAP3	0	D	FALSE	TRUE	FALSE	FALSE	none	ReMap	none	none	-	-
AHR	SRM	0	E	FALSE	FALSE	TRUE	FALSE	none	none	hocomoco_v11	none	-	-
AHR	SRRM1P2	0	D	FALSE	TRUE	FALSE	FALSE	none	ReMap	none	none	-	-
AHR	SRRM2	0	E	FALSE	FALSE	TRUE	FALSE	none	none	hocomoco_v11	none	-	-
AHR	SSBP2	0	D	FALSE	TRUE	FALSE	FALSE	none	ReMap	none	none	-	-
AHR	SSRP1	0	E	FALSE	FALSE	TRUE	FALSE	none	none	hocomoco_v11	none	-	-
AHR	ST18	0	D	FALSE	TRUE	FALSE	FALSE	none	ReMap	none	none	-	-
AHR	ST6GAL2	0	E	FALSE	FALSE	TRUE	FALSE	none	none	hocomoco_v11	none	-	-
AHR	ST6GALNAC5	0	E	FALSE	FALSE	TRUE	FALSE	none	none	hocomoco_v11	none	-	-
AHR	ST8SIA5	0	E	FALSE	FALSE	TRUE	FALSE	none	none	hocomoco_v11	none	-	-
AHR	STARD13	0	D	FALSE	TRUE	FALSE	FALSE	none	ReMap	none	none	-	-
AHR	STC2	0	E	FALSE	FALSE	TRUE	FALSE	none	none	hocomoco_v11	none	-	-
AHR	STK3	0	D	FALSE	TRUE	FALSE	FALSE	none	ReMap	none	none	-	-
AHR	STK39	0	D	FALSE	TRUE	FALSE	FALSE	none	ReMap	none	none	-	-
AHR	STMND1	0	D	FALSE	TRUE	FALSE	FALSE	none	ReMap	none	none	-	-
AHR	STXBP6	0	D	FALSE	TRUE	FALSE	FALSE	none	ReMap	none	none	-	-
AHR	SUGCT	0	E	FALSE	FALSE	TRUE	FALSE	none	none	hocomoco_v11	none	-	-
AHR	SULF2	0	D	FALSE	TRUE	FALSE	FALSE	none	ReMap	none	none	-	-
AHR	SULT1A2	0	E	FALSE	FALSE	TRUE	FALSE	none	none	hocomoco_v11	none	-	-
AHR	SUMO1P1	0	D	FALSE	TRUE	FALSE	FALSE	none	ReMap	none	none	-	-
AHR	SUSD6	0	E	FALSE	FALSE	TRUE	FALSE	none	none	hocomoco_v11	none	-	-
AHR	SV2B	0	D	FALSE	TRUE	FALSE	FALSE	none	ReMap	none	none	-	-
AHR	SVIL	0	D	FALSE	TRUE	FALSE	FALSE	none	ReMap	none	none	-	-
AHR	SWI5	0	E	FALSE	FALSE	TRUE	FALSE	none	none	hocomoco_v11	none	-	-
AHR	SYBU	0	D	FALSE	TRUE	FALSE	FALSE	none	ReMap	none	none	-	-
AHR	SYCP2L	0	E	FALSE	FALSE	TRUE	FALSE	none	none	hocomoco_v11	none	-	-
AHR	SYNE1	0	D	FALSE	TRUE	FALSE	FALSE	none	ReMap	none	none	-	-
AHR	SYNE2	0	D	FALSE	TRUE	FALSE	FALSE	none	ReMap	none	none	-	-
AHR	SYNPR	0	D	FALSE	TRUE	FALSE	FALSE	none	ReMap	none	none	-	-
AHR	SYPL2	0	E	FALSE	FALSE	TRUE	FALSE	none	none	hocomoco_v11	none	-	-
AHR	SYT1	0	D	FALSE	TRUE	FALSE	FALSE	none	ReMap	none	none	-	-
AHR	SYT6	0	D	FALSE	TRUE	FALSE	FALSE	none	ReMap	none	none	-	-
AHR	TACC1	0	E	FALSE	FALSE	TRUE	FALSE	none	none	hocomoco_v11	none	-	-
AHR	TACC2	0	D	FALSE	TRUE	FALSE	FALSE	none	ReMap	none	none	-	-
AHR	TADA2A	0	E	FALSE	FALSE	TRUE	FALSE	none	none	hocomoco_v11	none	-	-
AHR	TANC2	0	D	FALSE	TRUE	FALSE	FALSE	none	ReMap	none	none	-	-
AHR	TAOK3	0	D	FALSE	TRUE	FALSE	FALSE	none	ReMap	none	none	-	-
AHR	TAS1R3	0	E	FALSE	FALSE	TRUE	FALSE	none	none	hocomoco_v11	none	-	-
AHR	TBC1D19	0	E	FALSE	FALSE	TRUE	FALSE	none	none	hocomoco_v11	none	-	-
AHR	TBC1D5	0	D	FALSE	TRUE	FALSE	FALSE	none	ReMap	none	none	-	-
AHR	TBCD	0	E	FALSE	FALSE	TRUE	FALSE	none	none	hocomoco_v11	none	-	-
AHR	TBX4	0	D	FALSE	TRUE	FALSE	FALSE	none	ReMap	none	none	-	-
AHR	TCF7	0	E	FALSE	FALSE	TRUE	FALSE	none	none	hocomoco_v11	none	-	-
AHR	TECR	0	E	FALSE	FALSE	TRUE	FALSE	none	none	hocomoco_v11	none	-	-
AHR	TENM2	0	D	FALSE	TRUE	FALSE	FALSE	none	ReMap	none	none	-	-
AHR	TENM4	0	D	FALSE	TRUE	FALSE	FALSE	none	ReMap	none	none	-	-
AHR	TES	0	E	FALSE	FALSE	TRUE	FALSE	none	none	hocomoco_v11	none	-	-
AHR	TEX101	0	E	FALSE	FALSE	TRUE	FALSE	none	none	hocomoco_v11	none	-	-
AHR	TEX30	0	E	FALSE	FALSE	TRUE	FALSE	none	none	hocomoco_v11	none	-	-
AHR	TEX41	0	D	FALSE	TRUE	FALSE	FALSE	none	ReMap	none	none	-	-
AHR	TG	0	D	FALSE	TRUE	FALSE	FALSE	none	ReMap	none	none	-	-
AHR	TGFBR3	0	E	FALSE	FALSE	TRUE	FALSE	none	none	hocomoco_v11	none	-	-
AHR	THADA	0	D	FALSE	TRUE	FALSE	FALSE	none	ReMap	none	none	-	-
AHR	THNSL2	0	E	FALSE	FALSE	TRUE	FALSE	none	none	hocomoco_v11	none	-	-
AHR	THSD4	0	D	FALSE	TRUE	FALSE	FALSE	none	ReMap	none	none	-	-
AHR	THSD7B	0	D	FALSE	TRUE	FALSE	FALSE	none	ReMap	none	none	-	-
AHR	TIAM1	0	D	FALSE	TRUE	FALSE	FALSE	none	ReMap	none	none	-	-
AHR	TIPRL	0	E	FALSE	FALSE	TRUE	FALSE	none	none	hocomoco_v11	none	-	-
AHR	TLK1	0	D	FALSE	TRUE	FALSE	FALSE	none	ReMap	none	none	-	-
AHR	TLL2	0	E	FALSE	FALSE	TRUE	FALSE	none	none	hocomoco_v11	none	-	-
AHR	TLN2	0	D	FALSE	TRUE	FALSE	FALSE	none	ReMap	none	none	-	-
AHR	TM2D3	0	E	FALSE	FALSE	TRUE	FALSE	none	none	hocomoco_v11	none	-	-
AHR	TMEM108	0	D	FALSE	TRUE	FALSE	FALSE	none	ReMap	none	none	-	-
AHR	TMEM123	0	E	FALSE	FALSE	TRUE	FALSE	none	none	hocomoco_v11	none	-	-
AHR	TMEM132B	0	D	FALSE	TRUE	FALSE	FALSE	none	ReMap	none	none	-	-
AHR	TMEM14B	0	E	FALSE	FALSE	TRUE	FALSE	none	none	hocomoco_v11	none	-	-
AHR	TMEM163	0	D	FALSE	TRUE	FALSE	FALSE	none	ReMap	none	none	-	-
AHR	TMEM185A	0	E	FALSE	FALSE	TRUE	FALSE	none	none	hocomoco_v11	none	-	-
AHR	TMEM261	0	E	FALSE	FALSE	TRUE	FALSE	none	none	hocomoco_v11	none	-	-
AHR	TMEM63C	0	E	FALSE	FALSE	TRUE	FALSE	none	none	hocomoco_v11	none	-	-
AHR	TMTC2	0	D	FALSE	TRUE	FALSE	FALSE	none	ReMap	none	none	-	-
AHR	TNFSF12	0	E	FALSE	FALSE	TRUE	FALSE	none	none	hocomoco_v11	none	-	-
AHR	TNFSF12-TNFSF13	0	E	FALSE	FALSE	TRUE	FALSE	none	none	hocomoco_v11	none	-	-
AHR	TNIK	0	D	FALSE	TRUE	FALSE	FALSE	none	ReMap	none	none	-	-
AHR	TNIP1	0	E	FALSE	FALSE	TRUE	FALSE	none	none	hocomoco_v11	none	-	-
AHR	TNR	0	D	FALSE	TRUE	FALSE	FALSE	none	ReMap	none	none	-	-
AHR	TNS3	0	D	FALSE	TRUE	FALSE	FALSE	none	ReMap	none	none	-	-
AHR	TPRG1	0	D	FALSE	TRUE	FALSE	FALSE	none	ReMap	none	none	-	-
AHR	TRAPPC9	0	D	FALSE	TRUE	FALSE	FALSE	none	ReMap	none	none	-	-
AHR	TRIM37	0	C	FALSE	TRUE	TRUE	FALSE	none	ReMap	hocomoco_v11	none	-	-
AHR	TRIO	0	C	FALSE	TRUE	TRUE	FALSE	none	ReMap	hocomoco_v11	none	-	-
AHR	TRMT10C	0	E	FALSE	FALSE	TRUE	FALSE	none	none	hocomoco_v11	none	-	-
AHR	TRPM3	0	D	FALSE	TRUE	FALSE	FALSE	none	ReMap	none	none	-	-
AHR	TRPS1	0	D	FALSE	TRUE	FALSE	FALSE	none	ReMap	none	none	-	-
AHR	TSHZ2	0	D	FALSE	TRUE	FALSE	FALSE	none	ReMap	none	none	-	-
AHR	TSNAX	0	E	FALSE	FALSE	TRUE	FALSE	none	none	hocomoco_v11	none	-	-
AHR	TSPAN4	0	E	FALSE	FALSE	TRUE	FALSE	none	none	hocomoco_v11	none	-	-
AHR	TSPYL2	0	E	FALSE	FALSE	TRUE	FALSE	none	none	hocomoco_v11	none	-	-
AHR	TSR3	0	E	FALSE	FALSE	TRUE	FALSE	none	none	hocomoco_v11	none	-	-
AHR	TTC16	0	E	FALSE	FALSE	TRUE	FALSE	none	none	hocomoco_v11	none	-	-
AHR	TTLL5	0	D	FALSE	TRUE	FALSE	FALSE	none	ReMap	none	none	-	-
AHR	TTLL6	0	E	FALSE	FALSE	TRUE	FALSE	none	none	hocomoco_v11	none	-	-
AHR	TULP3	0	E	FALSE	FALSE	TRUE	FALSE	none	none	hocomoco_v11	none	-	-
AHR	UBAP2L	0	E	FALSE	FALSE	TRUE	FALSE	none	none	hocomoco_v11	none	-	-
AHR	UBE2I	0	E	FALSE	FALSE	TRUE	FALSE	none	none	hocomoco_v11	none	-	-
AHR	UBE2S	0	E	FALSE	FALSE	TRUE	FALSE	none	none	hocomoco_v11	none	-	-
AHR	UGT1A1	1	D	TRUE	FALSE	FALSE	FALSE	trrust	none	none	none	18172616	-
AHR	UGT1A6	0	A	TRUE	FALSE	FALSE	FALSE	HTRIdb,trrust	none	none	none	9466822	-
AHR	UNC13C	0	D	FALSE	TRUE	FALSE	FALSE	none	ReMap	none	none	-	-
AHR	UNC5C	0	E	FALSE	FALSE	TRUE	FALSE	none	none	hocomoco_v11	none	-	-
AHR	UNC80	0	E	FALSE	FALSE	TRUE	FALSE	none	none	hocomoco_v11	none	-	-
AHR	UPF2	0	E	FALSE	FALSE	TRUE	FALSE	none	none	hocomoco_v11	none	-	-
AHR	UPP1	0	E	FALSE	FALSE	TRUE	FALSE	none	none	hocomoco_v11	none	-	-
AHR	UQCRB	0	E	FALSE	FALSE	TRUE	FALSE	none	none	hocomoco_v11	none	-	-
AHR	USH2A	0	D	FALSE	TRUE	FALSE	FALSE	none	ReMap	none	none	-	-
AHR	USP32	0	D	FALSE	TRUE	FALSE	FALSE	none	ReMap	none	none	-	-
AHR	USP36	0	E	FALSE	FALSE	TRUE	FALSE	none	none	hocomoco_v11	none	-	-
AHR	USP44	0	E	FALSE	FALSE	TRUE	FALSE	none	none	hocomoco_v11	none	-	-
AHR	USP6NL	0	E	FALSE	FALSE	TRUE	FALSE	none	none	hocomoco_v11	none	-	-
AHR	UTRN	0	C	FALSE	TRUE	TRUE	FALSE	none	ReMap	hocomoco_v11	none	-	-
AHR	UVRAG	0	D	FALSE	TRUE	FALSE	FALSE	none	ReMap	none	none	-	-
AHR	VAV3	0	D	FALSE	TRUE	FALSE	FALSE	none	ReMap	none	none	-	-
AHR	VGLL4	0	C	FALSE	TRUE	TRUE	FALSE	none	ReMap	hocomoco_v11	none	-	-
AHR	VPS13B	0	D	FALSE	TRUE	FALSE	FALSE	none	ReMap	none	none	-	-
AHR	VPS8	0	D	FALSE	TRUE	FALSE	FALSE	none	ReMap	none	none	-	-
AHR	VTI1A	0	E	FALSE	FALSE	TRUE	FALSE	none	none	hocomoco_v11	none	-	-
AHR	WDR4	0	E	FALSE	FALSE	TRUE	FALSE	none	none	hocomoco_v11	none	-	-
AHR	WDR72	0	D	FALSE	TRUE	FALSE	FALSE	none	ReMap	none	none	-	-
AHR	WSCD1	0	D	FALSE	TRUE	FALSE	FALSE	none	ReMap	none	none	-	-
AHR	WTAP	0	E	FALSE	FALSE	TRUE	FALSE	none	none	hocomoco_v11	none	-	-
AHR	XPO5	0	E	FALSE	FALSE	TRUE	FALSE	none	none	hocomoco_v11	none	-	-
AHR	XXYLT1	0	D	FALSE	TRUE	FALSE	FALSE	none	ReMap	none	none	-	-
AHR	XYLT1	0	D	FALSE	TRUE	FALSE	FALSE	none	ReMap	none	none	-	-
AHR	YIPF3	0	E	FALSE	FALSE	TRUE	FALSE	none	none	hocomoco_v11	none	-	-
AHR	ZBTB20	0	D	FALSE	TRUE	FALSE	FALSE	none	ReMap	none	none	-	-
AHR	ZC3H15	0	E	FALSE	FALSE	TRUE	FALSE	none	none	hocomoco_v11	none	-	-
AHR	ZCCHC7	0	E	FALSE	FALSE	TRUE	FALSE	none	none	hocomoco_v11	none	-	-
AHR	ZDHHC6	0	E	FALSE	FALSE	TRUE	FALSE	none	none	hocomoco_v11	none	-	-
AHR	ZFAT	0	D	FALSE	TRUE	FALSE	FALSE	none	ReMap	none	none	-	-
AHR	ZFP42	0	E	FALSE	FALSE	TRUE	FALSE	none	none	hocomoco_v11	none	-	-
AHR	ZFPM2	0	D	FALSE	TRUE	FALSE	FALSE	none	ReMap	none	none	-	-
AHR	ZFY	0	E	FALSE	FALSE	TRUE	FALSE	none	none	hocomoco_v11	none	-	-
AHR	ZMIZ1	0	D	FALSE	TRUE	FALSE	FALSE	none	ReMap	none	none	-	-
AHR	ZMYM2	0	E	FALSE	FALSE	TRUE	FALSE	none	none	hocomoco_v11	none	-	-
AHR	ZMYND11	0	E	FALSE	FALSE	TRUE	FALSE	none	none	hocomoco_v11	none	-	-
AHR	ZMYND8	0	D	FALSE	TRUE	FALSE	FALSE	none	ReMap	none	none	-	-
AHR	ZNF217	0	D	FALSE	TRUE	FALSE	FALSE	none	ReMap	none	none	-	-
AHR	ZNF239	0	E	FALSE	FALSE	TRUE	FALSE	none	none	hocomoco_v11	none	-	-
AHR	ZNF260	0	E	FALSE	FALSE	TRUE	FALSE	none	none	hocomoco_v11	none	-	-
AHR	ZNF311	0	E	FALSE	FALSE	TRUE	FALSE	none	none	hocomoco_v11	none	-	-
AHR	ZNF343	0	E	FALSE	FALSE	TRUE	FALSE	none	none	hocomoco_v11	none	-	-
AHR	ZNF365	0	D	FALSE	TRUE	FALSE	FALSE	none	ReMap	none	none	-	-
AHR	ZNF385B	0	D	FALSE	TRUE	FALSE	FALSE	none	ReMap	none	none	-	-
AHR	ZNF385D	0	D	FALSE	TRUE	FALSE	FALSE	none	ReMap	none	none	-	-
AHR	ZNF410	0	E	FALSE	FALSE	TRUE	FALSE	none	none	hocomoco_v11	none	-	-
AHR	ZNF462	0	D	FALSE	TRUE	FALSE	FALSE	none	ReMap	none	none	-	-
AHR	ZNF526	0	E	FALSE	FALSE	TRUE	FALSE	none	none	hocomoco_v11	none	-	-
AHR	ZNF547	0	E	FALSE	FALSE	TRUE	FALSE	none	none	hocomoco_v11	none	-	-
AHR	ZNF548	0	E	FALSE	FALSE	TRUE	FALSE	none	none	hocomoco_v11	none	-	-
AHR	ZNF92	0	E	FALSE	FALSE	TRUE	FALSE	none	none	hocomoco_v11	none	-	-
AHR	ZPLD1	0	D	FALSE	TRUE	FALSE	FALSE	none	ReMap	none	none	-	-
AIRE	ACACA	0	E	FALSE	FALSE	TRUE	FALSE	none	none	hocomoco_v11	none	-	-
AIRE	ACE2	0	E	FALSE	FALSE	TRUE	FALSE	none	none	hocomoco_v11	none	-	-
AIRE	ACOT11	0	E	FALSE	FALSE	TRUE	FALSE	none	none	hocomoco_v11	none	-	-
AIRE	ACVR1B	0	E	FALSE	FALSE	TRUE	FALSE	none	none	hocomoco_v11	none	-	-
AIRE	ADAM10	0	E	FALSE	FALSE	TRUE	FALSE	none	none	hocomoco_v11	none	-	-
AIRE	ADAMTS9	0	E	FALSE	FALSE	TRUE	FALSE	none	none	hocomoco_v11	none	-	-
AIRE	ADGRF1	0	E	FALSE	FALSE	TRUE	FALSE	none	none	hocomoco_v11	none	-	-
AIRE	AGPAT5	0	E	FALSE	FALSE	TRUE	FALSE	none	none	hocomoco_v11	none	-	-
AIRE	AHCYL1	0	E	FALSE	FALSE	TRUE	FALSE	none	none	hocomoco_v11	none	-	-
AIRE	ALKBH8	0	E	FALSE	FALSE	TRUE	FALSE	none	none	hocomoco_v11	none	-	-
AIRE	ALOXE3	0	E	FALSE	FALSE	TRUE	FALSE	none	none	hocomoco_v11	none	-	-
AIRE	ANAPC13	0	E	FALSE	FALSE	TRUE	FALSE	none	none	hocomoco_v11	none	-	-
AIRE	ANAPC7	0	E	FALSE	FALSE	TRUE	FALSE	none	none	hocomoco_v11	none	-	-
AIRE	ANKRD13A	0	E	FALSE	FALSE	TRUE	FALSE	none	none	hocomoco_v11	none	-	-
AIRE	ANKRD22	0	E	FALSE	FALSE	TRUE	FALSE	none	none	hocomoco_v11	none	-	-
AIRE	ANO4	0	E	FALSE	FALSE	TRUE	FALSE	none	none	hocomoco_v11	none	-	-
AIRE	APOL1	0	E	FALSE	FALSE	TRUE	FALSE	none	none	hocomoco_v11	none	-	-
AIRE	APTX	0	E	FALSE	FALSE	TRUE	FALSE	none	none	hocomoco_v11	none	-	-
AIRE	ARHGAP10	0	E	FALSE	FALSE	TRUE	FALSE	none	none	hocomoco_v11	none	-	-
AIRE	ARHGAP32	0	E	FALSE	FALSE	TRUE	FALSE	none	none	hocomoco_v11	none	-	-
AIRE	ARHGEF28	0	E	FALSE	FALSE	TRUE	FALSE	none	none	hocomoco_v11	none	-	-
AIRE	ARID4A	0	E	FALSE	FALSE	TRUE	FALSE	none	none	hocomoco_v11	none	-	-
AIRE	ARMC8	0	E	FALSE	FALSE	TRUE	FALSE	none	none	hocomoco_v11	none	-	-
AIRE	ARNT2	0	E	FALSE	FALSE	TRUE	FALSE	none	none	hocomoco_v11	none	-	-
AIRE	ASAP3	0	E	FALSE	FALSE	TRUE	FALSE	none	none	hocomoco_v11	none	-	-
AIRE	ASB12	0	E	FALSE	FALSE	TRUE	FALSE	none	none	hocomoco_v11	none	-	-
AIRE	ATP1A1	0	E	FALSE	FALSE	TRUE	FALSE	none	none	hocomoco_v11	none	-	-
AIRE	ATP2A3	0	E	FALSE	FALSE	TRUE	FALSE	none	none	hocomoco_v11	none	-	-
AIRE	ATP6V1E2	0	E	FALSE	FALSE	TRUE	FALSE	none	none	hocomoco_v11	none	-	-
AIRE	ATP6V1G3	0	E	FALSE	FALSE	TRUE	FALSE	none	none	hocomoco_v11	none	-	-
AIRE	ATXN7	0	E	FALSE	FALSE	TRUE	FALSE	none	none	hocomoco_v11	none	-	-
AIRE	ATXN7L3	0	E	FALSE	FALSE	TRUE	FALSE	none	none	hocomoco_v11	none	-	-
AIRE	AZI2	0	E	FALSE	FALSE	TRUE	FALSE	none	none	hocomoco_v11	none	-	-
AIRE	BBOF1	0	E	FALSE	FALSE	TRUE	FALSE	none	none	hocomoco_v11	none	-	-
AIRE	BCAT1	0	E	FALSE	FALSE	TRUE	FALSE	none	none	hocomoco_v11	none	-	-
AIRE	BDH2	0	E	FALSE	FALSE	TRUE	FALSE	none	none	hocomoco_v11	none	-	-
AIRE	BEGAIN	0	E	FALSE	FALSE	TRUE	FALSE	none	none	hocomoco_v11	none	-	-
AIRE	BIRC2	0	E	FALSE	FALSE	TRUE	FALSE	none	none	hocomoco_v11	none	-	-
AIRE	BRD7	0	E	FALSE	FALSE	TRUE	FALSE	none	none	hocomoco_v11	none	-	-
AIRE	BRI3BP	0	E	FALSE	FALSE	TRUE	FALSE	none	none	hocomoco_v11	none	-	-
AIRE	BTBD7	0	E	FALSE	FALSE	TRUE	FALSE	none	none	hocomoco_v11	none	-	-
AIRE	C11orf16	0	E	FALSE	FALSE	TRUE	FALSE	none	none	hocomoco_v11	none	-	-
AIRE	C11orf40	0	E	FALSE	FALSE	TRUE	FALSE	none	none	hocomoco_v11	none	-	-
AIRE	C12orf56	0	E	FALSE	FALSE	TRUE	FALSE	none	none	hocomoco_v11	none	-	-
AIRE	C19orf44	0	E	FALSE	FALSE	TRUE	FALSE	none	none	hocomoco_v11	none	-	-
AIRE	C1orf131	0	E	FALSE	FALSE	TRUE	FALSE	none	none	hocomoco_v11	none	-	-
AIRE	C2orf88	0	E	FALSE	FALSE	TRUE	FALSE	none	none	hocomoco_v11	none	-	-
AIRE	C3orf22	0	E	FALSE	FALSE	TRUE	FALSE	none	none	hocomoco_v11	none	-	-
AIRE	C3orf36	0	E	FALSE	FALSE	TRUE	FALSE	none	none	hocomoco_v11	none	-	-
AIRE	C3orf38	0	E	FALSE	FALSE	TRUE	FALSE	none	none	hocomoco_v11	none	-	-
AIRE	C8orf46	0	E	FALSE	FALSE	TRUE	FALSE	none	none	hocomoco_v11	none	-	-
AIRE	C8orf89	0	E	FALSE	FALSE	TRUE	FALSE	none	none	hocomoco_v11	none	-	-
AIRE	C9orf64	0	E	FALSE	FALSE	TRUE	FALSE	none	none	hocomoco_v11	none	-	-
AIRE	CAMK2D	0	E	FALSE	FALSE	TRUE	FALSE	none	none	hocomoco_v11	none	-	-
AIRE	CASD1	0	E	FALSE	FALSE	TRUE	FALSE	none	none	hocomoco_v11	none	-	-
AIRE	CCDC182	0	E	FALSE	FALSE	TRUE	FALSE	none	none	hocomoco_v11	none	-	-
AIRE	CCDC77	0	E	FALSE	FALSE	TRUE	FALSE	none	none	hocomoco_v11	none	-	-
AIRE	CCND1	0	E	FALSE	FALSE	TRUE	FALSE	none	none	hocomoco_v11	none	-	-
AIRE	CCNYL1	0	E	FALSE	FALSE	TRUE	FALSE	none	none	hocomoco_v11	none	-	-
AIRE	CD1C	0	E	FALSE	FALSE	TRUE	FALSE	none	none	hocomoco_v11	none	-	-
AIRE	CD302	0	E	FALSE	FALSE	TRUE	FALSE	none	none	hocomoco_v11	none	-	-
AIRE	CDC27	0	E	FALSE	FALSE	TRUE	FALSE	none	none	hocomoco_v11	none	-	-
AIRE	CDH19	0	E	FALSE	FALSE	TRUE	FALSE	none	none	hocomoco_v11	none	-	-
AIRE	CDK5RAP1	0	E	FALSE	FALSE	TRUE	FALSE	none	none	hocomoco_v11	none	-	-
AIRE	CDKAL1	0	E	FALSE	FALSE	TRUE	FALSE	none	none	hocomoco_v11	none	-	-
AIRE	CDKL5	0	E	FALSE	FALSE	TRUE	FALSE	none	none	hocomoco_v11	none	-	-
AIRE	CDR2L	0	E	FALSE	FALSE	TRUE	FALSE	none	none	hocomoco_v11	none	-	-
AIRE	CDS1	0	E	FALSE	FALSE	TRUE	FALSE	none	none	hocomoco_v11	none	-	-
AIRE	CGGBP1	0	E	FALSE	FALSE	TRUE	FALSE	none	none	hocomoco_v11	none	-	-
AIRE	CHN1	0	E	FALSE	FALSE	TRUE	FALSE	none	none	hocomoco_v11	none	-	-
AIRE	CHRNA1	0	D	TRUE	FALSE	FALSE	FALSE	trrust	none	none	none	17687331	-
AIRE	CHRNA3	0	E	FALSE	FALSE	TRUE	FALSE	none	none	hocomoco_v11	none	-	-
AIRE	CKAP2L	0	E	FALSE	FALSE	TRUE	FALSE	none	none	hocomoco_v11	none	-	-
AIRE	CLASP2	0	E	FALSE	FALSE	TRUE	FALSE	none	none	hocomoco_v11	none	-	-
AIRE	CLCN5	0	E	FALSE	FALSE	TRUE	FALSE	none	none	hocomoco_v11	none	-	-
AIRE	CLEC12A	0	E	FALSE	FALSE	TRUE	FALSE	none	none	hocomoco_v11	none	-	-
AIRE	CLLU1	0	E	FALSE	FALSE	TRUE	FALSE	none	none	hocomoco_v11	none	-	-
AIRE	CLMN	0	E	FALSE	FALSE	TRUE	FALSE	none	none	hocomoco_v11	none	-	-
AIRE	CNBD1	0	E	FALSE	FALSE	TRUE	FALSE	none	none	hocomoco_v11	none	-	-
AIRE	CNEP1R1	0	E	FALSE	FALSE	TRUE	FALSE	none	none	hocomoco_v11	none	-	-
AIRE	COBLL1	0	E	FALSE	FALSE	TRUE	FALSE	none	none	hocomoco_v11	none	-	-
AIRE	COL4A5	0	E	FALSE	FALSE	TRUE	FALSE	none	none	hocomoco_v11	none	-	-
AIRE	COQ7	0	E	FALSE	FALSE	TRUE	FALSE	none	none	hocomoco_v11	none	-	-
AIRE	CPA5	0	E	FALSE	FALSE	TRUE	FALSE	none	none	hocomoco_v11	none	-	-
AIRE	CPB1	0	E	FALSE	FALSE	TRUE	FALSE	none	none	hocomoco_v11	none	-	-
AIRE	CPEB1	0	E	FALSE	FALSE	TRUE	FALSE	none	none	hocomoco_v11	none	-	-
AIRE	CSK	0	E	FALSE	FALSE	TRUE	FALSE	none	none	hocomoco_v11	none	-	-
AIRE	CSMD3	0	E	FALSE	FALSE	TRUE	FALSE	none	none	hocomoco_v11	none	-	-
AIRE	CTSB	0	E	FALSE	FALSE	TRUE	FALSE	none	none	hocomoco_v11	none	-	-
AIRE	CUL1	0	E	FALSE	FALSE	TRUE	FALSE	none	none	hocomoco_v11	none	-	-
AIRE	CXCL6	0	E	FALSE	FALSE	TRUE	FALSE	none	none	hocomoco_v11	none	-	-
AIRE	CYLC2	0	E	FALSE	FALSE	TRUE	FALSE	none	none	hocomoco_v11	none	-	-
AIRE	CYP26B1	0	E	FALSE	FALSE	TRUE	FALSE	none	none	hocomoco_v11	none	-	-
AIRE	DACH1	0	E	FALSE	FALSE	TRUE	FALSE	none	none	hocomoco_v11	none	-	-
AIRE	DCDC1	0	E	FALSE	FALSE	TRUE	FALSE	none	none	hocomoco_v11	none	-	-
AIRE	DCLK3	0	E	FALSE	FALSE	TRUE	FALSE	none	none	hocomoco_v11	none	-	-
AIRE	DENND4A	0	E	FALSE	FALSE	TRUE	FALSE	none	none	hocomoco_v11	none	-	-
AIRE	DHX9	0	E	FALSE	FALSE	TRUE	FALSE	none	none	hocomoco_v11	none	-	-
AIRE	DICER1	0	E	FALSE	FALSE	TRUE	FALSE	none	none	hocomoco_v11	none	-	-
AIRE	DLX6	0	E	FALSE	FALSE	TRUE	FALSE	none	none	hocomoco_v11	none	-	-
AIRE	DNAAF5	0	E	FALSE	FALSE	TRUE	FALSE	none	none	hocomoco_v11	none	-	-
AIRE	DNAH1	0	E	FALSE	FALSE	TRUE	FALSE	none	none	hocomoco_v11	none	-	-
AIRE	DOCK9	0	E	FALSE	FALSE	TRUE	FALSE	none	none	hocomoco_v11	none	-	-
AIRE	DTNB	0	E	FALSE	FALSE	TRUE	FALSE	none	none	hocomoco_v11	none	-	-
AIRE	DYRK4	0	E	FALSE	FALSE	TRUE	FALSE	none	none	hocomoco_v11	none	-	-
AIRE	EFCAB13	0	E	FALSE	FALSE	TRUE	FALSE	none	none	hocomoco_v11	none	-	-
AIRE	EGLN1	0	E	FALSE	FALSE	TRUE	FALSE	none	none	hocomoco_v11	none	-	-
AIRE	EID3	0	E	FALSE	FALSE	TRUE	FALSE	none	none	hocomoco_v11	none	-	-
AIRE	EIF3A	0	E	FALSE	FALSE	TRUE	FALSE	none	none	hocomoco_v11	none	-	-
AIRE	EIF3F	0	E	FALSE	FALSE	TRUE	FALSE	none	none	hocomoco_v11	none	-	-
AIRE	ELL2	0	E	FALSE	FALSE	TRUE	FALSE	none	none	hocomoco_v11	none	-	-
AIRE	ENOX1	0	E	FALSE	FALSE	TRUE	FALSE	none	none	hocomoco_v11	none	-	-
AIRE	ENSA	0	E	FALSE	FALSE	TRUE	FALSE	none	none	hocomoco_v11	none	-	-
AIRE	EPHA4	0	E	FALSE	FALSE	TRUE	FALSE	none	none	hocomoco_v11	none	-	-
AIRE	EPHB6	0	E	FALSE	FALSE	TRUE	FALSE	none	none	hocomoco_v11	none	-	-
AIRE	EPN2	0	E	FALSE	FALSE	TRUE	FALSE	none	none	hocomoco_v11	none	-	-
AIRE	ERCC8	0	E	FALSE	FALSE	TRUE	FALSE	none	none	hocomoco_v11	none	-	-
AIRE	ERG	0	E	FALSE	FALSE	TRUE	FALSE	none	none	hocomoco_v11	none	-	-
AIRE	ERV3-1	0	E	FALSE	FALSE	TRUE	FALSE	none	none	hocomoco_v11	none	-	-
AIRE	ESRRG	0	E	FALSE	FALSE	TRUE	FALSE	none	none	hocomoco_v11	none	-	-
AIRE	ETFRF1	0	E	FALSE	FALSE	TRUE	FALSE	none	none	hocomoco_v11	none	-	-
AIRE	EVI5	0	E	FALSE	FALSE	TRUE	FALSE	none	none	hocomoco_v11	none	-	-
AIRE	FABP2	0	E	FALSE	FALSE	TRUE	FALSE	none	none	hocomoco_v11	none	-	-
AIRE	FAM102A	0	E	FALSE	FALSE	TRUE	FALSE	none	none	hocomoco_v11	none	-	-
AIRE	FAM135A	0	E	FALSE	FALSE	TRUE	FALSE	none	none	hocomoco_v11	none	-	-
AIRE	FAM13C	0	E	FALSE	FALSE	TRUE	FALSE	none	none	hocomoco_v11	none	-	-
AIRE	FAM156A	0	E	FALSE	FALSE	TRUE	FALSE	none	none	hocomoco_v11	none	-	-
AIRE	FAM156B	0	E	FALSE	FALSE	TRUE	FALSE	none	none	hocomoco_v11	none	-	-
AIRE	FAM183A	0	E	FALSE	FALSE	TRUE	FALSE	none	none	hocomoco_v11	none	-	-
AIRE	FAM198B	0	E	FALSE	FALSE	TRUE	FALSE	none	none	hocomoco_v11	none	-	-
AIRE	FAM71C	0	E	FALSE	FALSE	TRUE	FALSE	none	none	hocomoco_v11	none	-	-
AIRE	FAM71F2	0	E	FALSE	FALSE	TRUE	FALSE	none	none	hocomoco_v11	none	-	-
AIRE	FANK1	0	E	FALSE	FALSE	TRUE	FALSE	none	none	hocomoco_v11	none	-	-
AIRE	FAS	0	E	FALSE	FALSE	TRUE	FALSE	none	none	hocomoco_v11	none	-	-
AIRE	FBXL13	0	E	FALSE	FALSE	TRUE	FALSE	none	none	hocomoco_v11	none	-	-
AIRE	FBXL5	0	E	FALSE	FALSE	TRUE	FALSE	none	none	hocomoco_v11	none	-	-
AIRE	FBXO24	0	E	FALSE	FALSE	TRUE	FALSE	none	none	hocomoco_v11	none	-	-
AIRE	FBXO38	0	E	FALSE	FALSE	TRUE	FALSE	none	none	hocomoco_v11	none	-	-
AIRE	FGD4	0	E	FALSE	FALSE	TRUE	FALSE	none	none	hocomoco_v11	none	-	-
AIRE	FGFR2	0	E	FALSE	FALSE	TRUE	FALSE	none	none	hocomoco_v11	none	-	-
AIRE	FKBP14	0	E	FALSE	FALSE	TRUE	FALSE	none	none	hocomoco_v11	none	-	-
AIRE	FNTA	0	E	FALSE	FALSE	TRUE	FALSE	none	none	hocomoco_v11	none	-	-
AIRE	FOXD4	0	E	FALSE	FALSE	TRUE	FALSE	none	none	hocomoco_v11	none	-	-
AIRE	FOXD4L5	0	E	FALSE	FALSE	TRUE	FALSE	none	none	hocomoco_v11	none	-	-
AIRE	FOXD4L6	0	E	FALSE	FALSE	TRUE	FALSE	none	none	hocomoco_v11	none	-	-
AIRE	FOXP1	0	E	FALSE	FALSE	TRUE	FALSE	none	none	hocomoco_v11	none	-	-
AIRE	FREM1	0	E	FALSE	FALSE	TRUE	FALSE	none	none	hocomoco_v11	none	-	-
AIRE	FREM2	0	E	FALSE	FALSE	TRUE	FALSE	none	none	hocomoco_v11	none	-	-
AIRE	FXYD6	0	E	FALSE	FALSE	TRUE	FALSE	none	none	hocomoco_v11	none	-	-
AIRE	FXYD6-FXYD2	0	E	FALSE	FALSE	TRUE	FALSE	none	none	hocomoco_v11	none	-	-
AIRE	GFOD1	0	E	FALSE	FALSE	TRUE	FALSE	none	none	hocomoco_v11	none	-	-
AIRE	GLIS3	0	E	FALSE	FALSE	TRUE	FALSE	none	none	hocomoco_v11	none	-	-
AIRE	GLRA3	0	E	FALSE	FALSE	TRUE	FALSE	none	none	hocomoco_v11	none	-	-
AIRE	GLS	0	E	FALSE	FALSE	TRUE	FALSE	none	none	hocomoco_v11	none	-	-
AIRE	GMEB2	0	E	FALSE	FALSE	TRUE	FALSE	none	none	hocomoco_v11	none	-	-
AIRE	GNAI3	0	E	FALSE	FALSE	TRUE	FALSE	none	none	hocomoco_v11	none	-	-
AIRE	GPR141	0	E	FALSE	FALSE	TRUE	FALSE	none	none	hocomoco_v11	none	-	-
AIRE	GPR55	0	E	FALSE	FALSE	TRUE	FALSE	none	none	hocomoco_v11	none	-	-
AIRE	GRB7	0	E	FALSE	FALSE	TRUE	FALSE	none	none	hocomoco_v11	none	-	-
AIRE	HCFC2	0	E	FALSE	FALSE	TRUE	FALSE	none	none	hocomoco_v11	none	-	-
AIRE	HDAC9	0	E	FALSE	FALSE	TRUE	FALSE	none	none	hocomoco_v11	none	-	-
AIRE	HELZ2	0	E	FALSE	FALSE	TRUE	FALSE	none	none	hocomoco_v11	none	-	-
AIRE	HGSNAT	0	E	FALSE	FALSE	TRUE	FALSE	none	none	hocomoco_v11	none	-	-
AIRE	HIST1H3E	0	E	FALSE	FALSE	TRUE	FALSE	none	none	hocomoco_v11	none	-	-
AIRE	HLA-DPA1	0	E	FALSE	FALSE	TRUE	FALSE	none	none	hocomoco_v11	none	-	-
AIRE	HMCN1	0	E	FALSE	FALSE	TRUE	FALSE	none	none	hocomoco_v11	none	-	-
AIRE	HMGB1	0	E	FALSE	FALSE	TRUE	FALSE	none	none	hocomoco_v11	none	-	-
AIRE	HMGB4	0	E	FALSE	FALSE	TRUE	FALSE	none	none	hocomoco_v11	none	-	-
AIRE	HMOX2	0	E	FALSE	FALSE	TRUE	FALSE	none	none	hocomoco_v11	none	-	-
AIRE	HNRNPUL1	0	E	FALSE	FALSE	TRUE	FALSE	none	none	hocomoco_v11	none	-	-
AIRE	HP1BP3	0	E	FALSE	FALSE	TRUE	FALSE	none	none	hocomoco_v11	none	-	-
AIRE	HSD3B2	0	E	FALSE	FALSE	TRUE	FALSE	none	none	hocomoco_v11	none	-	-
AIRE	HTR3B	0	E	FALSE	FALSE	TRUE	FALSE	none	none	hocomoco_v11	none	-	-
AIRE	HTR6	0	E	FALSE	FALSE	TRUE	FALSE	none	none	hocomoco_v11	none	-	-
AIRE	HYDIN	0	E	FALSE	FALSE	TRUE	FALSE	none	none	hocomoco_v11	none	-	-
AIRE	IDO1	0	E	FALSE	FALSE	TRUE	FALSE	none	none	hocomoco_v11	none	-	-
AIRE	IFNA2	0	E	FALSE	FALSE	TRUE	FALSE	none	none	hocomoco_v11	none	-	-
AIRE	IFNG	0	E	FALSE	FALSE	TRUE	FALSE	none	none	hocomoco_v11	none	-	-
AIRE	IGBP1	0	E	FALSE	FALSE	TRUE	FALSE	none	none	hocomoco_v11	none	-	-
AIRE	IL22	0	E	FALSE	FALSE	TRUE	FALSE	none	none	hocomoco_v11	none	-	-
AIRE	ILF3	0	E	FALSE	FALSE	TRUE	FALSE	none	none	hocomoco_v11	none	-	-
AIRE	IQCA1	0	E	FALSE	FALSE	TRUE	FALSE	none	none	hocomoco_v11	none	-	-
AIRE	ITGA6	0	E	FALSE	FALSE	TRUE	FALSE	none	none	hocomoco_v11	none	-	-
AIRE	JMJD1C	0	E	FALSE	FALSE	TRUE	FALSE	none	none	hocomoco_v11	none	-	-
AIRE	KANK2	0	E	FALSE	FALSE	TRUE	FALSE	none	none	hocomoco_v11	none	-	-
AIRE	KCNJ9	0	E	FALSE	FALSE	TRUE	FALSE	none	none	hocomoco_v11	none	-	-
AIRE	KCNMA1	0	E	FALSE	FALSE	TRUE	FALSE	none	none	hocomoco_v11	none	-	-
AIRE	KCNMB2	0	E	FALSE	FALSE	TRUE	FALSE	none	none	hocomoco_v11	none	-	-
AIRE	KCNV2	0	E	FALSE	FALSE	TRUE	FALSE	none	none	hocomoco_v11	none	-	-
AIRE	KHDC1L	0	E	FALSE	FALSE	TRUE	FALSE	none	none	hocomoco_v11	none	-	-
AIRE	KHSRP	0	E	FALSE	FALSE	TRUE	FALSE	none	none	hocomoco_v11	none	-	-
AIRE	KIF20B	0	E	FALSE	FALSE	TRUE	FALSE	none	none	hocomoco_v11	none	-	-
AIRE	KIF2A	0	E	FALSE	FALSE	TRUE	FALSE	none	none	hocomoco_v11	none	-	-
AIRE	KLHL12	0	E	FALSE	FALSE	TRUE	FALSE	none	none	hocomoco_v11	none	-	-
AIRE	KLK11	0	E	FALSE	FALSE	TRUE	FALSE	none	none	hocomoco_v11	none	-	-
AIRE	KPRP	0	E	FALSE	FALSE	TRUE	FALSE	none	none	hocomoco_v11	none	-	-
AIRE	KRTAP1-4	0	E	FALSE	FALSE	TRUE	FALSE	none	none	hocomoco_v11	none	-	-
AIRE	KRTAP19-3	0	E	FALSE	FALSE	TRUE	FALSE	none	none	hocomoco_v11	none	-	-
AIRE	KRTAP22-1	0	E	FALSE	FALSE	TRUE	FALSE	none	none	hocomoco_v11	none	-	-
AIRE	LEAP2	0	E	FALSE	FALSE	TRUE	FALSE	none	none	hocomoco_v11	none	-	-
AIRE	LHX8	0	E	FALSE	FALSE	TRUE	FALSE	none	none	hocomoco_v11	none	-	-
AIRE	LIG1	0	E	FALSE	FALSE	TRUE	FALSE	none	none	hocomoco_v11	none	-	-
AIRE	LPXN	0	E	FALSE	FALSE	TRUE	FALSE	none	none	hocomoco_v11	none	-	-
AIRE	LRRC70	0	E	FALSE	FALSE	TRUE	FALSE	none	none	hocomoco_v11	none	-	-
AIRE	LSM5	0	E	FALSE	FALSE	TRUE	FALSE	none	none	hocomoco_v11	none	-	-
AIRE	LTN1	0	E	FALSE	FALSE	TRUE	FALSE	none	none	hocomoco_v11	none	-	-
AIRE	LUZP6	0	E	FALSE	FALSE	TRUE	FALSE	none	none	hocomoco_v11	none	-	-
AIRE	MAGEA11	0	E	FALSE	FALSE	TRUE	FALSE	none	none	hocomoco_v11	none	-	-
AIRE	MAP3K21	0	E	FALSE	FALSE	TRUE	FALSE	none	none	hocomoco_v11	none	-	-
AIRE	MAP4	0	E	FALSE	FALSE	TRUE	FALSE	none	none	hocomoco_v11	none	-	-
AIRE	MARCH7	0	E	FALSE	FALSE	TRUE	FALSE	none	none	hocomoco_v11	none	-	-
AIRE	MARCH8	0	E	FALSE	FALSE	TRUE	FALSE	none	none	hocomoco_v11	none	-	-
AIRE	MARF1	0	E	FALSE	FALSE	TRUE	FALSE	none	none	hocomoco_v11	none	-	-
AIRE	MBD3	0	E	FALSE	FALSE	TRUE	FALSE	none	none	hocomoco_v11	none	-	-
AIRE	MECOM	0	E	FALSE	FALSE	TRUE	FALSE	none	none	hocomoco_v11	none	-	-
AIRE	METAP1D	0	E	FALSE	FALSE	TRUE	FALSE	none	none	hocomoco_v11	none	-	-
AIRE	MIA	0	E	FALSE	FALSE	TRUE	FALSE	none	none	hocomoco_v11	none	-	-
AIRE	MLH1	0	E	FALSE	FALSE	TRUE	FALSE	none	none	hocomoco_v11	none	-	-
AIRE	MMP24	0	E	FALSE	FALSE	TRUE	FALSE	none	none	hocomoco_v11	none	-	-
AIRE	MOBP	0	E	FALSE	FALSE	TRUE	FALSE	none	none	hocomoco_v11	none	-	-
AIRE	MOV10L1	0	E	FALSE	FALSE	TRUE	FALSE	none	none	hocomoco_v11	none	-	-
AIRE	MRPL37	0	E	FALSE	FALSE	TRUE	FALSE	none	none	hocomoco_v11	none	-	-
AIRE	MRPL46	0	E	FALSE	FALSE	TRUE	FALSE	none	none	hocomoco_v11	none	-	-
AIRE	MSANTD4	0	E	FALSE	FALSE	TRUE	FALSE	none	none	hocomoco_v11	none	-	-
AIRE	MTFMT	0	E	FALSE	FALSE	TRUE	FALSE	none	none	hocomoco_v11	none	-	-
AIRE	MTMR11	0	E	FALSE	FALSE	TRUE	FALSE	none	none	hocomoco_v11	none	-	-
AIRE	MTMR7	0	E	FALSE	FALSE	TRUE	FALSE	none	none	hocomoco_v11	none	-	-
AIRE	MTTP	0	E	FALSE	FALSE	TRUE	FALSE	none	none	hocomoco_v11	none	-	-
AIRE	MUCL1	0	E	FALSE	FALSE	TRUE	FALSE	none	none	hocomoco_v11	none	-	-
AIRE	MYOZ2	0	E	FALSE	FALSE	TRUE	FALSE	none	none	hocomoco_v11	none	-	-
AIRE	NAIP	0	E	FALSE	FALSE	TRUE	FALSE	none	none	hocomoco_v11	none	-	-
AIRE	NAT10	0	E	FALSE	FALSE	TRUE	FALSE	none	none	hocomoco_v11	none	-	-
AIRE	NCALD	0	E	FALSE	FALSE	TRUE	FALSE	none	none	hocomoco_v11	none	-	-
AIRE	NCOA5	0	E	FALSE	FALSE	TRUE	FALSE	none	none	hocomoco_v11	none	-	-
AIRE	NEDD9	0	E	FALSE	FALSE	TRUE	FALSE	none	none	hocomoco_v11	none	-	-
AIRE	NIPSNAP3A	0	E	FALSE	FALSE	TRUE	FALSE	none	none	hocomoco_v11	none	-	-
AIRE	NLGN1	0	E	FALSE	FALSE	TRUE	FALSE	none	none	hocomoco_v11	none	-	-
AIRE	NNMT	0	E	FALSE	FALSE	TRUE	FALSE	none	none	hocomoco_v11	none	-	-
AIRE	NOC3L	0	E	FALSE	FALSE	TRUE	FALSE	none	none	hocomoco_v11	none	-	-
AIRE	NOS1	0	E	FALSE	FALSE	TRUE	FALSE	none	none	hocomoco_v11	none	-	-
AIRE	NOX4	0	E	FALSE	FALSE	TRUE	FALSE	none	none	hocomoco_v11	none	-	-
AIRE	NPC1	0	E	FALSE	FALSE	TRUE	FALSE	none	none	hocomoco_v11	none	-	-
AIRE	NPEPPS	0	E	FALSE	FALSE	TRUE	FALSE	none	none	hocomoco_v11	none	-	-
AIRE	NR1I3	0	E	FALSE	FALSE	TRUE	FALSE	none	none	hocomoco_v11	none	-	-
AIRE	NR2F1	0	E	FALSE	FALSE	TRUE	FALSE	none	none	hocomoco_v11	none	-	-
AIRE	NSMCE4A	0	E	FALSE	FALSE	TRUE	FALSE	none	none	hocomoco_v11	none	-	-
AIRE	NUTM2F	0	E	FALSE	FALSE	TRUE	FALSE	none	none	hocomoco_v11	none	-	-
AIRE	NUTM2G	0	E	FALSE	FALSE	TRUE	FALSE	none	none	hocomoco_v11	none	-	-
AIRE	OCLM	0	E	FALSE	FALSE	TRUE	FALSE	none	none	hocomoco_v11	none	-	-
AIRE	OPA3	0	E	FALSE	FALSE	TRUE	FALSE	none	none	hocomoco_v11	none	-	-
AIRE	OR10V1	0	E	FALSE	FALSE	TRUE	FALSE	none	none	hocomoco_v11	none	-	-
AIRE	OR13C3	0	E	FALSE	FALSE	TRUE	FALSE	none	none	hocomoco_v11	none	-	-
AIRE	OR13C9	0	E	FALSE	FALSE	TRUE	FALSE	none	none	hocomoco_v11	none	-	-
AIRE	OR1N2	0	E	FALSE	FALSE	TRUE	FALSE	none	none	hocomoco_v11	none	-	-
AIRE	OR51B2	0	E	FALSE	FALSE	TRUE	FALSE	none	none	hocomoco_v11	none	-	-
AIRE	OR51E2	0	E	FALSE	FALSE	TRUE	FALSE	none	none	hocomoco_v11	none	-	-
AIRE	OR52R1	0	E	FALSE	FALSE	TRUE	FALSE	none	none	hocomoco_v11	none	-	-
AIRE	OR8U1	0	E	FALSE	FALSE	TRUE	FALSE	none	none	hocomoco_v11	none	-	-
AIRE	ORC1	0	E	FALSE	FALSE	TRUE	FALSE	none	none	hocomoco_v11	none	-	-
AIRE	OSBP2	0	E	FALSE	FALSE	TRUE	FALSE	none	none	hocomoco_v11	none	-	-
AIRE	OSBPL9	0	E	FALSE	FALSE	TRUE	FALSE	none	none	hocomoco_v11	none	-	-
AIRE	OSCAR	0	E	FALSE	FALSE	TRUE	FALSE	none	none	hocomoco_v11	none	-	-
AIRE	OSM	0	E	FALSE	FALSE	TRUE	FALSE	none	none	hocomoco_v11	none	-	-
AIRE	OSMR	0	E	FALSE	FALSE	TRUE	FALSE	none	none	hocomoco_v11	none	-	-
AIRE	OTOS	0	E	FALSE	FALSE	TRUE	FALSE	none	none	hocomoco_v11	none	-	-
AIRE	OXR1	0	E	FALSE	FALSE	TRUE	FALSE	none	none	hocomoco_v11	none	-	-
AIRE	PAPOLB	0	E	FALSE	FALSE	TRUE	FALSE	none	none	hocomoco_v11	none	-	-
AIRE	PARD3	0	E	FALSE	FALSE	TRUE	FALSE	none	none	hocomoco_v11	none	-	-
AIRE	PBRM1	0	E	FALSE	FALSE	TRUE	FALSE	none	none	hocomoco_v11	none	-	-
AIRE	PCDHGA8	0	E	FALSE	FALSE	TRUE	FALSE	none	none	hocomoco_v11	none	-	-
AIRE	PFKM	0	E	FALSE	FALSE	TRUE	FALSE	none	none	hocomoco_v11	none	-	-
AIRE	PI16	0	E	FALSE	FALSE	TRUE	FALSE	none	none	hocomoco_v11	none	-	-
AIRE	PIEZO2	0	E	FALSE	FALSE	TRUE	FALSE	none	none	hocomoco_v11	none	-	-
AIRE	PIK3CG	0	E	FALSE	FALSE	TRUE	FALSE	none	none	hocomoco_v11	none	-	-
AIRE	PIP4K2B	0	E	FALSE	FALSE	TRUE	FALSE	none	none	hocomoco_v11	none	-	-
AIRE	PIP5K1B	0	E	FALSE	FALSE	TRUE	FALSE	none	none	hocomoco_v11	none	-	-
AIRE	PKN2	0	E	FALSE	FALSE	TRUE	FALSE	none	none	hocomoco_v11	none	-	-
AIRE	PLEK2	0	E	FALSE	FALSE	TRUE	FALSE	none	none	hocomoco_v11	none	-	-
AIRE	PLEKHA8	0	E	FALSE	FALSE	TRUE	FALSE	none	none	hocomoco_v11	none	-	-
AIRE	PLPBP	0	E	FALSE	FALSE	TRUE	FALSE	none	none	hocomoco_v11	none	-	-
AIRE	PLS1	0	E	FALSE	FALSE	TRUE	FALSE	none	none	hocomoco_v11	none	-	-
AIRE	PLXNA4	0	E	FALSE	FALSE	TRUE	FALSE	none	none	hocomoco_v11	none	-	-
AIRE	POU3F4	0	E	FALSE	FALSE	TRUE	FALSE	none	none	hocomoco_v11	none	-	-
AIRE	PPP1R8	0	E	FALSE	FALSE	TRUE	FALSE	none	none	hocomoco_v11	none	-	-
AIRE	PPP1R9A	0	E	FALSE	FALSE	TRUE	FALSE	none	none	hocomoco_v11	none	-	-
AIRE	PRB2	0	E	FALSE	FALSE	TRUE	FALSE	none	none	hocomoco_v11	none	-	-
AIRE	PRB3	0	E	FALSE	FALSE	TRUE	FALSE	none	none	hocomoco_v11	none	-	-
AIRE	PRB4	0	E	FALSE	FALSE	TRUE	FALSE	none	none	hocomoco_v11	none	-	-
AIRE	PRKN	0	E	FALSE	FALSE	TRUE	FALSE	none	none	hocomoco_v11	none	-	-
AIRE	PRODH2	0	E	FALSE	FALSE	TRUE	FALSE	none	none	hocomoco_v11	none	-	-
AIRE	PRPF39	0	E	FALSE	FALSE	TRUE	FALSE	none	none	hocomoco_v11	none	-	-
AIRE	PTGES3L	0	E	FALSE	FALSE	TRUE	FALSE	none	none	hocomoco_v11	none	-	-
AIRE	PTGES3L-AARSD1	0	E	FALSE	FALSE	TRUE	FALSE	none	none	hocomoco_v11	none	-	-
AIRE	RAB3B	0	E	FALSE	FALSE	TRUE	FALSE	none	none	hocomoco_v11	none	-	-
AIRE	RAB4A	0	E	FALSE	FALSE	TRUE	FALSE	none	none	hocomoco_v11	none	-	-
AIRE	RABGAP1L	0	E	FALSE	FALSE	TRUE	FALSE	none	none	hocomoco_v11	none	-	-
AIRE	RABL6	0	E	FALSE	FALSE	TRUE	FALSE	none	none	hocomoco_v11	none	-	-
AIRE	RADIL	0	E	FALSE	FALSE	TRUE	FALSE	none	none	hocomoco_v11	none	-	-
AIRE	RAI14	0	E	FALSE	FALSE	TRUE	FALSE	none	none	hocomoco_v11	none	-	-
AIRE	RBBP6	0	E	FALSE	FALSE	TRUE	FALSE	none	none	hocomoco_v11	none	-	-
AIRE	RBM39	0	E	FALSE	FALSE	TRUE	FALSE	none	none	hocomoco_v11	none	-	-
AIRE	RETREG2	0	E	FALSE	FALSE	TRUE	FALSE	none	none	hocomoco_v11	none	-	-
AIRE	RFWD2	0	E	FALSE	FALSE	TRUE	FALSE	none	none	hocomoco_v11	none	-	-
AIRE	RGS9	0	E	FALSE	FALSE	TRUE	FALSE	none	none	hocomoco_v11	none	-	-
AIRE	RHAG	0	E	FALSE	FALSE	TRUE	FALSE	none	none	hocomoco_v11	none	-	-
AIRE	RLIM	0	E	FALSE	FALSE	TRUE	FALSE	none	none	hocomoco_v11	none	-	-
AIRE	RNASEL	0	E	FALSE	FALSE	TRUE	FALSE	none	none	hocomoco_v11	none	-	-
AIRE	RNF121	0	E	FALSE	FALSE	TRUE	FALSE	none	none	hocomoco_v11	none	-	-
AIRE	RNF186	0	E	FALSE	FALSE	TRUE	FALSE	none	none	hocomoco_v11	none	-	-
AIRE	RPA2	0	E	FALSE	FALSE	TRUE	FALSE	none	none	hocomoco_v11	none	-	-
AIRE	RPE	0	E	FALSE	FALSE	TRUE	FALSE	none	none	hocomoco_v11	none	-	-
AIRE	RPGRIP1	0	E	FALSE	FALSE	TRUE	FALSE	none	none	hocomoco_v11	none	-	-
AIRE	RPL13	0	E	FALSE	FALSE	TRUE	FALSE	none	none	hocomoco_v11	none	-	-
AIRE	RPS6KA6	0	E	FALSE	FALSE	TRUE	FALSE	none	none	hocomoco_v11	none	-	-
AIRE	SBNO1	0	E	FALSE	FALSE	TRUE	FALSE	none	none	hocomoco_v11	none	-	-
AIRE	SCAF4	0	E	FALSE	FALSE	TRUE	FALSE	none	none	hocomoco_v11	none	-	-
AIRE	SDCCAG8	0	E	FALSE	FALSE	TRUE	FALSE	none	none	hocomoco_v11	none	-	-
AIRE	SDR39U1	0	E	FALSE	FALSE	TRUE	FALSE	none	none	hocomoco_v11	none	-	-
AIRE	SEC22A	0	E	FALSE	FALSE	TRUE	FALSE	none	none	hocomoco_v11	none	-	-
AIRE	SEC24D	0	E	FALSE	FALSE	TRUE	FALSE	none	none	hocomoco_v11	none	-	-
AIRE	SELL	0	E	FALSE	FALSE	TRUE	FALSE	none	none	hocomoco_v11	none	-	-
AIRE	SEMA6A	0	E	FALSE	FALSE	TRUE	FALSE	none	none	hocomoco_v11	none	-	-
AIRE	SEMA6B	0	E	FALSE	FALSE	TRUE	FALSE	none	none	hocomoco_v11	none	-	-
AIRE	SESTD1	0	E	FALSE	FALSE	TRUE	FALSE	none	none	hocomoco_v11	none	-	-
AIRE	SETDB1	0	E	FALSE	FALSE	TRUE	FALSE	none	none	hocomoco_v11	none	-	-
AIRE	SGMS2	0	E	FALSE	FALSE	TRUE	FALSE	none	none	hocomoco_v11	none	-	-
AIRE	SH2D4B	0	E	FALSE	FALSE	TRUE	FALSE	none	none	hocomoco_v11	none	-	-
AIRE	SHCBP1	0	E	FALSE	FALSE	TRUE	FALSE	none	none	hocomoco_v11	none	-	-
AIRE	SLC12A1	0	E	FALSE	FALSE	TRUE	FALSE	none	none	hocomoco_v11	none	-	-
AIRE	SLC12A8	0	E	FALSE	FALSE	TRUE	FALSE	none	none	hocomoco_v11	none	-	-
AIRE	SLC13A1	0	E	FALSE	FALSE	TRUE	FALSE	none	none	hocomoco_v11	none	-	-
AIRE	SLC22A1	0	E	FALSE	FALSE	TRUE	FALSE	none	none	hocomoco_v11	none	-	-
AIRE	SLC25A38	0	E	FALSE	FALSE	TRUE	FALSE	none	none	hocomoco_v11	none	-	-
AIRE	SLC30A10	0	E	FALSE	FALSE	TRUE	FALSE	none	none	hocomoco_v11	none	-	-
AIRE	SLC38A2	0	E	FALSE	FALSE	TRUE	FALSE	none	none	hocomoco_v11	none	-	-
AIRE	SLC4A4	0	E	FALSE	FALSE	TRUE	FALSE	none	none	hocomoco_v11	none	-	-
AIRE	SLCO4C1	0	E	FALSE	FALSE	TRUE	FALSE	none	none	hocomoco_v11	none	-	-
AIRE	SNX17	0	E	FALSE	FALSE	TRUE	FALSE	none	none	hocomoco_v11	none	-	-
AIRE	SOX5	0	E	FALSE	FALSE	TRUE	FALSE	none	none	hocomoco_v11	none	-	-
AIRE	SPAG11B	0	E	FALSE	FALSE	TRUE	FALSE	none	none	hocomoco_v11	none	-	-
AIRE	SPARCL1	0	E	FALSE	FALSE	TRUE	FALSE	none	none	hocomoco_v11	none	-	-
AIRE	SPATA13	0	E	FALSE	FALSE	TRUE	FALSE	none	none	hocomoco_v11	none	-	-
AIRE	SPRR2G	0	E	FALSE	FALSE	TRUE	FALSE	none	none	hocomoco_v11	none	-	-
AIRE	STARD7	0	E	FALSE	FALSE	TRUE	FALSE	none	none	hocomoco_v11	none	-	-
AIRE	STK33	0	E	FALSE	FALSE	TRUE	FALSE	none	none	hocomoco_v11	none	-	-
AIRE	STXBP5	0	E	FALSE	FALSE	TRUE	FALSE	none	none	hocomoco_v11	none	-	-
AIRE	SUN3	0	E	FALSE	FALSE	TRUE	FALSE	none	none	hocomoco_v11	none	-	-
AIRE	SUPT20H	0	E	FALSE	FALSE	TRUE	FALSE	none	none	hocomoco_v11	none	-	-
AIRE	SYNJ2BP	0	E	FALSE	FALSE	TRUE	FALSE	none	none	hocomoco_v11	none	-	-
AIRE	SYNJ2BP-COX16	0	E	FALSE	FALSE	TRUE	FALSE	none	none	hocomoco_v11	none	-	-
AIRE	SYNRG	0	E	FALSE	FALSE	TRUE	FALSE	none	none	hocomoco_v11	none	-	-
AIRE	SYT14	0	E	FALSE	FALSE	TRUE	FALSE	none	none	hocomoco_v11	none	-	-
AIRE	SYT4	0	E	FALSE	FALSE	TRUE	FALSE	none	none	hocomoco_v11	none	-	-
AIRE	TATDN3	0	E	FALSE	FALSE	TRUE	FALSE	none	none	hocomoco_v11	none	-	-
AIRE	TBC1D22B	0	E	FALSE	FALSE	TRUE	FALSE	none	none	hocomoco_v11	none	-	-
AIRE	TBC1D30	0	E	FALSE	FALSE	TRUE	FALSE	none	none	hocomoco_v11	none	-	-
AIRE	TBC1D31	0	E	FALSE	FALSE	TRUE	FALSE	none	none	hocomoco_v11	none	-	-
AIRE	TBP	0	E	FALSE	FALSE	TRUE	FALSE	none	none	hocomoco_v11	none	-	-
AIRE	TC2N	0	E	FALSE	FALSE	TRUE	FALSE	none	none	hocomoco_v11	none	-	-
AIRE	TCF4	0	E	FALSE	FALSE	TRUE	FALSE	none	none	hocomoco_v11	none	-	-
AIRE	TCF7L2	0	E	FALSE	FALSE	TRUE	FALSE	none	none	hocomoco_v11	none	-	-
AIRE	TDRD5	0	E	FALSE	FALSE	TRUE	FALSE	none	none	hocomoco_v11	none	-	-
AIRE	TFAP2D	0	E	FALSE	FALSE	TRUE	FALSE	none	none	hocomoco_v11	none	-	-
AIRE	TFDP2	0	E	FALSE	FALSE	TRUE	FALSE	none	none	hocomoco_v11	none	-	-
AIRE	THRAP3	0	E	FALSE	FALSE	TRUE	FALSE	none	none	hocomoco_v11	none	-	-
AIRE	THSD4	0	E	FALSE	FALSE	TRUE	FALSE	none	none	hocomoco_v11	none	-	-
AIRE	TK2	0	E	FALSE	FALSE	TRUE	FALSE	none	none	hocomoco_v11	none	-	-
AIRE	TKTL2	0	E	FALSE	FALSE	TRUE	FALSE	none	none	hocomoco_v11	none	-	-
AIRE	TMC2	0	E	FALSE	FALSE	TRUE	FALSE	none	none	hocomoco_v11	none	-	-
AIRE	TMEM219	0	E	FALSE	FALSE	TRUE	FALSE	none	none	hocomoco_v11	none	-	-
AIRE	TMEM237	0	E	FALSE	FALSE	TRUE	FALSE	none	none	hocomoco_v11	none	-	-
AIRE	TMPRSS11B	0	E	FALSE	FALSE	TRUE	FALSE	none	none	hocomoco_v11	none	-	-
AIRE	TNFSF12	0	E	FALSE	FALSE	TRUE	FALSE	none	none	hocomoco_v11	none	-	-
AIRE	TNFSF12-TNFSF13	0	E	FALSE	FALSE	TRUE	FALSE	none	none	hocomoco_v11	none	-	-
AIRE	TOP3A	0	E	FALSE	FALSE	TRUE	FALSE	none	none	hocomoco_v11	none	-	-
AIRE	TOPBP1	0	E	FALSE	FALSE	TRUE	FALSE	none	none	hocomoco_v11	none	-	-
AIRE	TRDN	0	E	FALSE	FALSE	TRUE	FALSE	none	none	hocomoco_v11	none	-	-
AIRE	TRIB1	0	E	FALSE	FALSE	TRUE	FALSE	none	none	hocomoco_v11	none	-	-
AIRE	TRMT44	0	E	FALSE	FALSE	TRUE	FALSE	none	none	hocomoco_v11	none	-	-
AIRE	TRPC4	0	E	FALSE	FALSE	TRUE	FALSE	none	none	hocomoco_v11	none	-	-
AIRE	TRPM7	0	E	FALSE	FALSE	TRUE	FALSE	none	none	hocomoco_v11	none	-	-
AIRE	TSGA10	0	E	FALSE	FALSE	TRUE	FALSE	none	none	hocomoco_v11	none	-	-
AIRE	TSPAN19	0	E	FALSE	FALSE	TRUE	FALSE	none	none	hocomoco_v11	none	-	-
AIRE	TTC28	0	E	FALSE	FALSE	TRUE	FALSE	none	none	hocomoco_v11	none	-	-
AIRE	TUBA8	0	E	FALSE	FALSE	TRUE	FALSE	none	none	hocomoco_v11	none	-	-
AIRE	TUSC1	0	E	FALSE	FALSE	TRUE	FALSE	none	none	hocomoco_v11	none	-	-
AIRE	UBA6	0	E	FALSE	FALSE	TRUE	FALSE	none	none	hocomoco_v11	none	-	-
AIRE	UBC	0	E	FALSE	FALSE	TRUE	FALSE	none	none	hocomoco_v11	none	-	-
AIRE	UNC5D	0	E	FALSE	FALSE	TRUE	FALSE	none	none	hocomoco_v11	none	-	-
AIRE	URI1	0	E	FALSE	FALSE	TRUE	FALSE	none	none	hocomoco_v11	none	-	-
AIRE	USP47	0	E	FALSE	FALSE	TRUE	FALSE	none	none	hocomoco_v11	none	-	-
AIRE	XPO1	0	E	FALSE	FALSE	TRUE	FALSE	none	none	hocomoco_v11	none	-	-
AIRE	XYLB	0	E	FALSE	FALSE	TRUE	FALSE	none	none	hocomoco_v11	none	-	-
AIRE	ZBTB37	0	E	FALSE	FALSE	TRUE	FALSE	none	none	hocomoco_v11	none	-	-
AIRE	ZC3H12D	0	E	FALSE	FALSE	TRUE	FALSE	none	none	hocomoco_v11	none	-	-
AIRE	ZCCHC4	0	E	FALSE	FALSE	TRUE	FALSE	none	none	hocomoco_v11	none	-	-
AIRE	ZNF19	0	E	FALSE	FALSE	TRUE	FALSE	none	none	hocomoco_v11	none	-	-
AIRE	ZNF257	0	E	FALSE	FALSE	TRUE	FALSE	none	none	hocomoco_v11	none	-	-
AIRE	ZNF274	0	E	FALSE	FALSE	TRUE	FALSE	none	none	hocomoco_v11	none	-	-
AIRE	ZNF296	0	E	FALSE	FALSE	TRUE	FALSE	none	none	hocomoco_v11	none	-	-
AIRE	ZNF311	0	E	FALSE	FALSE	TRUE	FALSE	none	none	hocomoco_v11	none	-	-
AIRE	ZNF404	0	E	FALSE	FALSE	TRUE	FALSE	none	none	hocomoco_v11	none	-	-
AIRE	ZNF432	0	E	FALSE	FALSE	TRUE	FALSE	none	none	hocomoco_v11	none	-	-
AIRE	ZNF462	0	E	FALSE	FALSE	TRUE	FALSE	none	none	hocomoco_v11	none	-	-
AIRE	ZNF517	0	E	FALSE	FALSE	TRUE	FALSE	none	none	hocomoco_v11	none	-	-
AIRE	ZNF607	0	E	FALSE	FALSE	TRUE	FALSE	none	none	hocomoco_v11	none	-	-
AIRE	ZNF675	0	E	FALSE	FALSE	TRUE	FALSE	none	none	hocomoco_v11	none	-	-
AIRE	ZNF680	0	E	FALSE	FALSE	TRUE	FALSE	none	none	hocomoco_v11	none	-	-
AIRE	ZNF711	0	E	FALSE	FALSE	TRUE	FALSE	none	none	hocomoco_v11	none	-	-
AIRE	ZNF729	0	E	FALSE	FALSE	TRUE	FALSE	none	none	hocomoco_v11	none	-	-
AIRE	ZNF99	0	E	FALSE	FALSE	TRUE	FALSE	none	none	hocomoco_v11	none	-	-
AIRE	ZNHIT6	0	E	FALSE	FALSE	TRUE	FALSE	none	none	hocomoco_v11	none	-	-
AIRE	ZPBP2	0	E	FALSE	FALSE	TRUE	FALSE	none	none	hocomoco_v11	none	-	-
AIRE	ZPLD1	0	E	FALSE	FALSE	TRUE	FALSE	none	none	hocomoco_v11	none	-	-
AIRE	ZSCAN26	0	E	FALSE	FALSE	TRUE	FALSE	none	none	hocomoco_v11	none	-	-
AIRE	ZSCAN5A	0	E	FALSE	FALSE	TRUE	FALSE	none	none	hocomoco_v11	none	-	-
ALX1	AADACL2	0	E	FALSE	FALSE	TRUE	FALSE	none	none	hocomoco_v11	none	-	-
ALX1	AANAT	0	E	FALSE	FALSE	TRUE	FALSE	none	none	hocomoco_v11	none	-	-
ALX1	ABCA1	0	E	FALSE	FALSE	TRUE	FALSE	none	none	hocomoco_v11	none	-	-
ALX1	ABCA13	0	E	FALSE	FALSE	TRUE	FALSE	none	none	jaspar_v2018	none	-	-
ALX1	ABCC4	0	E	FALSE	FALSE	TRUE	FALSE	none	none	jaspar_v2018	none	-	-
ALX1	ABCG1	0	E	FALSE	FALSE	TRUE	FALSE	none	none	hocomoco_v11	none	-	-
ALX1	ABHD3	0	E	FALSE	FALSE	TRUE	FALSE	none	none	hocomoco_v11	none	-	-
ALX1	ACAD10	0	E	FALSE	FALSE	TRUE	FALSE	none	none	hocomoco_v11	none	-	-
ALX1	ACAD11	0	E	FALSE	FALSE	TRUE	FALSE	none	none	jaspar_v2018	none	-	-
ALX1	ACSM3	0	E	FALSE	FALSE	TRUE	FALSE	none	none	hocomoco_v11	none	-	-
ALX1	ACTR3C	0	E	FALSE	FALSE	TRUE	FALSE	none	none	jaspar_v2018	none	-	-
ALX1	ADAM20	0	E	FALSE	FALSE	TRUE	FALSE	none	none	hocomoco_v11	none	-	-
ALX1	ADAMTS9	0	E	FALSE	FALSE	TRUE	FALSE	none	none	hocomoco_v11	none	-	-
ALX1	ADD1	0	E	FALSE	FALSE	TRUE	FALSE	none	none	jaspar_v2018	none	-	-
ALX1	ADGRE1	0	E	FALSE	FALSE	TRUE	FALSE	none	none	hocomoco_v11	none	-	-
ALX1	ADH1A	0	E	FALSE	FALSE	TRUE	FALSE	none	none	jaspar_v2018	none	-	-
ALX1	AGBL5	0	E	FALSE	FALSE	TRUE	FALSE	none	none	hocomoco_v11	none	-	-
ALX1	AGR3	0	E	FALSE	FALSE	TRUE	FALSE	none	none	hocomoco_v11	none	-	-
ALX1	AGTPBP1	0	E	FALSE	FALSE	TRUE	FALSE	none	none	hocomoco_v11	none	-	-
ALX1	AK2	0	E	FALSE	FALSE	TRUE	FALSE	none	none	hocomoco_v11	none	-	-
ALX1	AKAP17A	0	E	FALSE	FALSE	TRUE	FALSE	none	none	hocomoco_v11	none	-	-
ALX1	AKIRIN2	0	E	FALSE	FALSE	TRUE	FALSE	none	none	hocomoco_v11	none	-	-
ALX1	AKR7L	0	E	FALSE	FALSE	TRUE	FALSE	none	none	hocomoco_v11	none	-	-
ALX1	ALB	0	E	FALSE	FALSE	TRUE	FALSE	none	none	hocomoco_v11	none	-	-
ALX1	ALCAM	0	E	FALSE	FALSE	TRUE	FALSE	none	none	hocomoco_v11	none	-	-
ALX1	ALG10	0	E	FALSE	FALSE	TRUE	FALSE	none	none	jaspar_v2018	none	-	-
ALX1	ALG10B	0	E	FALSE	FALSE	TRUE	FALSE	none	none	jaspar_v2018	none	-	-
ALX1	ALG14	0	E	FALSE	FALSE	TRUE	FALSE	none	none	jaspar_v2018	none	-	-
ALX1	ALPP	0	E	FALSE	FALSE	TRUE	FALSE	none	none	jaspar_v2018	none	-	-
ALX1	AMELX	0	E	FALSE	FALSE	TRUE	FALSE	none	none	hocomoco_v11	none	-	-
ALX1	AMELY	0	E	FALSE	FALSE	TRUE	FALSE	none	none	hocomoco_v11	none	-	-
ALX1	AMY2B	0	E	FALSE	FALSE	TRUE	FALSE	none	none	hocomoco_v11	none	-	-
ALX1	ANAPC16	0	E	FALSE	FALSE	TRUE	FALSE	none	none	jaspar_v2018	none	-	-
ALX1	ANGPTL2	0	E	FALSE	FALSE	TRUE	FALSE	none	none	jaspar_v2018	none	-	-
ALX1	ANGPTL6	0	E	FALSE	FALSE	TRUE	FALSE	none	none	jaspar_v2018	none	-	-
ALX1	ANKRD36	0	E	FALSE	FALSE	TRUE	FALSE	none	none	hocomoco_v11	none	-	-
ALX1	ANKS1A	0	E	FALSE	FALSE	TRUE	FALSE	none	none	jaspar_v2018	none	-	-
ALX1	ANXA10	0	E	FALSE	FALSE	TRUE	FALSE	none	none	jaspar_v2018	none	-	-
ALX1	API5	0	E	FALSE	FALSE	TRUE	FALSE	none	none	hocomoco_v11	none	-	-
ALX1	APLF	0	E	FALSE	FALSE	TRUE	FALSE	none	none	hocomoco_v11	none	-	-
ALX1	ARAP2	0	E	FALSE	FALSE	TRUE	FALSE	none	none	hocomoco_v11	none	-	-
ALX1	ARHGAP12	0	E	FALSE	FALSE	TRUE	FALSE	none	none	hocomoco_v11	none	-	-
ALX1	ARHGAP32	0	E	FALSE	FALSE	TRUE	FALSE	none	none	hocomoco_v11	none	-	-
ALX1	ARL13A	0	E	FALSE	FALSE	TRUE	FALSE	none	none	hocomoco_v11	none	-	-
ALX1	ARL4D	0	E	FALSE	FALSE	TRUE	FALSE	none	none	hocomoco_v11	none	-	-
ALX1	ARMC3	0	E	FALSE	FALSE	TRUE	FALSE	none	none	jaspar_v2018	none	-	-
ALX1	ARPP21	0	E	FALSE	FALSE	TRUE	FALSE	none	none	hocomoco_v11	none	-	-
ALX1	ART3	0	E	FALSE	FALSE	TRUE	FALSE	none	none	hocomoco_v11	none	-	-
ALX1	ATAD5	0	E	FALSE	FALSE	TRUE	FALSE	none	none	hocomoco_v11	none	-	-
ALX1	ATF7IP	0	E	FALSE	FALSE	TRUE	FALSE	none	none	hocomoco_v11	none	-	-
ALX1	ATP11B	0	E	FALSE	FALSE	TRUE	FALSE	none	none	hocomoco_v11	none	-	-
ALX1	ATP11C	0	E	FALSE	FALSE	TRUE	FALSE	none	none	jaspar_v2018	none	-	-
ALX1	ATP12A	0	E	FALSE	FALSE	TRUE	FALSE	none	none	jaspar_v2018	none	-	-
ALX1	ATP5A1	0	E	FALSE	FALSE	TRUE	FALSE	none	none	hocomoco_v11	none	-	-
ALX1	ATP6AP1L	0	E	FALSE	FALSE	TRUE	FALSE	none	none	jaspar_v2018	none	-	-
ALX1	ATP6V0D1	0	E	FALSE	FALSE	TRUE	FALSE	none	none	jaspar_v2018	none	-	-
ALX1	ATP7B	0	E	FALSE	FALSE	TRUE	FALSE	none	none	jaspar_v2018	none	-	-
ALX1	AUTS2	0	E	FALSE	FALSE	TRUE	FALSE	none	none	hocomoco_v11	none	-	-
ALX1	AXDND1	0	E	FALSE	FALSE	TRUE	FALSE	none	none	hocomoco_v11	none	-	-
ALX1	AZI2	0	E	FALSE	FALSE	TRUE	FALSE	none	none	jaspar_v2018	none	-	-
ALX1	B3GNTL1	0	E	FALSE	FALSE	TRUE	FALSE	none	none	jaspar_v2018	none	-	-
ALX1	BAAT	0	E	FALSE	FALSE	TRUE	FALSE	none	none	hocomoco_v11	none	-	-
ALX1	BABAM1	0	E	FALSE	FALSE	TRUE	FALSE	none	none	hocomoco_v11	none	-	-
ALX1	BACE2	0	E	FALSE	FALSE	TRUE	FALSE	none	none	jaspar_v2018	none	-	-
ALX1	BAZ1A	0	E	FALSE	FALSE	TRUE	FALSE	none	none	jaspar_v2018	none	-	-
ALX1	BCL9	0	E	FALSE	FALSE	TRUE	FALSE	none	none	hocomoco_v11	none	-	-
ALX1	BFAR	0	E	FALSE	FALSE	TRUE	FALSE	none	none	jaspar_v2018	none	-	-
ALX1	BRCC3	0	E	FALSE	FALSE	TRUE	FALSE	none	none	jaspar_v2018	none	-	-
ALX1	BTBD10	0	E	FALSE	FALSE	TRUE	FALSE	none	none	hocomoco_v11	none	-	-
ALX1	BTBD11	0	E	FALSE	FALSE	TRUE	FALSE	none	none	jaspar_v2018	none	-	-
ALX1	BTBD3	0	E	FALSE	FALSE	TRUE	FALSE	none	none	hocomoco_v11	none	-	-
ALX1	BTN3A1	0	E	FALSE	FALSE	TRUE	FALSE	none	none	jaspar_v2018	none	-	-
ALX1	BTN3A2	0	E	FALSE	FALSE	TRUE	FALSE	none	none	jaspar_v2018	none	-	-
ALX1	BTN3A3	0	E	FALSE	FALSE	TRUE	FALSE	none	none	jaspar_v2018	none	-	-
ALX1	BTNL8	0	E	FALSE	FALSE	TRUE	FALSE	none	none	hocomoco_v11	none	-	-
ALX1	C11orf63	0	E	FALSE	FALSE	TRUE	FALSE	none	none	hocomoco_v11	none	-	-
ALX1	C14orf105	0	E	FALSE	FALSE	TRUE	FALSE	none	none	hocomoco_v11	none	-	-
ALX1	C15orf48	0	E	FALSE	FALSE	TRUE	FALSE	none	none	hocomoco_v11	none	-	-
ALX1	C1orf61	0	E	FALSE	FALSE	TRUE	FALSE	none	none	hocomoco_v11	none	-	-
ALX1	C4orf26	0	E	FALSE	FALSE	TRUE	FALSE	none	none	jaspar_v2018	none	-	-
ALX1	C5orf63	0	E	FALSE	FALSE	TRUE	FALSE	none	none	jaspar_v2018	none	-	-
ALX1	C6orf58	0	E	FALSE	FALSE	TRUE	FALSE	none	none	jaspar_v2018	none	-	-
ALX1	C7orf77	0	E	FALSE	FALSE	TRUE	FALSE	none	none	jaspar_v2018	none	-	-
ALX1	C9orf40	0	E	FALSE	FALSE	TRUE	FALSE	none	none	jaspar_v2018	none	-	-
ALX1	CA1	0	E	FALSE	FALSE	TRUE	FALSE	none	none	hocomoco_v11	none	-	-
ALX1	CABLES1	0	E	FALSE	FALSE	TRUE	FALSE	none	none	hocomoco_v11	none	-	-
ALX1	CACNA1D	0	E	FALSE	FALSE	TRUE	FALSE	none	none	hocomoco_v11	none	-	-
ALX1	CARD10	0	E	FALSE	FALSE	TRUE	FALSE	none	none	jaspar_v2018	none	-	-
ALX1	CASC10	0	E	FALSE	FALSE	TRUE	FALSE	none	none	jaspar_v2018	none	-	-
ALX1	CAST	0	E	FALSE	FALSE	TRUE	FALSE	none	none	jaspar_v2018	none	-	-
ALX1	CASZ1	0	E	FALSE	FALSE	TRUE	FALSE	none	none	jaspar_v2018	none	-	-
ALX1	CBLB	0	E	FALSE	FALSE	TRUE	FALSE	none	none	hocomoco_v11	none	-	-
ALX1	CBWD5	0	E	FALSE	FALSE	TRUE	FALSE	none	none	hocomoco_v11,jaspar_v2018	none	-	-
ALX1	CBWD6	0	E	FALSE	FALSE	TRUE	FALSE	none	none	hocomoco_v11	none	-	-
ALX1	CCDC130	0	E	FALSE	FALSE	TRUE	FALSE	none	none	hocomoco_v11	none	-	-
ALX1	CCDC168	0	E	FALSE	FALSE	TRUE	FALSE	none	none	jaspar_v2018	none	-	-
ALX1	CCDC172	0	E	FALSE	FALSE	TRUE	FALSE	none	none	jaspar_v2018	none	-	-
ALX1	CCDC190	0	E	FALSE	FALSE	TRUE	FALSE	none	none	jaspar_v2018	none	-	-
ALX1	CCDC81	0	E	FALSE	FALSE	TRUE	FALSE	none	none	hocomoco_v11	none	-	-
ALX1	CCDC88A	0	E	FALSE	FALSE	TRUE	FALSE	none	none	jaspar_v2018	none	-	-
ALX1	CCDC91	0	E	FALSE	FALSE	TRUE	FALSE	none	none	hocomoco_v11	none	-	-
ALX1	CCL17	0	E	FALSE	FALSE	TRUE	FALSE	none	none	hocomoco_v11	none	-	-
ALX1	CCNB1IP1	0	E	FALSE	FALSE	TRUE	FALSE	none	none	jaspar_v2018	none	-	-
ALX1	CCNL1	0	E	FALSE	FALSE	TRUE	FALSE	none	none	hocomoco_v11	none	-	-
ALX1	CCR6	0	E	FALSE	FALSE	TRUE	FALSE	none	none	jaspar_v2018	none	-	-
ALX1	CCR8	0	E	FALSE	FALSE	TRUE	FALSE	none	none	hocomoco_v11	none	-	-
ALX1	CD14	0	E	FALSE	FALSE	TRUE	FALSE	none	none	jaspar_v2018	none	-	-
ALX1	CD302	0	E	FALSE	FALSE	TRUE	FALSE	none	none	hocomoco_v11	none	-	-
ALX1	CD320	0	E	FALSE	FALSE	TRUE	FALSE	none	none	jaspar_v2018	none	-	-
ALX1	CD36	0	E	FALSE	FALSE	TRUE	FALSE	none	none	hocomoco_v11	none	-	-
ALX1	CD96	0	E	FALSE	FALSE	TRUE	FALSE	none	none	hocomoco_v11	none	-	-
ALX1	CDC7	0	E	FALSE	FALSE	TRUE	FALSE	none	none	jaspar_v2018	none	-	-
ALX1	CDCA7	0	E	FALSE	FALSE	TRUE	FALSE	none	none	jaspar_v2018	none	-	-
ALX1	CDCA7L	0	E	FALSE	FALSE	TRUE	FALSE	none	none	hocomoco_v11	none	-	-
ALX1	CDH17	0	E	FALSE	FALSE	TRUE	FALSE	none	none	hocomoco_v11	none	-	-
ALX1	CDH19	0	E	FALSE	FALSE	TRUE	FALSE	none	none	hocomoco_v11	none	-	-
ALX1	CDK13	0	E	FALSE	FALSE	TRUE	FALSE	none	none	jaspar_v2018	none	-	-
ALX1	CDK15	0	E	FALSE	FALSE	TRUE	FALSE	none	none	hocomoco_v11	none	-	-
ALX1	CDK19	0	E	FALSE	FALSE	TRUE	FALSE	none	none	hocomoco_v11	none	-	-
ALX1	CDK5	0	E	FALSE	FALSE	TRUE	FALSE	none	none	jaspar_v2018	none	-	-
ALX1	CDK8	0	E	FALSE	FALSE	TRUE	FALSE	none	none	jaspar_v2018	none	-	-
ALX1	CDKN2C	0	E	FALSE	FALSE	TRUE	FALSE	none	none	jaspar_v2018	none	-	-
ALX1	CDS1	0	E	FALSE	FALSE	TRUE	FALSE	none	none	hocomoco_v11,jaspar_v2018	none	-	-
ALX1	CENPE	0	E	FALSE	FALSE	TRUE	FALSE	none	none	hocomoco_v11	none	-	-
ALX1	CEP290	0	E	FALSE	FALSE	TRUE	FALSE	none	none	hocomoco_v11	none	-	-
ALX1	CEP85L	0	E	FALSE	FALSE	TRUE	FALSE	none	none	hocomoco_v11	none	-	-
ALX1	CEPT1	0	E	FALSE	FALSE	TRUE	FALSE	none	none	jaspar_v2018	none	-	-
ALX1	CFAP47	0	E	FALSE	FALSE	TRUE	FALSE	none	none	hocomoco_v11	none	-	-
ALX1	CFAP61	0	E	FALSE	FALSE	TRUE	FALSE	none	none	hocomoco_v11	none	-	-
ALX1	CHD7	0	E	FALSE	FALSE	TRUE	FALSE	none	none	hocomoco_v11	none	-	-
ALX1	CHI3L1	0	E	FALSE	FALSE	TRUE	FALSE	none	none	jaspar_v2018	none	-	-
ALX1	CHIC1	0	E	FALSE	FALSE	TRUE	FALSE	none	none	jaspar_v2018	none	-	-
ALX1	CHMP7	0	E	FALSE	FALSE	TRUE	FALSE	none	none	jaspar_v2018	none	-	-
ALX1	CHN1	0	E	FALSE	FALSE	TRUE	FALSE	none	none	hocomoco_v11	none	-	-
ALX1	CHRNA4	0	E	FALSE	FALSE	TRUE	FALSE	none	none	jaspar_v2018	none	-	-
ALX1	CHRNE	0	E	FALSE	FALSE	TRUE	FALSE	none	none	hocomoco_v11	none	-	-
ALX1	CHST11	0	E	FALSE	FALSE	TRUE	FALSE	none	none	hocomoco_v11	none	-	-
ALX1	CLASP2	0	E	FALSE	FALSE	TRUE	FALSE	none	none	hocomoco_v11	none	-	-
ALX1	CLCN5	0	E	FALSE	FALSE	TRUE	FALSE	none	none	jaspar_v2018	none	-	-
ALX1	CLEC2B	0	E	FALSE	FALSE	TRUE	FALSE	none	none	jaspar_v2018	none	-	-
ALX1	CLEC4D	0	E	FALSE	FALSE	TRUE	FALSE	none	none	jaspar_v2018	none	-	-
ALX1	CLIP1	0	E	FALSE	FALSE	TRUE	FALSE	none	none	jaspar_v2018	none	-	-
ALX1	CLIP4	0	E	FALSE	FALSE	TRUE	FALSE	none	none	hocomoco_v11	none	-	-
ALX1	CLLU1OS	0	E	FALSE	FALSE	TRUE	FALSE	none	none	jaspar_v2018	none	-	-
ALX1	CLPB	0	E	FALSE	FALSE	TRUE	FALSE	none	none	hocomoco_v11	none	-	-
ALX1	CLVS2	0	E	FALSE	FALSE	TRUE	FALSE	none	none	hocomoco_v11	none	-	-
ALX1	CMTM4	0	E	FALSE	FALSE	TRUE	FALSE	none	none	jaspar_v2018	none	-	-
ALX1	CMTR1	0	E	FALSE	FALSE	TRUE	FALSE	none	none	jaspar_v2018	none	-	-
ALX1	CNIH1	0	E	FALSE	FALSE	TRUE	FALSE	none	none	hocomoco_v11	none	-	-
ALX1	CNP	0	E	FALSE	FALSE	TRUE	FALSE	none	none	jaspar_v2018	none	-	-
ALX1	CNTRL	0	E	FALSE	FALSE	TRUE	FALSE	none	none	hocomoco_v11	none	-	-
ALX1	COL10A1	0	E	FALSE	FALSE	TRUE	FALSE	none	none	jaspar_v2018	none	-	-
ALX1	COL14A1	0	E	FALSE	FALSE	TRUE	FALSE	none	none	hocomoco_v11	none	-	-
ALX1	COL4A6	0	E	FALSE	FALSE	TRUE	FALSE	none	none	jaspar_v2018	none	-	-
ALX1	COPB1	0	E	FALSE	FALSE	TRUE	FALSE	none	none	hocomoco_v11	none	-	-
ALX1	COPS2	0	E	FALSE	FALSE	TRUE	FALSE	none	none	jaspar_v2018	none	-	-
ALX1	CPED1	0	E	FALSE	FALSE	TRUE	FALSE	none	none	jaspar_v2018	none	-	-
ALX1	CPNE3	0	E	FALSE	FALSE	TRUE	FALSE	none	none	hocomoco_v11	none	-	-
ALX1	CRHBP	0	E	FALSE	FALSE	TRUE	FALSE	none	none	hocomoco_v11	none	-	-
ALX1	CRYGC	0	E	FALSE	FALSE	TRUE	FALSE	none	none	hocomoco_v11	none	-	-
ALX1	CSGALNACT1	0	E	FALSE	FALSE	TRUE	FALSE	none	none	hocomoco_v11	none	-	-
ALX1	CSNK1A1	0	E	FALSE	FALSE	TRUE	FALSE	none	none	hocomoco_v11	none	-	-
ALX1	CSTF2T	0	E	FALSE	FALSE	TRUE	FALSE	none	none	jaspar_v2018	none	-	-
ALX1	CTDSPL2	0	E	FALSE	FALSE	TRUE	FALSE	none	none	hocomoco_v11	none	-	-
ALX1	CTNNAL1	0	E	FALSE	FALSE	TRUE	FALSE	none	none	hocomoco_v11	none	-	-
ALX1	CTNNBL1	0	E	FALSE	FALSE	TRUE	FALSE	none	none	jaspar_v2018	none	-	-
ALX1	CTNND1	0	E	FALSE	FALSE	TRUE	FALSE	none	none	hocomoco_v11	none	-	-
ALX1	CUX2	0	E	FALSE	FALSE	TRUE	FALSE	none	none	hocomoco_v11	none	-	-
ALX1	CXCL13	0	E	FALSE	FALSE	TRUE	FALSE	none	none	hocomoco_v11	none	-	-
ALX1	CXorf23	0	E	FALSE	FALSE	TRUE	FALSE	none	none	hocomoco_v11	none	-	-
ALX1	CYFIP2	0	E	FALSE	FALSE	TRUE	FALSE	none	none	jaspar_v2018	none	-	-
ALX1	CYLD	0	E	FALSE	FALSE	TRUE	FALSE	none	none	jaspar_v2018	none	-	-
ALX1	CYP20A1	0	E	FALSE	FALSE	TRUE	FALSE	none	none	hocomoco_v11	none	-	-
ALX1	DAB1	0	E	FALSE	FALSE	TRUE	FALSE	none	none	hocomoco_v11	none	-	-
ALX1	DAZAP2	0	E	FALSE	FALSE	TRUE	FALSE	none	none	hocomoco_v11	none	-	-
ALX1	DBX1	0	E	FALSE	FALSE	TRUE	FALSE	none	none	hocomoco_v11,jaspar_v2018	none	-	-
ALX1	DCAF17	0	E	FALSE	FALSE	TRUE	FALSE	none	none	hocomoco_v11	none	-	-
ALX1	DCT	0	E	FALSE	FALSE	TRUE	FALSE	none	none	jaspar_v2018	none	-	-
ALX1	DCTN2	0	E	FALSE	FALSE	TRUE	FALSE	none	none	hocomoco_v11	none	-	-
ALX1	DCX	0	E	FALSE	FALSE	TRUE	FALSE	none	none	jaspar_v2018	none	-	-
ALX1	DEC1	0	E	FALSE	FALSE	TRUE	FALSE	none	none	jaspar_v2018	none	-	-
ALX1	DEFB113	0	E	FALSE	FALSE	TRUE	FALSE	none	none	jaspar_v2018	none	-	-
ALX1	DEFB114	0	E	FALSE	FALSE	TRUE	FALSE	none	none	jaspar_v2018	none	-	-
ALX1	DEFB119	0	E	FALSE	FALSE	TRUE	FALSE	none	none	jaspar_v2018	none	-	-
ALX1	DENND5B	0	E	FALSE	FALSE	TRUE	FALSE	none	none	hocomoco_v11	none	-	-
ALX1	DFNB59	0	E	FALSE	FALSE	TRUE	FALSE	none	none	hocomoco_v11	none	-	-
ALX1	DHRS2	0	E	FALSE	FALSE	TRUE	FALSE	none	none	hocomoco_v11	none	-	-
ALX1	DHRS7	0	E	FALSE	FALSE	TRUE	FALSE	none	none	jaspar_v2018	none	-	-
ALX1	DHX15	0	E	FALSE	FALSE	TRUE	FALSE	none	none	jaspar_v2018	none	-	-
ALX1	DHX32	0	E	FALSE	FALSE	TRUE	FALSE	none	none	hocomoco_v11	none	-	-
ALX1	DICER1	0	E	FALSE	FALSE	TRUE	FALSE	none	none	hocomoco_v11	none	-	-
ALX1	DIP2C	0	E	FALSE	FALSE	TRUE	FALSE	none	none	jaspar_v2018	none	-	-
ALX1	DLC1	0	E	FALSE	FALSE	TRUE	FALSE	none	none	jaspar_v2018	none	-	-
ALX1	DLD	0	E	FALSE	FALSE	TRUE	FALSE	none	none	jaspar_v2018	none	-	-
ALX1	DLGAP1	0	E	FALSE	FALSE	TRUE	FALSE	none	none	jaspar_v2018	none	-	-
ALX1	DMD	0	E	FALSE	FALSE	TRUE	FALSE	none	none	hocomoco_v11,jaspar_v2018	none	-	-
ALX1	DNAJC1	0	E	FALSE	FALSE	TRUE	FALSE	none	none	jaspar_v2018	none	-	-
ALX1	DNAJC2	0	E	FALSE	FALSE	TRUE	FALSE	none	none	hocomoco_v11	none	-	-
ALX1	DNAJC6	0	E	FALSE	FALSE	TRUE	FALSE	none	none	hocomoco_v11	none	-	-
ALX1	DNM3	0	E	FALSE	FALSE	TRUE	FALSE	none	none	jaspar_v2018	none	-	-
ALX1	DOCK10	0	E	FALSE	FALSE	TRUE	FALSE	none	none	jaspar_v2018	none	-	-
ALX1	DOCK9	0	E	FALSE	FALSE	TRUE	FALSE	none	none	hocomoco_v11	none	-	-
ALX1	DPP8	0	E	FALSE	FALSE	TRUE	FALSE	none	none	jaspar_v2018	none	-	-
ALX1	DRC3	0	E	FALSE	FALSE	TRUE	FALSE	none	none	hocomoco_v11	none	-	-
ALX1	DRGX	0	E	FALSE	FALSE	TRUE	FALSE	none	none	hocomoco_v11	none	-	-
ALX1	DSE	0	E	FALSE	FALSE	TRUE	FALSE	none	none	hocomoco_v11	none	-	-
ALX1	DTNA	0	E	FALSE	FALSE	TRUE	FALSE	none	none	hocomoco_v11	none	-	-
ALX1	DUS4L	0	E	FALSE	FALSE	TRUE	FALSE	none	none	jaspar_v2018	none	-	-
ALX1	DYRK1A	0	E	FALSE	FALSE	TRUE	FALSE	none	none	hocomoco_v11	none	-	-
ALX1	DZIP1	0	E	FALSE	FALSE	TRUE	FALSE	none	none	hocomoco_v11	none	-	-
ALX1	DZIP3	0	E	FALSE	FALSE	TRUE	FALSE	none	none	hocomoco_v11	none	-	-
ALX1	EDA	0	E	FALSE	FALSE	TRUE	FALSE	none	none	jaspar_v2018	none	-	-
ALX1	EFCAB7	0	E	FALSE	FALSE	TRUE	FALSE	none	none	hocomoco_v11	none	-	-
ALX1	EFHC1	0	E	FALSE	FALSE	TRUE	FALSE	none	none	hocomoco_v11	none	-	-
ALX1	ELF1	0	E	FALSE	FALSE	TRUE	FALSE	none	none	hocomoco_v11	none	-	-
ALX1	ELF2	0	E	FALSE	FALSE	TRUE	FALSE	none	none	hocomoco_v11	none	-	-
ALX1	ELMO1	0	E	FALSE	FALSE	TRUE	FALSE	none	none	jaspar_v2018	none	-	-
ALX1	ENAH	0	E	FALSE	FALSE	TRUE	FALSE	none	none	hocomoco_v11	none	-	-
ALX1	EOMES	0	E	FALSE	FALSE	TRUE	FALSE	none	none	hocomoco_v11	none	-	-
ALX1	ERC2	0	E	FALSE	FALSE	TRUE	FALSE	none	none	jaspar_v2018	none	-	-
ALX1	ERCC4	0	E	FALSE	FALSE	TRUE	FALSE	none	none	jaspar_v2018	none	-	-
ALX1	ERVV-1	0	E	FALSE	FALSE	TRUE	FALSE	none	none	jaspar_v2018	none	-	-
ALX1	ESCO2	0	E	FALSE	FALSE	TRUE	FALSE	none	none	jaspar_v2018	none	-	-
ALX1	ETF1	0	E	FALSE	FALSE	TRUE	FALSE	none	none	hocomoco_v11	none	-	-
ALX1	EVI2A	0	E	FALSE	FALSE	TRUE	FALSE	none	none	hocomoco_v11	none	-	-
ALX1	EVI2B	0	E	FALSE	FALSE	TRUE	FALSE	none	none	hocomoco_v11	none	-	-
ALX1	EYS	0	E	FALSE	FALSE	TRUE	FALSE	none	none	hocomoco_v11	none	-	-
ALX1	FABP2	0	E	FALSE	FALSE	TRUE	FALSE	none	none	jaspar_v2018	none	-	-
ALX1	FAM120AOS	0	E	FALSE	FALSE	TRUE	FALSE	none	none	hocomoco_v11	none	-	-
ALX1	FAM19A2	0	E	FALSE	FALSE	TRUE	FALSE	none	none	hocomoco_v11	none	-	-
ALX1	FAM208A	0	E	FALSE	FALSE	TRUE	FALSE	none	none	hocomoco_v11	none	-	-
ALX1	FAM214A	0	E	FALSE	FALSE	TRUE	FALSE	none	none	jaspar_v2018	none	-	-
[truncated: 63,536 more rows]
